# Supplementary material for: Single-Cell RNA Sequencing Reveals the Role of Epithelial Cell Marker Genes in Predicting the Prognosis of Colorectal Cancer Patients
Source: Hindawi journal article supplement (doi:10.1155/2022/8347125), 2022-08-01
Supplement: f2 [file 8347125.f2.zip]

**Table S2** CNV score of epithelial cell subclusters

| Cell                     | Celltype               | CNV Score |
|--------------------------|------------------------|-----------|
| AGATTGCGTCTCCCTA-1_CRC0  | Epithelial cells type1 | 1501      |
| TGGACGCGTTACCGAT-1_CRC0  | Epithelial cells type1 | 2056      |
| CACAGGCCATTCACTT-1_CRC0  | Epithelial cells type1 | 1444      |
| CTGAAACTCAGTTAGC-1_CRC0  | Epithelial cells type1 | 1283      |
| ACGCAGCAGGTGCACA-1_CRC0  | Epithelial cells type1 | 1761      |
| CACACCTTCCTAGTGA-1_CRC0  | Epithelial cells type1 | 1374      |
| CACAGGCGTTCAGCGC-1_CRC0  | Epithelial cells type1 | 2360      |
| CTACCCAGTCAATACC-1_CRC0  | Epithelial cells type1 | 2008      |
| GCAGCCACACCATGTA-1_CRC0  | Epithelial cells type1 | 1927      |
| AACTCCCTCCTCTAGC-1_CRC0  | Epithelial cells type1 | 1416      |
| GGAATAAGTAGTACCT-1_CRC0  | Epithelial cells type1 | 1422      |
| TCGTACCAGAATGTTG-1_CRC0  | Epithelial cells type1 | 1906      |
| ATCATCTGTATATGAG-1_CRC0  | Epithelial cells type1 | 2060      |
| TCCCGATAGGTTACCT-1_CRC0  | Epithelial cells type1 | 1587      |
| GGCCGATCACTTCGAA-1_CRC0  | Epithelial cells type1 | 1565      |
| GGGCACTCATCCGGGT-1_CRC0  | Epithelial cells type1 | 1582      |
| AGGCCGTAGTCTTGCA-1_CRC0  | Epithelial cells type1 | 2199      |
| GCATGTATCATGTAGC-1_CRC0  | Epithelial cells type1 | 2081      |
| CGCTATCCATGGGAAC-1_CRC0  | Epithelial cells type1 | 2216      |
| CTGAAGTAGTTGAGAT-1_CRC0  | Epithelial cells type1 | 2323      |
| CATCGAAAGCCAGTTT-1_CRC0  | Epithelial cells type1 | 1779      |
| ACTTTCATCTCTGAGA-1_CRC0  | Epithelial cells type1 | 1850      |
| CCCTCCTGTTTAGCTG-1_CRC0  | Epithelial cells type1 | 1964      |
| CATGGCGAGGAACTGC-1_CRC0  | Epithelial cells type1 | 1383      |
| GACCAATGTGCGAAAC-1_CRC0  | Epithelial cells type1 | 1515      |
| GGTATTGCATCACGAT-1_CRC0  | Epithelial cells type1 | 2052      |
| CTGATAGCACCGTTGG-1_CRC0  | Epithelial cells type1 | 2263      |
| GTCCTCAGTCTAGTCA-1_CRC0  | Epithelial cells type1 | 2115      |
| GTCGTAACAGCTGTAT-1_CRC0  | Epithelial cells type1 | 1716      |
| CCTATTACAATGTTGC-1_CRC0  | Epithelial cells type1 | 2336      |
| CCTTCCCAGAGACGAA-1_CRC0  | Epithelial cells type1 | 1429      |
| GCAATCATCACGAAGG-1_CRC0  | Epithelial cells type1 | 1765      |
| CACCAGGTCCAAGCCG-1_CRC0  | Epithelial cells type1 | 1912      |
| GTCCTCACACCAGGTC-1_CRC0  | Epithelial cells type1 | 1912      |
| TTAGTTCAGTCCCACG-1_CRC0  | Epithelial cells type1 | 1879      |
| TTTCCTCCATCCTAGA-1_CRC0  | Epithelial cells type1 | 2503      |
| CCCATACCAAGCGATG-1_CRC0  | Epithelial cells type1 | 2166      |
| TAGTGGTCAGCTGTAT-1_CRC0  | Epithelial cells type1 | 1847      |
| GTGCATAGTCTAGTCA-1_CRC0  | Epithelial cells type1 | 2163      |
| GTTAAGCAGCCAGTAG-1_CRC0  | Epithelial cells type1 | 2462      |
| AAAGTAGAGCTGTCTA-1_CRC0  | Epithelial cells type1 | 1730      |
| GCACTCTCATTAGGCT-1_CRC0  | Epithelial cells type1 | 1837      |
| GTACTTTTCGGCGCAT-1_CRC0  | Epithelial cells type1 | 1884      |
| TGTGTTTTACCGTAA-1_CRC0   | Epithelial cells type1 | 2179      |
| TTCTACATCCATGAAC-1_CRC0  | Epithelial cells type1 | 2029      |
| CTGCCTATCCAACCAA-1_CRC0  | Epithelial cells type1 | 2100      |
| GATGCTAGTCGCATCG-1_CRC0  | Epithelial cells type1 | 1981      |
| TCGAGGCTCCGCTGTT-1_CRC0  | Epithelial cells type1 | 2128      |
| AAGGTTTCGTCTCCACT-1_CRC0 | Epithelial cells type1 | 2103      |

|                         |                        |      |
|-------------------------|------------------------|------|
| CATCAAGGTCCTCTTG-1_CRC0 | Epithelial cells type1 | 1897 |
| AGTCTTTGTCGACTGC-1_CRC0 | Epithelial cells type1 | 1505 |
| GTTACAGAGCGTGTCC-1_CRC0 | Epithelial cells type1 | 1640 |
| AAATGCCGTGACAAAT-1_CRC0 | Epithelial cells type1 | 2251 |
| GCATGATGTCATCGGC-1_CRC0 | Epithelial cells type1 | 1750 |
| CAACTAGCACCAACCG-1_CRC0 | Epithelial cells type1 | 1796 |
| CGCTATCGTAGCACGA-1_CRC0 | Epithelial cells type1 | 1546 |
| GGTGCGTCATCTGGTA-1_CRC0 | Epithelial cells type1 | 1869 |
| AGCAGCCTCATCGGAT-1_CRC0 | Epithelial cells type1 | 2323 |
| GCTGGGTCAAGACGTG-1_CRC0 | Epithelial cells type1 | 1987 |
| ACTTGTTCAGTTTACG-1_CRC0 | Epithelial cells type1 | 1790 |
| CCTAGCTTCAACACCA-1_CRC0 | Epithelial cells type1 | 2528 |
| ATCTGCCTCCACGACG-1_CRC0 | Epithelial cells type1 | 1747 |
| ATTCTACGTATTCGTG-1_CRC0 | Epithelial cells type1 | 2013 |
| CCCTCCTTCACTTATC-1_CRC0 | Epithelial cells type1 | 1982 |
| TTCCAGTCACAATGC-1_CRC0  | Epithelial cells type1 | 1418 |
| CGTCAGGTCTAACTGG-1_CRC0 | Epithelial cells type1 | 1625 |
| ATCCGAAGTGAGCGAT-1_CRC0 | Epithelial cells type1 | 1007 |
| GGGCACTGTTCGGCAC-1_CRC0 | Epithelial cells type1 | 1703 |
| ATGAGGGTCTGCCCTA-1_CRC0 | Epithelial cells type1 | 1566 |
| CTACATTTCTCGTATT-1_CRC0 | Epithelial cells type1 | 1384 |
| GCAGTTAAGCTGAAAT-1_CRC0 | Epithelial cells type1 | 1589 |
| GCACATATCATGTAGC-1_CRC0 | Epithelial cells type1 | 1512 |
| GGCCGATCACGCCAGT-1_CRC0 | Epithelial cells type1 | 1635 |
| TGAGGGACATGAAGTA-1_CRC0 | Epithelial cells type1 | 1944 |
| ATCCGAACAAGTTCTG-1_CRC0 | Epithelial cells type1 | 1978 |
| TACTTACCAGGTCGTC-1_CRC0 | Epithelial cells type1 | 1985 |
| GCGACCATCCCAAGTA-1_CRC0 | Epithelial cells type1 | 2417 |
| AAGGTTCTCAGAGGTG-1_CRC0 | Epithelial cells type1 | 2436 |
| AGGGATGCAGGTCTCG-1_CRC0 | Epithelial cells type1 | 1509 |
| TCAGGTAGTCATATCG-1_CRC0 | Epithelial cells type1 | 1804 |
| CGCTTCAGTGCACCAC-1_CRC0 | Epithelial cells type1 | 1621 |
| TCAGCAACAAGCTGGA-1_CRC0 | Epithelial cells type1 | 1561 |
| ATAAGAGGTTGCGAC-1_CRC0  | Epithelial cells type1 | 1901 |
| CAAGATCGTAATTGGA-1_CRC0 | Epithelial cells type1 | 1575 |
| ACCCACTGTTAGTGGG-1_CRC0 | Epithelial cells type1 | 1505 |
| AGGTCCGAGGAGTACC-1_CRC0 | Epithelial cells type1 | 1160 |
| CGGCTAGAGATATACG-1_CRC0 | Epithelial cells type1 | 1264 |
| ACCGTAAGTTGTACAC-1_CRC0 | Epithelial cells type1 | 1666 |
| ACCTTTAAGTCCATAC-1_CRC0 | Epithelial cells type1 | 1525 |
| ACCTTTATCATGTGGT-1_CRC0 | Epithelial cells type1 | 1947 |
| TACTTGTAGATCCGAG-1_CRC0 | Epithelial cells type1 | 1245 |
| CTGCTGTTCAGTTTGG-1_CRC0 | Epithelial cells type1 | 1379 |
| TCTGGAAAGTACGTAA-1_CRC0 | Epithelial cells type1 | 1632 |
| CCCAGTTGTGGTACAG-1_CRC0 | Epithelial cells type1 | 1685 |
| CGGCTAGTCGCCAGCA-1_CRC0 | Epithelial cells type1 | 1801 |
| AGTGGGACATTCTCAT-1_CRC0 | Epithelial cells type1 | 1864 |
| TACTCGCGTAAATGAC-1_CRC0 | Epithelial cells type1 | 1318 |
| AGTAGTCAGCCCAATT-1_CRC0 | Epithelial cells type1 | 1914 |
| AAGGAGCGTGCACTTA-1_CRC0 | Epithelial cells type1 | 1463 |
| TGGGAAGGTACAGTGG-1_CRC0 | Epithelial cells type1 | 1692 |

|                         |                        |      |
|-------------------------|------------------------|------|
| ATCTGCCTCTCTTGAT-1_CRC0 | Epithelial cells type1 | 1860 |
| CTAACTTCATTCTCG-1_CRC0  | Epithelial cells type1 | 1609 |
| CTTTGCGGTGTTTGTG-1_CRC0 | Epithelial cells type1 | 1788 |
| TCTCTAATCGCATGAT-1_CRC0 | Epithelial cells type1 | 1582 |
| TGGCCAGCACGAAGCA-1_CRC0 | Epithelial cells type1 | 1988 |
| CGATCGGAGCCTTGAT-1_CRC0 | Epithelial cells type1 | 2579 |
| ACAGCTAGTAAACCTC-1_CRC0 | Epithelial cells type1 | 2514 |
| CCTCAGTCAGATCGGA-1_CRC0 | Epithelial cells type1 | 1696 |
| TCATTTGCAGGCTCAC-1_CRC0 | Epithelial cells type1 | 2050 |
| ATCTACTAGTCGAGTG-1_CRC0 | Epithelial cells type1 | 2262 |
| CAGAATCTCCAAGTAC-1_CRC0 | Epithelial cells type1 | 1641 |
| ACGCCGATCAGGCAAG-1_CRC0 | Epithelial cells type1 | 2133 |
| CCTTTCTGTTGGGACA-1_CRC0 | Epithelial cells type1 | 1624 |
| TCGTACCTCCTCATTA-1_CRC0 | Epithelial cells type1 | 1208 |
| AGAGCGACAGCGTTCG-1_CRC0 | Epithelial cells type1 | 2044 |
| TAGGCATAGCCTCGTG-1_CRC0 | Epithelial cells type1 | 1562 |
| TGCACCTGTGCTTCTC-1_CRC0 | Epithelial cells type1 | 1858 |
| CAGCCGAAGGCGACAT-1_CRC0 | Epithelial cells type1 | 1804 |
| GTTTCTATCCCATTAT-1_CRC0 | Epithelial cells type1 | 1802 |
| CAACCAATCGTACCGG-1_CRC0 | Epithelial cells type1 | 1703 |
| CGCGGTAAGTGGCACA-1_CRC0 | Epithelial cells type1 | 1782 |
| CGCTGGATCAGAGACG-1_CRC0 | Epithelial cells type1 | 1545 |
| AGCCTAACATTCTCG-1_CRC0  | Epithelial cells type1 | 1691 |
| GGGCATCAGGGCTTGA-1_CRC0 | Epithelial cells type1 | 1181 |
| TCATTACGTGCCTGCA-1_CRC0 | Epithelial cells type1 | 1782 |
| TGGCCAGTCGCTAGCG-1_CRC0 | Epithelial cells type1 | 1405 |
| CCCATACTCTATCGCC-1_CRC0 | Epithelial cells type1 | 1311 |
| TCATTTGGTTCTGAAC-1_CRC0 | Epithelial cells type1 | 1812 |
| CACACTCCATCAGTAC-1_CRC0 | Epithelial cells type1 | 1333 |
| TGCGGGTGTAAGAGGA-1_CRC0 | Epithelial cells type1 | 1499 |
| CGTTAGAAGACTGTAA-1_CRC0 | Epithelial cells type1 | 1275 |
| TGAGCATTCCAAAGTC-1_CRC0 | Epithelial cells type1 | 1499 |
| GTTCTCGTCATGCATG-1_CRC0 | Epithelial cells type1 | 1503 |
| ACATGGTCAGCCACCA-1_CRC0 | Epithelial cells type1 | 1365 |
| AGAGTGGGTTTGCATG-1_CRC0 | Epithelial cells type1 | 1390 |
| TACGGGCCACTTCGAA-1_CRC0 | Epithelial cells type1 | 1519 |
| TCGTACCAGTGCTGCC-1_CRC0 | Epithelial cells type1 | 1448 |
| ATCTGCCCAAGGCTCC-1_CRC0 | Epithelial cells type1 | 2453 |
| CGAATGTAGAGCTGGT-1_CRC0 | Epithelial cells type1 | 1891 |
| GGACGTCTCCAAGTAC-1_CRC0 | Epithelial cells type1 | 1560 |
| AACTTTCCAGATCCAT-1_CRC0 | Epithelial cells type1 | 1955 |
| CTTAGGAAGTTATCGC-1_CRC0 | Epithelial cells type1 | 1789 |
| CCTTTCTTCGAAATA-1_CRC0  | Epithelial cells type1 | 1506 |
| CGAGCACGTGTTTGGT-1_CRC0 | Epithelial cells type1 | 1336 |
| CGACCTTGTAGCGTAG-1_CRC0 | Epithelial cells type1 | 2653 |
| ATAAGAGCACGTGAGA-1_CRC0 | Epithelial cells type1 | 1470 |
| GGGCACTAGGATTCGG-1_CRC0 | Epithelial cells type1 | 1603 |
| ACACCGGAGTCGCCGT-1_CRC0 | Epithelial cells type1 | 1598 |
| CCATGTGCTACTTGAC-1_CRC0 | Epithelial cells type1 | 1234 |
| GTGTGCGAGTACGCGA-1_CRC0 | Epithelial cells type1 | 1484 |
| GACTAACAGGGTTTCT-1_CRC0 | Epithelial cells type1 | 1395 |

|                          |                        |      |
|--------------------------|------------------------|------|
| GTCTTCGCAATCGGTT-1_CRC0  | Epithelial cells type1 | 985  |
| GCCTCTAAGTGCCATT-1_CRC0  | Epithelial cells type1 | 1574 |
| CCCAGTTTCGCTAGCG-1_CRC0  | Epithelial cells type1 | 1900 |
| TACTTGTC AAGAGTCG-1_CRC0 | Epithelial cells type1 | 1807 |
| ACGAGCCGTCGAGTTT-1_CRC0  | Epithelial cells type1 | 1775 |
| CTAGCCTGTGGTGTAG-1_CRC0  | Epithelial cells type1 | 2108 |
| CGAGAAGAGGTGATAT-1_CRC0  | Epithelial cells type1 | 1828 |
| GACTACATCCCGGATG-1_CRC0  | Epithelial cells type1 | 1562 |
| AGGTCCGTCAGTACGT-1_CRC0  | Epithelial cells type1 | 1500 |
| CCTTCCCCAGCTCGCA-1_CRC0  | Epithelial cells type1 | 1806 |
| CGTGTAAGGTCATCT-1_CRC0   | Epithelial cells type1 | 1564 |
| TTCTTAGGTAAATGTG-1_CRC0  | Epithelial cells type1 | 1373 |
| ACCTTTAGTCCGTGAC-1_CRC0  | Epithelial cells type1 | 1779 |
| TAGTGGTAGGTGCACA-1_CRC0  | Epithelial cells type1 | 1619 |
| ACGGGTCTCATGTGGT-1_CRC0  | Epithelial cells type1 | 1440 |
| CGACCTTCAGACAAGC-1_CRC0  | Epithelial cells type1 | 1920 |
| GGCTCGAAGAGATGAG-1_CRC0  | Epithelial cells type1 | 1623 |
| AGATCTGGTTCCTCCA-1_CRC0  | Epithelial cells type1 | 1467 |
| CACACAATCAGCACAT-1_CRC0  | Epithelial cells type1 | 1704 |
| TCAGGATAGAGTACAT-1_CRC0  | Epithelial cells type1 | 1658 |
| ATTTCTGTGGAACGGA-1_CRC0  | Epithelial cells type1 | 1930 |
| GGGTTGCGTAGGAGTC-1_CRC0  | Epithelial cells type1 | 1742 |
| CCATGTGCGTTGTGGAG-1_CRC0 | Epithelial cells type1 | 1715 |
| GCGCAACGTTATCCGA-1_CRC0  | Epithelial cells type1 | 1749 |
| ACACCCTTCTTACCTA-1_CRC0  | Epithelial cells type1 | 1774 |
| AGAGTGGTCAGTACGT-1_CRC0  | Epithelial cells type1 | 1849 |
| GCTGCGACAAGTCATC-1_CRC0  | Epithelial cells type1 | 2197 |
| AGCATACCAGCTGTAT-1_CRC0  | Epithelial cells type1 | 1830 |
| CTCATTAAGAGACGAA-1_CRC0  | Epithelial cells type1 | 1365 |
| GGCTGGTGTAGAAAGG-1_CRC0  | Epithelial cells type1 | 1785 |
| CTAGCCTCAATAAGCA-1_CRC0  | Epithelial cells type1 | 1917 |
| AGCATACGTCCAGTGC-1_CRC0  | Epithelial cells type1 | 1656 |
| CTCTACGCACTGTTAG-1_CRC0  | Epithelial cells type1 | 1851 |
| GATCTAGGTTGGTTTG-1_CRC0  | Epithelial cells type1 | 1896 |
| CTCATTACAATCACAC-1_CRC0  | Epithelial cells type1 | 1959 |
| CGACTTCGTTGATTCG-1_CRC0  | Epithelial cells type1 | 1770 |
| GAATGAAAGTGGAGTC-1_CRC0  | Epithelial cells type1 | 1615 |
| CAAGAAAAGAATTCCC-1_CRC0  | Epithelial cells type1 | 1957 |
| CATTATCAGGACAGAA-1_CRC0  | Epithelial cells type1 | 1439 |
| TGTATTCACTACACCT-1_CRC0  | Epithelial cells type1 | 1801 |
| GGAATAACAATCCAAC-1_CRC0  | Epithelial cells type1 | 1470 |
| GGAATGGTTACCAGT-1_CRC0   | Epithelial cells type1 | 1923 |
| TCTATTGAGCCCAACC-1_CRC0  | Epithelial cells type1 | 1479 |
| ACGGCCATCTGAGGGA-1_CRC0  | Epithelial cells type1 | 1995 |
| CTGAAACCAAGGGTCA-1_CRC0  | Epithelial cells type1 | 1745 |
| AGGGTGACAATGGAGC-1_CRC0  | Epithelial cells type1 | 1685 |
| ATTACTCCAAAGCGGT-1_CRC0  | Epithelial cells type1 | 1431 |
| ACGGAGACACAGACAG-1_CRC0  | Epithelial cells type1 | 1171 |
| CACACCTAGAGTACAT-1_CRC0  | Epithelial cells type1 | 1468 |
| GATCGCGTCCTATGTT-1_CRC0  | Epithelial cells type1 | 1224 |
| GATGCTAAGCGGATCA-1_CRC0  | Epithelial cells type1 | 1350 |

|                          |                        |      |
|--------------------------|------------------------|------|
| CTGATAGAGACTAAGT-1_CRC0  | Epithelial cells type1 | 1994 |
| TTTATGCCAGCATACT-1_CRC0  | Epithelial cells type1 | 1704 |
| CGTAGGCTCAGTCCCT-1_CRC0  | Epithelial cells type1 | 1742 |
| ACCTTTATCAAGATCC-1_CRC0  | Epithelial cells type1 | 1129 |
| CACACCTCACGTCTCT-1_CRC0  | Epithelial cells type1 | 1266 |
| TCGTACCTCAACTCTT-1_CRC0  | Epithelial cells type1 | 1942 |
| CCAATCAGTTCCACA-1_CRC0   | Epithelial cells type1 | 1632 |
| GGTGAAGAGATTACCC-1_CRC0  | Epithelial cells type1 | 1671 |
| GTTCGGGAGTAGGCCA-1_CRC0  | Epithelial cells type1 | 1879 |
| AGTGAGGTCTAACTTC-1_CRC0  | Epithelial cells type1 | 1538 |
| CTCGAAACAAGTCTGT-1_CRC0  | Epithelial cells type1 | 1645 |
| TCGTACCTCACCACCT-1_CRC0  | Epithelial cells type1 | 1469 |
| ACGCCGATCATTTGGG-1_CRC0  | Epithelial cells type1 | 1764 |
| TGCACCTGTCTAAACC-1_CRC0  | Epithelial cells type1 | 1661 |
| CGTCCATTACCCGAG-1_CRC0   | Epithelial cells type1 | 1872 |
| CTCTAATTCCCGACTT-1_CRC0  | Epithelial cells type1 | 1690 |
| GATCGCGTCTGCTGCT-1_CRC0  | Epithelial cells type1 | 1901 |
| AAAGTAGAGAGTACAT-1_CRC0  | Epithelial cells type1 | 2078 |
| AGCGTATAGTGCCATT-1_CRC0  | Epithelial cells type1 | 1662 |
| ATCGAGTGTTCGAATC-1_CRC0  | Epithelial cells type1 | 1449 |
| TCAACGAGTCAAACCTC-1_CRC0 | Epithelial cells type1 | 1309 |
| ACGATACAGACTAGAT-1_CRC0  | Epithelial cells type1 | 1420 |
| ACTGATGTCGAATGCT-1_CRC0  | Epithelial cells type1 | 1403 |
| ACAGCTAGTGTGGCTC-1_CRC0  | Epithelial cells type1 | 1556 |
| CCCTCCTTCTCGCATC-1_CRC0  | Epithelial cells type1 | 1305 |
| GTGCAGCTCATCTGTT-1_CRC0  | Epithelial cells type1 | 1247 |
| AGGCCGTGTCTACCTC-1_CRC0  | Epithelial cells type1 | 947  |
| CTGATCCCACATCTTT-1_CRC0  | Epithelial cells type1 | 1429 |
| GAAGCAGCATTGAGCT-1_CRC0  | Epithelial cells type1 | 1716 |
| AACTGAAGACTAAGT-1_CRC0   | Epithelial cells type1 | 1769 |
| TTTGGTTTCTAACTTC-1_CRC0  | Epithelial cells type1 | 1601 |
| TGGACGCCAATCCGAT-1_CRC0  | Epithelial cells type1 | 1166 |
| TAGGCATGTTACGTCA-1_CRC0  | Epithelial cells type1 | 1695 |
| GATCTAGGTAATTGGA-1_CRC0  | Epithelial cells type1 | 1692 |
| TGTATTCTCACAACGT-1_CRC0  | Epithelial cells type1 | 1312 |
| CGACCTTTCGACCAGC-1_CRC0  | Epithelial cells type1 | 1262 |
| TAGGCATGTTACGGAG-1_CRC0  | Epithelial cells type1 | 1152 |
| TACCTTAGTCGCGGTT-1_CRC0  | Epithelial cells type1 | 1120 |
| TTTCCTCAGATGAGAG-1_CRC0  | Epithelial cells type1 | 933  |
| CCACTACCATAGAAAC-1_CRC0  | Epithelial cells type1 | 1399 |
| CTTAAGTAGCGTGAGT-1_CRC0  | Epithelial cells type1 | 1287 |
| TTCGAAGCACTGTCGG-1_CRC0  | Epithelial cells type1 | 1626 |
| ACTATCTCATTCTTAC-1_CRC0  | Epithelial cells type1 | 1592 |
| AGCTTGATCTCCTATA-1_CRC0  | Epithelial cells type1 | 1237 |
| CCACGGATCAATCACG-1_CRC0  | Epithelial cells type1 | 1441 |
| CATCAGAGTATAATGG-1_CRC0  | Epithelial cells type1 | 1695 |
| CATATTCTCGACGGA-1_CRC0   | Epithelial cells type1 | 1310 |
| CTCGTACTCTGAGGGA-1_CRC0  | Epithelial cells type1 | 762  |
| CTCTAATGTAGCGCAA-1_CRC0  | Epithelial cells type1 | 1184 |
| CCAATCCCATGACGGA-1_CRC0  | Epithelial cells type1 | 1112 |
| CCTACCAAGGATCGCA-1_CRC0  | Epithelial cells type1 | 1171 |

|                          |                        |      |
|--------------------------|------------------------|------|
| CATGCCTTCGGGAGTA-1_CRC0  | Epithelial cells type1 | 1179 |
| CCCATACAGGCTATCT-1_CRC0  | Epithelial cells type1 | 1411 |
| ACGCCAGAGAGCTTCT-1_CRC0  | Epithelial cells type1 | 1033 |
| ATTTCTGTCACCGGGT-1_CRC0  | Epithelial cells type1 | 719  |
| CAACTAGCATCCCATC-1_CRC0  | Epithelial cells type1 | 768  |
| CTACACCGTTCAACCA-1_CRC0  | Epithelial cells type1 | 1228 |
| GTGCGGTCAACACCTA-1_CRC0  | Epithelial cells type1 | 1144 |
| TCGCGTTGTTACTGAC-1_CRC0  | Epithelial cells type1 | 1406 |
| AAACGGGCATTACCTT-1_CRC0  | Epithelial cells type1 | 1056 |
| GTGTTAGTCTTACCTA-1_CRC0  | Epithelial cells type1 | 1039 |
| CGATCGGTCTTTCCTC-1_CRC0  | Epithelial cells type1 | 1384 |
| CCGGTAGAGCCCGAAA-1_CRC0  | Epithelial cells type1 | 1277 |
| AGACGTTAGCGTCAAG-1_CRC0  | Epithelial cells type1 | 1150 |
| CTCGGGATCACATAGC-1_CRC0  | Epithelial cells type1 | 1143 |
| ACTTTC AAGATGTAAC-1_CRC0 | Epithelial cells type1 | 806  |
| ATAACGCTCGTTACGA-1_CRC0  | Epithelial cells type1 | 933  |
| ACTGATGCAAACCTAC-1_CRC0  | Epithelial cells type1 | 1407 |
| AAGGCAGGTATCAGTC-1_CRC0  | Epithelial cells type1 | 1605 |
| TCTATTGAGACGCAAC-1_CRC0  | Epithelial cells type1 | 1296 |
| CTGCGGATCGTTACGA-1_CRC0  | Epithelial cells type1 | 1824 |
| TTTGT CATCACAATGC-1_CRC0 | Epithelial cells type1 | 1729 |
| GGGATGATCCTACAGA-1_CRC0  | Epithelial cells type1 | 1891 |
| GTGCTTCTCGAGAACG-1_CRC0  | Epithelial cells type1 | 1667 |
| GGCTGGTTCTGCTGTC-1_CRC0  | Epithelial cells type1 | 2118 |
| CAGAGAGGTCCGTCAG-1_CRC0  | Epithelial cells type1 | 1867 |
| TAAGAGAAGACCCACC-1_CRC0  | Epithelial cells type1 | 1480 |
| CGTCAGGGTCTCGTTC-1_CRC0  | Epithelial cells type1 | 1781 |
| CTGGTCTGTCAGATAA-1_CRC0  | Epithelial cells type1 | 1263 |
| AACTCAGAGACCTTTG-1_CRC0  | Epithelial cells type1 | 1423 |
| CTTA ACTGTCAGATAA-1_CRC0 | Epithelial cells type1 | 1385 |
| CTGTGCTCAGTGACAG-1_CRC0  | Epithelial cells type1 | 2058 |
| ACCAGTAGTCATATCG-1_CRC0  | Epithelial cells type1 | 1603 |
| CGAGAAGCACTTACGA-1_CRC0  | Epithelial cells type1 | 1093 |
| CTACATTGTCAGCTAT-1_CRC0  | Epithelial cells type1 | 1311 |
| CTAGAGTGTGTGCGTC-1_CRC0  | Epithelial cells type1 | 1039 |
| AGTCTTTTCTTGTACT-1_CRC0  | Epithelial cells type1 | 911  |
| TACAGTGCATCACGAT-1_CRC0  | Epithelial cells type1 | 1416 |
| GTAACGTTCCGGGTGT-1_CRC0  | Epithelial cells type1 | 1175 |
| TGGCTGGCACTGAAGG-1_CRC0  | Epithelial cells type1 | 1460 |
| TGACTAGGTCCAGTGC-1_CRC0  | Epithelial cells type1 | 804  |
| TTAGGCAGTCAATACC-1_CRC0  | Epithelial cells type1 | 1752 |
| GACGTGCAGAGGGATA-1_CRC0  | Epithelial cells type1 | 2065 |
| AAATGCCGTCGGCACT-1_CRC0  | Epithelial cells type1 | 1501 |
| TCCACACTCGTCGTTC-1_CRC0  | Epithelial cells type1 | 1342 |
| GATCGCGAGTACGCC-1_CRC0   | Epithelial cells type1 | 864  |
| GCGAGAATCAAGATCC-1_CRC0  | Epithelial cells type1 | 1264 |
| GTTCATTTCTTCCTTC-1_CRC0  | Epithelial cells type1 | 1117 |
| GCCTCTACAAAGGCGT-1_CRC0  | Epithelial cells type1 | 1136 |
| TGCCAAACAGACTCGC-1_CRC0  | Epithelial cells type1 | 1264 |
| ACGCAGCGTACTTGAC-1_CRC0  | Epithelial cells type1 | 1640 |
| CGAGCCAGTAAGCACG-1_CRC0  | Epithelial cells type1 | 1443 |

|                          |                        |      |
|--------------------------|------------------------|------|
| GAATAAGTCATAGCAC-1_CRC0  | Epithelial cells type1 | 2018 |
| GTCAAGTGTTTCGTTGA-1_CRC0 | Epithelial cells type1 | 1140 |
| CTCTAATGTCTAGTGT-1_CRC0  | Epithelial cells type1 | 1264 |
| AGTCTTTAGAGGTTAT-1_CRC0  | Epithelial cells type1 | 952  |
| ATGGGAGCATCACGTA-1_CRC0  | Epithelial cells type1 | 1610 |
| ACTGAACAGTGTGGCA-1_CRC0  | Epithelial cells type1 | 1178 |
| TCAGGATGTTATCCGA-1_CRC0  | Epithelial cells type1 | 1209 |
| TGAAAGATCAGCTGGC-1_CRC0  | Epithelial cells type1 | 1624 |
| GTGCAGCAGATTACCC-1_CRC0  | Epithelial cells type1 | 1620 |
| AACCATGAGTGTGAAT-1_CRC0  | Epithelial cells type1 | 1401 |
| CCTCTGAAGATCCCAT-1_CRC0  | Epithelial cells type1 | 1124 |
| GAAACTCCAGCCACCA-1_CRC0  | Epithelial cells type1 | 2051 |
| ACTGAACCATTGGTAC-1_CRC0  | Epithelial cells type1 | 1353 |
| GTACGTACACATGTGT-1_CRC0  | Epithelial cells type1 | 1444 |
| TACAGTGGTTTCGCTC-1_CRC0  | Epithelial cells type1 | 1013 |
| CTACGTCCATGTCGAT-1_CRC0  | Epithelial cells type1 | 1424 |
| CACACTCGTAGGCTGA-1_CRC0  | Epithelial cells type1 | 1154 |
| CTAGAGTAGACAGAGA-1_CRC0  | Epithelial cells type1 | 1391 |
| AGTTGGTGTCAATACC-1_CRC0  | Epithelial cells type1 | 1981 |
| TGGGAAGAGGCTCATT-1_CRC0  | Epithelial cells type1 | 1099 |
| CCTACACTCTGTCAAG-1_CRC0  | Epithelial cells type1 | 1086 |
| GTTTCATTGTAAGCACG-1_CRC0 | Epithelial cells type1 | 1166 |
| AAATGCCTCTATGTGG-1_CRC0  | Epithelial cells type1 | 1598 |
| AATCGGTAGTGTGAAT-1_CRC0  | Epithelial cells type1 | 1438 |
| CAGATCAAGCCGTCGT-1_CRC0  | Epithelial cells type1 | 1595 |
| CCTATTATCAGGCGAA-1_CRC0  | Epithelial cells type1 | 1994 |
| CTACACCCATGTCGAT-1_CRC0  | Epithelial cells type1 | 1605 |
| CTGTTTACAGTACACT-1_CRC0  | Epithelial cells type1 | 1590 |
| CGGCTAGTCACCAGGC-1_CRC0  | Epithelial cells type1 | 828  |
| TATCTCAAGAAGATTC-1_CRC0  | Epithelial cells type1 | 1059 |
| CGACTTCAGCGAGAAA-1_CRC0  | Epithelial cells type1 | 1113 |
| CAGAATCCACACCGAC-1_CRC0  | Epithelial cells type1 | 1480 |
| GGCGACTAGACGCAAC-1_CRC0  | Epithelial cells type1 | 1119 |
| TGGTTCCAGACTACAA-1_CRC0  | Epithelial cells type1 | 1331 |
| GGAAAGCGTACCGTAT-1_CRC0  | Epithelial cells type1 | 1815 |
| GTACTCCCAGCGTCCA-1_CRC0  | Epithelial cells type1 | 2232 |
| CACAGGCTCATTTGGG-1_CRC0  | Epithelial cells type1 | 1706 |
| TTCTTAGTCGCGGATC-1_CRC0  | Epithelial cells type1 | 1600 |
| GCAATCATCAGATAAG-1_CRC0  | Epithelial cells type1 | 1600 |
| TGCACCTCAGCTGTGC-1_CRC0  | Epithelial cells type1 | 1555 |
| CAGCTGGGTCTTGCGG-1_CRC0  | Epithelial cells type1 | 1335 |
| TGACAACCACATTAGC-1_CRC0  | Epithelial cells type1 | 1229 |
| AACTCCCGTCTACCTC-1_CRC0  | Epithelial cells type1 | 1623 |
| ATAAGAGAGCGATATA-1_CRC0  | Epithelial cells type1 | 1160 |
| CCTCTGATCTGCTGCT-1_CRC0  | Epithelial cells type1 | 1135 |
| GTAAGTGCCTCAGGC-1_CRC0   | Epithelial cells type1 | 1909 |
| ACTGCTCAGAATCTCC-1_CRC0  | Epithelial cells type1 | 1648 |
| CAAGTTGTCAACTCTT-1_CRC0  | Epithelial cells type1 | 1813 |
| GCCTCTATCAGTACGT-1_CRC0  | Epithelial cells type1 | 1398 |
| TGAAAGATCGGAGCAA-1_CRC0  | Epithelial cells type1 | 1262 |
| CTACATTGTTCTGTTT-1_CRC0  | Epithelial cells type1 | 1470 |

|                          |                        |      |
|--------------------------|------------------------|------|
| GAATGAATCAGGTTCA-1_CRC0  | Epithelial cells type1 | 1529 |
| GTTTCTACACGGCCAT-1_CRC0  | Epithelial cells type1 | 2717 |
| CTGAAGTCATTTGCTT-1_CRC0  | Epithelial cells type1 | 1459 |
| TGACGGCTCACATACG-1_CRC0  | Epithelial cells type1 | 1783 |
| TTCGAAGTCTGCGACG-1_CRC0  | Epithelial cells type1 | 1839 |
| AAGTCTGAGGACAGAA-1_CRC0  | Epithelial cells type1 | 2440 |
| GCAATCACAAGCCGCT-1_CRC0  | Epithelial cells type1 | 1717 |
| CCGTACTGTGCAGGTA-1_CRC0  | Epithelial cells type1 | 1568 |
| GGGTCTGCACCGAATT-1_CRC0  | Epithelial cells type1 | 1656 |
| GATTCAGAGGCTCTTA-1_CRC0  | Epithelial cells type1 | 1501 |
| TTGACTTGTGCAACGA-1_CRC0  | Epithelial cells type1 | 1497 |
| TCAGCTCGTAGGGTAC-1_CRC0  | Epithelial cells type1 | 2457 |
| TCTCTAAGTCTTGCGG-1_CRC0  | Epithelial cells type1 | 1587 |
| AGTGAGGCATCTCCCA-1_CRC0  | Epithelial cells type1 | 1560 |
| GCTGCAGTCGCATGAT-1_CRC0  | Epithelial cells type1 | 1643 |
| CTAGCCTGTCGTGGCT-1_CRC0  | Epithelial cells type1 | 1797 |
| TACCTATCAGTAACGG-1_CRC0  | Epithelial cells type1 | 1476 |
| ACTTTC AAGTAAGTAC-1_CRC0 | Epithelial cells type1 | 1370 |
| CATGCCTCATCGGGTC-1_CRC0  | Epithelial cells type1 | 1444 |
| GATCTAGGTAAAGTCA-1_CRC0  | Epithelial cells type1 | 1572 |
| CTTTGCGAGAGTAAGG-1_CRC0  | Epithelial cells type1 | 1556 |
| TCACGAACAGCTCCGA-1_CRC0  | Epithelial cells type1 | 2196 |
| CCTTACGTCCGTGTT-1_CRC0   | Epithelial cells type1 | 2057 |
| TCACAAGCAATAACGA-1_CRC0  | Epithelial cells type1 | 1894 |
| CCGTGGAGTAAGTGGC-1_CRC0  | Epithelial cells type1 | 1510 |
| GACGGCTAGGCAGGTT-1_CRC0  | Epithelial cells type1 | 1552 |
| TCCCGATGTGAAATCA-1_CRC0  | Epithelial cells type1 | 2247 |
| ACACCGGCAATGCCAT-1_CRC0  | Epithelial cells type1 | 1697 |
| CCAATCCTCTGCTGTC-1_CRC0  | Epithelial cells type1 | 1319 |
| GATCGTATCTTTAGGG-1_CRC0  | Epithelial cells type1 | 1611 |
| GTCATTTAGACATAAC-1_CRC0  | Epithelial cells type1 | 2289 |
| ACGGGCTCATACGCCG-1_CRC0  | Epithelial cells type1 | 1680 |
| CAGCGACCAGCCAATT-1_CRC0  | Epithelial cells type1 | 1914 |
| ATCACGATCCGTCAAA-1_CRC0  | Epithelial cells type1 | 2357 |
| CGGACACGTCTCATCC-1_CRC0  | Epithelial cells type1 | 2143 |
| GTACGTATCACTCCTG-1_CRC0  | Epithelial cells type1 | 2300 |
| TAGTTGGAGCAATATG-1_CRC0  | Epithelial cells type1 | 2864 |
| CAGCGACCAGGAACGT-1_CRC0  | Epithelial cells type1 | 2172 |
| CTGAAGTAGCATCATC-1_CRC0  | Epithelial cells type1 | 2046 |
| CCGTACTAGAGGACGG-1_CRC0  | Epithelial cells type1 | 1910 |
| AGCCTAATCTAACTCT-1_CRC0  | Epithelial cells type1 | 2530 |
| TGCCAAAGTCTTGTC-1_CRC0   | Epithelial cells type1 | 2593 |
| CTCGTCACATTAACCG-1_CRC0  | Epithelial cells type1 | 2060 |
| TGCTGCTTCTTACCGC-1_CRC0  | Epithelial cells type1 | 2031 |
| CGACCTTTCCAAAGTC-1_CRC0  | Epithelial cells type1 | 2557 |
| GTACTTTAGCTAGTCT-1_CRC0  | Epithelial cells type1 | 2568 |
| ACACCGGCATGGATGG-1_CRC0  | Epithelial cells type1 | 1770 |
| GTTTCATTAGTTAGCGG-1_CRC0 | Epithelial cells type1 | 1333 |
| CTTTGCGGTTTCGCTC-1_CRC0  | Epithelial cells type1 | 1613 |
| GGGACCTCAACGCACC-1_CRC0  | Epithelial cells type1 | 1465 |
| TTAGGCAGTTAGAACA-1_CRC0  | Epithelial cells type1 | 1438 |



|                          |                        |      |
|--------------------------|------------------------|------|
| CCGTTTCAGTCTACCTC-1_CRC0 | Epithelial cells type1 | 1638 |
| GAGTCCGTCTCGAGTA-1_CRC0  | Epithelial cells type1 | 1857 |
| GTGCATATCCACGAAT-1_CRC0  | Epithelial cells type1 | 2078 |
| TACTTGTCATGCATGT-1_CRC0  | Epithelial cells type1 | 2043 |
| CGTCCATCATTACCTT-1_CRC0  | Epithelial cells type1 | 1582 |
| CACCAGGCAGCCTATA-1_CRC0  | Epithelial cells type1 | 1745 |
| TCGTAGAGTCAGATAA-1_CRC0  | Epithelial cells type1 | 1992 |
| CGCTGGACAGCTGTGC-1_CRC0  | Epithelial cells type1 | 1300 |
| TGGTTAGCAATACGCT-1_CRC0  | Epithelial cells type1 | 2194 |
| CGTTAGAAGAGCCCAA-1_CRC0  | Epithelial cells type1 | 1920 |
| TGGTTAGCAAGTCTAC-1_CRC0  | Epithelial cells type1 | 1548 |
| CCTAGCTTCAAAGACA-1_CRC0  | Epithelial cells type1 | 2167 |
| GATCGATAGAGTCTGG-1_CRC0  | Epithelial cells type1 | 1771 |
| TGCCCTAAGTGATCGG-1_CRC0  | Epithelial cells type1 | 2118 |
| CGACCTTGTCTGATCA-1_CRC0  | Epithelial cells type1 | 1405 |
| CTTCTCTCAACGATGG-1_CRC0  | Epithelial cells type1 | 1654 |
| CGTCAGGTCTCGAGTA-1_CRC0  | Epithelial cells type1 | 2062 |
| TCGGGACCATGGATGG-1_CRC0  | Epithelial cells type1 | 2172 |
| TACGGGCGTCATCCCT-1_CRC0  | Epithelial cells type1 | 2329 |
| GGGATGAAGGGAACGG-1_CRC0  | Epithelial cells type1 | 1975 |
| ATCCGAAAGGAGTTGC-1_CRC0  | Epithelial cells type1 | 2305 |
| GGGTTGCTCCTATGTT-1_CRC0  | Epithelial cells type1 | 2223 |
| ATAGACCGTTAAAGTG-1_CRC0  | Epithelial cells type1 | 1858 |
| CACACCTCATGGTTGT-1_CRC0  | Epithelial cells type1 | 2161 |
| CAACTAGGTGGGTCAA-1_CRC0  | Epithelial cells type1 | 1527 |
| TGGACGCAGACCACGA-1_CRC0  | Epithelial cells type1 | 1789 |
| ATCTACTTCGCATGAT-1_CRC0  | Epithelial cells type1 | 1880 |
| CGTGTCTCACCCAGTG-1_CRC0  | Epithelial cells type1 | 1280 |
| TTCTCAAGTAACGCGA-1_CRC0  | Epithelial cells type1 | 1767 |
| CTAACTTTCTGCAGTA-1_CRC0  | Epithelial cells type1 | 1857 |
| TCATTACAGAATGTTG-1_CRC0  | Epithelial cells type1 | 1726 |
| AAATGCCCATAGTAAG-1_CRC0  | Epithelial cells type1 | 1916 |
| ACTGAGTGTGCGATCG-1_CRC0  | Epithelial cells type1 | 1774 |
| TACAGTGAGATGTAAC-1_CRC0  | Epithelial cells type1 | 1676 |
| TGGCGCATCCACTCCA-1_CRC0  | Epithelial cells type1 | 1712 |
| TTAGTTCTCCGTAGGC-1_CRC0  | Epithelial cells type1 | 1952 |
| CTCAGAACATCAGTAC-1_CRC0  | Epithelial cells type1 | 1675 |
| TATCAGGTCAACGGGA-1_CRC0  | Epithelial cells type1 | 1684 |
| ACCTTTAAGGGTGTTG-1_CRC0  | Epithelial cells type1 | 1949 |
| GCATACAGTTCAGGCC-1_CRC0  | Epithelial cells type1 | 1574 |
| CGTCCATAGAAGATTC-1_CRC0  | Epithelial cells type1 | 1602 |
| ACGGCCAAGTTGCAGG-1_CRC0  | Epithelial cells type1 | 2082 |
| GCATACAGTTCCATGA-1_CRC0  | Epithelial cells type1 | 1512 |
| GATGAAACAACGTGCTA-1_CRC0 | Epithelial cells type1 | 1487 |
| CAGTAACCACGGCCAT-1_CRC0  | Epithelial cells type1 | 1180 |
| TACACGACAGCATACT-1_CRC0  | Epithelial cells type1 | 1572 |
| CACACCTGTGCCTGTG-1_CRC0  | Epithelial cells type1 | 2127 |
| CACATAGCACAACGCC-1_CRC0  | Epithelial cells type1 | 2141 |
| CATGACAGTAGAGTGC-1_CRC0  | Epithelial cells type1 | 1829 |
| GTTTCTATCCCGGATG-1_CRC0  | Epithelial cells type1 | 1457 |
| ACCAGTACAGTCTTCC-1_CRC0  | Epithelial cells type1 | 1654 |

|                          |                        |      |
|--------------------------|------------------------|------|
| CTCGAAAGTTTGTGG-1_CRC0   | Epithelial cells type1 | 1334 |
| GTTAAGCGTGAGCGAT-1_CRC0  | Epithelial cells type1 | 2136 |
| TGGGCGTCAGCGTTCG-1_CRC0  | Epithelial cells type1 | 1886 |
| GCTTCCAGTCAAAGCG-1_CRC0  | Epithelial cells type1 | 1716 |
| ACATACGTCTGATACG-1_CRC0  | Epithelial cells type1 | 1690 |
| ACTGATGAGCGTAGTG-1_CRC0  | Epithelial cells type1 | 1425 |
| AGCGTATTCGACGGAA-1_CRC0  | Epithelial cells type1 | 1363 |
| ACTGATGGTCTTGTCC-1_CRC0  | Epithelial cells type1 | 1546 |
| CAGCTGGTCCTCTAGC-1_CRC0  | Epithelial cells type1 | 1610 |
| ACACCCTTCGGACAAG-1_CRC0  | Epithelial cells type1 | 1145 |
| CGCGGTAAGCTATGCT-1_CRC0  | Epithelial cells type1 | 1906 |
| AACTCCCGTCGAGATG-1_CRC0  | Epithelial cells type1 | 1527 |
| GACGGCTGTTGGGACA-1_CRC0  | Epithelial cells type1 | 1343 |
| GCTCTGTGTCCAATA-1_CRC0   | Epithelial cells type1 | 1555 |
| CCTACCAGTGTTGGGA-1_CRC0  | Epithelial cells type1 | 1404 |
| GGACAGAAGAGCCCAA-1_CRC0  | Epithelial cells type1 | 1691 |
| TTGGCAAAGGCCCGTT-1_CRC0  | Epithelial cells type1 | 1713 |
| CAGCTGGTCTTGAGAC-1_CRC0  | Epithelial cells type1 | 1769 |
| TCACAAGCAAGTAGTA-1_CRC0  | Epithelial cells type1 | 1576 |
| TGACGGCTCTGGCGAC-1_CRC0  | Epithelial cells type1 | 1545 |
| CGGTTAACACGAAATA-1_CRC0  | Epithelial cells type1 | 1577 |
| CTCGGGAAGGCATGTG-1_CRC0  | Epithelial cells type1 | 1738 |
| AGTTGGTGTAGCAAAT-1_CRC0  | Epithelial cells type1 | 2071 |
| CATCCACGTTGGAGGT-1_CRC0  | Epithelial cells type1 | 1965 |
| CCAATCCAGTGCATG-1_CRC0   | Epithelial cells type1 | 1523 |
| CTCTGGTGTGGCGAAT-1_CRC0  | Epithelial cells type1 | 1622 |
| GTCACAAAGTGCTGCC-1_CRC0  | Epithelial cells type1 | 1975 |
| CTCGAAATCTTTAGGG-1_CRC0  | Epithelial cells type1 | 1465 |
| TTTACTGCACGAAGCA-1_CRC0  | Epithelial cells type1 | 1271 |
| GCCTCTAAGCCTCGTG-1_CRC0  | Epithelial cells type1 | 2458 |
| GTTCATTTTCGTAGGTT-1_CRC0 | Epithelial cells type1 | 2640 |
| CGTGTAATCCGGCACA-1_CRC0  | Epithelial cells type1 | 2488 |
| AAAGCAAGTTATCACG-1_CRC0  | Epithelial cells type1 | 1953 |
| GAACCTACACGGTTTA-1_CRC0  | Epithelial cells type1 | 2146 |
| TCCCGATGTTATGCGT-1_CRC0  | Epithelial cells type1 | 1943 |
| TGGTTCAGTATTGGA-1_CRC0   | Epithelial cells type1 | 1923 |
| GTCTTCGAGAAGGGTA-1_CRC0  | Epithelial cells type1 | 1654 |
| AGCCTAAAGCGTTGCC-1_CRC0  | Epithelial cells type1 | 1768 |
| CCTAAAGGTCTAGTCA-1_CRC0  | Epithelial cells type1 | 2034 |
| TTGGAACAGGCATTGG-1_CRC0  | Epithelial cells type1 | 1978 |
| ACTGCTCCACATTCT-1_CRC0   | Epithelial cells type1 | 1862 |
| CTGATCCTCAGCGACC-1_CRC0  | Epithelial cells type1 | 1952 |
| TTCGGTCGTGTTTGGT-1_CRC0  | Epithelial cells type1 | 1844 |
| ATCATCTAGACGCACA-1_CRC0  | Epithelial cells type1 | 1687 |
| GTAACGTAGTGACCT-1_CRC0   | Epithelial cells type1 | 1901 |
| ATCATCTAGGATCGCA-1_CRC0  | Epithelial cells type1 | 1764 |
| CGGACACCACAGGCCT-1_CRC0  | Epithelial cells type1 | 1857 |
| CGAGCACGTCGAGTTT-1_CRC0  | Epithelial cells type1 | 1401 |
| TAAGCGTAGCGTGAAC-1_CRC0  | Epithelial cells type1 | 2289 |
| CCGTACTGTGCAAAGC-1_CRC0  | Epithelial cells type1 | 1995 |
| ACTGAGTAGAAACGCC-1_CRC0  | Epithelial cells type1 | 2199 |

|                         |                        |      |
|-------------------------|------------------------|------|
| GCTCCTAGTGACTACT-1_CRC0 | Epithelial cells type1 | 2212 |
| CGAACATTCTACCTGC-1_CRC0 | Epithelial cells type1 | 1939 |
| TCTGAGATCGTGAGT-1_CRC0  | Epithelial cells type1 | 1980 |
| CACACCTGTGCACTTA-1_CRC0 | Epithelial cells type1 | 2461 |
| TGGCTGGCATCGATTG-1_CRC0 | Epithelial cells type1 | 2648 |
| TTAACTCTCGAACTGT-1_CRC0 | Epithelial cells type1 | 1994 |
| GCATGCGGTTTGCATG-1_CRC0 | Epithelial cells type1 | 2003 |
| GAGCAGACAAACGCGA-1_CRC0 | Epithelial cells type1 | 1513 |
| TGGCGCACATTATCTC-1_CRC0 | Epithelial cells type1 | 1910 |
| AAAGCAATCGCCAAAT-1_CRC0 | Epithelial cells type1 | 2492 |
| GCAATCATCATGGTCA-1_CRC0 | Epithelial cells type1 | 1898 |
| TGACGGCCACCGTTGG-1_CRC0 | Epithelial cells type1 | 2271 |
| CGCTGGAGTGACGCCT-1_CRC0 | Epithelial cells type1 | 2158 |
| GGACAGAAGCGTTCCG-1_CRC0 | Epithelial cells type1 | 1785 |
| CCCAATCCATCCTAGA-1_CRC0 | Epithelial cells type1 | 1987 |
| ACACCGGCAGCCTTTC-1_CRC0 | Epithelial cells type1 | 1733 |
| CGAATGTCATGCAACT-1_CRC0 | Epithelial cells type1 | 2078 |
| CCGTTCACACATTAGC-1_CRC0 | Epithelial cells type1 | 1595 |
| GCGACCAGTTCAACCA-1_CRC0 | Epithelial cells type1 | 1884 |
| TGGCCAGCAGAGTGTG-1_CRC0 | Epithelial cells type1 | 1807 |
| CGATCGGTCCTACAGA-1_CRC0 | Epithelial cells type1 | 1571 |
| TTTCCTCAGTGGGATC-1_CRC0 | Epithelial cells type1 | 1727 |
| CGAGCCAAGTCGAGTG-1_CRC0 | Epithelial cells type1 | 1739 |
| TGCCCATCACGGTAAG-1_CRC0 | Epithelial cells type1 | 2544 |
| CTACATTCAATGGATA-1_CRC0 | Epithelial cells type1 | 2241 |
| ACGGAGAGTACACCGC-1_CRC0 | Epithelial cells type1 | 1897 |
| ACTTTCAAGCCCAACC-1_CRC0 | Epithelial cells type1 | 1683 |
| ATAGACCAGCGACGTA-1_CRC0 | Epithelial cells type1 | 1621 |
| CAGGTGCTCTGCTGCT-1_CRC0 | Epithelial cells type1 | 1697 |
| CATGACAGTTGCGCAC-1_CRC0 | Epithelial cells type1 | 1877 |
| AAACCTGAGGTGATAT-1_CRC0 | Epithelial cells type1 | 1672 |
| CACTCCAGTCGCTTTC-1_CRC0 | Epithelial cells type1 | 1709 |
| CCTACCAAGAACAATC-1_CRC0 | Epithelial cells type1 | 2502 |
| TAGGCATTCTCATTCA-1_CRC0 | Epithelial cells type1 | 2240 |
| GTGCAGCGTTCCACTC-1_CRC0 | Epithelial cells type1 | 1903 |
| TGACTTTCAAAGTCAA-1_CRC0 | Epithelial cells type1 | 1846 |
| TAAGTGCGTCCGTCAG-1_CRC0 | Epithelial cells type1 | 2299 |
| AGGTCCGCAGCGATCC-1_CRC0 | Epithelial cells type1 | 1918 |
| CGACTTCGTTTGTTC-1_CRC0  | Epithelial cells type1 | 1912 |
| ATCACGAAGAAGATTC-1_CRC0 | Epithelial cells type1 | 1914 |
| TGTGGTACAGTTCCCT-1_CRC0 | Epithelial cells type1 | 1977 |
| ATCCACCAGACTACAA-1_CRC0 | Epithelial cells type1 | 1704 |
| CGCGGTACACTTCGAA-1_CRC0 | Epithelial cells type1 | 1984 |
| TATCTCAGTCATATCG-1_CRC0 | Epithelial cells type1 | 1692 |
| TCAGCAAGTAGAGTGC-1_CRC0 | Epithelial cells type1 | 1633 |
| TGAGAGGGTAGGAGTC-1_CRC0 | Epithelial cells type1 | 1890 |
| CAGGTGCAGTAATCCC-1_CRC0 | Epithelial cells type1 | 1234 |
| TCAGGTAAGCTACCGC-1_CRC0 | Epithelial cells type1 | 1987 |
| CCATGTCAGCCTCGTG-1_CRC0 | Epithelial cells type1 | 1787 |
| ACGCAGCAGGTCATCT-1_CRC0 | Epithelial cells type1 | 1967 |
| CGTGTAATCCTTTACA-1_CRC0 | Epithelial cells type1 | 1999 |

|                          |                        |      |
|--------------------------|------------------------|------|
| GATCGCGTCGCATGGC-1_CRC0  | Epithelial cells type1 | 2143 |
| GTTAAGCAGGGCTTGA-1_CRC0  | Epithelial cells type1 | 1649 |
| GTCCTCACATTAGCCA-1_CRC0  | Epithelial cells type1 | 1566 |
| AACTCAGAGCTAAACA-1_CRC0  | Epithelial cells type1 | 1851 |
| TGAGAGGAGCTAACAA-1_CRC0  | Epithelial cells type1 | 1660 |
| CGGAGCTAGACGACGT-1_CRC0  | Epithelial cells type1 | 2319 |
| GTTACAGCACTTGGAT-1_CRC0  | Epithelial cells type1 | 1780 |
| ACATCAGCATGTCCTC-1_CRC0  | Epithelial cells type1 | 1255 |
| AGGCCGTGTGCGCATAT-1_CRC0 | Epithelial cells type1 | 1500 |
| CATATGGGTCCAGTAT-1_CRC0  | Epithelial cells type1 | 1859 |
| AGCCTAAAGGCATGGT-1_CRC0  | Epithelial cells type1 | 2183 |
| CCCTCCTAGCCACGCT-1_CRC0  | Epithelial cells type1 | 2475 |
| GCCAAATAGGCTCATT-1_CRC0  | Epithelial cells type1 | 2160 |
| TACCTATCATGCCCGA-1_CRC0  | Epithelial cells type1 | 2102 |
| CTTAGGACATAGTAAG-1_CRC0  | Epithelial cells type1 | 2538 |
| TACGGATGTGATAAGT-1_CRC0  | Epithelial cells type1 | 1336 |
| GTTTCTAGTTAAGACA-1_CRC0  | Epithelial cells type1 | 2548 |
| TGAGCATGTTTCAGACT-1_CRC0 | Epithelial cells type1 | 2300 |
| AGCTCTCAGTTGTCGT-1_CRC0  | Epithelial cells type1 | 1632 |
| TGGTTAGCAACTGGCC-1_CRC0  | Epithelial cells type1 | 2159 |
| TAGAGCTAGGACAGCT-1_CRC0  | Epithelial cells type1 | 1833 |
| ACTTTCATCTTGAGAC-1_CRC0  | Epithelial cells type1 | 1757 |
| ATTCTACCACCGATAT-1_CRC0  | Epithelial cells type1 | 1863 |
| CTAAGACCAAAGGCGT-1_CRC0  | Epithelial cells type1 | 2138 |
| GAGGTGAGTTTGTGG-1_CRC0   | Epithelial cells type1 | 1918 |
| CCTTTCTCACATTTCT-1_CRC0  | Epithelial cells type1 | 1916 |
| CGCGTTTTCCAAGTA-1_CRC0   | Epithelial cells type1 | 1904 |
| TTGAACGCAGTCGTGC-1_CRC0  | Epithelial cells type1 | 2353 |
| GGCGACTTCGTTACAG-1_CRC0  | Epithelial cells type1 | 1711 |
| TCTGGAACATTTTCAGG-1_CRC0 | Epithelial cells type1 | 1668 |
| TGGGAAGCAATAGAGT-1_CRC0  | Epithelial cells type1 | 1539 |
| TTCTTAGAGCCTTGAT-1_CRC0  | Epithelial cells type1 | 1873 |
| AACCATGGTCTAGTCA-1_CRC0  | Epithelial cells type1 | 1678 |
| TGTATTCTCGAATGGG-1_CRC0  | Epithelial cells type1 | 1561 |
| AACTCCCTCATCGCTC-1_CRC0  | Epithelial cells type1 | 1901 |
| TGCCCATTCACTATTC-1_CRC0  | Epithelial cells type1 | 2438 |
| TACCTTATCCCTAATT-1_CRC0  | Epithelial cells type1 | 2393 |
| CCACGGATCCCGACTT-1_CRC0  | Epithelial cells type1 | 1667 |
| GTCACGGCATGTTCCC-1_CRC0  | Epithelial cells type1 | 2260 |
| TGCACCTGTCTGGTCG-1_CRC0  | Epithelial cells type1 | 2097 |
| TGGCTGGGTCATATGC-1_CRC0  | Epithelial cells type1 | 1493 |
| CTAGCCTTCTCTAGGA-1_CRC0  | Epithelial cells type1 | 2061 |
| TCGTACCCACGAGAGT-1_CRC0  | Epithelial cells type1 | 1924 |
| ACACCAAGTTCGGGCT-1_CRC0  | Epithelial cells type1 | 2184 |
| AGCTCCTGTCTCATCC-1_CRC0  | Epithelial cells type1 | 1822 |
| CACCTTGCATCACAAC-1_CRC0  | Epithelial cells type1 | 2393 |
| GACGTGCGTCAAACCTC-1_CRC0 | Epithelial cells type1 | 1846 |
| TGAAAGAAGAGTGAGA-1_CRC0  | Epithelial cells type1 | 1924 |
| GCTTCCACAAGTCATC-1_CRC0  | Epithelial cells type1 | 2725 |
| CTCGAGGAGGTACTCT-1_CRC0  | Epithelial cells type1 | 2107 |
| TCTATTGTCTACCAGA-1_CRC0  | Epithelial cells type1 | 2260 |

|                          |                        |      |
|--------------------------|------------------------|------|
| TTATGCTCATCCGTGG-1_CRC0  | Epithelial cells type1 | 2341 |
| CTGATAGGTCAGCTAT-1_CRC0  | Epithelial cells type1 | 1774 |
| AAACCTGGTGCAACTT-1_CRC0  | Epithelial cells type1 | 1815 |
| AGCTCCTTCGGATGGA-1_CRC0  | Epithelial cells type1 | 2018 |
| ACGCAGCCAACACCCG-1_CRC0  | Epithelial cells type1 | 2175 |
| TTGACTTAGCGATTCT-1_CRC0  | Epithelial cells type1 | 1783 |
| TTATGCTCAACACCTA-1_CRC0  | Epithelial cells type1 | 2235 |
| CAGTAACAGGATATAC-1_CRC0  | Epithelial cells type1 | 2235 |
| TATCTCATCTGTCAAG-1_CRC0  | Epithelial cells type1 | 2258 |
| CGGACACTCACGGTTA-1_CRC0  | Epithelial cells type1 | 2321 |
| CGGCTAGGTGCTGTAT-1_CRC0  | Epithelial cells type1 | 1991 |
| CTCTACGGTGTAAAGA-1_CRC0  | Epithelial cells type1 | 1721 |
| GACAGAGCATTCTCAT-1_CRC0  | Epithelial cells type1 | 2217 |
| GGAGCAAAGTTAAGTG-1_CRC0  | Epithelial cells type1 | 2482 |
| CCCATACGTATGGTTC-1_CRC0  | Epithelial cells type1 | 2280 |
| TCTATTGAGAGTACAT-1_CRC0  | Epithelial cells type1 | 2109 |
| AGCGTCGAGTGGTAAT-1_CRC0  | Epithelial cells type1 | 1865 |
| GTCACGGAGCCAGTTT-1_CRC0  | Epithelial cells type1 | 1570 |
| TGCCAAAGTAGCTAAA-1_CRC0  | Epithelial cells type1 | 1800 |
| ACTGTCCCATTAACCG-1_CRC0  | Epithelial cells type1 | 1757 |
| GCTCCTATCACGACTA-1_CRC0  | Epithelial cells type1 | 1579 |
| TCCACACTCCTGTAGA-1_CRC0  | Epithelial cells type1 | 1424 |
| GTCACAAGTGGTAACG-1_CRC0  | Epithelial cells type1 | 1570 |
| GACAGAGCACATGGGA-1_CRC0  | Epithelial cells type1 | 1485 |
| TGTATTTCGTCGAAAGC-1_CRC0 | Epithelial cells type1 | 1302 |
| CTACCCATCTTGAGGT-1_CRC0  | Epithelial cells type1 | 1018 |
| TACTCGCTCCCGACTT-1_CRC0  | Epithelial cells type1 | 1237 |
| GTCGGGTGTGCTTCTC-1_CRC0  | Epithelial cells type1 | 1407 |
| CCGGGATGTTCTCCA-1_CRC0   | Epithelial cells type1 | 1201 |
| TCTTTCCGTAGCTAAA-1_CRC0  | Epithelial cells type1 | 1915 |
| CGTCACTGTTGAAGTC-1_CRC0  | Epithelial cells type1 | 1360 |
| GGGAATGAGCCAGAAC-1_CRC0  | Epithelial cells type1 | 1441 |
| GTGCATATCAACGAAA-1_CRC0  | Epithelial cells type1 | 1639 |
| AGTGAGGAGTATTGGA-1_CRC0  | Epithelial cells type1 | 1421 |
| CCTTCCCCACTTCTGC-1_CRC0  | Epithelial cells type1 | 1012 |
| ACGATGTAGCGTTTAC-1_CRC0  | Epithelial cells type1 | 1562 |
| TGAGCATAGGCCCTTG-1_CRC0  | Epithelial cells type1 | 1451 |
| CGACCTTTCTTGTATC-1_CRC0  | Epithelial cells type1 | 1057 |
| TTAGTTCCAAGCTGAG-1_CRC0  | Epithelial cells type1 | 1427 |
| GAACATCCACGGTTTA-1_CRC0  | Epithelial cells type1 | 1306 |
| ACGGCCAAGACCCACC-1_CRC0  | Epithelial cells type1 | 1402 |
| GTGCGGTCATCCCATC-1_CRC0  | Epithelial cells type1 | 1007 |
| TCAGGATAGCCACTAT-1_CRC0  | Epithelial cells type1 | 1472 |
| TTTCCTCTCACTTCAT-1_CRC0  | Epithelial cells type1 | 1250 |
| AAAGTAGTCCTCAATT-1_CRC0  | Epithelial cells type1 | 1249 |
| TTTACTGTCACCTTCAT-1_CRC0 | Epithelial cells type1 | 1501 |
| CAGAATCCAGCGTTCG-1_CRC0  | Epithelial cells type1 | 413  |
| CTGAAGTAGCCAACAG-1_CRC0  | Epithelial cells type1 | 1347 |
| TCAGGATGTGGTAACG-1_CRC0  | Epithelial cells type1 | 763  |
| CATGCCTCATATACGC-1_CRC0  | Epithelial cells type1 | 1698 |
| CTCGTACAGTTGCAGG-1_CRC0  | Epithelial cells type1 | 1901 |

|                         |                        |      |
|-------------------------|------------------------|------|
| CATCGAACAATCAGAA-1_CRC0 | Epithelial cells type1 | 1633 |
| CGAGAAGCATCGACGC-1_CRC0 | Epithelial cells type1 | 1983 |
| TTAGTTCGTGGTTTCA-1_CRC0 | Epithelial cells type1 | 1382 |
| TGCGGGTCAAACGTGC-1_CRC0 | Epithelial cells type1 | 1377 |
| GATTCAGTCTTACCTA-1_CRC0 | Epithelial cells type1 | 1862 |
| TCAGGTAAGCCACGCT-1_CRC0 | Epithelial cells type1 | 1321 |
| GAGCAGACAGTACACT-1_CRC0 | Epithelial cells type1 | 1707 |
| TGCGCAGCAAGAGTCG-1_CRC0 | Epithelial cells type1 | 1503 |
| CTCGGGATCGGCGGTT-1_CRC0 | Epithelial cells type1 | 1617 |
| AATCGGTAGTGACATA-1_CRC0 | Epithelial cells type1 | 1814 |
| GTCAAGTAGTATCGAA-1_CRC0 | Epithelial cells type1 | 1535 |
| CATCAGAAGCCACGTC-1_CRC0 | Epithelial cells type1 | 1857 |
| CCTTCCCCTCGAGTTT-1_CRC0 | Epithelial cells type1 | 1645 |
| ACGTCAAGTGGTACAG-1_CRC0 | Epithelial cells type1 | 1923 |
| CGTGAGCGTGAGGGTT-1_CRC0 | Epithelial cells type1 | 2575 |
| ATTGGACCAACACCCG-1_CRC0 | Epithelial cells type1 | 2847 |
| CCAATCCGTTCGGGCT-1_CRC0 | Epithelial cells type1 | 1527 |
| CACACTCAGCGGATCA-1_CRC0 | Epithelial cells type1 | 1520 |
| TGACGGCGTCCGAATT-1_CRC0 | Epithelial cells type1 | 1432 |
| AGAATAGGTCTTGTCC-1_CRC0 | Epithelial cells type1 | 2298 |
| CAGTAACAGTTACGGG-1_CRC0 | Epithelial cells type1 | 2482 |
| CCTTACGCACTTCGAA-1_CRC0 | Epithelial cells type1 | 1477 |
| GTTTCTACAAGTTCTG-1_CRC0 | Epithelial cells type1 | 1332 |
| TTTATGCGTTCCTCCA-1_CRC0 | Epithelial cells type1 | 1514 |
| GTTCTCGGTGATGTCT-1_CRC0 | Epithelial cells type1 | 1248 |
| TACGGGCTCGTATCAG-1_CRC0 | Epithelial cells type1 | 1173 |
| AGCTCCTAGAAACCGC-1_CRC0 | Epithelial cells type1 | 1822 |
| AGACGTTAGATGTAAC-1_CRC0 | Epithelial cells type1 | 1720 |
| CTCACACAGAAGCCCA-1_CRC0 | Epithelial cells type1 | 2119 |
| TGACAACCAATGGAAT-1_CRC0 | Epithelial cells type1 | 1729 |
| CTGCGGACAGATCGGA-1_CRC0 | Epithelial cells type1 | 1455 |
| CAAGTTGTCCGCAAGC-1_CRC0 | Epithelial cells type1 | 1220 |
| ACGTCAAGTAAAGGAG-1_CRC0 | Epithelial cells type1 | 1678 |
| CAGGTGCGTATCTGCA-1_CRC0 | Epithelial cells type1 | 1606 |
| ATCTACTAGCGACGTA-1_CRC0 | Epithelial cells type1 | 2074 |
| TACGGATGTAAATGTG-1_CRC0 | Epithelial cells type1 | 1795 |
| ACTTACTGTCACCTAA-1_CRC0 | Epithelial cells type1 | 1357 |
| GTGCGGTCAAACCTAC-1_CRC0 | Epithelial cells type1 | 1330 |
| TCGCGAGGTAAATACG-1_CRC0 | Epithelial cells type1 | 1128 |
| GCTCCTACATGGGAAC-1_CRC0 | Epithelial cells type1 | 1005 |
| TTTATGCAGTCCGTAT-1_CRC0 | Epithelial cells type1 | 864  |
| ATCCACCTCGTTACGA-1_CRC0 | Epithelial cells type1 | 1532 |
| GTCAAGTTCCAACCAA-1_CRC0 | Epithelial cells type1 | 1460 |
| AGTCTTTAGACTAGAT-1_CRC0 | Epithelial cells type1 | 1446 |
| TTGTAGGGTGGCCCTA-1_CRC0 | Epithelial cells type1 | 1407 |
| AGACGTTAGACGACGT-1_CRC0 | Epithelial cells type1 | 1384 |
| GCAGTTAGTTGAACTC-1_CRC0 | Epithelial cells type1 | 1186 |
| GATTCAGTCTCGCTTG-1_CRC0 | Epithelial cells type1 | 2411 |
| GGTGCGTTCCTGCCAT-1_CRC0 | Epithelial cells type1 | 2325 |
| TAAGTGCAGTACGATA-1_CRC0 | Epithelial cells type1 | 1485 |
| TGGCGCAAGAATTGTG-1_CRC0 | Epithelial cells type1 | 2381 |

|                          |                        |      |
|--------------------------|------------------------|------|
| TTTGCGCAGACGACGT-1_CRC0  | Epithelial cells type1 | 2631 |
| ACGGAGATCACAAATGC-1_CRC0 | Epithelial cells type1 | 1537 |
| GTTCTCGAGAAACGCC-1_CRC0  | Epithelial cells type1 | 1895 |
| CCAATCCCAGACACTT-1_CRC0  | Epithelial cells type1 | 1120 |
| GTGCTTCCAGACGCCT-1_CRC0  | Epithelial cells type1 | 1026 |
| GATGCTACATAAGACA-1_CRC0  | Epithelial cells type1 | 1461 |
| TAAGTGCAGGAGCGAG-1_CRC0  | Epithelial cells type1 | 1832 |
| AGGGAGTCAACGATCT-1_CRC0  | Epithelial cells type1 | 2009 |
| CCTTCCCAGCTAGGCA-1_CRC0  | Epithelial cells type1 | 1982 |
| CCTACCAGTGCAGTAG-1_CRC0  | Epithelial cells type1 | 2047 |
| CTGCCTATCCGCAAGC-1_CRC0  | Epithelial cells type1 | 1899 |
| GGGTCTGTCTTAGCCC-1_CRC0  | Epithelial cells type1 | 1576 |
| AAATGCCACCTATCC-1_CRC0   | Epithelial cells type1 | 1857 |
| GCTGCGAAGCATGGCA-1_CRC0  | Epithelial cells type1 | 1265 |
| AAGTCTGCTACTAAGTC-1_CRC0 | Epithelial cells type1 | 1389 |
| CTGTTTATCTGAGGGA-1_CRC0  | Epithelial cells type1 | 1647 |
| GTATTCTCAGTGACAG-1_CRC0  | Epithelial cells type1 | 1679 |
| GATGAGGAGCGATATA-1_CRC0  | Epithelial cells type1 | 1109 |
| GGACAAGAGCTCCTCT-1_CRC0  | Epithelial cells type1 | 1384 |
| AACACGTGTTCTGGTA-1_CRC0  | Epithelial cells type1 | 1175 |
| GCGAGAACAGATCCAT-1_CRC0  | Epithelial cells type1 | 1538 |
| TCTGAGATCATGCTCC-1_CRC0  | Epithelial cells type1 | 1914 |
| GACTGCGCATTAGGCT-1_CRC0  | Epithelial cells type1 | 1590 |
| AAGTCTGAGGTAGCCA-1_CRC0  | Epithelial cells type1 | 1129 |
| GTCGGGTAGGGAACGG-1_CRC0  | Epithelial cells type1 | 1107 |
| GTCAAGTTCTGAGGGA-1_CRC0  | Epithelial cells type1 | 1499 |
| ATCATGGAGGAGTTGC-1_CRC0  | Epithelial cells type1 | 1097 |
| CGAGCCACAGAAGCAC-1_CRC0  | Epithelial cells type1 | 1210 |
| GTACGTACAGCTGGCT-1_CRC0  | Epithelial cells type1 | 1441 |
| GAATAAGGTGTGCGTC-1_CRC0  | Epithelial cells type1 | 1232 |
| CTCACACTCTGGTATG-1_CRC0  | Epithelial cells type1 | 1814 |
| CTTACCGAGGTACTCT-1_CRC0  | Epithelial cells type1 | 1623 |
| TAAGCGTAGCCAACAG-1_CRC0  | Epithelial cells type1 | 1530 |
| GCGAGAAGTATGCTTG-1_CRC0  | Epithelial cells type1 | 1184 |
| TCTTCGGTCAGCTGGC-1_CRC0  | Epithelial cells type1 | 1340 |
| GCTGCGAAGAGTACCG-1_CRC0  | Epithelial cells type1 | 1152 |
| AACACGTCATGGTTGT-1_CRC0  | Epithelial cells type1 | 868  |
| TCGCGAGGTTGTGCGG-1_CRC0  | Epithelial cells type1 | 1306 |
| CACACAACAAGGCTCC-1_CRC0  | Epithelial cells type1 | 1558 |
| TTTCTCCAGCTCGCA-1_CRC0   | Epithelial cells type1 | 1642 |
| CCTTACGTGCGAGCAA-1_CRC0  | Epithelial cells type1 | 1118 |
| TCCACACTCCTCCTAG-1_CRC0  | Epithelial cells type1 | 693  |
| TGCTGCTTCTGTTGAG-1_CRC0  | Epithelial cells type1 | 1289 |
| GTCATTTAGTTAGGTA-1_CRC0  | Epithelial cells type1 | 878  |
| CAGGTGCAGGTGCTTT-1_CRC0  | Epithelial cells type1 | 1108 |
| TAGTTGGTCCTTGCCA-1_CRC0  | Epithelial cells type1 | 1074 |
| AAGACCTTCAGCCTAA-1_CRC0  | Epithelial cells type1 | 1584 |
| ATCATGGGTACTCTCC-1_CRC0  | Epithelial cells type1 | 1650 |
| GGGATGAGTCAGAATA-1_CRC0  | Epithelial cells type1 | 1327 |
| CCAATCAGAGATGAG-1_CRC0   | Epithelial cells type1 | 1409 |
| ACTGTCCCACGTAAGG-1_CRC0  | Epithelial cells type1 | 1096 |

|                          |                        |      |
|--------------------------|------------------------|------|
| CTTACCGAGCTCCCAG-1_CRC0  | Epithelial cells type1 | 1142 |
| GTTTCTAAGTCCCACG-1_CRC0  | Epithelial cells type1 | 1140 |
| GTCCTCACATGGGAAC-1_CRC0  | Epithelial cells type1 | 1359 |
| CGCGGTAGTAAGTTCC-1_CRC0  | Epithelial cells type1 | 1129 |
| GGGAATGCATAAGACA-1_CRC0  | Epithelial cells type1 | 1442 |
| CCTAGCTGTTGTCGCG-1_CRC0  | Epithelial cells type1 | 2369 |
| TTCTCCTGTCTGATCA-1_CRC0  | Epithelial cells type1 | 2692 |
| AAGTCTGTCCTTTCTC-1_CRC0  | Epithelial cells type1 | 2434 |
| GATTCAGGTAGGGTAC-1_CRC0  | Epithelial cells type1 | 2144 |
| CTACGTCGTGTCGCTG-1_CRC0  | Epithelial cells type1 | 3000 |
| CTGCCTAAGTCATCCA-1_CRC0  | Epithelial cells type1 | 1725 |
| CCACCTACACGCCAGT-1_CRC0  | Epithelial cells type1 | 2086 |
| CTGATAGGTGTAACGG-1_CRC0  | Epithelial cells type1 | 1358 |
| TACTCGCAGTACACCT-1_CRC0  | Epithelial cells type1 | 1771 |
| CGCTATCTCAAACGGG-1_CRC0  | Epithelial cells type1 | 2182 |
| TGTTCCGCAAACGTGG-1_CRC0  | Epithelial cells type1 | 2183 |
| TTCTCAAAGGTACTCT-1_CRC0  | Epithelial cells type1 | 1260 |
| GATTCAGCACGAAGCA-1_CRC0  | Epithelial cells type1 | 1341 |
| CGTTAGATCTCCTATA-1_CRC0  | Epithelial cells type1 | 1558 |
| GCGCCAATCATGCTCC-1_CRC0  | Epithelial cells type1 | 1919 |
| GTGGGTCAGGCCGAAT-1_CRC0  | Epithelial cells type1 | 1555 |
| CAGCAGCAGTCACGCC-1_CRC0  | Epithelial cells type1 | 1540 |
| CTCTAATGTACCGTAT-1_CRC0  | Epithelial cells type1 | 1337 |
| ACACCGGGTTACGCGC-1_CRC0  | Epithelial cells type1 | 1573 |
| CATCAAGCAATTCCTT-1_CRC0  | Epithelial cells type1 | 1529 |
| CATCGGGCAGCCTATA-1_CRC0  | Epithelial cells type1 | 1892 |
| CGATGGCGTGGTGTAG-1_CRC0  | Epithelial cells type1 | 1294 |
| CGTGTAAGTCTTGCGG-1_CRC0  | Epithelial cells type1 | 1522 |
| CCGTTACATTACGAC-1_CRC0   | Epithelial cells type1 | 2239 |
| ACCCACTTCTGATTCT-1_CRC0  | Epithelial cells type1 | 2035 |
| GACTAACAGGCTCATT-1_CRC0  | Epithelial cells type1 | 2356 |
| AAACGGGGTTGGTAAA-1_CRC0  | Epithelial cells type1 | 2629 |
| GGAATAATCAGCGACC-1_CRC0  | Epithelial cells type1 | 2014 |
| AGGCCGTTCCAAATGC-1_CRC0  | Epithelial cells type1 | 1920 |
| CCTTACGTCTCGTATT-1_CRC0  | Epithelial cells type1 | 2340 |
| GCGCGATTTCGTAGATC-1_CRC0 | Epithelial cells type1 | 1631 |
| TACTCATTCGCCTGTT-1_CRC0  | Epithelial cells type1 | 1852 |
| CCGTGGAAGGTGCAAC-1_CRC0  | Epithelial cells type1 | 1479 |
| CTCGTACTCAGCTTAG-1_CRC0  | Epithelial cells type1 | 1838 |
| TATCTCATCTTGCAAG-1_CRC0  | Epithelial cells type1 | 2406 |
| GACAGAGTCAGAGCTT-1_CRC0  | Epithelial cells type1 | 1702 |
| TTAGGACTCTCAAACG-1_CRC0  | Epithelial cells type1 | 1908 |
| ACACCCTTCAAAGTAG-1_CRC0  | Epithelial cells type1 | 2280 |
| TAGTTGGGTTACGGC-1_CRC0   | Epithelial cells type1 | 2348 |
| GTACGTACAACCTTGAC-1_CRC0 | Epithelial cells type1 | 1726 |
| GTTTCGGGTCACATACG-1_CRC0 | Epithelial cells type1 | 1828 |
| AGCGTATCAACGATCT-1_CRC0  | Epithelial cells type1 | 1384 |
| TAGAGCTCATCCTAGA-1_CRC0  | Epithelial cells type1 | 1782 |
| GGAATAAACACTTACGA-1_CRC0 | Epithelial cells type1 | 2242 |
| CTAAGACTCTCCCTGA-1_CRC0  | Epithelial cells type1 | 1817 |
| TACTTACCACAGATTC-1_CRC0  | Epithelial cells type1 | 1778 |



|                          |                        |      |
|--------------------------|------------------------|------|
| ATGTGTGCACACCGAC-1_CRC0  | Epithelial cells type1 | 1927 |
| GTAACGTCATCGTCGG-1_CRC0  | Epithelial cells type1 | 2255 |
| CCTTCCCGTAAATGTG-1_CRC0  | Epithelial cells type1 | 2275 |
| ACAGCTAGTTTGCATG-1_CRC0  | Epithelial cells type1 | 1964 |
| GCGACCAAGATCCGAG-1_CRC0  | Epithelial cells type1 | 2038 |
| GTGGGTCCACATCCGG-1_CRC0  | Epithelial cells type1 | 2572 |
| CCTACACAGAACTGTA-1_CRC0  | Epithelial cells type1 | 2588 |
| GTAGGCCCAAATTGCC-1_CRC0  | Epithelial cells type1 | 2157 |
| GAACGGATCATGTCCC-1_CRC0  | Epithelial cells type1 | 1578 |
| TGGTTCGGTTTACTCT-1_CRC0  | Epithelial cells type1 | 2030 |
| CTACGTCTCCGAATGT-1_CRC0  | Epithelial cells type1 | 1316 |
| CTCGTACCAATGGAAT-1_CRC0  | Epithelial cells type1 | 1528 |
| ACTGAACAGACTGGGT-1_CRC0  | Epithelial cells type1 | 1544 |
| TAAGCGTCATGGTTGT-1_CRC0  | Epithelial cells type1 | 1315 |
| CAAGGCCAGAGAACAG-1_CRC0  | Epithelial cells type1 | 1208 |
| TATCAGGGTCAGAAGC-1_CRC0  | Epithelial cells type1 | 1505 |
| GATGAGGGTTCATGGT-1_CRC0  | Epithelial cells type1 | 1450 |
| ATCCGAATCAGTTAGC-1_CRC0  | Epithelial cells type1 | 1943 |
| GGAATGAGGTTCTTA-1_CRC0   | Epithelial cells type1 | 1525 |
| CAGTAACGTCACAAGG-1_CRC0  | Epithelial cells type1 | 1751 |
| CTACATTCATGACGGA-1_CRC0  | Epithelial cells type1 | 2018 |
| GGATTACAGGACATTA-1_CRC0  | Epithelial cells type1 | 2266 |
| TCAATCTTCCACTCCA-1_CRC0  | Epithelial cells type1 | 1809 |
| AGCGTATCACGGCTAC-1_CRC0  | Epithelial cells type1 | 1775 |
| AGTCTTTGTCTCTTTA-1_CRC0  | Epithelial cells type1 | 2086 |
| CTAAGACCAAGCCGCT-1_CRC0  | Epithelial cells type1 | 1621 |
| GATCAGTGTGCGATCG-1_CRC0  | Epithelial cells type1 | 1617 |
| TATGCCCGTTCTCTCA-1_CRC0  | Epithelial cells type1 | 1373 |
| ACTGAACTCAACACTG-1_CRC0  | Epithelial cells type1 | 1814 |
| TACACGAGTTATCACG-1_CRC0  | Epithelial cells type1 | 1548 |
| AATCCAGAGTTCGCAT-1_CRC0  | Epithelial cells type1 | 1581 |
| TCTTCGGTCCATGAGT-1_CRC0  | Epithelial cells type1 | 1311 |
| CGGAGCTCATCACGTA-1_CRC0  | Epithelial cells type1 | 1720 |
| GACCTGGCATGAGCGA-1_CRC0  | Epithelial cells type1 | 1389 |
| TGGGAAGAGTCTCCTC-1_CRC0  | Epithelial cells type1 | 1857 |
| ATGCGATGTACAGTGG-1_CRC0  | Epithelial cells type1 | 1517 |
| TAGCCGGAGCTGTCTA-1_CRC0  | Epithelial cells type1 | 1804 |
| AAACCTGAGTACACCT-1_CRC0  | Epithelial cells type1 | 2095 |
| GGTGCGTTCAGCGACC-1_CRC0  | Epithelial cells type1 | 2190 |
| GGACAGATCGAATGCT-1_CRC0  | Epithelial cells type1 | 2212 |
| TAAGAGAGTACCGAGA-1_CRC0  | Epithelial cells type1 | 2008 |
| GTTTCGGGCATGGTCAT-1_CRC0 | Epithelial cells type1 | 1667 |
| TGCGTGGGTAGGGTAC-1_CRC0  | Epithelial cells type1 | 1692 |
| TTTGCGCTCTTGACGA-1_CRC0  | Epithelial cells type1 | 1823 |
| CATGACACATGACGGA-1_CRC0  | Epithelial cells type1 | 1888 |
| TGTGGTAAGAAACGAG-1_CRC0  | Epithelial cells type1 | 1996 |
| CGCTTCACAGACAAGC-1_CRC0  | Epithelial cells type1 | 1972 |
| CGGTAAAGCTAGGCA-1_CRC0   | Epithelial cells type1 | 1744 |
| ACACCCTAGCGCCTCA-1_CRC0  | Epithelial cells type1 | 1782 |
| TCATTTGTCTTACCGC-1_CRC0  | Epithelial cells type1 | 1607 |
| CTCAGAATCAACCATG-1_CRC0  | Epithelial cells type1 | 2081 |

|                         |                        |      |
|-------------------------|------------------------|------|
| GTCCTCAGTCATGCCG-1_CRC0 | Epithelial cells type1 | 1557 |
| ACGGCCACATCTGGTA-1_CRC0 | Epithelial cells type1 | 1361 |
| ACAGCTAAGTGATCGG-1_CRC0 | Epithelial cells type1 | 1280 |
| TGCGCAGGTAAGTGGC-1_CRC0 | Epithelial cells type1 | 1437 |
| AGTCTTTGTCTTGATG-1_CRC0 | Epithelial cells type1 | 1183 |
| GTCAAGTGACGAAAT-1_CRC0  | Epithelial cells type1 | 914  |
| CATTCGCAGTGAAGAG-1_CRC0 | Epithelial cells type1 | 1119 |
| GCTCCTATCTGCTGCT-1_CRC0 | Epithelial cells type1 | 1585 |
| AAACCTGCAGCTGGCT-1_CRC0 | Epithelial cells type1 | 1485 |
| GATGAGGGTGTCTTT-1_CRC0  | Epithelial cells type1 | 1582 |
| GTGGGTCCAGCTTCGG-1_CRC0 | Epithelial cells type1 | 1715 |
| GTGCATAAGGCATTGG-1_CRC0 | Epithelial cells type1 | 1234 |
| TCTTCGGTCGTTACGA-1_CRC0 | Epithelial cells type1 | 1221 |
| GAACGGATCAACACGT-1_CRC0 | Epithelial cells type1 | 1382 |
| GCGCGATGTTCCACGG-1_CRC0 | Epithelial cells type1 | 1712 |
| AACTCCCCAGACAGGT-1_CRC0 | Epithelial cells type1 | 1504 |
| TCATTTGTCCGCATCT-1_CRC0 | Epithelial cells type1 | 1596 |
| TGGGCGTAGTGGGATC-1_CRC0 | Epithelial cells type1 | 1268 |
| GGCGACTAGCGGATCA-1_CRC0 | Epithelial cells type1 | 1133 |
| AAGCCGCAGCTAACTC-1_CRC0 | Epithelial cells type1 | 1007 |
| TACGGTACATTGAGCT-1_CRC0 | Epithelial cells type1 | 993  |
| TTCTCCTCATATACGC-1_CRC0 | Epithelial cells type1 | 1575 |
| GCTTGAAAGTTGCAGG-1_CRC0 | Epithelial cells type1 | 1258 |
| GTTTCGGGGTGTGGGA-1_CRC0 | Epithelial cells type1 | 1595 |
| AGTGTCATCAAGATCC-1_CRC0 | Epithelial cells type1 | 1288 |
| GATCAGTGTAAGGAG-1_CRC0  | Epithelial cells type1 | 1138 |
| ATTTCTGTCTTGTACT-1_CRC0 | Epithelial cells type1 | 1213 |
| TGACTTTCAGACGTAG-1_CRC0 | Epithelial cells type1 | 1090 |
| GACTACACAACACCCG-1_CRC0 | Epithelial cells type1 | 1053 |
| CACACTCTCCATTCTA-1_CRC0 | Epithelial cells type1 | 1193 |
| CTCAGAATCAGCTCTC-1_CRC0 | Epithelial cells type1 | 1079 |
| AAGGAGCAGTGACTCT-1_CRC0 | Epithelial cells type1 | 1766 |
| GGACATTAGTCATCCA-1_CRC0 | Epithelial cells type1 | 1485 |
| TGAGCCGTCGCCCTTA-1_CRC0 | Epithelial cells type1 | 1330 |
| CGGTAAAGTGAAGGCT-1_CRC0 | Epithelial cells type1 | 2097 |
| CATCGAATCCTGCAGG-1_CRC0 | Epithelial cells type1 | 1087 |
| GTAGGCCAGGAAGTGC-1_CRC0 | Epithelial cells type1 | 1388 |
| AGAGCGATCGCTAGCG-1_CRC0 | Epithelial cells type1 | 1221 |
| TACTCGCGTACGCACC-1_CRC0 | Epithelial cells type1 | 1470 |
| AACACGTGTCTGCAAT-1_CRC0 | Epithelial cells type1 | 1676 |
| TTGAACGGTTCACAA-1_CRC0  | Epithelial cells type1 | 1862 |
| AACTCAGTCTTAACCT-1_CRC0 | Epithelial cells type1 | 1475 |
| CTCGGGAAGAGCTGGT-1_CRC0 | Epithelial cells type1 | 1180 |
| TCGTAGACAGTGGAGT-1_CRC0 | Epithelial cells type1 | 1660 |
| ATTACTCGTCAGATAA-1_CRC0 | Epithelial cells type1 | 1738 |
| GCGCGATAGCAATATG-1_CRC0 | Epithelial cells type1 | 1878 |
| GTGCATAGTAATCACC-1_CRC0 | Epithelial cells type1 | 1816 |
| CCTATTAAGATAGGAG-1_CRC0 | Epithelial cells type1 | 1700 |
| ATAAGAGTCAAACCAC-1_CRC0 | Epithelial cells type1 | 1556 |
| GCTGCTTTCGTTTAGG-1_CRC0 | Epithelial cells type1 | 1668 |
| GGACAGAAGTCTCCTC-1_CRC0 | Epithelial cells type1 | 2244 |

|                         |                        |      |
|-------------------------|------------------------|------|
| GTCTTCGTCTGTCTAT-1_CRC0 | Epithelial cells type1 | 1609 |
| CTGGTCTAGTGGCACA-1_CRC0 | Epithelial cells type1 | 2041 |
| AGCGGTCCATCCCACT-1_CRC0 | Epithelial cells type1 | 2446 |
| GCTTGAATCCATTCTA-1_CRC0 | Epithelial cells type1 | 1378 |
| CCCATACGTACTTAGC-1_CRC0 | Epithelial cells type1 | 2140 |
| ACAGCTACAGGGTTAG-1_CRC0 | Epithelial cells type1 | 1314 |
| AGATCTGGTGAAGGCT-1_CRC0 | Epithelial cells type1 | 1794 |
| GAGCAGATCCTGCAGG-1_CRC0 | Epithelial cells type1 | 1601 |
| GCTCCTACAGCTGCTG-1_CRC0 | Epithelial cells type1 | 1612 |
| GCATACAGTTTGACAC-1_CRC0 | Epithelial cells type1 | 3873 |
| TCGAGGCCACCGAATT-1_CRC0 | Epithelial cells type1 | 1855 |
| GCGCCAAGTATTACCG-1_CRC0 | Epithelial cells type1 | 2128 |
| AACACGTAGCGGATCA-1_CRC0 | Epithelial cells type1 | 1900 |
| CGAGAAGGTGGCAAAC-1_CRC0 | Epithelial cells type1 | 1815 |
| TTGCCGTCACTTCGAA-1_CRC0 | Epithelial cells type1 | 1510 |
| ACATACGGTGCGGTAA-1_CRC0 | Epithelial cells type1 | 1357 |
| CGCGGTAGTTCTGGTA-1_CRC0 | Epithelial cells type1 | 1383 |
| GATGAGGAGCGTGTCC-1_CRC0 | Epithelial cells type1 | 1720 |
| TCACAAGGTAGAGCTG-1_CRC0 | Epithelial cells type1 | 1346 |
| GAATAAGCAGGATCGA-1_CRC0 | Epithelial cells type1 | 1768 |
| TCGAGGCCAGTATAAG-1_CRC0 | Epithelial cells type1 | 2152 |
| ATGCGATGTGGTTTCA-1_CRC0 | Epithelial cells type1 | 2275 |
| GTCGGGTGTTCCCTTG-1_CRC0 | Epithelial cells type1 | 1978 |
| AGCATACCAGTTTACG-1_CRC0 | Epithelial cells type1 | 1821 |
| GACAGAGCAGTCAGCC-1_CRC0 | Epithelial cells type1 | 1548 |
| CACATAGCACCAACCG-1_CRC0 | Epithelial cells type1 | 2008 |
| CTTGGCTCAATAACGA-1_CRC0 | Epithelial cells type1 | 1450 |
| AACGTTGGTGAGGCTA-1_CRC0 | Epithelial cells type1 | 2145 |
| CATTATCTCAGTTAGC-1_CRC0 | Epithelial cells type1 | 1840 |
| CGATTGATCACAAACC-1_CRC0 | Epithelial cells type1 | 1752 |
| AGAGCGAAGGCTAGCA-1_CRC0 | Epithelial cells type1 | 2038 |
| GCGAGAAGTAAGGGAA-1_CRC0 | Epithelial cells type1 | 1940 |
| GCGCCAATCGAGAACG-1_CRC0 | Epithelial cells type1 | 1341 |
| AACTGATCTGAGGGA-1_CRC0  | Epithelial cells type1 | 2248 |
| CCATTCGCACGGACAA-1_CRC0 | Epithelial cells type1 | 1706 |
| CATTCGCGTGTTGGGA-1_CRC0 | Epithelial cells type1 | 2446 |
| TATGCCCCAGTGACAG-1_CRC0 | Epithelial cells type1 | 2398 |
| AGCCTAATCTCGCTTG-1_CRC0 | Epithelial cells type1 | 1997 |
| GACGGCTAGATGTAAC-1_CRC0 | Epithelial cells type1 | 1887 |
| CGAACATGTCTGCGGT-1_CRC0 | Epithelial cells type1 | 1825 |
| CGTCAGGCAGCGTTCG-1_CRC0 | Epithelial cells type1 | 1482 |
| CTAAGACGTAGAAGGA-1_CRC0 | Epithelial cells type1 | 1496 |
| CCTACCAGTGGCAAAC-1_CRC0 | Epithelial cells type1 | 1242 |
| TTCTTAGGTTGGTGGA-1_CRC0 | Epithelial cells type1 | 1691 |
| AGAGTGGTCCCATAT-1_CRC0  | Epithelial cells type1 | 1651 |
| GGACAGAGTACCCAAT-1_CRC0 | Epithelial cells type1 | 1768 |
| CGCTGGACAATAGCAA-1_CRC0 | Epithelial cells type1 | 1629 |
| CAAGAAACACCCATTC-1_CRC0 | Epithelial cells type1 | 1835 |
| GTGCAGCAGCGTAATA-1_CRC0 | Epithelial cells type1 | 1784 |
| GGGCATCTCCCTCAGT-1_CRC0 | Epithelial cells type1 | 1622 |
| TGGACGCAGCACGCCT-1_CRC0 | Epithelial cells type1 | 1626 |

|                         |                        |      |
|-------------------------|------------------------|------|
| AGTCTTTGTCGTCTTC-1_CRC0 | Epithelial cells type1 | 1502 |
| CCGTACTGTTCCGGCA-1_CRC0 | Epithelial cells type1 | 1368 |
| TTTGTCACAGCCTATA-1_CRC0 | Epithelial cells type1 | 1535 |
| ACTGAACGTACCGTAT-1_CRC0 | Epithelial cells type1 | 1499 |
| ATTGGACAGCAAATCA-1_CRC0 | Epithelial cells type1 | 1569 |
| GTTCGGGTCCAGTATG-1_CRC0 | Epithelial cells type1 | 1792 |
| TACTTGTGTACAAGTA-1_CRC0 | Epithelial cells type1 | 1973 |
| ATAACGCCAACAACCT-1_CRC0 | Epithelial cells type1 | 2154 |
| CCTTTCTCATCGATGT-1_CRC0 | Epithelial cells type1 | 1964 |
| CTGCTGTGTACAAGTA-1_CRC0 | Epithelial cells type1 | 1674 |
| TGCCCATCAAGTCTGT-1_CRC0 | Epithelial cells type1 | 1616 |
| CGAGAAGAGGCCCTCA-1_CRC0 | Epithelial cells type1 | 1896 |
| CTCGAGGCAGGGAGAG-1_CRC0 | Epithelial cells type1 | 1890 |
| GGGCACTCACCAGTTA-1_CRC0 | Epithelial cells type1 | 5652 |
| ATGCGATTCCAGATCA-1_CRC1 | Epithelial cells type1 | 6111 |
| GCTGCGACAGCCAATT-1_CRC0 | Epithelial cells type1 | 2464 |
| ATCCACCGTTCGTTGA-1_CRC0 | Epithelial cells type1 | 2533 |
| CGTGTAAGTTCTGTTT-1_CRC0 | Epithelial cells type1 | 2460 |
| AGGGATGTCGATGAGG-1_CRC0 | Epithelial cells type1 | 2319 |
| TGTCCCACAAGGGTCA-1_CRC0 | Epithelial cells type1 | 1952 |
| GATCGCGTCGTCCAGG-1_CRC0 | Epithelial cells type1 | 2458 |
| TACTTACAGCGGATCA-1_CRC0 | Epithelial cells type1 | 2164 |
| CAGCCGATCAAGATCC-1_CRC0 | Epithelial cells type1 | 1945 |
| TGTATTCTCTTCCTTC-1_CRC0 | Epithelial cells type1 | 2388 |
| CTGAAACAGATCCTGT-1_CRC0 | Epithelial cells type1 | 2458 |
| AATCCAGGTCGTCTTC-1_CRC0 | Epithelial cells type1 | 1577 |
| GTCACGGCAGTTAACC-1_CRC0 | Epithelial cells type1 | 2042 |
| ACTGTCCCACCCAGTG-1_CRC0 | Epithelial cells type1 | 1414 |
| ACGCCGATCGTACGGC-1_CRC0 | Epithelial cells type1 | 1380 |
| GCGAGAACAATTCCTT-1_CRC0 | Epithelial cells type1 | 1772 |
| TTGTAGGAGAAGCCCA-1_CRC0 | Epithelial cells type1 | 2161 |
| CAGCATAGTGTAATGA-1_CRC0 | Epithelial cells type1 | 2347 |
| TACCTTAAGTACGTTC-1_CRC0 | Epithelial cells type1 | 1888 |
| CATATGGCAATAACGA-1_CRC0 | Epithelial cells type1 | 2086 |
| CTCTACGAGCTTTGGT-1_CRC0 | Epithelial cells type1 | 2294 |
| CGATTGAAGTCTCCTC-1_CRC0 | Epithelial cells type1 | 2744 |
| CTCTGGTCATATACCG-1_CRC0 | Epithelial cells type1 | 3123 |
| ACGCCGACAAGCTGTT-1_CRC0 | Epithelial cells type1 | 2768 |
| TTATGCTCAAAGAATC-1_CRC0 | Epithelial cells type1 | 2245 |
| CGTGTAATCTCCCTGA-1_CRC0 | Epithelial cells type1 | 2391 |
| AAGACCTCATCCCACT-1_CRC0 | Epithelial cells type1 | 2392 |
| AGGCCGTAGCACACAG-1_CRC0 | Epithelial cells type1 | 1988 |
| GCTTCCAGTCTTTCAT-1_CRC0 | Epithelial cells type1 | 1691 |
| CGTCTACAGCCACGTC-1_CRC0 | Epithelial cells type1 | 2124 |
| GAGCAGATCTGCGGCA-1_CRC0 | Epithelial cells type1 | 1761 |
| CATGCCTCACAACGCC-1_CRC0 | Epithelial cells type1 | 2181 |
| ACCCACTGTATGGTTC-1_CRC0 | Epithelial cells type1 | 2003 |
| GGGAATGTCCGCGGTA-1_CRC0 | Epithelial cells type1 | 2926 |
| GTACGTAAGTCAATAG-1_CRC1 | Epithelial cells type1 | 1319 |
| GACTGCGTCAGGTTCA-1_CRC1 | Epithelial cells type1 | 1504 |
| GCGCGATCAGCCAATT-1_CRC1 | Epithelial cells type1 | 1990 |

|                          |                        |      |
|--------------------------|------------------------|------|
| ACAGCTAGTACTCGCG-1_CRC1  | Epithelial cells type1 | 2839 |
| AGTCTTTCAGCTCGCA-1_CRC1  | Epithelial cells type1 | 2898 |
| CCTATTACACTGTGTA-1_CRC1  | Epithelial cells type1 | 2291 |
| GTACGTAAGGTCATCT-1_CRC1  | Epithelial cells type1 | 1681 |
| CGGACGTGTACCTACA-1_CRC1  | Epithelial cells type1 | 2767 |
| ACGGCCACAGCCAGAA-1_CRC1  | Epithelial cells type1 | 1037 |
| AGGGATGAGGTCGGAT-1_CRC1  | Epithelial cells type1 | 1429 |
| ATCACGATCCAGAAGG-1_CRC1  | Epithelial cells type1 | 1309 |
| GTCGGGTAGAGCTGCA-1_CRC1  | Epithelial cells type1 | 1635 |
| GGATTACCATTCTGTC-1_CRC1  | Epithelial cells type1 | 2446 |
| GCACTCTCAAGCGAGT-1_CRC1  | Epithelial cells type1 | 1765 |
| CATGCCTCAATGAATG-1_CRC1  | Epithelial cells type1 | 908  |
| TAGGCATTCTTGGGTA-1_CRC1  | Epithelial cells type1 | 1175 |
| ATGAGGGTCAGCATGT-1_CRC1  | Epithelial cells type1 | 1263 |
| CTCGGAGCAGCCAATT-1_CRC1  | Epithelial cells type1 | 966  |
| AATCGGTGTTTCATGGT-1_CRC1 | Epithelial cells type1 | 976  |
| TTCGGTCAGTATCTCG-1_CRC1  | Epithelial cells type1 | 1144 |
| GACCAATTCATCGCTC-1_CRC1  | Epithelial cells type1 | 1379 |
| GGATTACCAAGAGTCG-1_CRC1  | Epithelial cells type1 | 816  |
| ACGGGCTGTCAGAGGT-1_CRC1  | Epithelial cells type1 | 1758 |
| CAACTAGAGAGACGAA-1_CRC1  | Epithelial cells type1 | 1558 |
| TTAGGCACACGAAATA-1_CRC1  | Epithelial cells type1 | 909  |
| ACCTTTATCTCTGCTG-1_CRC1  | Epithelial cells type1 | 1592 |
| AACTCAGTCGAACGGA-1_CRC1  | Epithelial cells type1 | 1072 |
| CGGACGTAGCGACGTA-1_CRC1  | Epithelial cells type1 | 767  |
| CTGCTGTTCTATCGCC-1_CRC1  | Epithelial cells type1 | 969  |
| CATCAGACATTAGGCT-1_CRC1  | Epithelial cells type1 | 1145 |
| TGAGCCGCATGGGAAC-1_CRC1  | Epithelial cells type1 | 916  |
| GGCTGGTAGTAGTGCG-1_CRC1  | Epithelial cells type1 | 1119 |
| GTGTTAGTCGAATGCT-1_CRC1  | Epithelial cells type1 | 1329 |
| AAACGGGGTGCACGAA-1_CRC1  | Epithelial cells type1 | 1531 |
| TATGCCCGTCCCGACA-1_CRC1  | Epithelial cells type1 | 1804 |
| AGTTGGTTCGTTTAGG-1_CRC1  | Epithelial cells type1 | 730  |
| CTGTTTAAGGTCATCT-1_CRC1  | Epithelial cells type1 | 1074 |
| GACTAACTCAGTCCCT-1_CRC1  | Epithelial cells type1 | 1474 |
| CCCATACAGTCAAGCG-1_CRC1  | Epithelial cells type1 | 1386 |
| GACGGCTTCGGACAAG-1_CRC1  | Epithelial cells type1 | 1235 |
| GCTCTGTTCTTTCCTC-1_CRC1  | Epithelial cells type1 | 1056 |
| TATGCCCCAGCTGCAC-1_CRC1  | Epithelial cells type1 | 1374 |
| TCGCGTTGTTGGACCC-1_CRC1  | Epithelial cells type1 | 1359 |
| CCGGTAGAGTCGTTTG-1_CRC1  | Epithelial cells type1 | 1524 |
| ACTGAACGTAGAGTGC-1_CRC1  | Epithelial cells type1 | 1597 |
| TCTTCGGGTCCGTCAG-1_CRC1  | Epithelial cells type1 | 1175 |
| CAGAGAGTCCGTCAAA-1_CRC1  | Epithelial cells type1 | 2035 |
| TCCACACAGGTGATAT-1_CRC1  | Epithelial cells type1 | 1989 |
| TGGCGCAGTGGGTCAA-1_CRC1  | Epithelial cells type1 | 1613 |
| AGCATACGTTCTGGTA-1_CRC1  | Epithelial cells type1 | 1335 |
| GATTCAGAGACCTTTG-1_CRC1  | Epithelial cells type1 | 1533 |
| ACGAGGACATCGGGTC-1_CRC1  | Epithelial cells type1 | 1222 |
| CTACACCCACTCTGTC-1_CRC1  | Epithelial cells type1 | 1504 |
| CGCGGTAAGTAGGCCA-1_CRC1  | Epithelial cells type1 | 1803 |

|                          |                        |      |
|--------------------------|------------------------|------|
| AGCATACGTCTCTCTG-1_CRC1  | Epithelial cells type1 | 1242 |
| AACTGAAGAGTCTGG-1_CRC1   | Epithelial cells type1 | 1445 |
| CAGAGAGAGTGCCAGA-1_CRC1  | Epithelial cells type1 | 1106 |
| GACGGCTAGCTAGCCC-1_CRC1  | Epithelial cells type1 | 1459 |
| GCATGATCATGCGCAC-1_CRC1  | Epithelial cells type1 | 904  |
| GACGGCTTCTTCATGT-1_CRC1  | Epithelial cells type1 | 810  |
| CGATGGCAGGCAGGTT-1_CRC1  | Epithelial cells type1 | 841  |
| GCTCCTAGTACAGACG-1_CRC1  | Epithelial cells type1 | 953  |
| GACGCGTGTGCGCCATG-1_CRC1 | Epithelial cells type1 | 1905 |
| GCTGGGTTCGCAAGCC-1_CRC1  | Epithelial cells type1 | 1203 |
| TTTCCTCAGGGATCTG-1_CRC1  | Epithelial cells type1 | 972  |
| CGCGGTACAGCGAACA-1_CRC1  | Epithelial cells type1 | 1231 |
| CGCTATCCATACAGCT-1_CRC1  | Epithelial cells type1 | 885  |
| CGTTGGGAGACTGGGT-1_CRC1  | Epithelial cells type1 | 737  |
| GACGGCTCAGGTCTCG-1_CRC1  | Epithelial cells type1 | 1939 |
| GTTCTCGGTAATTGGA-1_CRC1  | Epithelial cells type1 | 1110 |
| CCTAAAGTCTATCGCC-1_CRC1  | Epithelial cells type1 | 758  |
| CTGTTTACACTGTTAG-1_CRC1  | Epithelial cells type1 | 755  |
| TTCGAAGAGACAGACC-1_CRC1  | Epithelial cells type1 | 1209 |
| CGAGCACGTGCGCACT-1_CRC1  | Epithelial cells type1 | 978  |
| TCGCGAGCAGCTGCTG-1_CRC1  | Epithelial cells type1 | 1007 |
| TCTCATATCCGCGGTA-1_CRC1  | Epithelial cells type1 | 628  |
| TGGCCAGTCTTGCAAT-1_CRC1  | Epithelial cells type1 | 633  |
| CATATGGGTAGCTTGT-1_CRC1  | Epithelial cells type1 | 484  |
| CTCAGAAAGATGCCTT-1_CRC1  | Epithelial cells type1 | 709  |
| CGACTTCCAAGTGCAG-1_CRC1  | Epithelial cells type1 | 806  |
| CTAAGACGTCCGAAGA-1_CRC1  | Epithelial cells type1 | 889  |
| GTGCGGTGTATACCA-1_CRC1   | Epithelial cells type1 | 709  |
| CGCGTTTGTTCGCTAA-1_CRC1  | Epithelial cells type1 | 1116 |
| AGTTGGTGTTCGCGC-1_CRC1   | Epithelial cells type1 | 588  |
| GACGCGTGTGCACTTA-1_CRC1  | Epithelial cells type1 | 736  |
| CATTATCTCACGGTTA-1_CRC1  | Epithelial cells type1 | 1099 |
| TTTATGCGTTCCAACA-1_CRC1  | Epithelial cells type1 | 1249 |
| TCTTTCCATCAGTAC-1_CRC1   | Epithelial cells type1 | 1105 |
| GTGCTTCCACGAGGTA-1_CRC1  | Epithelial cells type1 | 1069 |
| TCAGATGGTAGAGCTG-1_CRC1  | Epithelial cells type1 | 806  |
| TTTGTCATCGATAGAA-1_CRC1  | Epithelial cells type1 | 1099 |
| ATCTACTTCGCTGATA-1_CRC1  | Epithelial cells type1 | 968  |
| AGTTGGTTCCTATGTT-1_CRC1  | Epithelial cells type1 | 678  |
| TTCGGTCTCGAATGCT-1_CRC1  | Epithelial cells type1 | 901  |
| AAGGAGCAGGCTAGGT-1_CRC1  | Epithelial cells type1 | 785  |
| AGCATACTCTGCGACG-1_CRC1  | Epithelial cells type1 | 577  |
| CCGGTAGTCTTAGCCC-1_CRC1  | Epithelial cells type1 | 665  |
| GGCGACTTCCTGCAGG-1_CRC1  | Epithelial cells type1 | 1118 |
| AACTCAGGTCTCTTAT-1_CRC1  | Epithelial cells type1 | 1035 |
| CTCTGGTGTAGGACAC-1_CRC1  | Epithelial cells type1 | 1458 |
| TGGGCGTGTGTGGAG-1_CRC1   | Epithelial cells type1 | 1345 |
| AGGCCACAGTGCCAGA-1_CRC1  | Epithelial cells type1 | 1238 |
| GGGCACTTCATCACCC-1_CRC1  | Epithelial cells type1 | 1988 |
| GAACCTATCGACGGAA-1_CRC1  | Epithelial cells type1 | 1712 |
| TGCTACCCAATCTGCA-1_CRC1  | Epithelial cells type1 | 1650 |

|                          |                        |      |
|--------------------------|------------------------|------|
| CCTCAGTCAGCTGCAC-1 CRC1  | Epithelial cells type1 | 1702 |
| GCGCAACGTTCGTCTC-1 CRC1  | Epithelial cells type1 | 1326 |
| CGTAGGCCATTCACTT-1 CRC1  | Epithelial cells type1 | 1515 |
| CTCGGAGCAGGTGGAT-1 CRC1  | Epithelial cells type1 | 1220 |
| GCTGCTTGTACCGAGA-1 CRC1  | Epithelial cells type1 | 1195 |
| TAGCCGGCATTAGCCA-1 CRC1  | Epithelial cells type1 | 1542 |
| TTCTCAATCTAACTGG-1 CRC1  | Epithelial cells type1 | 1230 |
| GTAGTCATCCTCATTA-1 CRC1  | Epithelial cells type1 | 1367 |
| CGCCAAGCAGTCACTA-1 CRC1  | Epithelial cells type1 | 1038 |
| CGCTTCACACGGTTTA-1 CRC1  | Epithelial cells type1 | 1038 |
| TAGACCAGTCAAAGAT-1 CRC1  | Epithelial cells type1 | 1146 |
| AAAGATGGTAAACACA-1 CRC1  | Epithelial cells type1 | 1803 |
| TGACGGCTCCAGTAGT-1 CRC1  | Epithelial cells type1 | 1780 |
| AGAATAGCATTGGCGC-1 CRC1  | Epithelial cells type1 | 1156 |
| CCGTTTCATCCGAGCCA-1 CRC1 | Epithelial cells type1 | 848  |
| CCTAGCTTCCGTTGTC-1 CRC1  | Epithelial cells type1 | 1299 |
| GATCGTACACTGCCAG-1 CRC1  | Epithelial cells type1 | 1658 |
| GCGCAACGTTTGACAC-1 CRC1  | Epithelial cells type1 | 1203 |
| GGGAGATGTGACCAAG-1 CRC1  | Epithelial cells type1 | 1308 |
| AACACGTAGGATGGAA-1 CRC1  | Epithelial cells type1 | 3785 |
| CCATGTCCACCACCAG-1 CRC1  | Epithelial cells type1 | 1766 |
| TAGACCAGTGGCTCCA-1 CRC1  | Epithelial cells type1 | 1352 |
| AGGGAGTAGTGAAGTT-1 CRC1  | Epithelial cells type1 | 1225 |
| TACTCATAGTGGCACA-1 CRC1  | Epithelial cells type1 | 1360 |
| GGCGTGTTCAACGGCC-1 CRC1  | Epithelial cells type1 | 1831 |
| AAAGATGCAATGGTCT-1 CRC1  | Epithelial cells type1 | 1116 |
| GACTACAGTGGTCCGT-1 CRC1  | Epithelial cells type1 | 1099 |
| AGCATACAGGCGACAT-1 CRC1  | Epithelial cells type1 | 1024 |
| CCCAGTTGTATGAATG-1 CRC1  | Epithelial cells type1 | 720  |
| GACTAACTCAACTCTT-1 CRC1  | Epithelial cells type1 | 838  |
| ATTGGACGTAGGCTGA-1 CRC1  | Epithelial cells type1 | 994  |
| CTGCGGACAGCGAACA-1 CRC1  | Epithelial cells type1 | 747  |
| TTAGTTCGTGCACGAA-1 CRC1  | Epithelial cells type1 | 1599 |
| CTCTGGTGTGCTTTC-1 CRC1   | Epithelial cells type1 | 620  |
| GCTCTGTGTTCCATGA-1 CRC1  | Epithelial cells type1 | 535  |
| ACCTTTACATCGATGT-1 CRC1  | Epithelial cells type1 | 878  |
| ATGAGGGTCGCTGAG-1 CRC1   | Epithelial cells type1 | 912  |
| CTGATAGTCGGCCGAT-1 CRC1  | Epithelial cells type1 | 888  |
| ATCTGCCCAACACCTA-1 CRC1  | Epithelial cells type1 | 1016 |
| TCGTAGATCCCTCAGT-1 CRC1  | Epithelial cells type1 | 985  |
| TCGAGGCAGGCTCTTA-1 CRC1  | Epithelial cells type1 | 1149 |
| CGTGTAAGAACAATC-1 CRC1   | Epithelial cells type1 | 962  |
| TCTGGAAGCTTCGCG-1 CRC1   | Epithelial cells type1 | 1092 |
| CGTCCATGTGATGTGG-1 CRC1  | Epithelial cells type1 | 1305 |
| ATTGGACCATTGCGGC-1 CRC1  | Epithelial cells type1 | 1307 |
| CTAGCCTGTAGCTCCG-1 CRC1  | Epithelial cells type1 | 1171 |
| TTTACTGTCCTCATTA-1 CRC1  | Epithelial cells type1 | 1061 |
| GCGCGATCAGACAGGT-1 CRC2  | Epithelial cells type1 | 1668 |
| CGCGGTACAATAGCAA-1 CRC2  | Epithelial cells type1 | 1680 |
| GGATGTTCAGTATGCT-1 CRC2  | Epithelial cells type1 | 1012 |
| GTGGGTCTCTCAAGTG-1 CRC2  | Epithelial cells type1 | 955  |

|                         |                        |      |
|-------------------------|------------------------|------|
| CCACGGAAGGGCTCTC-1_CRC3 | Epithelial cells type1 | 1258 |
| TGTCCCATCCTCGCAT-1_CRC3 | Epithelial cells type1 | 1210 |
| CACATAGAGAGGGATA-1_CRC1 | Epithelial cells type1 | 1168 |
| ACTGAGTAGCTAGTTC-1_CRC2 | Epithelial cells type1 | 1338 |
| AAACCTGCATTTGCTT-1_CRC2 | Epithelial cells type1 | 1523 |
| CAAGATCCACCCATGG-1_CRC3 | Epithelial cells type1 | 1097 |
| CACACAAGTCTAGGTT-1_CRC3 | Epithelial cells type1 | 1221 |
| GGGAATGGTCCAGTGC-1_CRC2 | Epithelial cells type1 | 610  |
| TCAGGATAGGGCTTCC-1_CRC3 | Epithelial cells type1 | 687  |
| AAGGCAGAGGGATCTG-1_CRC3 | Epithelial cells type1 | 879  |
| TCATTTGCAATGAATG-1_CRC2 | Epithelial cells type1 | 519  |
| TCTCTAACAATCACAC-1_CRC2 | Epithelial cells type1 | 309  |
| ATTTCTGTCACCATAG-1_CRC3 | Epithelial cells type1 | 442  |
| GCTTGAAGTCGCTTTC-1_CRC2 | Epithelial cells type1 | 573  |
| AGCTCTCGTATCTGCA-1_CRC3 | Epithelial cells type1 | 387  |
| TTCTCCTTCGATCCCT-1_CRC3 | Epithelial cells type1 | 481  |
| CACCAGGAGCTAACTC-1_CRC2 | Epithelial cells type1 | 149  |
| CATCAAGCAATAACGA-1_CRC2 | Epithelial cells type1 | 100  |
| ACTGATGAGGCTATCT-1_CRC3 | Epithelial cells type1 | 228  |
| ATAGACCGTCCGAAGA-1_CRC2 | Epithelial cells type1 | 588  |
| GTCTCGTCAGCGTCCA-1_CRC2 | Epithelial cells type1 | 642  |
| CTCGGGACACGTAAGG-1_CRC3 | Epithelial cells type1 | 648  |
| GACTGCGCAGTCGTGC-1_CRC3 | Epithelial cells type1 | 779  |
| ACGCCGAGTGTGCGTC-1_CRC2 | Epithelial cells type1 | 812  |
| CAGCCGACAGCGTCCA-1_CRC2 | Epithelial cells type1 | 762  |
| ACACCGGGTTGGTAAA-1_CRC3 | Epithelial cells type1 | 1127 |
| ATCTGCCTCACAAACC-1_CRC3 | Epithelial cells type1 | 686  |
| CGAGCCATCCCATTAT-1_CRC2 | Epithelial cells type1 | 514  |
| GTAACGTTCCGAAGAG-1_CRC3 | Epithelial cells type1 | 672  |
| CGATCGGAGACTACAA-1_CRC2 | Epithelial cells type1 | 975  |
| TTCCAGTCACCGGGT-1_CRC2  | Epithelial cells type1 | 734  |
| TTGCGTCTCGGTCCGA-1_CRC2 | Epithelial cells type1 | 685  |
| GTAGGCCAGTACGTAA-1_CRC3 | Epithelial cells type1 | 904  |
| CACAGTAAGCGTGAGT-1_CRC2 | Epithelial cells type1 | 913  |
| CTCGTCAGTCGACTGC-1_CRC2 | Epithelial cells type1 | 923  |
| GCGCGATGTTGTGGCC-1_CRC3 | Epithelial cells type1 | 1177 |
| AAGACCTGTCTTCTCG-1_CRC2 | Epithelial cells type1 | 894  |
| CGCTGGACAGGATCGA-1_CRC2 | Epithelial cells type1 | 370  |
| ACGTCAAAGTACGATA-1_CRC2 | Epithelial cells type1 | 1042 |
| GACGTTATCTGGCGTG-1_CRC0 | Epithelial cells type1 | 965  |
| TCTGAGATCAGGCCCA-1_CRC2 | Epithelial cells type1 | 1182 |
| CGGGTCACATTCCTCG-1_CRC2 | Epithelial cells type1 | 1403 |
| GACGTGCTCCGCAGTG-1_CRC3 | Epithelial cells type1 | 1253 |
| TCAGGTACAGTATAAG-1_CRC1 | Epithelial cells type1 | 2548 |
| TGAGCCGTCACGAAT-1_CRC2  | Epithelial cells type1 | 823  |
| TGGGCGTGTTGCGAC-1_CRC2  | Epithelial cells type1 | 963  |
| CGAGAAGAGACCTTTG-1_CRC2 | Epithelial cells type1 | 1013 |
| GTCAAGTGTAACGCGA-1_CRC2 | Epithelial cells type1 | 1055 |
| CTCTGGTCATTACCTT-1_CRC2 | Epithelial cells type1 | 358  |
| CGATGTATCTCACATT-1_CRC2 | Epithelial cells type1 | 606  |
| TCTGGAAAGACTGTAA-1_CRC2 | Epithelial cells type1 | 557  |



|                          |                        |      |
|--------------------------|------------------------|------|
| AACTCAGAGAGGACGG-1_CRC2  | Epithelial cells type1 | 395  |
| CTCGTCACATAGACTC-1_CRC2  | Epithelial cells type1 | 361  |
| AAGGCAGGTCCTGCTT-1_CRC2  | Epithelial cells type1 | 480  |
| GATTCAGGTACACCGC-1_CRC2  | Epithelial cells type1 | 462  |
| ATCCGAAAGCTGCAAG-1_CRC2  | Epithelial cells type1 | 350  |
| GTCGGGTTCGGCATCG-1_CRC2  | Epithelial cells type1 | 270  |
| CACATTTGTCTAACGT-1_CRC2  | Epithelial cells type1 | 536  |
| TCAGATGCAATCACAC-1_CRC2  | Epithelial cells type1 | 496  |
| ACTTACTCATGCCTAA-1_CRC2  | Epithelial cells type1 | 619  |
| GGTGTTAAGGGAGTAA-1_CRC2  | Epithelial cells type1 | 318  |
| GTCTTCGTCTCTGTCG-1_CRC2  | Epithelial cells type1 | 369  |
| ACTTGTTAGATGGCGT-1_CRC2  | Epithelial cells type1 | 315  |
| AGCGGTCCAGTGACAG-1_CRC2  | Epithelial cells type1 | 378  |
| TTCGGTCTCTTATG-1_CRC2    | Epithelial cells type1 | 353  |
| TTTATGCGTACGAAAT-1_CRC2  | Epithelial cells type1 | 267  |
| GACTGCGCATTTGCC-1_CRC2   | Epithelial cells type1 | 800  |
| CATATGGCATGCCCGA-1_CRC2  | Epithelial cells type1 | 520  |
| GGCGACTCATGCCACG-1_CRC2  | Epithelial cells type1 | 589  |
| CAGAATCCACATGACT-1_CRC2  | Epithelial cells type1 | 287  |
| ACTGTCCTCATGCAAC-1_CRC2  | Epithelial cells type1 | 266  |
| CGTTCTGCATAGTAAG-1_CRC2  | Epithelial cells type1 | 225  |
| CTAGCCTGTGCGGTAA-1_CRC2  | Epithelial cells type1 | 257  |
| GGCGACTTCCCTGACT-1_CRC2  | Epithelial cells type1 | 157  |
| ACAGCTACAATAAGCA-1_CRC2  | Epithelial cells type1 | 242  |
| AGATCTGGTCCGTGAC-1_CRC2  | Epithelial cells type1 | 107  |
| CGACCTTTCACATAGC-1_CRC2  | Epithelial cells type1 | 212  |
| ACGCAGCCAATAGCGG-1_CRC2  | Epithelial cells type1 | 203  |
| CTCTACGAGGCCCTTG-1_CRC2  | Epithelial cells type1 | 162  |
| GCGCAACAGCATCATC-1_CRC2  | Epithelial cells type1 | 630  |
| GCTGGGTTCTCTGAGA-1_CRC2  | Epithelial cells type1 | 300  |
| TCTTTCCGTTTGGGCC-1_CRC2  | Epithelial cells type1 | 553  |
| CTCGGAGAGCGTGTCC-1_CRC2  | Epithelial cells type1 | 439  |
| AACCGCGTCAACACGT-1_CRC2  | Epithelial cells type1 | 130  |
| GTCGTAACAAGTACCT-1_CRC2  | Epithelial cells type1 | 70   |
| AACGTTGGTGCTGTAT-1_CRC2  | Epithelial cells type1 | 281  |
| TTAGGACAGGTGTTAA-1_CRC2  | Epithelial cells type1 | 410  |
| AACTCTTGTTGCGTTA-1_CRC2  | Epithelial cells type1 | 308  |
| GCAAACCTCATGCCTAA-1_CRC2 | Epithelial cells type1 | 341  |
| TTAGGACGTCCAATA-1_CRC2   | Epithelial cells type1 | 292  |
| ACACCCTTCGCACTCT-1_CRC2  | Epithelial cells type1 | 226  |
| ATAACGCAGGTGATAT-1_CRC2  | Epithelial cells type1 | 171  |
| TTGGAACAGACAGGCT-1_CRC0  | Epithelial cells type1 | 1519 |
| GTCGGGTTCATAGCAC-1_CRC0  | Epithelial cells type1 | 1153 |
| CTACATTCAGCAGTTT-1_CRC0  | Epithelial cells type1 | 915  |
| TCGGGACAGCTGATAA-1_CRC0  | Epithelial cells type1 | 703  |
| AACTGGTTCACCCTCA-1_CRC1  | Epithelial cells type1 | 461  |
| AAGGCAGAGACTCGGA-1_CRC2  | Epithelial cells type1 | 3443 |
| AACTTTCAGGTGATAT-1_CRC2  | Epithelial cells type1 | 3909 |
| TACTCGCTCGATGAGG-1_CRC2  | Epithelial cells type1 | 2286 |
| GTCGGGTTCTCTAAGG-1_CRC0  | Epithelial cells type1 | 1385 |
| CCCTCCTAGGTGACCA-1_CRC2  | Epithelial cells type1 | 2047 |

|                          |                        |      |
|--------------------------|------------------------|------|
| ACGATGTGTCACACGC-1_CRC2  | Epithelial cells type1 | 2031 |
| GCCAAATGTTTGACTG-1_CRC2  | Epithelial cells type1 | 1208 |
| CCTTCCCGTAATCACC-1_CRC2  | Epithelial cells type1 | 944  |
| GTGAAGGAGGCAAAGA-1_CRC2  | Epithelial cells type1 | 1421 |
| GGATGTTTCATGAACCT-1_CRC3 | Epithelial cells type1 | 3074 |
| GTGCAGCTCGGCGCTA-1_CRC1  | Epithelial cells type1 | 3516 |
| TTGGCAACAATCACAC-1_CRC1  | Epithelial cells type1 | 2333 |
| CCTTCCCCATCATCCC-1_CRC1  | Epithelial cells type1 | 2551 |
| CTACACCTCCACTGGG-1_CRC1  | Epithelial cells type1 | 2220 |
| GGACAAGAGTAGCGGT-1_CRC1  | Epithelial cells type1 | 1739 |
| GAAACTCAGCCGATTT-1_CRC1  | Epithelial cells type1 | 729  |
| CGCGGTAGTCCTCCAT-1_CRC2  | Epithelial cells type1 | 1518 |
| TTAGTTCGTTGAGTTC-1_CRC2  | Epithelial cells type1 | 1242 |
| CGATTGATCCTGCCAT-1_CRC1  | Epithelial cells type1 | 1971 |
| CGAGCCATCCCTGACT-1_CRC1  | Epithelial cells type1 | 1363 |
| AACTCTTCAATAAGCA-1_CRC1  | Epithelial cells type1 | 1321 |
| GGCGACTCAATGGTCT-1_CRC1  | Epithelial cells type1 | 990  |
| TCGGTAAAGCTCCTCT-1_CRC1  | Epithelial cells type1 | 1304 |
| TTAGTTCACGTTGGC-1_CRC1   | Epithelial cells type1 | 1480 |
| CACACCTTCTTGAGGT-1_CRC1  | Epithelial cells type1 | 2205 |
| AACTCAGGTTAGAACA-1_CRC1  | Epithelial cells type1 | 1291 |
| GGGACCTTCTCTTGAT-1_CRC1  | Epithelial cells type1 | 1981 |
| CACACAAAGAAACCTA-1_CRC1  | Epithelial cells type1 | 2087 |
| TCAGGTAAGGGCTTGA-1_CRC1  | Epithelial cells type1 | 1726 |
| CATATGGAGCATCATC-1_CRC1  | Epithelial cells type1 | 1415 |
| GGCAATTAGCGGATCA-1_CRC1  | Epithelial cells type1 | 1795 |
| AGCGTATAGTCTCGGC-1_CRC1  | Epithelial cells type1 | 1801 |
| CATCGAAAGCCACCTG-1_CRC1  | Epithelial cells type1 | 1649 |
| CGCTTCACATTCCCTGC-1_CRC1 | Epithelial cells type1 | 1464 |
| GCATACATCTGTTTGT-1_CRC2  | Epithelial cells type1 | 2843 |
| CCGTACTGTCCTCCAT-1_CRC2  | Epithelial cells type1 | 1912 |
| TTTATGCCAAATCCGT-1_CRC2  | Epithelial cells type1 | 1629 |
| ATTGGACCAAATCCGT-1_CRC3  | Epithelial cells type1 | 2031 |
| CGTCACTCAAAGTGCG-1_CRC1  | Epithelial cells type1 | 1949 |
| CACTCCACAAGCGAGT-1_CRC1  | Epithelial cells type1 | 1730 |
| TTCTTAGGTCTCTTTA-1_CRC1  | Epithelial cells type1 | 1548 |
| TGCTACCCATGATCCA-1_CRC3  | Epithelial cells type1 | 1605 |
| GTGGGTCCAGTCAGAG-1_CRC2  | Epithelial cells type1 | 1222 |
| CCGTTCAAGCACGCCT-1_CRC3  | Epithelial cells type1 | 1890 |
| AAGGCAGTCCTTTACA-1_CRC0  | Epithelial cells type2 | 2791 |
| AAGGTTCCACGAAGCA-1_CRC0  | Epithelial cells type2 | 2189 |
| ACATCAGCAAGGCTCC-1_CRC0  | Epithelial cells type2 | 1750 |
| GCAAACCTCAATCGGTT-1_CRC0 | Epithelial cells type2 | 1765 |
| CGTAGCGCAATGGACG-1_CRC0  | Epithelial cells type2 | 1313 |
| CTAATGGTCGGTCTAA-1_CRC0  | Epithelial cells type2 | 1894 |
| CTCGAGGGTCACACGC-1_CRC0  | Epithelial cells type2 | 1642 |
| TTCTCAATCGTATCAG-1_CRC0  | Epithelial cells type2 | 2533 |
| GATCGTAAGCAGCCTC-1_CRC0  | Epithelial cells type2 | 2251 |
| GGATGTTGTTTACTCT-1_CRC0  | Epithelial cells type2 | 2497 |
| CGGAGCTCACGCCAGT-1_CRC0  | Epithelial cells type2 | 2506 |
| ACATACGTCACCCGAG-1_CRC0  | Epithelial cells type2 | 2025 |

|                          |                        |      |
|--------------------------|------------------------|------|
| TACGGTAAGACCCACC-1_CRC0  | Epithelial cells type2 | 1468 |
| CGCGTTTAGTTTCCTT-1_CRC0  | Epithelial cells type2 | 2048 |
| CGGTAAAGTTACGGAG-1_CRC0  | Epithelial cells type2 | 1907 |
| GATCGATAGCGCCTCA-1_CRC0  | Epithelial cells type2 | 1870 |
| ATTATCCTCAGTGCAT-1_CRC0  | Epithelial cells type2 | 2117 |
| ATTGGACGTAGCGCTC-1_CRC0  | Epithelial cells type2 | 1868 |
| AAGACCTTCCAAACTG-1_CRC0  | Epithelial cells type2 | 2635 |
| CATATGGCAAGACGTG-1_CRC0  | Epithelial cells type2 | 2094 |
| CCAGCGACAGGCGATA-1_CRC0  | Epithelial cells type2 | 2391 |
| CTAAGACGTACGACCC-1_CRC0  | Epithelial cells type2 | 2094 |
| GCACTCTAGAATGTTG-1_CRC0  | Epithelial cells type2 | 1671 |
| AGGGATGCAGTTCCT-1_CRC0   | Epithelial cells type2 | 2478 |
| ATAAGAGGTAGGACAC-1_CRC0  | Epithelial cells type2 | 1593 |
| CCCAATCGTCTAGAGG-1_CRC0  | Epithelial cells type2 | 1826 |
| ATCTGCCAGTGTACGG-1_CRC0  | Epithelial cells type2 | 1713 |
| CATCAGAAGAGTTGGC-1_CRC0  | Epithelial cells type2 | 2251 |
| CTCTACGTCAGTTCGA-1_CRC0  | Epithelial cells type2 | 2901 |
| GCATGCGTCATTTGGG-1_CRC0  | Epithelial cells type2 | 2217 |
| TACGGATTCATTTGGG-1_CRC0  | Epithelial cells type2 | 2196 |
| GGAGCAATCCTCCTAG-1_CRC0  | Epithelial cells type2 | 2480 |
| GGTGAAGTCCAGAGGA-1_CRC0  | Epithelial cells type2 | 2322 |
| CAACCTCGTTAAGTAG-1_CRC0  | Epithelial cells type2 | 1900 |
| CATCCACAGGGCTTGA-1_CRC0  | Epithelial cells type2 | 2022 |
| GCGACCAGTTACCAGT-1_CRC0  | Epithelial cells type2 | 1832 |
| CTCTGGTGTCAATACC-1_CRC0  | Epithelial cells type2 | 1870 |
| CCACCTATCACTGGGC-1_CRC0  | Epithelial cells type2 | 1717 |
| ACACCCTCAGCTCCGA-1_CRC0  | Epithelial cells type2 | 1718 |
| CCGTGGAGTTACGACT-1_CRC0  | Epithelial cells type2 | 1708 |
| GGACAAGGTAGCGTAG-1_CRC0  | Epithelial cells type2 | 1850 |
| GGATGTTAGAGCTGCA-1_CRC0  | Epithelial cells type2 | 1666 |
| AACTTTCCATAAGACA-1_CRC0  | Epithelial cells type2 | 1643 |
| AGCCTAAAGTCTTGCA-1_CRC0  | Epithelial cells type2 | 1748 |
| TTGCCGTTTCGAAACT-1_CRC0  | Epithelial cells type2 | 1319 |
| GACCTGGAGATCGGGT-1_CRC0  | Epithelial cells type2 | 1209 |
| CGTCAGGTCTCAAACG-1_CRC0  | Epithelial cells type2 | 1734 |
| CCTAAAGGTGGCTCCA-1_CRC0  | Epithelial cells type2 | 1530 |
| GGTGTTACAAGCGCTC-1_CRC0  | Epithelial cells type2 | 1523 |
| ACGGGTCGTAGGGACT-1_CRC0  | Epithelial cells type2 | 1663 |
| TGACGGCAGAGGTTAT-1_CRC0  | Epithelial cells type2 | 1677 |
| GCTGCAGTCACATGCA-1_CRC0  | Epithelial cells type2 | 2271 |
| CGGGTCAGTCTTGTC-1_CRC0   | Epithelial cells type2 | 1941 |
| AAGCCGCGTCGAGTTT-1_CRC0  | Epithelial cells type2 | 1571 |
| GTCCTCACATTGGTAC-1_CRC0  | Epithelial cells type2 | 2249 |
| ATGCGATCACAAGACG-1_CRC0  | Epithelial cells type2 | 2059 |
| ACTGAGTTCTGCTGCT-1_CRC0  | Epithelial cells type2 | 2173 |
| GCGCAACCAGGGAGAG-1_CRC0  | Epithelial cells type2 | 1366 |
| GTTCCGGGGTATAAACG-1_CRC0 | Epithelial cells type2 | 1475 |
| TTGAACGCATCCAACA-1_CRC0  | Epithelial cells type2 | 1528 |
| AAATGCCCATGAAGTA-1_CRC0  | Epithelial cells type2 | 2076 |
| CATATTCTCGTAGGAG-1_CRC0  | Epithelial cells type2 | 1672 |
| CTGTGCTAGTCGTTTG-1_CRC0  | Epithelial cells type2 | 1276 |

|                          |                        |      |
|--------------------------|------------------------|------|
| ACAGCCGTCTCGCATC-1_CRC0  | Epithelial cells type2 | 1926 |
| GTGCAGCAGTTTGC GT-1_CRC0 | Epithelial cells type2 | 1684 |
| TACCTATAGCCATCGC-1_CRC0  | Epithelial cells type2 | 1405 |
| CAGCTAAAGCCACGCT-1_CRC0  | Epithelial cells type2 | 1718 |
| GTACGTACAGTCGATT-1_CRC0  | Epithelial cells type2 | 1764 |
| ATCACGAAGAGACGAA-1_CRC0  | Epithelial cells type2 | 1733 |
| GTATTCTTCGTAGATC-1_CRC0  | Epithelial cells type2 | 2182 |
| CAGTAACGTAAGCACG-1_CRC0  | Epithelial cells type2 | 2240 |
| TTTACTGTCTTTCCTC-1_CRC0  | Epithelial cells type2 | 1957 |
| CATATGGAGTATGACA-1_CRC0  | Epithelial cells type2 | 1638 |
| CATTATCGTCTTGATG-1_CRC0  | Epithelial cells type2 | 1753 |
| GTTTATTGTGTTTCGAT-1_CRC0 | Epithelial cells type2 | 1665 |
| ATAACGCAGATGCCTT-1_CRC0  | Epithelial cells type2 | 2010 |
| ACTGATGAGATAGGAG-1_CRC0  | Epithelial cells type2 | 2068 |
| GGCTCGAGTAAGAGGA-1_CRC0  | Epithelial cells type2 | 1622 |
| TGAAAGAGTAATAGCA-1_CRC0  | Epithelial cells type2 | 2101 |
| CCTAGCTTCGATAGAA-1_CRC0  | Epithelial cells type2 | 1451 |
| CTGCGGACACCCATTC-1_CRC0  | Epithelial cells type2 | 964  |
| ACACCAATCAGCGATT-1_CRC0  | Epithelial cells type2 | 1975 |
| GCATGCGAGTGCGATG-1_CRC0  | Epithelial cells type2 | 1499 |
| CTGTGCTTCCGAACGC-1_CRC0  | Epithelial cells type2 | 2072 |
| GGGATGATCTTCAACT-1_CRC0  | Epithelial cells type2 | 1851 |
| ACTTTCACAACGATCT-1_CRC0  | Epithelial cells type2 | 1560 |
| ATAACGCAGCAATATG-1_CRC0  | Epithelial cells type2 | 1666 |
| TACACGAGTTGCCTCT-1_CRC0  | Epithelial cells type2 | 1676 |
| CAGTCCTCATAGACTC-1_CRC0  | Epithelial cells type2 | 914  |
| GCGGGTTTCTCGTATT-1_CRC0  | Epithelial cells type2 | 1339 |
| ATAAGAGCAATCTGCA-1_CRC0  | Epithelial cells type2 | 1573 |
| CGTGAGCGTCTCGTTC-1_CRC0  | Epithelial cells type2 | 1807 |
| GACTACATCAACGAAA-1_CRC0  | Epithelial cells type2 | 1765 |
| CACTCCAGTTAAGAAC-1_CRC0  | Epithelial cells type2 | 1349 |
| ACTGATGTCAGCTCGG-1_CRC0  | Epithelial cells type2 | 1070 |
| GCAAACCTCAAGATCC-1_CRC0  | Epithelial cells type2 | 598  |
| GGACATTTCCATGAAC-1_CRC0  | Epithelial cells type2 | 913  |
| CGAGAAGTCGCAAGCC-1_CRC0  | Epithelial cells type2 | 1148 |
| TATGCCCTCTTGAGGT-1_CRC0  | Epithelial cells type2 | 969  |
| GAGGTGAAGTCTCGGC-1_CRC0  | Epithelial cells type2 | 1108 |
| TAGACCACACAAGTAA-1_CRC0  | Epithelial cells type2 | 1510 |
| GATCAGTCACGCTTTC-1_CRC0  | Epithelial cells type2 | 1309 |
| GTCTTCGCACGGCCAT-1_CRC0  | Epithelial cells type2 | 1457 |
| CGGCTAGTCCTCATTA-1_CRC0  | Epithelial cells type2 | 1640 |
| TCGCGAGAGGCAAAGA-1_CRC0  | Epithelial cells type2 | 1347 |
| CACACAATCTTTAGTC-1_CRC0  | Epithelial cells type2 | 866  |
| CTACCCACATGTCGAT-1_CRC0  | Epithelial cells type2 | 964  |
| CTCGGGAAGTCGTACT-1_CRC0  | Epithelial cells type2 | 1281 |
| AGTGGGACATGGTCTA-1_CRC0  | Epithelial cells type2 | 1118 |
| CGGACACAGTAAGTAC-1_CRC0  | Epithelial cells type2 | 1135 |
| TAAGAGAAGATGTTAG-1_CRC0  | Epithelial cells type2 | 1105 |
| CGATGTACATATACCG-1_CRC0  | Epithelial cells type2 | 1642 |
| AAAGATGTCCACGTGG-1_CRC0  | Epithelial cells type2 | 1549 |
| GATCTAGCAGACGCCT-1_CRC0  | Epithelial cells type2 | 1862 |

|                          |                        |      |
|--------------------------|------------------------|------|
| ATCATCTAGGTGATTA-1_CRC0  | Epithelial cells type2 | 1666 |
| AACGTTGAGGAGTCTG-1_CRC0  | Epithelial cells type2 | 1274 |
| CTGAAGTTCCTTGTG-1_CRC0   | Epithelial cells type2 | 1341 |
| CAAGGCCAGCTTAAC-1_CRC0   | Epithelial cells type2 | 1554 |
| TAAGCGTTCTTGGGTA-1_CRC0  | Epithelial cells type2 | 1347 |
| GTGCTTCTCAACACCA-1_CRC0  | Epithelial cells type2 | 1705 |
| TACCTATCACTTCTGC-1_CRC0  | Epithelial cells type2 | 1819 |
| CTCTAATTCATTTGGG-1_CRC0  | Epithelial cells type2 | 2050 |
| GCAGTTATCTTTACAC-1_CRC0  | Epithelial cells type2 | 1408 |
| CTGTTTAAGTGACCT-1_CRC0   | Epithelial cells type2 | 2304 |
| GGACATTGTGGTCCGT-1_CRC0  | Epithelial cells type2 | 1891 |
| AAACCTGGTTGGTAAA-1_CRC0  | Epithelial cells type2 | 2194 |
| GTCTTCGAGGACGAAA-1_CRC0  | Epithelial cells type2 | 2622 |
| CGGACGTGTACAGTGG-1_CRC0  | Epithelial cells type2 | 1706 |
| GATGAGGGTTTGACTG-1_CRC0  | Epithelial cells type2 | 1590 |
| CATCCACAGGAGTTGC-1_CRC0  | Epithelial cells type2 | 1436 |
| AACTCTTGTCTAGCGC-1_CRC0  | Epithelial cells type2 | 1457 |
| CGTCTACCAGTCGTGC-1_CRC0  | Epithelial cells type2 | 1723 |
| CGATCGGAGCCACCTG-1_CRC0  | Epithelial cells type2 | 2031 |
| ATGAGGGTCGTCTGCT-1_CRC0  | Epithelial cells type2 | 1459 |
| TGCCCATCACGGTGTC-1_CRC0  | Epithelial cells type2 | 1402 |
| CAAGGCCAGATGCCTT-1_CRC0  | Epithelial cells type2 | 1760 |
| GCTGCGACATTAGCCA-1_CRC0  | Epithelial cells type2 | 1914 |
| AACTTTCAGTGGGTTG-1_CRC0  | Epithelial cells type2 | 1827 |
| ACTTACTAGAGACTAT-1_CRC0  | Epithelial cells type2 | 1373 |
| TTAGGCACATTCAGG-1_CRC0   | Epithelial cells type2 | 1689 |
| GTATTCTTCAGTTAGC-1_CRC0  | Epithelial cells type2 | 2020 |
| TGCGTGGCACCACCAG-1_CRC0  | Epithelial cells type2 | 1120 |
| CAGCAGCAGATACACA-1_CRC0  | Epithelial cells type2 | 1318 |
| CCTCTGACATGTCTCC-1_CRC0  | Epithelial cells type2 | 1209 |
| TTCTACAAGTTTGCGT-1_CRC0  | Epithelial cells type2 | 1645 |
| AGCATACAGAGTAAGG-1_CRC0  | Epithelial cells type2 | 1786 |
| GATCTAGAGCGATATA-1_CRC0  | Epithelial cells type2 | 1793 |
| AGTGTCAGTCAACATC-1_CRC0  | Epithelial cells type2 | 1493 |
| TAAACCGCATTGGTAC-1_CRC0  | Epithelial cells type2 | 1370 |
| TACTCATGTTGGACCC-1_CRC0  | Epithelial cells type2 | 1145 |
| AACTTTCAGGCTGAA-1_CRC0   | Epithelial cells type2 | 1752 |
| GGGATGAAGCCGGTAA-1_CRC0  | Epithelial cells type2 | 1831 |
| CACATTTAGCTGTCTA-1_CRC0  | Epithelial cells type2 | 1074 |
| CACACTCGTAACGCGA-1_CRC0  | Epithelial cells type2 | 1632 |
| TTTGTACACAGGGTATG-1_CRC0 | Epithelial cells type2 | 1691 |
| TGGGAAGCAGGCGATA-1_CRC0  | Epithelial cells type2 | 2236 |
| CACATAGCAAAGTGTCT-1_CRC0 | Epithelial cells type2 | 1928 |
| CATTCGCTCTCAAGTG-1_CRC0  | Epithelial cells type2 | 1641 |
| AGCTTGAAGACGACGT-1_CRC0  | Epithelial cells type2 | 1886 |
| CATATTCTCGGAGGTA-1_CRC0  | Epithelial cells type2 | 1191 |
| TCACGAAAGCCGGTAA-1_CRC0  | Epithelial cells type2 | 2188 |
| CGCGTTTCAGGGTACA-1_CRC0  | Epithelial cells type2 | 1764 |
| CGGACTGAGGCTCAGA-1_CRC0  | Epithelial cells type2 | 2144 |
| ACATCAGGTCCCTACT-1_CRC0  | Epithelial cells type2 | 2407 |
| CATCAGAGTGTGACGA-1_CRC0  | Epithelial cells type2 | 1798 |

|                          |                        |      |
|--------------------------|------------------------|------|
| CGTGTCTCACAACGCC-1_CRC0  | Epithelial cells type2 | 1967 |
| CTACACCGTCCAGTAT-1_CRC0  | Epithelial cells type2 | 1766 |
| GGGTCTGAGCCGTCGT-1_CRC0  | Epithelial cells type2 | 1916 |
| CCACGGATCGTGACAT-1_CRC0  | Epithelial cells type2 | 2076 |
| GGGTTGCCACAAGACG-1_CRC0  | Epithelial cells type2 | 2108 |
| TTATGCTTCAGCATGT-1_CRC0  | Epithelial cells type2 | 1792 |
| ACATCAGAGTGTGAA-1_CRC0   | Epithelial cells type2 | 1572 |
| CTAGCCTCAAGAAAGG-1_CRC0  | Epithelial cells type2 | 1573 |
| TCAGGTATCTTGAGGT-1_CRC0  | Epithelial cells type2 | 1907 |
| CCTTTCTCACGAAGCA-1_CRC0  | Epithelial cells type2 | 1495 |
| TGGCGCATCATCATT-1_CRC0   | Epithelial cells type2 | 1772 |
| GGAAAGCAGGAGTAGA-1_CRC0  | Epithelial cells type2 | 2164 |
| GTTCTCGGTCAAAGCG-1_CRC0  | Epithelial cells type2 | 2035 |
| CAGCTAAGTTACGTCA-1_CRC0  | Epithelial cells type2 | 1625 |
| AACTCTTCAGGATCGA-1_CRC0  | Epithelial cells type2 | 1287 |
| CACACCTGTTGATTCG-1_CRC0  | Epithelial cells type2 | 1181 |
| ACTGAACGTGCAACTT-1_CRC0  | Epithelial cells type2 | 1936 |
| ACCAGTAGTAGTACCT-1_CRC0  | Epithelial cells type2 | 1639 |
| GTCGTAATCCGGGTGT-1_CRC0  | Epithelial cells type2 | 1256 |
| CCAATCCTCCACGAAT-1_CRC0  | Epithelial cells type2 | 1318 |
| GTTCTGGGAGATATGGT-1_CRC0 | Epithelial cells type2 | 1004 |
| GCACATACACGTCAGC-1_CRC0  | Epithelial cells type2 | 1998 |
| AGATTGCGTGGTTTCA-1_CRC0  | Epithelial cells type2 | 929  |
| CTCGTCATCACGCATA-1_CRC0  | Epithelial cells type2 | 1722 |
| ACGAGGAAGCACGCCT-1_CRC0  | Epithelial cells type2 | 1339 |
| GCAGTTAGTACAAGTA-1_CRC0  | Epithelial cells type2 | 1253 |
| TGCCCTACATTACCTT-1_CRC0  | Epithelial cells type2 | 1460 |
| GTGTGCGTCTAACCGA-1_CRC0  | Epithelial cells type2 | 1124 |
| ATTGGACGTAAACACA-1_CRC0  | Epithelial cells type2 | 1023 |
| GAAGCAGCAAGCGAGT-1_CRC0  | Epithelial cells type2 | 1492 |
| CATCGGGTCCACGACG-1_CRC0  | Epithelial cells type2 | 1461 |
| ACGGGCTGTATGCTTG-1_CRC0  | Epithelial cells type2 | 1291 |
| CACACCTTCCTAAGTG-1_CRC0  | Epithelial cells type2 | 1517 |
| CGTGTCTGTTGTTTGG-1_CRC0  | Epithelial cells type2 | 1334 |
| CACAGGCCACAAGACG-1_CRC0  | Epithelial cells type2 | 976  |
| GTAAGTGAAGGAAACA-1_CRC0  | Epithelial cells type2 | 1201 |
| ATGCGATAGTATCTCG-1_CRC0  | Epithelial cells type2 | 1329 |
| TACAGTGGTTCGAACAG-1_CRC0 | Epithelial cells type2 | 1152 |
| CCTCTGAGTAGTGAAT-1_CRC0  | Epithelial cells type2 | 952  |
| CCGTTTCATCATCGATG-1_CRC0 | Epithelial cells type2 | 1282 |
| TCACGAAAGCAGCCTC-1_CRC0  | Epithelial cells type2 | 1205 |
| ACTGAGTAGGCCCTCA-1_CRC0  | Epithelial cells type2 | 1115 |
| ACTTGTTAGACCCACC-1_CRC0  | Epithelial cells type2 | 1194 |
| CGCTTCATCCACGTGG-1_CRC0  | Epithelial cells type2 | 1195 |
| GATGCTATCCAAACAC-1_CRC0  | Epithelial cells type2 | 1903 |
| CTGAAACTCGGCGCTA-1_CRC0  | Epithelial cells type2 | 1092 |
| GTAAGTGCACCGCTAG-1_CRC0  | Epithelial cells type2 | 1272 |
| GTGCAGCTCCACGTTC-1_CRC0  | Epithelial cells type2 | 1394 |
| ACGCAGCCAGTTCCT-1_CRC0   | Epithelial cells type2 | 1730 |
| CAGCTAAAGATCCCGC-1_CRC0  | Epithelial cells type2 | 1588 |
| GCAATCAGTAGGGACT-1_CRC0  | Epithelial cells type2 | 1899 |

|                         |                        |      |
|-------------------------|------------------------|------|
| TGACTAGGTAATCACC-1_CRC0 | Epithelial cells type2 | 1890 |
| CCTTCCCAGACTGTAA-1_CRC0 | Epithelial cells type2 | 2188 |
| CAGCAGCCATGCAACT-1_CRC0 | Epithelial cells type2 | 1710 |
| TCCACACCACATGTGT-1_CRC0 | Epithelial cells type2 | 1135 |
| GCATGTAAGTGGAGAA-1_CRC0 | Epithelial cells type2 | 2104 |
| ACCCACTCAGCAGTTT-1_CRC0 | Epithelial cells type2 | 2238 |
| CCGTGGATCACCATAG-1_CRC0 | Epithelial cells type2 | 1627 |
| TGAGAGGGTTCGGGCT-1_CRC0 | Epithelial cells type2 | 2272 |
| AGATTGCTCGGATGTT-1_CRC0 | Epithelial cells type2 | 1900 |
| TGGACGCGTGGCGAAT-1_CRC0 | Epithelial cells type2 | 1740 |
| GAAATGAGTGAGCGAT-1_CRC0 | Epithelial cells type2 | 2042 |
| GGCTGGTGTCTCCACT-1_CRC0 | Epithelial cells type2 | 2428 |
| GGTATTGCAGCTTAAC-1_CRC0 | Epithelial cells type2 | 1836 |
| CGCGTTTAGACGCACA-1_CRC0 | Epithelial cells type2 | 2153 |
| CTCTAATCAATAGCGG-1_CRC0 | Epithelial cells type2 | 2246 |
| AGTCTTTCACCTGGTG-1_CRC0 | Epithelial cells type2 | 2243 |
| CCTAGCTAGCAACGGT-1_CRC0 | Epithelial cells type2 | 2052 |
| GGGAATGTCAGGCCCA-1_CRC0 | Epithelial cells type2 | 2193 |
| ATTTCTGCATGCCGA-1_CRC0  | Epithelial cells type2 | 1850 |
| GTCTCGTTCGAGAACG-1_CRC0 | Epithelial cells type2 | 2008 |
| TCACGAAAGTGGGATC-1_CRC0 | Epithelial cells type2 | 2474 |
| TGGCCAGTCTAACCGA-1_CRC0 | Epithelial cells type2 | 2399 |
| TCTGGAACACGGCGTT-1_CRC0 | Epithelial cells type2 | 2329 |
| GAATAAGTCTTGTCAT-1_CRC0 | Epithelial cells type2 | 1836 |
| GGGAGATTCTTCCTTC-1_CRC0 | Epithelial cells type2 | 1965 |
| TGCTGCTCAACACCCG-1_CRC0 | Epithelial cells type2 | 2163 |
| GTGTTAGAGCCGATTT-1_CRC0 | Epithelial cells type2 | 2271 |
| AACTGGTTCACATGCA-1_CRC0 | Epithelial cells type2 | 1356 |
| CGCTGGAAGTCCCACG-1_CRC0 | Epithelial cells type2 | 1415 |
| GGGACCTAGAATCTCC-1_CRC0 | Epithelial cells type2 | 2259 |
| TCTTCGGTCATCACCC-1_CRC0 | Epithelial cells type2 | 1759 |
| CGTAGGCCACCCAGTG-1_CRC0 | Epithelial cells type2 | 1567 |
| GTGCATACATTATCTC-1_CRC0 | Epithelial cells type2 | 1286 |
| TCTCATATCAGAGCTT-1_CRC0 | Epithelial cells type2 | 1231 |
| GTCTTCGCAATCGAAA-1_CRC0 | Epithelial cells type2 | 1762 |
| CTGCTGTCATATGCTG-1_CRC0 | Epithelial cells type2 | 1550 |
| TTTACTGAGACGCTTT-1_CRC0 | Epithelial cells type2 | 1761 |
| ACGGGTCCAGACGCTC-1_CRC0 | Epithelial cells type2 | 1763 |
| TCAACGAGTAAGAGGA-1_CRC0 | Epithelial cells type2 | 1885 |
| CCCAGTTGTTCGAATC-1_CRC0 | Epithelial cells type2 | 1934 |
| AGCCTAATCTCGATGA-1_CRC0 | Epithelial cells type2 | 1647 |
| CCTTCCCTCGAACTGT-1_CRC0 | Epithelial cells type2 | 1847 |
| AGCGTCGGTTATCACG-1_CRC0 | Epithelial cells type2 | 1638 |
| TACTTGTCACCAGCAC-1_CRC1 | Epithelial cells type2 | 2339 |
| AACTCCCGTTAAGGGC-1_CRC0 | Epithelial cells type2 | 1679 |
| TCACGAAGTAACGCGA-1_CRC0 | Epithelial cells type2 | 1917 |
| AATCCAGGTTACGCGC-1_CRC0 | Epithelial cells type2 | 2099 |
| CACAACTCGCGTAGC-1_CRC0  | Epithelial cells type2 | 2995 |
| GGGTCTGGTGAGTGAC-1_CRC0 | Epithelial cells type2 | 1465 |
| TGCCAAACACGCATCG-1_CRC0 | Epithelial cells type2 | 1146 |
| TGCGGGTCAAGGTTCT-1_CRC0 | Epithelial cells type2 | 1641 |

|                          |                        |      |
|--------------------------|------------------------|------|
| TCGAGGCCATGTTCCC-1_CRC0  | Epithelial cells type2 | 1291 |
| AGCGGTCAGCCGTCGT-1_CRC0  | Epithelial cells type2 | 1211 |
| CTCATTACAATGAAAC-1_CRC0  | Epithelial cells type2 | 1315 |
| CAACTAGGTCATCCCT-1_CRC0  | Epithelial cells type2 | 1800 |
| ACTGAACCAGGACCCT-1_CRC0  | Epithelial cells type2 | 2042 |
| CAGTCCTTCAACGAAA-1_CRC0  | Epithelial cells type2 | 2367 |
| ACTTACTGTTTAAGCC-1_CRC0  | Epithelial cells type2 | 1499 |
| CTTTGCGGTAATTGGA-1_CRC0  | Epithelial cells type2 | 2013 |
| TTTGCGCAGGTAGCTG-1_CRC0  | Epithelial cells type2 | 1926 |
| GCCTCTAGTTAAGGGC-1_CRC0  | Epithelial cells type2 | 1317 |
| CGCCAAGTCTTGTTTG-1_CRC0  | Epithelial cells type2 | 1564 |
| TCATTACTCCATGCTC-1_CRC0  | Epithelial cells type2 | 1585 |
| CATCCACTCGCCTGTT-1_CRC0  | Epithelial cells type2 | 1920 |
| ACGAGCCGTAGATTAG-1_CRC0  | Epithelial cells type2 | 1530 |
| TCTGGAACAGGAACGT-1_CRC0  | Epithelial cells type2 | 1810 |
| ATTTCTGGTGTGAGG-1_CRC0   | Epithelial cells type2 | 1185 |
| CTGTGCTAGACCGGAT-1_CRC0  | Epithelial cells type2 | 1177 |
| AAGCCGCTCTTCCTTC-1_CRC0  | Epithelial cells type2 | 2336 |
| TGGTTAGGTCATCCCT-1_CRC0  | Epithelial cells type2 | 2015 |
| TGTATTGAGACGCTTT-1_CRC0  | Epithelial cells type2 | 1811 |
| CGTTGGGTCTACTTAC-1_CRC0  | Epithelial cells type2 | 1253 |
| CGACTTCAGCGCTCCA-1_CRC0  | Epithelial cells type2 | 1275 |
| TCTTCGGTCTAACTTC-1_CRC0  | Epithelial cells type2 | 1799 |
| GATTCAGAGTGTGGCA-1_CRC0  | Epithelial cells type2 | 1458 |
| CAGCTAAGTAAGTGGC-1_CRC0  | Epithelial cells type2 | 1161 |
| CCCTCCTCATGCTGGC-1_CRC0  | Epithelial cells type2 | 944  |
| CTACCCAGTCCATCCT-1_CRC0  | Epithelial cells type2 | 1679 |
| AAGACCTAGCAGATCG-1_CRC0  | Epithelial cells type2 | 1924 |
| CCGTTGAGTGATGCC-1_CRC0   | Epithelial cells type2 | 1642 |
| TAAGCGTTCTTGACGA-1_CRC0  | Epithelial cells type2 | 2398 |
| CTGCGGACATCGGAAG-1_CRC0  | Epithelial cells type2 | 1127 |
| ATCCACCCACGGTAGA-1_CRC0  | Epithelial cells type2 | 1406 |
| CCCTCCTCATACGCCG-1_CRC0  | Epithelial cells type2 | 1224 |
| GTCATTTAGTGGTAAT-1_CRC0  | Epithelial cells type2 | 1117 |
| TGCACCTCAAAGCAAT-1_CRC0  | Epithelial cells type2 | 1256 |
| TTGAACGTCGAGAGCA-1_CRC0  | Epithelial cells type2 | 2011 |
| ACTGAACCACATGGGA-1_CRC0  | Epithelial cells type2 | 1019 |
| CCTTCGACACACATGT-1_CRC0  | Epithelial cells type2 | 1464 |
| TGAGCATAGAATAGGG-1_CRC0  | Epithelial cells type2 | 1490 |
| TGTCCCAAGGCATTGG-1_CRC0  | Epithelial cells type2 | 2068 |
| TTTGCGCAGTATGACA-1_CRC0  | Epithelial cells type2 | 3019 |
| CCGTGGAGTTACGTCA-1_CRC0  | Epithelial cells type2 | 2230 |
| TACTCGCCAGTACACT-1_CRC0  | Epithelial cells type2 | 2351 |
| CGAACATGTACCAGTT-1_CRC0  | Epithelial cells type2 | 2129 |
| AGAGCTTGTTTCAGGCC-1_CRC0 | Epithelial cells type2 | 1905 |
| ATCCGAAGTTTGACTG-1_CRC0  | Epithelial cells type2 | 2024 |
| ATCATGGAGACAATAC-1_CRC0  | Epithelial cells type2 | 2454 |
| GGTGCCTTCAAGCCTA-1_CRC0  | Epithelial cells type2 | 1386 |
| TACTCGCGTCTCATCC-1_CRC0  | Epithelial cells type2 | 2132 |
| AACTTTCTCTGATACG-1_CRC0  | Epithelial cells type2 | 2270 |
| CCACTACAGTCGATAA-1_CRC0  | Epithelial cells type2 | 2114 |



|                          |                        |      |
|--------------------------|------------------------|------|
| CTCGAGGAGGCTAGCA-1_CRC0  | Epithelial cells type2 | 2409 |
| TCAGCAATCTTGTCAT-1_CRC0  | Epithelial cells type2 | 2644 |
| TTTACTGAGTGGGCTA-1_CRC0  | Epithelial cells type2 | 1636 |
| GTGCAGCCAGAAGCAC-1_CRC0  | Epithelial cells type2 | 1914 |
| TGTTCCGTCGCGCCAA-1_CRC0  | Epithelial cells type2 | 1833 |
| CGGTTAATCGAATCCA-1_CRC1  | Epithelial cells type2 | 4091 |
| TACACGATCCTCATTA-1_CRC1  | Epithelial cells type2 | 969  |
| GGGCACTCAAGGACTG-1_CRC1  | Epithelial cells type2 | 765  |
| GACGGCTCAGCATGAG-1_CRC1  | Epithelial cells type2 | 1217 |
| TGCGCAGCACAAGACG-1_CRC1  | Epithelial cells type2 | 967  |
| TGTATTCCACCCATGG-1_CRC1  | Epithelial cells type2 | 922  |
| AAGGAGCGTGATGCCC-1_CRC1  | Epithelial cells type2 | 1123 |
| TTTGCGCTCGCTGATA-1_CRC1  | Epithelial cells type2 | 1036 |
| CCCAGTTGTTCCACAA-1_CRC1  | Epithelial cells type2 | 1445 |
| AACGTTGTCGGATGTT-1_CRC1  | Epithelial cells type2 | 795  |
| TACTTACAGACAAGCC-1_CRC1  | Epithelial cells type2 | 760  |
| TATCAGGTCAAGGTAA-1_CRC1  | Epithelial cells type2 | 1239 |
| CGTAGCGGTAGAGTGC-1_CRC1  | Epithelial cells type2 | 1394 |
| CTCATTACACAGAGGT-1_CRC1  | Epithelial cells type2 | 984  |
| TCTGAGATCCCTCTTT-1_CRC1  | Epithelial cells type2 | 1093 |
| GCGGGTTTCTACCAGA-1_CRC1  | Epithelial cells type2 | 2089 |
| GAAATGACATGTTCGAT-1_CRC1 | Epithelial cells type2 | 1390 |
| TCATTTGGTAGAGCTG-1_CRC1  | Epithelial cells type2 | 1686 |
| CCGGGATGTGAAATCA-1_CRC1  | Epithelial cells type2 | 1455 |
| GAAACTCTCCTTGACC-1_CRC1  | Epithelial cells type2 | 1411 |
| ACGGGCTGTACCCAAT-1_CRC1  | Epithelial cells type2 | 1462 |
| CGCGTTTCAGGAACGT-1_CRC1  | Epithelial cells type2 | 1280 |
| GCATGTACAGTAAGCG-1_CRC1  | Epithelial cells type2 | 1073 |
| CTACCCACATTACGAC-1_CRC1  | Epithelial cells type2 | 1454 |
| TTCCAGCAAGTTAAG-1_CRC1   | Epithelial cells type2 | 1617 |
| ATGGGAGTCGTCGTTT-1_CRC1  | Epithelial cells type2 | 1089 |
| AGTGGGATCTTACCTA-1_CRC1  | Epithelial cells type2 | 1888 |
| CTGATAGGTGATGTCT-1_CRC1  | Epithelial cells type2 | 1669 |
| ACTGTCCCACCACGTG-1_CRC1  | Epithelial cells type2 | 2135 |
| CTGTTTAAGGCATGTG-1_CRC1  | Epithelial cells type2 | 1423 |
| AGATCTGAGATATGGT-1_CRC1  | Epithelial cells type2 | 1043 |
| ATCTGCCAGGAACTGC-1_CRC1  | Epithelial cells type2 | 1450 |
| GACGGCTCATCGATGT-1_CRC1  | Epithelial cells type2 | 1216 |
| CCTTACGGTTAAAGTG-1_CRC1  | Epithelial cells type2 | 1469 |
| TTAGGCAGTAGGACAC-1_CRC1  | Epithelial cells type2 | 1639 |
| TGGTTCCTCCCTCAGT-1_CRC1  | Epithelial cells type2 | 1468 |
| TACGGGCCAAGCGCTC-1_CRC1  | Epithelial cells type2 | 1133 |
| TCGTACCTCAAGGCTT-1_CRC1  | Epithelial cells type2 | 1511 |
| AGGTCCGAGGACGAAA-1_CRC1  | Epithelial cells type2 | 1334 |
| CAGAGAGAGCGTGAGT-1_CRC1  | Epithelial cells type2 | 1196 |
| CAGTCCTAGTAGTGCG-1_CRC1  | Epithelial cells type2 | 1373 |
| CCGTTCAAGTTACCCA-1_CRC1  | Epithelial cells type2 | 924  |
| CGTTGGGCAATCACAC-1_CRC1  | Epithelial cells type2 | 1719 |
| ACCAGTACATCAGTAC-1_CRC1  | Epithelial cells type2 | 1328 |
| GCATGATCAAGTAGTA-1_CRC1  | Epithelial cells type2 | 1351 |
| GCGAGAAAGCCAGTAG-1_CRC1  | Epithelial cells type2 | 1778 |

|                          |                        |      |
|--------------------------|------------------------|------|
| ACCCACTTCCTTGCCA-1_CRC1  | Epithelial cells type2 | 1465 |
| GTATTCTCATTCGACA-1_CRC1  | Epithelial cells type2 | 1616 |
| TCGCGAGGTATGCTTG-1_CRC1  | Epithelial cells type2 | 1039 |
| CCTTCGACAGGAATGC-1_CRC1  | Epithelial cells type2 | 1164 |
| CTACGTCTCGAGGTAG-1_CRC1  | Epithelial cells type2 | 1394 |
| TCGAGGCGTCGGCACT-1_CRC1  | Epithelial cells type2 | 1260 |
| TGAAAGATCTGTGCAA-1_CRC1  | Epithelial cells type2 | 1862 |
| GACCAATCAAAGGAAG-1_CRC1  | Epithelial cells type2 | 1242 |
| TACGGTACAGTCTTCC-1_CRC1  | Epithelial cells type2 | 1484 |
| AGGTCCGCAGCTGTAT-1_CRC1  | Epithelial cells type2 | 1839 |
| TGCTACCGTAATAGCA-1_CRC1  | Epithelial cells type2 | 1891 |
| CTTAAGTGTCCACAA-1_CRC1   | Epithelial cells type2 | 1406 |
| TAAGCGTCAGCGAACA-1_CRC1  | Epithelial cells type2 | 1313 |
| GATTCAGCACATTCGA-1_CRC1  | Epithelial cells type2 | 1747 |
| GAGTCCGCATCCTAGA-1_CRC1  | Epithelial cells type2 | 1558 |
| TCATTTGGTCTACCTC-1_CRC1  | Epithelial cells type2 | 1647 |
| AACTCAGCACGCATCG-1_CRC1  | Epithelial cells type2 | 1339 |
| CAAGATCGTCCGTAA-1_CRC1   | Epithelial cells type2 | 1150 |
| AACTGGTTCAACACAC-1_CRC1  | Epithelial cells type2 | 1633 |
| GATCTAGCACGCGAAA-1_CRC1  | Epithelial cells type2 | 1686 |
| CACAGGCGTCGCGGTT-1_CRC1  | Epithelial cells type2 | 1586 |
| TCACAAGGTGCCTGTG-1_CRC1  | Epithelial cells type2 | 1920 |
| TGGCCAGCAAGAGTCG-1_CRC1  | Epithelial cells type2 | 1706 |
| CCACTACTCCACGTGG-1_CRC1  | Epithelial cells type2 | 1421 |
| TGTTCCGTCATCGGAT-1_CRC1  | Epithelial cells type2 | 1949 |
| ACACCGGAGGTAGCTG-1_CRC1  | Epithelial cells type2 | 1484 |
| CAGGTGCCATCACGTA-1_CRC1  | Epithelial cells type2 | 1526 |
| CTGTTTAGTCGGCATC-1_CRC1  | Epithelial cells type2 | 1976 |
| GTAAGTGGTTGACGTT-1_CRC1  | Epithelial cells type2 | 1802 |
| CACAGGCGTTACGGAG-1_CRC1  | Epithelial cells type2 | 1723 |
| CTACCCAGTTCGCTAA-1_CRC1  | Epithelial cells type2 | 2228 |
| TTCTTAGAGACGCACA-1_CRC1  | Epithelial cells type2 | 2325 |
| TCAGATGTCGGATGGA-1_CRC1  | Epithelial cells type2 | 1610 |
| CGTCTACGTGCGAAAC-1_CRC1  | Epithelial cells type2 | 1981 |
| GAATAAGAGTGAACAT-1_CRC1  | Epithelial cells type2 | 1166 |
| GTGCTTCGTTTGCATG-1_CRC1  | Epithelial cells type2 | 1302 |
| CATGACACAGACACTT-1_CRC1  | Epithelial cells type2 | 2039 |
| TAAACCGCACACATGT-1_CRC1  | Epithelial cells type2 | 2278 |
| CCACTACTCCACGAAT-1_CRC1  | Epithelial cells type2 | 1912 |
| CGCGTTTTCTTTTCGG-1_CRC1  | Epithelial cells type2 | 1630 |
| ACACCGGTCCTTCAACT-1_CRC1 | Epithelial cells type2 | 1182 |
| AGCCTAAAGCTCAACT-1_CRC1  | Epithelial cells type2 | 1299 |
| ACTGTCCCAGTGAGTG-1_CRC1  | Epithelial cells type2 | 1552 |
| GACTGCGAGCACCGTC-1_CRC1  | Epithelial cells type2 | 1969 |
| CAAGAAACAAAGTCAA-1_CRC1  | Epithelial cells type2 | 1867 |
| CTGAAACTCCCGACTT-1_CRC1  | Epithelial cells type2 | 1906 |
| CGTTCTGTCAGCCTAA-1_CRC1  | Epithelial cells type2 | 1459 |
| CACAAACGTCAACTGT-1_CRC1  | Epithelial cells type2 | 1063 |
| CTCGAGGCAGGTTTCA-1_CRC1  | Epithelial cells type2 | 1072 |
| GGCTCGACAGCGTCCA-1_CRC1  | Epithelial cells type2 | 834  |
| GATCAGTTCTATGTGG-1_CRC1  | Epithelial cells type2 | 1415 |

|                          |                        |      |
|--------------------------|------------------------|------|
| TGCACCTAGCTGAAAT-1_CRC1  | Epithelial cells type2 | 1306 |
| GTCAAGTGTATGAAAC-1_CRC1  | Epithelial cells type2 | 1198 |
| TGGTTCCGTGCAGACA-1_CRC1  | Epithelial cells type2 | 1520 |
| GATGAGGCACTGAAGG-1_CRC1  | Epithelial cells type2 | 1673 |
| ACGCCGACAGGTTTCA-1_CRC1  | Epithelial cells type2 | 1364 |
| GAGTCCGGTAGGCTGA-1_CRC1  | Epithelial cells type2 | 1202 |
| CACAGTAAGTTTCCTT-1_CRC1  | Epithelial cells type2 | 2421 |
| AGCTCTCAGTGTGAAT-1_CRC1  | Epithelial cells type2 | 1881 |
| CTCACACAGCCATCGC-1_CRC1  | Epithelial cells type2 | 1497 |
| TCCACACCAGATGAGC-1_CRC1  | Epithelial cells type2 | 1529 |
| CACACTCAGTTTAGGA-1_CRC1  | Epithelial cells type2 | 1693 |
| ACATCAGGTTCTCATT-1_CRC1  | Epithelial cells type2 | 1367 |
| CACATTTTCCCTGACT-1_CRC1  | Epithelial cells type2 | 1690 |
| AACCATGCAGACAAAT-1_CRC1  | Epithelial cells type2 | 1250 |
| CTCCTAGGTTCTGAAC-1_CRC1  | Epithelial cells type2 | 1325 |
| AGCAGCCTCTCTGTCTG-1_CRC1 | Epithelial cells type2 | 1571 |
| CTGAAGTTCGTAGGAG-1_CRC1  | Epithelial cells type2 | 1125 |
| GAACATCGTCATCCCT-1_CRC1  | Epithelial cells type2 | 1773 |
| TGGCTGGAGGACACCA-1_CRC1  | Epithelial cells type2 | 924  |
| TACACGATCTGGCGTG-1_CRC1  | Epithelial cells type2 | 1241 |
| CCTTTCTAGGCGTACA-1_CRC1  | Epithelial cells type2 | 1558 |
| CACACAAAGGTAAACT-1_CRC1  | Epithelial cells type2 | 1241 |
| AGCTTGATCCATGAAC-1_CRC1  | Epithelial cells type2 | 1441 |
| TGAAAGAAGATAGTCA-1_CRC1  | Epithelial cells type2 | 1258 |
| CGGACACAGACTACAA-1_CRC1  | Epithelial cells type2 | 1187 |
| GTGGGTCAGTAGTGCG-1_CRC1  | Epithelial cells type2 | 1574 |
| AGCGGTCGTAAAGGGC-1_CRC1  | Epithelial cells type2 | 1294 |
| ACATGGTTCCCTCAGT-1_CRC1  | Epithelial cells type2 | 659  |
| GTCACGGTCGTACGGC-1_CRC1  | Epithelial cells type2 | 1253 |
| CCCAATCGTATAGTAG-1_CRC1  | Epithelial cells type2 | 1967 |
| TCTGAGACAACACGCC-1_CRC1  | Epithelial cells type2 | 1472 |
| ATCTGCCTCCTGTAGA-1_CRC1  | Epithelial cells type2 | 942  |
| GCATGTAGTGAAGGCT-1_CRC1  | Epithelial cells type2 | 1171 |
| CTCCTAGTCGGCGCTA-1_CRC1  | Epithelial cells type2 | 1410 |
| TGACTAGGTAGCTCCG-1_CRC1  | Epithelial cells type2 | 1761 |
| GTCGTAAAGTGTTAAGA-1_CRC1 | Epithelial cells type2 | 1448 |
| CGGACGTCATCCGCGA-1_CRC1  | Epithelial cells type2 | 1224 |
| CGTAGGCCATTGGTAC-1_CRC1  | Epithelial cells type2 | 1082 |
| CAGCTAAAGACCACGA-1_CRC1  | Epithelial cells type2 | 1543 |
| CTAGTGAAGGTGCTAG-1_CRC1  | Epithelial cells type2 | 1463 |
| GCACTCTAGGTAGCTG-1_CRC1  | Epithelial cells type2 | 1002 |
| TATTACCAGAGCCCAA-1_CRC1  | Epithelial cells type2 | 1280 |
| GCTGCTTTCAACGGCC-1_CRC1  | Epithelial cells type2 | 1525 |
| GTAGTCAAGCTAACAA-1_CRC1  | Epithelial cells type2 | 1447 |
| AAACCTGAGCGAAGGG-1_CRC1  | Epithelial cells type2 | 1192 |
| CGTAGCGTCAACTCTT-1_CRC1  | Epithelial cells type2 | 1021 |
| CTGTGCTCAGTTCATG-1_CRC1  | Epithelial cells type2 | 1121 |
| CAGTCCTCATACCATG-1_CRC1  | Epithelial cells type2 | 1296 |
| AGATCTGAGGTGGGTT-1_CRC1  | Epithelial cells type2 | 902  |
| AGTGAGGCACAGACAG-1_CRC1  | Epithelial cells type2 | 908  |
| CGCGGTAAGCGAGAAA-1_CRC1  | Epithelial cells type2 | 1530 |

|                          |                        |      |
|--------------------------|------------------------|------|
| GCATGATCACATCCAA-1_CRC1  | Epithelial cells type2 | 1295 |
| TAGTGGTTCCCTTGTG-1_CRC1  | Epithelial cells type2 | 1779 |
| ATCCGAATCCTTTCTC-1_CRC1  | Epithelial cells type2 | 1684 |
| ATGAGGGAGTCAAGGC-1_CRC1  | Epithelial cells type2 | 1138 |
| CAGCTGGGTGCAGACA-1_CRC1  | Epithelial cells type2 | 1800 |
| GCTGGGTAGCGATGAC-1_CRC1  | Epithelial cells type2 | 1113 |
| TGTCCCAAGCTAGTCT-1_CRC1  | Epithelial cells type2 | 1700 |
| CTTGGCTGTGGCAAAC-1_CRC1  | Epithelial cells type2 | 1327 |
| GTCTTCGGTTACGACT-1_CRC1  | Epithelial cells type2 | 1441 |
| CTCGGAGTCAGGTTCA-1_CRC1  | Epithelial cells type2 | 1290 |
| ATCCACCTCACGCATA-1_CRC1  | Epithelial cells type2 | 1490 |
| GTGCATAGTGCTGGT-1_CRC1   | Epithelial cells type2 | 1122 |
| CTGATAGCACAGCGTC-1_CRC1  | Epithelial cells type2 | 1244 |
| GAGGTGACAGACGTAG-1_CRC1  | Epithelial cells type2 | 1131 |
| GGATGTTTCGGTCCGA-1_CRC1  | Epithelial cells type2 | 1313 |
| TGTTCCGAGGGATCTG-1_CRC1  | Epithelial cells type2 | 1533 |
| CCGTTC AAGCTGAACG-1_CRC1 | Epithelial cells type2 | 1370 |
| TCTCATACATAGTAAG-1_CRC1  | Epithelial cells type2 | 1181 |
| CACAGTAAGGCGTACA-1_CRC1  | Epithelial cells type2 | 1398 |
| ACGGGCTGTTAGATGA-1_CRC1  | Epithelial cells type2 | 1260 |
| CGATCGGAGATCGATA-1_CRC1  | Epithelial cells type2 | 1391 |
| GGGACCTTCTGGTGTA-1_CRC1  | Epithelial cells type2 | 1433 |
| CTAAGACTCAGCTGGC-1_CRC1  | Epithelial cells type2 | 1562 |
| TGGACGCTCTGGTTCC-1_CRC1  | Epithelial cells type2 | 1231 |
| TTGAACGCACATGTGT-1_CRC1  | Epithelial cells type2 | 1042 |
| CTCTGGTTCCTGCTTG-1_CRC1  | Epithelial cells type2 | 973  |
| CTGCGGAAGACGCAAC-1_CRC1  | Epithelial cells type2 | 860  |
| GTCATTTCAGTAGAGC-1_CRC1  | Epithelial cells type2 | 1127 |
| GTCACAATCAAGCCTA-1_CRC1  | Epithelial cells type2 | 1192 |
| AAACCTGAGTCACGCC-1_CRC1  | Epithelial cells type2 | 1576 |
| TACACGACACCCATGG-1_CRC1  | Epithelial cells type2 | 1597 |
| GCGCCAACATTT CAGG-1_CRC1 | Epithelial cells type2 | 1252 |
| TAAGAGATCAGTTGAC-1_CRC1  | Epithelial cells type2 | 1118 |
| CGTGTCTCAAGTTAAG-1_CRC1  | Epithelial cells type2 | 982  |
| CTAACTTAGTTACCCA-1_CRC1  | Epithelial cells type2 | 851  |
| ATTGGTGTGCGGTGTTA-1_CRC1 | Epithelial cells type2 | 1435 |
| TGTCCCATCCAGTATG-1_CRC1  | Epithelial cells type2 | 972  |
| CCACGGACAATGACCT-1_CRC1  | Epithelial cells type2 | 754  |
| TGACGGCGTTATGTGC-1_CRC1  | Epithelial cells type2 | 1218 |
| TGCGGGTAGTGTGAAT-1_CRC1  | Epithelial cells type2 | 747  |
| TTCGAAGCACCGCTAG-1_CRC1  | Epithelial cells type2 | 731  |
| TTGCGTCGTCTCGTTC-1_CRC1  | Epithelial cells type2 | 1132 |
| CATTATCCAGTCGATT-1_CRC1  | Epithelial cells type2 | 1101 |
| GCTCTGTTCTCGTTTA-1_CRC1  | Epithelial cells type2 | 1265 |
| CGGAGCTCAACACGCC-1_CRC1  | Epithelial cells type2 | 1162 |
| CAGCCGAGTTCGGCAC-1_CRC1  | Epithelial cells type2 | 1251 |
| GACGTTACATCTCCCA-1_CRC1  | Epithelial cells type2 | 911  |
| CAGATCAAGATCGATA-1_CRC1  | Epithelial cells type2 | 1066 |
| CAGCTGGAGACAAAGG-1_CRC1  | Epithelial cells type2 | 1269 |
| AAGGCAGAGACTAGGC-1_CRC1  | Epithelial cells type2 | 1253 |
| CGCTGGATCTATGTGG-1_CRC1  | Epithelial cells type2 | 909  |

|                         |                        |      |
|-------------------------|------------------------|------|
| ACGCCGAAGGAACTGC-1_CRC1 | Epithelial cells type2 | 964  |
| AGAGTGGTCTGCCAGG-1_CRC1 | Epithelial cells type2 | 892  |
| TCAGCTCGTACACCGC-1_CRC1 | Epithelial cells type2 | 984  |
| TCAGCAATCAGGATCT-1_CRC1 | Epithelial cells type2 | 2415 |
| CTCGGGATCGGCGCAT-1_CRC1 | Epithelial cells type2 | 2075 |
| TGACTAGCAGGACGTA-1_CRC1 | Epithelial cells type2 | 2166 |
| ACAGCTATCAACCAAC-1_CRC1 | Epithelial cells type2 | 1768 |
| GGGTGCCACATCTTT-1_CRC1  | Epithelial cells type2 | 2298 |
| TCGTAGAAGTTAACGA-1_CRC1 | Epithelial cells type2 | 1460 |
| TGAGGGATCTCTTATG-1_CRC1 | Epithelial cells type2 | 1320 |
| AGAGCGAAGAGTCTGG-1_CRC1 | Epithelial cells type2 | 1466 |
| AGGGTGAGTCTAAAGA-1_CRC1 | Epithelial cells type2 | 1747 |
| TGGACGCAGAGGTAGA-1_CRC1 | Epithelial cells type2 | 1806 |
| AGTGAGGTCTGGCGTG-1_CRC1 | Epithelial cells type2 | 1894 |
| CAGTCCTCATACGCTA-1_CRC1 | Epithelial cells type2 | 1394 |
| CGACCTTTCGCCAAAT-1_CRC1 | Epithelial cells type2 | 1684 |
| CCGTGGATCGTGACAT-1_CRC1 | Epithelial cells type2 | 1169 |
| GACTAACTCAACACGT-1_CRC1 | Epithelial cells type2 | 1517 |
| CACATTTCAAGTACCT-1_CRC1 | Epithelial cells type2 | 899  |
| TTGACTTTCCGAAGAG-1_CRC1 | Epithelial cells type2 | 1063 |
| AAGGCAGAGGCATGTG-1_CRC1 | Epithelial cells type2 | 924  |
| CTAATGGGTCATGCAT-1_CRC1 | Epithelial cells type2 | 1015 |
| AGTGAGGTCACGCATA-1_CRC0 | Epithelial cells type2 | 1035 |
| CGCGTTTCAAGCCGCT-1_CRC1 | Epithelial cells type2 | 1179 |
| CGTAGGCGTGCCTGGT-1_CRC1 | Epithelial cells type2 | 1131 |
| CCGTTCAGTATGAAAC-1_CRC1 | Epithelial cells type2 | 774  |
| GCGACCAAGTTGAGTA-1_CRC1 | Epithelial cells type2 | 1049 |
| CGTGTAATCAAGAAGT-1_CRC1 | Epithelial cells type2 | 1014 |
| TTGGAACAGAGCCCAA-1_CRC2 | Epithelial cells type2 | 1126 |
| TCTTCGGGTGTTTGTG-1_CRC1 | Epithelial cells type2 | 1481 |
| GTGCATATCTGCTGCT-1_CRC1 | Epithelial cells type2 | 1198 |
| AAGGCAGCAGCGATCC-1_CRC1 | Epithelial cells type2 | 1025 |
| CATCGAACAGCGTTCG-1_CRC1 | Epithelial cells type2 | 1308 |
| TACTTACAGATGTGGC-1_CRC1 | Epithelial cells type2 | 617  |
| GTACTCCCAAAGCGGT-1_CRC1 | Epithelial cells type2 | 862  |
| ATTTCTGCATAGAAAC-1_CRC1 | Epithelial cells type2 | 954  |
| CAGCAGCTCGGTCCGA-1_CRC1 | Epithelial cells type2 | 717  |
| CTGCCTACATCGGACC-1_CRC1 | Epithelial cells type2 | 1045 |
| ATCCACCTCAGTTTGG-1_CRC1 | Epithelial cells type2 | 977  |
| ACCCACTTCTCGAGTA-1_CRC1 | Epithelial cells type2 | 749  |
| AGTGTCAGTTTGTTC-1_CRC1  | Epithelial cells type2 | 947  |
| CCTTCCCCAGCCTATA-1_CRC1 | Epithelial cells type2 | 888  |
| GAATGAATCTACTTAC-1_CRC1 | Epithelial cells type2 | 776  |
| CGCCAAGAGATGCCTT-1_CRC1 | Epithelial cells type2 | 1151 |
| CCACGGAGTTGAGGTG-1_CRC1 | Epithelial cells type2 | 1196 |
| AGCTTGAGTAGTAGTA-1_CRC1 | Epithelial cells type2 | 646  |
| GGGTGTCAGGACCACA-1_CRC1 | Epithelial cells type2 | 1028 |
| TTAGTTCCAATGGATA-1_CRC1 | Epithelial cells type2 | 872  |
| CTGCCTAAGGCTCAGA-1_CRC1 | Epithelial cells type2 | 935  |
| CTTTGCGAGGTGCTTT-1_CRC1 | Epithelial cells type2 | 740  |
| CAGCTGGCACCGGAAA-1_CRC1 | Epithelial cells type2 | 1491 |

|                          |                        |      |
|--------------------------|------------------------|------|
| CCGGTAGCATGGTAGG-1_CRC1  | Epithelial cells type2 | 655  |
| TTCGAAGCATTAGCCA-1_CRC1  | Epithelial cells type2 | 951  |
| GCATACAAGGACACCA-1_CRC1  | Epithelial cells type2 | 816  |
| GTGGGTCGTA CTCTT-1_CRC1  | Epithelial cells type2 | 743  |
| AGGCCACTCACTCTTA-1_CRC1  | Epithelial cells type2 | 902  |
| CAGAGAGGTTGTGGAG-1_CRC1  | Epithelial cells type2 | 939  |
| CTAATGGTCACCGGGT-1_CRC1  | Epithelial cells type2 | 784  |
| TGCGGGTCAATAGAGT-1_CRC1  | Epithelial cells type2 | 943  |
| CGTCCATTTCGATCCCT-1_CRC1 | Epithelial cells type2 | 1037 |
| AACTCCCAGGTCATCT-1_CRC1  | Epithelial cells type2 | 1030 |
| TCTATTGCACACTGCG-1_CRC1  | Epithelial cells type2 | 964  |
| CACACAAGTCCGTAA-1_CRC1   | Epithelial cells type2 | 1078 |
| CTACATTAGA ACTCGG-1_CRC1 | Epithelial cells type2 | 909  |
| ATCATCTGTGGTGTAG-1_CRC1  | Epithelial cells type2 | 1027 |
| CTAAGACGTGACTACT-1_CRC1  | Epithelial cells type2 | 897  |
| TCAACGAGTAGAGGAA-1_CRC1  | Epithelial cells type2 | 1407 |
| CGCTATCTCCACGTTC-1_CRC1  | Epithelial cells type2 | 1105 |
| TACGGTAGTCTGGAGA-1_CRC1  | Epithelial cells type2 | 1065 |
| AGATCTGTCAAACCGT-1_CRC1  | Epithelial cells type2 | 1056 |
| GGGATGAGTCGCATCG-1_CRC1  | Epithelial cells type2 | 863  |
| AATCCAGTCAACCATG-1_CRC2  | Epithelial cells type2 | 2162 |
| CGTAGCGCAGATCCAT-1_CRC1  | Epithelial cells type2 | 1592 |
| GACAGAGTCCTCAATT-1_CRC1  | Epithelial cells type2 | 1710 |
| CGCCAAGTCGGCATCG-1_CRC1  | Epithelial cells type2 | 1949 |
| TGAGCATTCTGCCCTA-1_CRC1  | Epithelial cells type2 | 1911 |
| CAGTAACCACAACGCC-1_CRC1  | Epithelial cells type2 | 1562 |
| TACTTGTCACAGGTTT-1_CRC1  | Epithelial cells type2 | 2557 |
| CGCCAAGCAGTAACGG-1_CRC1  | Epithelial cells type2 | 2742 |
| TTTGGTTAGACTGGGT-1_CRC2  | Epithelial cells type2 | 960  |
| CTACCCATCTGTCTAT-1_CRC2  | Epithelial cells type2 | 1043 |
| CATTATCCATACTCTT-1_CRC2  | Epithelial cells type2 | 540  |
| CCTACCACATCGATGT-1_CRC2  | Epithelial cells type2 | 734  |
| ACAGCCGGTGATAAAC-1_CRC0  | Epithelial cells type2 | 1837 |
| GAGTCCGGTCTGATTG-1_CRC0  | Epithelial cells type2 | 873  |
| ATCATCTTCTTCATGT-1_CRC2  | Epithelial cells type2 | 1204 |
| AGCTTGATCTATCCCG-1_CRC2  | Epithelial cells type2 | 1080 |
| TTCGGTCAGAAGCCCA-1_CRC2  | Epithelial cells type2 | 649  |
| CGTGTCTTCCATGAGT-1_CRC2  | Epithelial cells type2 | 1582 |
| AAAGTAGTCGTGACAT-1_CRC1  | Epithelial cells type2 | 1761 |
| CGAATGTCATCGACGC-1_CRC1  | Epithelial cells type2 | 1412 |
| CCGTGGACATTCCCTCG-1_CRC2 | Epithelial cells type2 | 921  |
| GCAATCACATCGTCGG-1_CRC1  | Epithelial cells type2 | 1649 |
| GGTGCGTGTCCAGTTA-1_CRC1  | Epithelial cells type2 | 1187 |
| CCATGTCCAAGGACAC-1_CRC2  | Epithelial cells type2 | 1450 |
| TCTATTGAGCTAAGAT-1_CRC2  | Epithelial cells type2 | 1643 |
| CTCGGAGCACACAGAG-1_CRC3  | Epithelial cells type2 | 1900 |
| GCAGCCAAGGTAAACT-1_CRC2  | Epithelial cells type2 | 1510 |
| TAAGTGCGTATGGTTC-1_CRC3  | Epithelial cells type2 | 1682 |
| CGTGAGCAGAATTCCC-1_CRC3  | Epithelial cells type2 | 924  |
| TTTACTGGTTCACCTC-1_CRC3  | Epithelial cells type2 | 1074 |
| GGATTACCAGACAAGC-1_CRC2  | Epithelial cells type2 | 945  |

|                          |                        |      |
|--------------------------|------------------------|------|
| CTGCTGTGTCTAAACC-1_CRC2  | Epithelial cells type2 | 709  |
| GCGACCAAGGACAGAA-1_CRC2  | Epithelial cells type2 | 896  |
| AAACCTGTCAAGGCTT-1_CRC2  | Epithelial cells type2 | 794  |
| TTTATGCGTAGTGAAT-1_CRC2  | Epithelial cells type2 | 910  |
| CTACGTCCACCCATTC-1_CRC2  | Epithelial cells type2 | 690  |
| GGGCACTAGAAGCCCA-1_CRC2  | Epithelial cells type2 | 587  |
| TGTGTTTTCCAAGCCG-1_CRC2  | Epithelial cells type2 | 762  |
| ATCATGGGTTTGCATG-1_CRC2  | Epithelial cells type2 | 756  |
| TAAGTGCAGGGCATGT-1_CRC2  | Epithelial cells type2 | 801  |
| CGTCACTTCTAACTGG-1_CRC1  | Epithelial cells type2 | 422  |
| GATGCTACACGTGAGA-1_CRC2  | Epithelial cells type2 | 599  |
| TGCGCAGAGCCATCGC-1_CRC2  | Epithelial cells type2 | 568  |
| GTCACAAGTACTCAAC-1_CRC2  | Epithelial cells type2 | 510  |
| GACAGAGGTGTGAATA-1_CRC2  | Epithelial cells type2 | 482  |
| TGGACGCGTACTTGAC-1_CRC2  | Epithelial cells type2 | 364  |
| AACTCAGGTGGTAACG-1_CRC2  | Epithelial cells type2 | 864  |
| GCTCTGTAGAGCTATA-1_CRC2  | Epithelial cells type2 | 826  |
| ACGGCCAAGATGCCAG-1_CRC1  | Epithelial cells type2 | 837  |
| AGCTCCTGTCATATGC-1_CRC2  | Epithelial cells type2 | 670  |
| CGAGCCAAGGCGATAC-1_CRC0  | Epithelial cells type2 | 547  |
| ACGAGCCAGGAGTAGA-1_CRC2  | Epithelial cells type2 | 638  |
| ACTTTCACATAAAGGT-1_CRC2  | Epithelial cells type2 | 477  |
| CACTCCACACGTCAGC-1_CRC2  | Epithelial cells type2 | 728  |
| CTTCTCTAGCTGCCCA-1_CRC2  | Epithelial cells type2 | 599  |
| AAGGCAGTCCTTGGTC-1_CRC2  | Epithelial cells type2 | 604  |
| TATTACCAGGGTCTCC-1_CRC2  | Epithelial cells type2 | 538  |
| ATCATGGCACTGTGTA-1_CRC2  | Epithelial cells type2 | 637  |
| CTACCCAGTTGGTTTG-1_CRC2  | Epithelial cells type2 | 383  |
| GTCACAAAGCTAGCCC-1_CRC2  | Epithelial cells type2 | 841  |
| ATTGGTGCATCCCACT-1_CRC2  | Epithelial cells type2 | 638  |
| TCATTTGTCTGACCTC-1_CRC2  | Epithelial cells type2 | 473  |
| ACTGAACAGCGATTCT-1_CRC2  | Epithelial cells type2 | 438  |
| CTCAGAAGTGTGACCC-1_CRC2  | Epithelial cells type2 | 558  |
| AGCAGCCGTTGTGCGG-1_CRC2  | Epithelial cells type2 | 568  |
| CACCTTGTGCGCTGTT-1_CRC2  | Epithelial cells type2 | 535  |
| CGTAGCGTCTTGACGA-1_CRC2  | Epithelial cells type2 | 498  |
| GCAAACCTCAATGACCT-1_CRC2 | Epithelial cells type2 | 412  |
| TGGACGCAGTACGCCC-1_CRC2  | Epithelial cells type2 | 588  |
| CGATGTACACCCTATC-1_CRC2  | Epithelial cells type2 | 452  |
| GGCGACTAGGCTCATT-1_CRC2  | Epithelial cells type2 | 455  |
| GCGCCAACAAGCTGAG-1_CRC2  | Epithelial cells type2 | 782  |
| ATCTGCCCACATTAGC-1_CRC2  | Epithelial cells type2 | 701  |
| GGCAATTAGCAGGTCA-1_CRC2  | Epithelial cells type2 | 600  |
| TAAGCGTCAACACCCG-1_CRC2  | Epithelial cells type2 | 1542 |
| TCAGCTCCACACCGCA-1_CRC2  | Epithelial cells type2 | 277  |
| GGGAATGAGCAATCTC-1_CRC2  | Epithelial cells type2 | 214  |
| TGACTAGTCATCACCC-1_CRC2  | Epithelial cells type2 | 181  |
| AGCCTAACATCCGTGG-1_CRC2  | Epithelial cells type2 | 650  |
| TGCCAAATCGCGATCG-1_CRC2  | Epithelial cells type2 | 422  |
| CTGCTGTCAACACCCG-1_CRC2  | Epithelial cells type2 | 296  |
| TTTGCGCTCATTCACT-1_CRC2  | Epithelial cells type2 | 233  |

|                          |                        |      |
|--------------------------|------------------------|------|
| CCGGGATGTAAAGTCA-1 CRC2  | Epithelial cells type2 | 419  |
| ATCCACCTCATGGTCA-1 CRC2  | Epithelial cells type2 | 271  |
| CCTAAAGAGGACATTA-1 CRC2  | Epithelial cells type2 | 256  |
| AACGTTGCAGTATAAG-1 CRC2  | Epithelial cells type2 | 665  |
| AACTCCCGTTCCACTC-1 CRC2  | Epithelial cells type2 | 511  |
| AACTCTTTCAGTCCCT-1 CRC2  | Epithelial cells type2 | 441  |
| CAACTAGCAAAGTGCG-1 CRC2  | Epithelial cells type2 | 627  |
| GACGCGTGTAATAGCA-1 CRC2  | Epithelial cells type2 | 580  |
| CCTAAAGCATGGTTGT-1 CRC2  | Epithelial cells type2 | 910  |
| TAAACCGCATTCTCAT-1 CRC2  | Epithelial cells type2 | 664  |
| TGAGCCGTCACCACCT-1 CRC2  | Epithelial cells type2 | 585  |
| AGTGGGAAGCGTTTAC-1 CRC2  | Epithelial cells type2 | 715  |
| TGTGGTATCCTGTACC-1 CRC2  | Epithelial cells type2 | 726  |
| TCTTCCGTCAGCTAT-1 CRC2   | Epithelial cells type2 | 703  |
| AACCGCGCAGATCCAT-1 CRC2  | Epithelial cells type2 | 719  |
| GGGAGATTCGAGCCCA-1 CRC2  | Epithelial cells type2 | 562  |
| CGCTGGAAGATGAGAG-1 CRC0  | Epithelial cells type2 | 908  |
| GCTGGGTGTCCGAGTC-1 CRC0  | Epithelial cells type2 | 615  |
| TTGACTTTCAGCAACT-1 CRC0  | Epithelial cells type2 | 729  |
| TTTACTGGTGGTCCGT-1 CRC0  | Epithelial cells type2 | 871  |
| CGCGTTTGTCCGAATT-1 CRC2  | Epithelial cells type2 | 1552 |
| GGGAATGGTATAGTAG-1 CRC1  | Epithelial cells type2 | 1173 |
| TAGCCGGCAAAGGTGC-1 CRC1  | Epithelial cells type2 | 563  |
| TTATGCTCATGTGAT-1 CRC1   | Epithelial cells type2 | 734  |
| AACACGTTCTGAATGCT-1 CRC2 | Epithelial cells type2 | 1683 |
| TTATGCTCATCTACGA-1 CRC2  | Epithelial cells type2 | 1393 |
| TGGTTAGTCCCAAGTA-1 CRC2  | Epithelial cells type2 | 1388 |
| CACTCCAGTACTTGAC-1 CRC2  | Epithelial cells type2 | 906  |
| CGTCAGGCACGGCGTT-1 CRC2  | Epithelial cells type2 | 1500 |
| CAAGAAATCAGTCTC-1 CRC2   | Epithelial cells type2 | 1510 |
| TACTCATCACGAAATA-1 CRC2  | Epithelial cells type2 | 1039 |
| CTGTGCTGTCTAACGT-1 CRC2  | Epithelial cells type2 | 1717 |
| CTAGAGTAGTACTTGC-1 CRC2  | Epithelial cells type2 | 1077 |
| AACTGAAGAAGATTC-1 CRC2   | Epithelial cells type2 | 1053 |
| ATTCTACAGTTAAGTG-1 CRC2  | Epithelial cells type2 | 1029 |
| CCCAATCTCCGCATAA-1 CRC2  | Epithelial cells type2 | 185  |
| TTTCCTCGTCGGCTCA-1 CRC2  | Epithelial cells type2 | 876  |
| TTAGGACCACCAGCAC-1 CRC2  | Epithelial cells type2 | 858  |
| GTGCATAAGATCCGAG-1 CRC2  | Epithelial cells type2 | 653  |
| CACCAGGAGGGCTCTC-1 CRC2  | Epithelial cells type2 | 452  |
| TGCCCATCATGTCTC-1 CRC2   | Epithelial cells type2 | 506  |
| CGTTCTGAGGCCATAG-1 CRC2  | Epithelial cells type2 | 1463 |
| AACGTTGAGGCTAGGT-1 CRC2  | Epithelial cells type2 | 1301 |
| AAGTCTGCAGCCTTTC-1 CRC2  | Epithelial cells type2 | 1459 |
| CATCAGACAGTTAACC-1 CRC2  | Epithelial cells type2 | 1343 |
| CATGCCTTCAACTCTT-1 CRC2  | Epithelial cells type2 | 1018 |
| CCACGGAAGTGCGATG-1 CRC2  | Epithelial cells type2 | 1106 |
| TGACTAGAGAGTACCG-1 CRC2  | Epithelial cells type2 | 1221 |
| TCAGATGAGGAGCGAG-1 CRC2  | Epithelial cells type2 | 1280 |
| CACATTTTCGGCGCAT-1 CRC2  | Epithelial cells type2 | 935  |
| CGCGTTTTCCCTTGCA-1 CRC2  | Epithelial cells type2 | 769  |



|                          |                        |      |
|--------------------------|------------------------|------|
| GAAATGAGTCAAAGAT-1_CRC2  | Epithelial cells type2 | 1043 |
| GACTACAGTCCGCTGA-1_CRC2  | Epithelial cells type2 | 811  |
| GCAATCACAGTGAGTG-1_CRC2  | Epithelial cells type2 | 1697 |
| CATATTCCAAGGACTG-1_CRC2  | Epithelial cells type2 | 871  |
| TCAGGATCATGGAATA-1_CRC2  | Epithelial cells type2 | 892  |
| TGTGGTACAAACCTAC-1_CRC1  | Epithelial cells type3 | 2240 |
| AAGCCGCTCGTTACAG-1_CRC1  | Epithelial cells type3 | 1505 |
| GACACGCCAGTACACT-1_CRC1  | Epithelial cells type3 | 1234 |
| GTCGTAAAGGACATTA-1_CRC1  | Epithelial cells type3 | 1153 |
| TATGCCCCGTGCAGGTA-1_CRC1 | Epithelial cells type3 | 1023 |
| CATCGGGCAGGACGTA-1_CRC1  | Epithelial cells type3 | 868  |
| CATATGGGTCTAGTCA-1_CRC1  | Epithelial cells type3 | 1090 |
| TACTTGTCAGAGTGTG-1_CRC1  | Epithelial cells type3 | 1002 |
| AAGGAGCCAGACGCCT-1_CRC1  | Epithelial cells type3 | 1364 |
| ACGAGCCCAGTAAGAT-1_CRC1  | Epithelial cells type3 | 1171 |
| CCTACACTCAATAAGG-1_CRC1  | Epithelial cells type3 | 816  |
| CCTACCAGTACCTACA-1_CRC1  | Epithelial cells type3 | 958  |
| AGCATACAGTATGACA-1_CRC1  | Epithelial cells type3 | 1084 |
| CGGAGCTCACGACGAA-1_CRC1  | Epithelial cells type3 | 1547 |
| CTCACACTCAGCAACT-1_CRC1  | Epithelial cells type3 | 1582 |
| GTCATTTTCGTTGACA-1_CRC1  | Epithelial cells type3 | 1270 |
| CAGCCGAGTACTTGAC-1_CRC1  | Epithelial cells type3 | 1008 |
| GAACATCCAAGCCTAT-1_CRC1  | Epithelial cells type3 | 1211 |
| TAGTGGTTCGTTTAGG-1_CRC1  | Epithelial cells type3 | 1347 |
| CCGGGATGTGACGCCT-1_CRC1  | Epithelial cells type3 | 1313 |
| CTCAGAAGTCGTTGTA-1_CRC1  | Epithelial cells type3 | 1121 |
| GCTGCAGAGGATGCGT-1_CRC1  | Epithelial cells type3 | 1291 |
| AGAGCGAAGTGGTCCC-1_CRC1  | Epithelial cells type3 | 1610 |
| GCATGTATCTTGCAAG-1_CRC1  | Epithelial cells type3 | 1262 |
| GCATGTAAGGCTCAGA-1_CRC1  | Epithelial cells type3 | 2038 |
| CACAGTACACGAGGTA-1_CRC1  | Epithelial cells type3 | 945  |
| ATTGGTGTCAATAAGG-1_CRC1  | Epithelial cells type3 | 907  |
| ACGGCCACAGTCAGAG-1_CRC1  | Epithelial cells type3 | 938  |
| CAGCAGCGTACACCGC-1_CRC1  | Epithelial cells type3 | 1107 |
| GGCGTGTAGTCTCAAC-1_CRC1  | Epithelial cells type3 | 1245 |
| GGGAGATGTTTGACAC-1_CRC1  | Epithelial cells type3 | 1602 |
| GAAATGAGTGACAAAT-1_CRC1  | Epithelial cells type3 | 1065 |
| TCGAGGCGTGAGTGAC-1_CRC1  | Epithelial cells type3 | 1187 |
| TTCGGTCCAGTAAGCG-1_CRC1  | Epithelial cells type3 | 1436 |
| TCACGAAAGGATGCGT-1_CRC2  | Epithelial cells type3 | 2188 |
| CATATGGTCCCCGGATG-1_CRC1 | Epithelial cells type3 | 1544 |
| CTGAAACCATCCTAGA-1_CRC2  | Epithelial cells type3 | 1502 |
| CTACCCAAGCTGCAAG-1_CRC1  | Epithelial cells type3 | 1065 |
| CGGTAAAGCTGTTCA-1_CRC2   | Epithelial cells type3 | 1216 |
| TTCCAGAGAAACGAG-1_CRC2   | Epithelial cells type3 | 851  |
| ACGCCAGTCCTAGGGC-1_CRC1  | Epithelial cells type3 | 2813 |
| GAACGGAAGTGTGGCA-1_CRC1  | Epithelial cells type3 | 1181 |
| GTACTTTTCGTAGATC-1_CRC1  | Epithelial cells type3 | 1059 |
| TAGACCACAGTAGAGC-1_CRC1  | Epithelial cells type3 | 1018 |
| TTAGGCAAGATGTTAG-1_CRC1  | Epithelial cells type3 | 1258 |
| CCTTACGGTGCGCTTG-1_CRC1  | Epithelial cells type3 | 858  |

|                          |                        |      |
|--------------------------|------------------------|------|
| TTCGAAGAGCTCCTTC-1_CRC1  | Epithelial cells type3 | 1117 |
| GACCTGGCACCCAGTG-1_CRC1  | Epithelial cells type3 | 1513 |
| AAGTCTGCACAAGTAA-1_CRC1  | Epithelial cells type3 | 909  |
| CTCTACGAGTGTTAGA-1_CRC1  | Epithelial cells type3 | 1104 |
| GTCGGGTAGGCAAAGA-1_CRC1  | Epithelial cells type3 | 1267 |
| CCCTCCTAGCTCCTTC-1_CRC1  | Epithelial cells type3 | 1605 |
| CAGAATCAGGGCTCTC-1_CRC1  | Epithelial cells type3 | 1208 |
| ACGCCGAGTACCATCA-1_CRC1  | Epithelial cells type3 | 950  |
| CTTGGCTTCAGTTAGC-1_CRC1  | Epithelial cells type3 | 1112 |
| ATTGGACTCCCGGATG-1_CRC1  | Epithelial cells type3 | 941  |
| CAACTAGTCTGGTATG-1_CRC1  | Epithelial cells type3 | 720  |
| TATCTCAGTAAGTGTA-1_CRC1  | Epithelial cells type3 | 1026 |
| TGTATTCAAGTGAAGAG-1_CRC1 | Epithelial cells type3 | 1729 |
| CAACTAGCACCCATTC-1_CRC1  | Epithelial cells type3 | 1477 |
| TTTACTGCAATGGAAT-1_CRC1  | Epithelial cells type3 | 1601 |
| TGACAACCAACACGCC-1_CRC1  | Epithelial cells type3 | 1736 |
| ATCCACCAGAGGGCTT-1_CRC1  | Epithelial cells type3 | 1145 |
| CATCAGAGTCTTGCGG-1_CRC1  | Epithelial cells type3 | 1550 |
| CCACGGAAGTGTCTCA-1_CRC1  | Epithelial cells type3 | 1265 |
| TAAACCGAGCGATCCC-1_CRC1  | Epithelial cells type3 | 1814 |
| CCTACCAGTGCCTGTG-1_CRC1  | Epithelial cells type3 | 1730 |
| GCACTCTCACTTAACG-1_CRC1  | Epithelial cells type3 | 1635 |
| CTTCTCTAGCTTTGGT-1_CRC1  | Epithelial cells type3 | 1826 |
| GCACATATCTCGTTTA-1_CRC1  | Epithelial cells type3 | 1018 |
| CGGACACGTTAGGGTG-1_CRC1  | Epithelial cells type3 | 1584 |
| CGGACGTTCTATCCCG-1_CRC1  | Epithelial cells type3 | 1183 |
| GCTTCCAGTCTCCATC-1_CRC1  | Epithelial cells type3 | 1272 |
| TGCGCAGCAGACAGGT-1_CRC1  | Epithelial cells type3 | 1560 |
| CGTTCTGGTCCGTGAC-1_CRC1  | Epithelial cells type3 | 1272 |
| TTATGCTCAAGCTGTT-1_CRC1  | Epithelial cells type3 | 1004 |
| CGGCTAGCAACACCCG-1_CRC1  | Epithelial cells type3 | 1117 |
| TTTGTCAAGATGCCAG-1_CRC1  | Epithelial cells type3 | 1142 |
| CTTAGGAGTAGAGCTG-1_CRC1  | Epithelial cells type3 | 1376 |
| TGTATTCTCCTGTACC-1_CRC1  | Epithelial cells type3 | 974  |
| AAACGGGAGAATCTCC-1_CRC1  | Epithelial cells type3 | 2053 |
| GATCTAGTCTATCCCG-1_CRC1  | Epithelial cells type3 | 1874 |
| GTCGGGTAGCTTTGGT-1_CRC1  | Epithelial cells type3 | 1905 |
| CACAGTACACCAGGTC-1_CRC1  | Epithelial cells type3 | 1465 |
| CGTGAGCTCCGCAGTG-1_CRC1  | Epithelial cells type3 | 1626 |
| GGACATTCAAGCGATG-1_CRC1  | Epithelial cells type3 | 1898 |
| TCGTAGAAGGGATCTG-1_CRC1  | Epithelial cells type3 | 2436 |
| GTATCTTTCAGTTGAC-1_CRC1  | Epithelial cells type3 | 1771 |
| CCGTACTAGCCCTAAT-1_CRC1  | Epithelial cells type3 | 1352 |
| TGGACGCCAATGTTGC-1_CRC1  | Epithelial cells type3 | 1166 |
| CGTCCATCAACGCACC-1_CRC1  | Epithelial cells type3 | 1369 |
| ATAAGAGTCCCGGATG-1_CRC1  | Epithelial cells type3 | 1207 |
| GTCGTAAGTAGCGCAA-1_CRC1  | Epithelial cells type3 | 1324 |
| CACCTTGGTAATCGTC-1_CRC1  | Epithelial cells type3 | 1160 |
| TCAGGTAGTAGCCTCG-1_CRC1  | Epithelial cells type3 | 1330 |
| TGATTTCAAGTCGCCGT-1_CRC1 | Epithelial cells type3 | 1336 |
| TAGACCACATGCCTAA-1_CRC0  | Epithelial cells type3 | 2160 |

|                          |                        |      |
|--------------------------|------------------------|------|
| CATGCCTTCTAACTTC-1_CRC0  | Epithelial cells type3 | 1839 |
| GAGTCCGAGCGATATA-1_CRC0  | Epithelial cells type3 | 1734 |
| GTCATTTAGTCCAGGA-1_CRC0  | Epithelial cells type3 | 2065 |
| TGCCAAAGTGAGGCTA-1_CRC0  | Epithelial cells type3 | 1330 |
| CATCAGAGTCGACTAT-1_CRC0  | Epithelial cells type3 | 2088 |
| GGAGCAAAGTGACTCT-1_CRC0  | Epithelial cells type3 | 2084 |
| TCAGCAAGTGTTTGTG-1_CRC0  | Epithelial cells type3 | 1725 |
| GAGCAGACAGCCAATT-1_CRC0  | Epithelial cells type3 | 2236 |
| GCATACATCATCTGCC-1_CRC0  | Epithelial cells type3 | 1530 |
| ACCAGTACAATAGCAA-1_CRC0  | Epithelial cells type3 | 2046 |
| CCGTTCAAGCCGGTAA-1_CRC0  | Epithelial cells type3 | 1573 |
| CTAGCCTCACAAAGTAA-1_CRC0 | Epithelial cells type3 | 1378 |
| CCTTCGAGTGGTGTAG-1_CRC0  | Epithelial cells type3 | 2074 |
| GATCGCGTCAGAAATG-1_CRC0  | Epithelial cells type3 | 1551 |
| AACGTTGTCAAGGTAA-1_CRC0  | Epithelial cells type3 | 1812 |
| CGGGTCAAGATGTTAG-1_CRC0  | Epithelial cells type3 | 2179 |
| TCTCATATCAAGGTAA-1_CRC0  | Epithelial cells type3 | 1746 |
| GGTGAAGAGAGCTTCT-1_CRC2  | Epithelial cells type3 | 2318 |
| AATCGGTGTGCGCATCG-1_CRC2 | Epithelial cells type3 | 1572 |
| CCATGTCTCGGCGCAT-1_CRC2  | Epithelial cells type3 | 2445 |
| GGATGTTGTAGCTTGT-1_CRC1  | Epithelial cells type3 | 1639 |
| AAAGCAAAGAGTGACC-1_CRC1  | Epithelial cells type3 | 1431 |
| GACACGCCAGTCACTA-1_CRC1  | Epithelial cells type3 | 1451 |
| CATGGCGCAGTATAAG-1_CRC1  | Epithelial cells type3 | 1564 |
| ATCGAGTTCCTTGGTC-1_CRC1  | Epithelial cells type3 | 1239 |
| AGCATAACAGCCTCGTG-1_CRC1 | Epithelial cells type3 | 1314 |
| CTCTAATCAGGCGATA-1_CRC1  | Epithelial cells type3 | 1350 |
| GTATCTTAGTGAACAT-1_CRC1  | Epithelial cells type3 | 1614 |
| AGGGTGAGTGAGGCTA-1_CRC1  | Epithelial cells type3 | 1885 |
| ATGTGTGTCTCTGTGCG-1_CRC1 | Epithelial cells type3 | 1655 |
| CGCCAAGCAGTAAGCG-1_CRC1  | Epithelial cells type3 | 1492 |
| GTTTCGGGGTCAGCTAT-1_CRC1 | Epithelial cells type3 | 1395 |
| AACTGGTAGACCTAGG-1_CRC1  | Epithelial cells type3 | 1377 |
| GGATGTTGTTCCAACA-1_CRC1  | Epithelial cells type3 | 1250 |
| AACTCCCCAGGAATCG-1_CRC1  | Epithelial cells type3 | 964  |
| CAGCCGACACAACGTT-1_CRC1  | Epithelial cells type3 | 1401 |
| TAGTTGGCAAAGGTGC-1_CRC1  | Epithelial cells type3 | 1208 |
| TGGCCAGAGAGTGACC-1_CRC1  | Epithelial cells type3 | 1103 |
| TACAGTGAGACGACGT-1_CRC1  | Epithelial cells type3 | 1886 |
| ATTTCTGTACAGTAC-1_CRC1   | Epithelial cells type3 | 1576 |
| CACCACTTCGTACCGG-1_CRC1  | Epithelial cells type3 | 1509 |
| TCTCATACAGCGATCC-1_CRC1  | Epithelial cells type3 | 1584 |
| TACTTGTGTCTAGGTT-1_CRC1  | Epithelial cells type3 | 1012 |
| TAGTGGTAGTGAATTG-1_CRC1  | Epithelial cells type3 | 1275 |
| GAACATCTCCACGTGG-1_CRC1  | Epithelial cells type3 | 656  |
| CACAGTACAATAAGCA-1_CRC1  | Epithelial cells type3 | 778  |
| ACTATCTAGAGCCTAG-1_CRC1  | Epithelial cells type3 | 542  |
| TCAGGATCATACAGCT-1_CRC1  | Epithelial cells type3 | 761  |
| AATCGGTGTAGCGTCC-1_CRC1  | Epithelial cells type3 | 734  |
| CGGTAAATCCAAATGC-1_CRC1  | Epithelial cells type3 | 924  |
| CTACATTTCAATTGCGA-1_CRC1 | Epithelial cells type3 | 654  |

|                           |                        |      |
|---------------------------|------------------------|------|
| AGTCTTTTCATTTCACTT-1_CRC2 | Epithelial cells type3 | 617  |
| AGAGTGGAGCTCCTTC-1_CRC1   | Epithelial cells type3 | 1502 |
| TACTTACTCGTATCAG-1_CRC1   | Epithelial cells type3 | 2161 |
| GCTGGGTTCCCAGGTG-1_CRC1   | Epithelial cells type3 | 1229 |
| CCTCTGACACTGAAGG-1_CRC1   | Epithelial cells type3 | 1505 |
| TCAACGAGTTAAGACA-1_CRC1   | Epithelial cells type3 | 1505 |
| CAGCTAACAAGCCGTC-1_CRC1   | Epithelial cells type3 | 1183 |
| CGCTGGACAATGGAGC-1_CRC1   | Epithelial cells type3 | 976  |
| GTAGTCACATTTCACT-1_CRC1   | Epithelial cells type3 | 1186 |
| CGTTAGATCGCTGATA-1_CRC1   | Epithelial cells type3 | 1226 |
| ACATACGAGCAATATG-1_CRC1   | Epithelial cells type3 | 878  |
| CTAAGACAGATAGGAG-1_CRC1   | Epithelial cells type3 | 1063 |
| TTGCCGTAGTACGTTT-1_CRC1   | Epithelial cells type3 | 1042 |
| ACTTTCACAGGAATGC-1_CRC1   | Epithelial cells type3 | 1375 |
| GTAGTCATCGTAGGTT-1_CRC1   | Epithelial cells type3 | 870  |
| CGGACTGTCTGCTTGC-1_CRC1   | Epithelial cells type3 | 2897 |
| TTCTACATCCAAGCCG-1_CRC1   | Epithelial cells type3 | 1415 |
| ATCATCTGTGACTCAT-1_CRC1   | Epithelial cells type3 | 1467 |
| ACGATGTAGATCCCGC-1_CRC1   | Epithelial cells type3 | 1801 |
| TTGACTTTTGAATGGG-1_CRC1   | Epithelial cells type3 | 1141 |
| CATCAAGAGGACGAAA-1_CRC1   | Epithelial cells type3 | 1652 |
| ATGTGTGCACATTCGA-1_CRC1   | Epithelial cells type3 | 1616 |
| ACTGAACCAGACGTAG-1_CRC1   | Epithelial cells type3 | 1221 |
| CAGAATCTCAGCACAT-1_CRC1   | Epithelial cells type3 | 1315 |
| CTGAAGTAGAGTTGGC-1_CRC1   | Epithelial cells type3 | 1715 |
| TGACAACGTCCAGTAT-1_CRC1   | Epithelial cells type3 | 1098 |
| AACTCTTCACGAAACG-1_CRC1   | Epithelial cells type3 | 1235 |
| TCACAAGTCTAACTGG-1_CRC1   | Epithelial cells type3 | 1982 |
| GACGGCTTCATAGCAC-1_CRC1   | Epithelial cells type3 | 1059 |
| GGACAAGAGAGACGAA-1_CRC1   | Epithelial cells type3 | 1882 |
| GTATTCTCACATGGGA-1_CRC1   | Epithelial cells type3 | 1669 |
| GACTGCGTCCATGCTC-1_CRC1   | Epithelial cells type3 | 1284 |
| GTAACGTCACAACGCC-1_CRC1   | Epithelial cells type3 | 1105 |
| AGGGTGAAGAAACCTA-1_CRC1   | Epithelial cells type3 | 1222 |
| CTAGAGTAGCTAGTCT-1_CRC1   | Epithelial cells type3 | 813  |
| GCATGTACACAAGACG-1_CRC1   | Epithelial cells type3 | 1286 |
| TGCACCTCAAGTCATC-1_CRC1   | Epithelial cells type3 | 987  |
| CGGACACGTGTTAAGA-1_CRC1   | Epithelial cells type3 | 1086 |
| GCTTCCAAGTGGTAAT-1_CRC1   | Epithelial cells type3 | 946  |
| ATGTGTGAGCCTCGTG-1_CRC1   | Epithelial cells type3 | 602  |
| CGATGTAGTACTCAAC-1_CRC1   | Epithelial cells type3 | 945  |
| CTCGTCAAGTCAAGCG-1_CRC1   | Epithelial cells type3 | 1084 |
| CAAGTTGCAGTATAAG-1_CRC1   | Epithelial cells type3 | 1363 |
| GTGTGCGCAGACAAGC-1_CRC1   | Epithelial cells type3 | 987  |
| CTCATTATCGCTTGTC-1_CRC1   | Epithelial cells type3 | 1916 |
| CAGTAACGTTACAGAA-1_CRC1   | Epithelial cells type3 | 1073 |
| CGACCTTTTCTGCGCA-1_CRC1   | Epithelial cells type3 | 1416 |
| CGATGTAGTCGCATCG-1_CRC1   | Epithelial cells type3 | 1391 |
| GCATGCGCATGCTAGT-1_CRC1   | Epithelial cells type3 | 1128 |
| GGCGTGTTCTGAAAGA-1_CRC1   | Epithelial cells type3 | 3171 |
| AACTCTTGTTTCGTCTC-1_CRC1  | Epithelial cells type3 | 1835 |

|                         |                        |      |
|-------------------------|------------------------|------|
| CCGGTAGTCTCCGGTT-1_CRC1 | Epithelial cells type3 | 1243 |
| CAGAATCAGCGTAATA-1_CRC1 | Epithelial cells type3 | 1424 |
| CTAATGGAGGGCTTCC-1_CRC1 | Epithelial cells type3 | 1659 |
| CACTCCAAGGATGCGT-1_CRC1 | Epithelial cells type3 | 1286 |
| CAGAGAGCATGCATGT-1_CRC1 | Epithelial cells type3 | 735  |
| TCGTAGAAGAGGTAGA-1_CRC1 | Epithelial cells type3 | 1220 |
| AAGGAGCTCTGCTTGC-1_CRC1 | Epithelial cells type3 | 1128 |
| ATAGACCAGTGGACGT-1_CRC1 | Epithelial cells type3 | 1132 |
| CGGCTAGGTCTGATTG-1_CRC1 | Epithelial cells type3 | 977  |
| CTCATTAGTAGCGCAA-1_CRC1 | Epithelial cells type3 | 805  |
| GGAATAAGTCGCTTCT-1_CRC1 | Epithelial cells type3 | 1181 |
| GATCTAGGTACATGTC-1_CRC1 | Epithelial cells type3 | 975  |
| CATATTCAGGCTATCT-1_CRC1 | Epithelial cells type3 | 1092 |
| ACGATGTTCTCGGACG-1_CRC1 | Epithelial cells type3 | 873  |
| GGGCACTTCCTAGGGC-1_CRC1 | Epithelial cells type3 | 1097 |
| TTGACTTGTATATGGA-1_CRC1 | Epithelial cells type3 | 1699 |
| ATTATCCAGGTGACCA-1_CRC1 | Epithelial cells type3 | 1508 |
| GTTACAGCATCCTAGA-1_CRC1 | Epithelial cells type3 | 1003 |
| CATGGCGCAAAGGTGC-1_CRC1 | Epithelial cells type3 | 760  |
| CTGAAACAGAAGGGTA-1_CRC1 | Epithelial cells type3 | 713  |
| CTCGAGGAGCCCAGCT-1_CRC1 | Epithelial cells type3 | 1196 |
| TGGCCAGCATCCGGGT-1_CRC1 | Epithelial cells type3 | 1280 |
| AAAGATGTCCCATTAT-1_CRC1 | Epithelial cells type3 | 1008 |
| GATGAAAGTCAAAGCG-1_CRC1 | Epithelial cells type3 | 1224 |
| GATGAAATCAGAGACG-1_CRC1 | Epithelial cells type3 | 1487 |
| TACACGACAGGGTTAG-1_CRC1 | Epithelial cells type3 | 1753 |
| GAACATCTCCTTGGTC-1_CRC1 | Epithelial cells type3 | 1067 |
| TCAGCAAGTATATCCG-1_CRC1 | Epithelial cells type3 | 1232 |
| AGCAGCCCACAGACAG-1_CRC1 | Epithelial cells type3 | 765  |
| CCTTCCCAGCTACCTA-1_CRC1 | Epithelial cells type3 | 1377 |
| CGGACACTCACCGTAA-1_CRC1 | Epithelial cells type3 | 1648 |
| ATAGACCCAGGAACGT-1_CRC1 | Epithelial cells type3 | 1754 |
| GACAGAGGTACGCTGC-1_CRC1 | Epithelial cells type3 | 2263 |
| AACTCCCCACGACGAA-1_CRC1 | Epithelial cells type3 | 2789 |
| TGGGAAGCACAAGACG-1_CRC1 | Epithelial cells type3 | 2461 |
| TGCGTGGCACTCGACG-1_CRC1 | Epithelial cells type3 | 2059 |
| TGTGGTACAGGTGGAT-1_CRC1 | Epithelial cells type3 | 1862 |
| AAAGATGGTAGCGCAA-1_CRC1 | Epithelial cells type3 | 1930 |
| CAGCCGAAGAGAGCTC-1_CRC1 | Epithelial cells type3 | 1007 |
| TGATTTACGACACAG-1_CRC1  | Epithelial cells type3 | 1211 |
| CCGTACTGTTCGTGAT-1_CRC1 | Epithelial cells type3 | 2862 |
| TTTATGCCACATGGGA-1_CRC1 | Epithelial cells type3 | 1226 |
| CCCTCCTCAATAGAGT-1_CRC1 | Epithelial cells type3 | 1400 |
| TGTATTCGTCTCAACA-1_CRC1 | Epithelial cells type3 | 1704 |
| CATCGAATCAGCCTAA-1_CRC1 | Epithelial cells type3 | 1376 |
| TGCCAAAAGTTTGCCT-1_CRC1 | Epithelial cells type3 | 1215 |
| ATTGGACGTGCCTGTG-1_CRC1 | Epithelial cells type3 | 1187 |
| GCTGGGTTCCGTACAA-1_CRC1 | Epithelial cells type3 | 1079 |
| AAGGTTCTCAAGGTAA-1_CRC1 | Epithelial cells type3 | 1663 |
| TGGCCAGTCACAGGCC-1_CRC1 | Epithelial cells type3 | 1067 |
| GCCTCTATCACCACCT-1_CRC1 | Epithelial cells type3 | 2141 |

|                          |                        |      |
|--------------------------|------------------------|------|
| TTGCGTCGTAAGTAGT-1_CRC1  | Epithelial cells type3 | 1346 |
| CTTAAGTAGGAGTACC-1_CRC1  | Epithelial cells type3 | 1527 |
| TTAGGACTCAACACTG-1_CRC1  | Epithelial cells type3 | 1138 |
| TCAGCTCAGTATGACA-1_CRC1  | Epithelial cells type3 | 2696 |
| TCAATCTCATTGAGCT-1_CRC1  | Epithelial cells type3 | 1510 |
| TGCTGCTAGTGGGCTA-1_CRC1  | Epithelial cells type3 | 1299 |
| GTGGGTCCACAGCGTC-1_CRC1  | Epithelial cells type3 | 1499 |
| TGCCCTAGTTACGGAG-1_CRC1  | Epithelial cells type3 | 1288 |
| CTCACACAGCTGTTCA-1_CRC1  | Epithelial cells type3 | 1469 |
| GCCTCTATCTGATACG-1_CRC1  | Epithelial cells type3 | 872  |
| TACACGATCCCTAACC-1_CRC1  | Epithelial cells type3 | 975  |
| ATTGGACTCAACGGCC-1_CRC1  | Epithelial cells type3 | 1986 |
| TACTCGCAGTGGTAAT-1_CRC1  | Epithelial cells type3 | 1349 |
| AACTCCCAGGACAGAA-1_CRC1  | Epithelial cells type3 | 1164 |
| GTCCTCAAGCCAGAAC-1_CRC1  | Epithelial cells type3 | 1239 |
| CACAACTCGCGTTTC-1_CRC1   | Epithelial cells type3 | 1181 |
| TGCGCAGAGTGCCAGA-1_CRC1  | Epithelial cells type3 | 1042 |
| GATCGATTCCGTAGGC-1_CRC1  | Epithelial cells type3 | 1000 |
| TTGCGTCAGAATTGTG-1_CRC1  | Epithelial cells type3 | 753  |
| CGTGTAAGTTGTCTTT-1_CRC1  | Epithelial cells type3 | 963  |
| CTTAGGATCTACTATC-1_CRC1  | Epithelial cells type3 | 992  |
| GCATGCGCACTGCCAG-1_CRC1  | Epithelial cells type3 | 1093 |
| TATGCCCCGTACCGTTA-1_CRC1 | Epithelial cells type3 | 1492 |
| TACGGTAGTGAGGCTA-1_CRC1  | Epithelial cells type3 | 953  |
| ACATACGTCGCGGATC-1_CRC1  | Epithelial cells type3 | 872  |
| CTCGAAAGTTGCGCAC-1_CRC1  | Epithelial cells type3 | 1115 |
| TGCGCAGTCAAAGACA-1_CRC1  | Epithelial cells type3 | 996  |
| CGTGAGCAGCAATCTC-1_CRC1  | Epithelial cells type3 | 758  |
| GTCACGGGTCTAACGT-1_CRC1  | Epithelial cells type3 | 1354 |
| CGAACATAGCCACGCT-1_CRC1  | Epithelial cells type3 | 1320 |
| TGTGGTATCTTGCAAT-1_CRC1  | Epithelial cells type3 | 1105 |
| ACATCAGAGCTGAAAT-1_CRC1  | Epithelial cells type3 | 1461 |
| ATTCTACAGTCGTTTG-1_CRC1  | Epithelial cells type3 | 1277 |
| AACGTTGGTGGTAACG-1_CRC1  | Epithelial cells type3 | 1196 |
| GCTCCTATCAGCTGGC-1_CRC1  | Epithelial cells type3 | 1219 |
| CTCAGAAAGAATCTCC-1_CRC1  | Epithelial cells type3 | 1208 |
| TTTATGCTCTGTCCGT-1_CRC1  | Epithelial cells type3 | 1251 |
| CGCTGGACAATCTGCA-1_CRC1  | Epithelial cells type3 | 913  |
| CGCGTTTGTATGGTTC-1_CRC1  | Epithelial cells type3 | 1632 |
| CGATTGACACGGTAAG-1_CRC1  | Epithelial cells type3 | 875  |
| TCGTAGATCAGTGTTG-1_CRC1  | Epithelial cells type3 | 1216 |
| ATCACGAGTTGTCTTT-1_CRC1  | Epithelial cells type3 | 1202 |
| CTGATAGGTCTCTCTG-1_CRC1  | Epithelial cells type3 | 917  |
| CGGAGCTCACCGCTAG-1_CRC1  | Epithelial cells type3 | 1623 |
| CACACCTTCACTTACT-1_CRC1  | Epithelial cells type3 | 1492 |
| CGAATGTGTCTCATCC-1_CRC1  | Epithelial cells type3 | 1505 |
| CTGCCTAGTCAGAATA-1_CRC1  | Epithelial cells type3 | 1231 |
| GCTGGGTTCCGTCATC-1_CRC1  | Epithelial cells type3 | 1259 |
| CGGGTCAGTTCAGGCC-1_CRC1  | Epithelial cells type3 | 1629 |
| GGAAAGCGTCTCTTAT-1_CRC1  | Epithelial cells type3 | 1643 |
| ATCACGATCTCGTTTA-1_CRC1  | Epithelial cells type3 | 1308 |

|                         |                        |      |
|-------------------------|------------------------|------|
| CTGTTTATCATGCATG-1_CRC1 | Epithelial cells type3 | 1353 |
| GTTACAGGTGACTACT-1_CRC1 | Epithelial cells type3 | 1360 |
| GTGGGTCGTAGCGTCC-1_CRC1 | Epithelial cells type3 | 1399 |
| ACATACGAGATAGCAT-1_CRC1 | Epithelial cells type3 | 885  |
| TATCTCAAGTGTACGG-1_CRC1 | Epithelial cells type3 | 796  |
| TTCTACAAGACGCAAC-1_CRC1 | Epithelial cells type3 | 1196 |
| AGGGAGTTCGTTACGA-1_CRC1 | Epithelial cells type3 | 1127 |
| ACATACGCATCTGGTA-1_CRC1 | Epithelial cells type3 | 929  |
| ATGAGGGGTACTTGAC-1_CRC1 | Epithelial cells type3 | 864  |
| AAGGAGCGTCGGCACT-1_CRC1 | Epithelial cells type3 | 1555 |
| ACGTCAAGTTTCGCTC-1_CRC1 | Epithelial cells type3 | 1020 |
| TTGCCGTAGTGTACGG-1_CRC1 | Epithelial cells type3 | 988  |
| GAGCAGATCCGTACAA-1_CRC1 | Epithelial cells type3 | 1228 |
| GCTGCTTCAGATGGGT-1_CRC1 | Epithelial cells type3 | 1277 |
| CCTCAGTGTACTCTCC-1_CRC1 | Epithelial cells type3 | 855  |
| CGCCAAGCAATCCAAC-1_CRC1 | Epithelial cells type3 | 1013 |
| CGTCACTCACCAGATT-1_CRC1 | Epithelial cells type3 | 1923 |
| TCTATTGGTTATTCTC-1_CRC1 | Epithelial cells type3 | 2098 |
| TTCTTAGAGGACCACA-1_CRC1 | Epithelial cells type3 | 1979 |
| CACAAACGTTGTTTGG-1_CRC1 | Epithelial cells type3 | 1305 |
| GAGTCCGGTGGCTCCA-1_CRC1 | Epithelial cells type3 | 1176 |
| GCGACCACAGGACGTA-1_CRC1 | Epithelial cells type3 | 950  |
| ACACCGGGTATAGGTA-1_CRC1 | Epithelial cells type3 | 895  |
| CTGAAACCAGCTGGCT-1_CRC1 | Epithelial cells type3 | 729  |
| CATTATCCAAACAACA-1_CRC1 | Epithelial cells type3 | 1561 |
| GCGACCAAGGAGTTGC-1_CRC1 | Epithelial cells type3 | 1207 |
| GGTATTGAGCTCCTTC-1_CRC1 | Epithelial cells type3 | 1290 |
| GATGCTAAGGCTAGAC-1_CRC1 | Epithelial cells type3 | 1292 |
| CTGATCCGTAAGTAGT-1_CRC1 | Epithelial cells type3 | 1114 |
| GTCACAAAGAAGGCCT-1_CRC1 | Epithelial cells type3 | 651  |
| CAGAGAGTCGCATGGC-1_CRC1 | Epithelial cells type3 | 997  |
| CTGATAGTCCCTGACT-1_CRC1 | Epithelial cells type3 | 871  |
| GTCACGGGTAACGTTC-1_CRC1 | Epithelial cells type3 | 1259 |
| CTGCTGTCACTAGTAC-1_CRC1 | Epithelial cells type3 | 782  |
| CTGCCTACATCGGAAG-1_CRC1 | Epithelial cells type3 | 834  |
| TTGGCAAGTCGGCACT-1_CRC1 | Epithelial cells type3 | 1061 |
| AACCATGCATAAGACA-1_CRC1 | Epithelial cells type3 | 1354 |
| GGAATAAGTGACAAAT-1_CRC1 | Epithelial cells type3 | 1113 |
| CAGCCGAAGTGTTTGC-1_CRC1 | Epithelial cells type3 | 860  |
| GCACTCTCATGCCACG-1_CRC1 | Epithelial cells type3 | 736  |
| AGTTGGTTCAACGGGA-1_CRC1 | Epithelial cells type3 | 1126 |
| GGCTGGTGTATAGTAG-1_CRC1 | Epithelial cells type3 | 1043 |
| CAACCTCCAATCTGCA-1_CRC1 | Epithelial cells type3 | 1115 |
| TGCCCATTGAGGTAG-1_CRC1  | Epithelial cells type3 | 1100 |
| ACGCCGACAAGCCGCT-1_CRC1 | Epithelial cells type3 | 1270 |
| GTCGGGTAGTAGGCCA-1_CRC1 | Epithelial cells type3 | 1236 |
| CATGCCTGTCTTGCGG-1_CRC1 | Epithelial cells type3 | 1356 |
| AGATCTGTCAGTCAGT-1_CRC1 | Epithelial cells type3 | 1385 |
| CTGGTCTTCTTATCTG-1_CRC1 | Epithelial cells type3 | 1417 |
| CCCAATCAGATCCGAG-1_CRC1 | Epithelial cells type3 | 1115 |
| AGGGATGAGAGCTGGT-1_CRC1 | Epithelial cells type3 | 911  |

|                          |                        |      |
|--------------------------|------------------------|------|
| CGGACGTTTCAGCAACT-1_CRC1 | Epithelial cells type3 | 1124 |
| CGAGAAGGTGCGAAAC-1_CRC1  | Epithelial cells type3 | 741  |
| TTAACTCCAGCTGTGC-1_CRC1  | Epithelial cells type3 | 571  |
| GGTGCGTCAGATGAGC-1_CRC1  | Epithelial cells type3 | 808  |
| AAGGTTCCAACACGCC-1_CRC1  | Epithelial cells type3 | 1115 |
| GTAGGCCGTTGTGGCC-1_CRC1  | Epithelial cells type3 | 1002 |
| AAGACCTCATTGGGCC-1_CRC1  | Epithelial cells type3 | 714  |
| TATCTCAGTACCATCA-1_CRC1  | Epithelial cells type3 | 998  |
| GGAAAGCAGGTGATAT-1_CRC1  | Epithelial cells type3 | 994  |
| CATGGCGCAGACGCCT-1_CRC1  | Epithelial cells type3 | 728  |
| GGCGTGTTTCAGCTTAG-1_CRC1 | Epithelial cells type3 | 858  |
| ACTGATGTCCGTAGTA-1_CRC1  | Epithelial cells type3 | 1075 |
| AGGGATGCACCTCGGA-1_CRC1  | Epithelial cells type3 | 1002 |
| GACGTTAGTTTGCATG-1_CRC1  | Epithelial cells type3 | 1260 |
| TACTTGTAGTCCGTAT-1_CRC1  | Epithelial cells type3 | 1210 |
| CAGCGACGTCCGAGTC-1_CRC1  | Epithelial cells type3 | 1002 |
| CGTCAGGGTTCGAGTTT-1_CRC1 | Epithelial cells type3 | 852  |
| CGCTGGACAGGGTTAG-1_CRC1  | Epithelial cells type3 | 1436 |
| GTGCATAGTATTCGTG-1_CRC1  | Epithelial cells type3 | 1247 |
| CTACACCAGGGATGGG-1_CRC1  | Epithelial cells type3 | 1271 |
| TTCGAAGAGTCGAGTG-1_CRC1  | Epithelial cells type3 | 1311 |
| TAAGAGAAGCGCTTAT-1_CRC1  | Epithelial cells type3 | 1126 |
| TTTGGTTTCCTAGTGA-1_CRC1  | Epithelial cells type3 | 880  |
| AGCGGTTCGTCGTTGTA-1_CRC1 | Epithelial cells type3 | 1013 |
| TATCAGGGTGCAGTAG-1_CRC1  | Epithelial cells type3 | 832  |
| GCGACCAGTGGCTCCA-1_CRC1  | Epithelial cells type3 | 843  |
| GTGCATACAGGGTACA-1_CRC1  | Epithelial cells type3 | 916  |
| AGTGGGATCTGGCGAC-1_CRC1  | Epithelial cells type3 | 1443 |
| TGGCCAGGTGTATGGG-1_CRC1  | Epithelial cells type3 | 1190 |
| TGACTAGGTGCAACTT-1_CRC1  | Epithelial cells type3 | 1044 |
| GTACTTTGTGGCAAAC-1_CRC1  | Epithelial cells type3 | 979  |
| TCAGCAAAGAGCTGCA-1_CRC1  | Epithelial cells type3 | 832  |
| ATCCACCAGGCGCTCT-1_CRC1  | Epithelial cells type3 | 1367 |
| CTGATAGTCATTGCC-1_CRC1   | Epithelial cells type3 | 949  |
| GACGGCTCAATCACAC-1_CRC1  | Epithelial cells type3 | 1069 |
| GTATTCTAGATCTGAA-1_CRC1  | Epithelial cells type3 | 994  |
| CAGAGAGAGAAGGGTA-1_CRC1  | Epithelial cells type3 | 1232 |
| TTGGCAAGTCACTGGC-1_CRC1  | Epithelial cells type3 | 1073 |
| AGCTTGAGTAGCGTCC-1_CRC1  | Epithelial cells type3 | 1087 |
| CTACGTCAGCGACGTA-1_CRC1  | Epithelial cells type3 | 1111 |
| AACTGGTAGCTAACTC-1_CRC1  | Epithelial cells type3 | 1133 |
| CCGTACTCATGGATGG-1_CRC1  | Epithelial cells type3 | 916  |
| AACTCTTAGACACGAC-1_CRC1  | Epithelial cells type3 | 1328 |
| GTGCGGTGTTTGTGG-1_CRC1   | Epithelial cells type3 | 1505 |
| CAACCTCAGGGCATGT-1_CRC2  | Epithelial cells type4 | 4776 |
| CTCTAATCAGATGGCA-1_CRC2  | Epithelial cells type4 | 4012 |
| AGGCCACTCCGTAGTA-1_CRC2  | Epithelial cells type4 | 2008 |
| TCGCGTTTCAGTCCTTC-1_CRC2 | Epithelial cells type4 | 1989 |
| ACGTCAAGTCTAGGTT-1_CRC2  | Epithelial cells type4 | 1966 |
| GGGACCTGTATGAATG-1_CRC2  | Epithelial cells type4 | 2075 |
| TCGCGAGCAGCTGCAC-1_CRC2  | Epithelial cells type4 | 2129 |



|                         |                        |      |
|-------------------------|------------------------|------|
| TGGTTCCAGGCACATG-1_CRC2 | Epithelial cells type4 | 2229 |
| CGACTTCGTCTGATCA-1_CRC2 | Epithelial cells type4 | 2356 |
| CGTGAGCTCGGTCTAA-1_CRC2 | Epithelial cells type4 | 2539 |
| ACGGAGAAGTCGCCGT-1_CRC2 | Epithelial cells type4 | 1431 |
| GACGCGTCACGGACAA-1_CRC2 | Epithelial cells type4 | 1479 |
| TGACAACGTGTGTGCC-1_CRC2 | Epithelial cells type4 | 2196 |
| CAACTAGAGGCAAAGA-1_CRC2 | Epithelial cells type4 | 1732 |
| CGATTGACACCTGGTG-1_CRC2 | Epithelial cells type4 | 2611 |
| ACGCCAGAGGAACTGC-1_CRC2 | Epithelial cells type4 | 2162 |
| CCTCTGAAGACTTGAA-1_CRC2 | Epithelial cells type4 | 2077 |
| GGAAAGCGTAGTAGTA-1_CRC2 | Epithelial cells type4 | 1789 |
| TGCGTGGTCCCAGGTG-1_CRC2 | Epithelial cells type4 | 1781 |
| CCCAATCTCTCGAGTA-1_CRC2 | Epithelial cells type4 | 2290 |
| GTGTTAGGTAATAGCA-1_CRC2 | Epithelial cells type4 | 2273 |
| TGGTTCCTCAACGCC-1_CRC2  | Epithelial cells type4 | 2196 |
| CGATGTATCTCGCTTG-1_CRC2 | Epithelial cells type4 | 2350 |
| CTCCTAGGTAACGCGA-1_CRC2 | Epithelial cells type4 | 2225 |
| ATAGACCAGGTAGCTG-1_CRC2 | Epithelial cells type4 | 1604 |
| CAAGGCCTCGTAGATC-1_CRC2 | Epithelial cells type4 | 1921 |
| TTCTCAACATCAGTAC-1_CRC2 | Epithelial cells type4 | 1527 |
| AACTCTTAGGATGTAT-1_CRC2 | Epithelial cells type4 | 2197 |
| GAGCAGATCATCTGCC-1_CRC2 | Epithelial cells type4 | 2632 |
| GTCCTCATCTCTGAGA-1_CRC2 | Epithelial cells type4 | 3180 |
| TGTCCCACACTCAGGC-1_CRC2 | Epithelial cells type4 | 2845 |
| AACTGAGTATAGTAG-1_CRC2  | Epithelial cells type4 | 2347 |
| GCACATAGTCGAAAGC-1_CRC2 | Epithelial cells type4 | 2444 |
| GGACATTCAAACCTAC-1_CRC2 | Epithelial cells type4 | 1222 |
| TGACTTTGTATATGAG-1_CRC2 | Epithelial cells type4 | 1861 |
| CCGTGGAAGGTGTGGT-1_CRC2 | Epithelial cells type4 | 1275 |
| TGGGAAGAGTACACCT-1_CRC2 | Epithelial cells type4 | 1623 |
| TTGCGTCAGATCACGG-1_CRC2 | Epithelial cells type4 | 1050 |
| CATCCACGTCACCTAA-1_CRC2 | Epithelial cells type4 | 1765 |
| TCATTACAGCAGATCG-1_CRC2 | Epithelial cells type4 | 1296 |
| ACTGAGTGTTGTCTTT-1_CRC2 | Epithelial cells type4 | 2078 |
| ACGCCGACATGCCTAA-1_CRC2 | Epithelial cells type4 | 3441 |
| TCGGGACTCAAGGTAA-1_CRC2 | Epithelial cells type4 | 3296 |
| CACATAGAGTTTAGGA-1_CRC2 | Epithelial cells type4 | 2380 |
| AGTGAGGAGCCACGCT-1_CRC2 | Epithelial cells type4 | 2616 |
| AGCTTGAAGTCCATAC-1_CRC2 | Epithelial cells type4 | 1998 |
| CACCAGGTCGTGGACC-1_CRC2 | Epithelial cells type4 | 1628 |
| CCGTGGAAGCAATATG-1_CRC2 | Epithelial cells type4 | 1450 |
| ATAGACCCATGACGGA-1_CRC2 | Epithelial cells type4 | 1555 |
| CGTTAGAAGTTAGGTA-1_CRC2 | Epithelial cells type4 | 1880 |
| AGATTGCGTCTTCTCG-1_CRC2 | Epithelial cells type4 | 1891 |
| GACTGCGGTACTCAAC-1_CRC2 | Epithelial cells type4 | 1329 |
| ACGAGCCAGGGTCTCC-1_CRC2 | Epithelial cells type4 | 1269 |
| CTCGAGGGTTGATTCG-1_CRC2 | Epithelial cells type4 | 2101 |
| GGGCACTGTTAGATGA-1_CRC2 | Epithelial cells type4 | 1943 |
| CAAGTTGAGAGTAATC-1_CRC2 | Epithelial cells type4 | 1575 |
| CAGCCGACAGTATGCT-1_CRC2 | Epithelial cells type4 | 1209 |
| ACCGTAAAGAATTGTG-1_CRC2 | Epithelial cells type4 | 2362 |

|                         |                        |      |
|-------------------------|------------------------|------|
| CCATGTCGTAAGTAGT-1_CRC2 | Epithelial cells type4 | 1803 |
| CCTATTACAGTATCTG-1_CRC2 | Epithelial cells type4 | 2815 |
| AATCCAGCACGACTCG-1_CRC2 | Epithelial cells type4 | 2542 |
| GCACATAGTAGCGTAG-1_CRC2 | Epithelial cells type4 | 2755 |
| CAGCTAACAATCGAAA-1_CRC2 | Epithelial cells type4 | 2184 |
| AGGCCGTAGTCACGCC-1_CRC2 | Epithelial cells type4 | 2212 |
| GCCTCTAGTCGCTTTC-1_CRC2 | Epithelial cells type4 | 2231 |
| CATATGGAGGGCTCTC-1_CRC2 | Epithelial cells type4 | 2451 |
| GTCGGGTAGAATTGTG-1_CRC2 | Epithelial cells type4 | 2577 |
| CATCGGGGTCAATCT-1_CRC2  | Epithelial cells type4 | 2134 |
| CAGTAACCAGGTCCAC-1_CRC2 | Epithelial cells type4 | 2047 |
| GTGCAGCAGGCCCTCA-1_CRC2 | Epithelial cells type4 | 1703 |
| AGCTTGAGTGCCTGGT-1_CRC2 | Epithelial cells type4 | 1666 |
| TCATTTGCAGTATAAG-1_CRC2 | Epithelial cells type4 | 2414 |
| CATCGAAGTAGAAGGA-1_CRC2 | Epithelial cells type4 | 2423 |
| GCAGTTAGTTAGTGGG-1_CRC2 | Epithelial cells type4 | 2165 |
| ACGCCGAGTCTCCCTA-1_CRC2 | Epithelial cells type4 | 1790 |
| GCCTCTACATACTCTT-1_CRC2 | Epithelial cells type4 | 1945 |
| GGACAGAGTCGCGTGT-1_CRC2 | Epithelial cells type4 | 2297 |
| TTTGGTTCACATGTGT-1_CRC2 | Epithelial cells type4 | 2094 |
| ACATACGTCATCACCC-1_CRC2 | Epithelial cells type4 | 2068 |
| CAACCTCTCGCTAGCG-1_CRC2 | Epithelial cells type4 | 2134 |
| ACCTTTAGTTCCTCCA-1_CRC2 | Epithelial cells type4 | 2229 |
| GCTGCTTAGCTCAACT-1_CRC2 | Epithelial cells type4 | 2483 |
| TACACGACATGCCCGA-1_CRC2 | Epithelial cells type4 | 2002 |
| TTGGCAAACTACAGT-1_CRC2  | Epithelial cells type4 | 2109 |
| CGCCAAGTCTGATTCT-1_CRC2 | Epithelial cells type4 | 2596 |
| GCAAACGTTCGTTGA-1_CRC2  | Epithelial cells type4 | 2465 |
| CCGTTCAAGTTTAGGA-1_CRC2 | Epithelial cells type4 | 2271 |
| ACGCCAGGTAGATTAG-1_CRC2 | Epithelial cells type4 | 1916 |
| CTAGCCTTCGGCGGTT-1_CRC2 | Epithelial cells type4 | 1986 |
| CATGCCTCAGCTTAAC-1_CRC2 | Epithelial cells type4 | 2273 |
| CAGATCAGTTCACCTC-1_CRC2 | Epithelial cells type4 | 1689 |
| TACTTACTCCGAATGT-1_CRC2 | Epithelial cells type4 | 2115 |
| CTGTGCTAGCTGATAA-1_CRC2 | Epithelial cells type4 | 2250 |
| GGGATGACACTTAACG-1_CRC2 | Epithelial cells type4 | 2140 |
| AACTCCCGTTTGACTG-1_CRC2 | Epithelial cells type4 | 1936 |
| GTGTGCGGTTCTCCA-1_CRC2  | Epithelial cells type4 | 1844 |
| ACACCCTTCGCGTTT-1_CRC2  | Epithelial cells type4 | 2613 |
| ACATCAGAGCCAGGAT-1_CRC2 | Epithelial cells type4 | 2300 |
| CGATTGAAGCCGGTAA-1_CRC2 | Epithelial cells type4 | 1714 |
| GGCTGGTCATTGTGCA-1_CRC2 | Epithelial cells type4 | 1698 |
| GATGAAATCGCAGGCT-1_CRC2 | Epithelial cells type4 | 1497 |
| TTTGCGCAGTATGACA-1_CRC2 | Epithelial cells type4 | 2026 |
| AAAGCAAGTTTAGGAA-1_CRC2 | Epithelial cells type4 | 1790 |
| CGATGGCCAAGCCGCT-1_CRC2 | Epithelial cells type4 | 2001 |
| TTCGGTCCACATTCT-1_CRC2  | Epithelial cells type4 | 3656 |
| CGCTGGAGTAACGACG-1_CRC2 | Epithelial cells type4 | 3336 |
| CATATGGTCTGTCTCG-1_CRC2 | Epithelial cells type4 | 2897 |
| TGTATTCGTATGAAAC-1_CRC2 | Epithelial cells type4 | 3129 |
| ACGAGCCTCGCCATAA-1_CRC2 | Epithelial cells type4 | 3173 |

|                          |                        |      |
|--------------------------|------------------------|------|
| AACTCTTAGTACTTGC-1_CRC2  | Epithelial cells type4 | 2956 |
| AACCGCGCATTGGTAC-1_CRC2  | Epithelial cells type4 | 3008 |
| GCTCCTACAAGCTGAG-1_CRC2  | Epithelial cells type4 | 2888 |
| CGAATGTGTATAATGG-1_CRC2  | Epithelial cells type4 | 2106 |
| TATTACCCACGGTAAG-1_CRC2  | Epithelial cells type4 | 3304 |
| GTTTCTAGTCAGCTAT-1_CRC2  | Epithelial cells type4 | 3901 |
| CTGATCCAGCCTATGT-1_CRC2  | Epithelial cells type4 | 3522 |
| TAGACCATCGCAAGCC-1_CRC2  | Epithelial cells type4 | 3400 |
| TTCTACACATATACCG-1_CRC2  | Epithelial cells type4 | 3014 |
| GATGAAACATCACGAT-1_CRC2  | Epithelial cells type4 | 2961 |
| GGACAGAAGCAGACTG-1_CRC2  | Epithelial cells type4 | 3190 |
| CACCTTGTCTATCCTA-1_CRC2  | Epithelial cells type4 | 2301 |
| CATCGAAGTGTGACCC-1_CRC2  | Epithelial cells type4 | 3250 |
| GAGTCCGAGACAGAGA-1_CRC2  | Epithelial cells type4 | 2453 |
| TGCACCTGTAACGTTT-1_CRC2  | Epithelial cells type4 | 2637 |
| ATAACGCAGATATACG-1_CRC2  | Epithelial cells type4 | 2332 |
| CTCTAATCACGACTCG-1_CRC2  | Epithelial cells type4 | 2659 |
| GGATGTTAGAGCCTAG-1_CRC2  | Epithelial cells type4 | 3201 |
| CACATAGCATTTCACT-1_CRC2  | Epithelial cells type4 | 1969 |
| TTCGAAGAGCCACCTG-1_CRC2  | Epithelial cells type4 | 2504 |
| ATCATGGGTTTGTGG-1_CRC2   | Epithelial cells type4 | 2530 |
| CGTCTACGTCATTAGC-1_CRC2  | Epithelial cells type4 | 2092 |
| AACACGTGTGTAATGA-1_CRC2  | Epithelial cells type4 | 2704 |
| GCAGCCATCACCGTAA-1_CRC2  | Epithelial cells type4 | 2785 |
| TACTTACGTATCAGTC-1_CRC2  | Epithelial cells type4 | 3327 |
| CCACGGATCAGGCAAG-1_CRC2  | Epithelial cells type4 | 2656 |
| CACTCCAGTCTCCCTA-1_CRC2  | Epithelial cells type4 | 2571 |
| CCGTTTCATCACCTCGT-1_CRC2 | Epithelial cells type4 | 2841 |
| TGCACCTTCTTCTGGC-1_CRC2  | Epithelial cells type4 | 2794 |
| AGTGAGGTCTCGCATC-1_CRC2  | Epithelial cells type4 | 1841 |
| CCACGGACATTCTTAC-1_CRC2  | Epithelial cells type4 | 2629 |
| CGGGTCAAGACCGGAT-1_CRC2  | Epithelial cells type4 | 2862 |
| TCTGGAAGTCCCTACT-1_CRC2  | Epithelial cells type4 | 2329 |
| ATCATCTCACAGATTC-1_CRC2  | Epithelial cells type4 | 2251 |
| ACTGTCCAGTGAACAT-1_CRC2  | Epithelial cells type4 | 1625 |
| CGAGAAGCACGAAACG-1_CRC2  | Epithelial cells type4 | 2047 |
| GATGAGGTCAAAGTAG-1_CRC2  | Epithelial cells type4 | 2408 |
| CCGTACTGTGCGGAAA-1_CRC2  | Epithelial cells type4 | 2023 |
| CTTAGGATCAAACAAG-1_CRC2  | Epithelial cells type4 | 2153 |
| CTCGGAGTCCCTGACT-1_CRC2  | Epithelial cells type4 | 2092 |
| CTTACCGGTGTGTGCC-1_CRC2  | Epithelial cells type4 | 2320 |
| CTAGTGAAGATCCGAG-1_CRC2  | Epithelial cells type4 | 2162 |
| GGTGCGTGTGCGAAAC-1_CRC2  | Epithelial cells type4 | 2127 |
| CGAGCCACACGGTAGA-1_CRC2  | Epithelial cells type4 | 3130 |
| TGACTAGTCGGTGTGCG-1_CRC2 | Epithelial cells type4 | 2691 |
| GAACCTAAGATCTGCT-1_CRC2  | Epithelial cells type4 | 2588 |
| GGTGAAGTCTTGTGTTG-1_CRC2 | Epithelial cells type4 | 2689 |
| CAGTCCTCACGCATCG-1_CRC2  | Epithelial cells type4 | 2354 |
| TTAACTCTCGTAGGTT-1_CRC2  | Epithelial cells type4 | 2506 |
| TGGCTGGTCCTTAGC-1_CRC2   | Epithelial cells type4 | 3071 |
| CGTAGGCGTGCTAGCC-1_CRC2  | Epithelial cells type4 | 2379 |

|                          |                        |      |
|--------------------------|------------------------|------|
| CTGCGGACATTTGCCC-1_CRC2  | Epithelial cells type4 | 3102 |
| GCTGGGTTCTTCAACT-1_CRC2  | Epithelial cells type4 | 3039 |
| CACACAATCACAATGC-1_CRC2  | Epithelial cells type4 | 3041 |
| TACGGATAGGCAAAGA-1_CRC2  | Epithelial cells type4 | 2807 |
| CAAGGCCTCACAGGCC-1_CRC2  | Epithelial cells type4 | 2038 |
| GAGGTGACAGAGCCAA-1_CRC2  | Epithelial cells type4 | 1851 |
| GTACGTAAGAGTACCG-1_CRC2  | Epithelial cells type4 | 2498 |
| ACCAGTAGTTGGTAAA-1_CRC2  | Epithelial cells type4 | 2124 |
| AGCGTCGGTAGGGACT-1_CRC2  | Epithelial cells type4 | 1981 |
| TAGTGGTCATCACCCCT-1_CRC2 | Epithelial cells type4 | 1808 |
| AAAGATGGTGCAACGA-1_CRC2  | Epithelial cells type4 | 2182 |
| GCGCAGTAGTGA CTCT-1_CRC2 | Epithelial cells type4 | 2075 |
| CAGCCGACATGACGGA-1_CRC2  | Epithelial cells type4 | 1922 |
| CTCGGAGTCGTTACAG-1_CRC2  | Epithelial cells type4 | 2021 |
| AACACGTTTCGTACGGC-1_CRC2 | Epithelial cells type4 | 2124 |
| TGTGTTTCAAGCCATT-1_CRC2  | Epithelial cells type4 | 1871 |
| ACTTTCATCAATACCG-1_CRC2  | Epithelial cells type4 | 2213 |
| ATTGGACGTCCATGAT-1_CRC2  | Epithelial cells type4 | 2298 |
| TGCGTGGAGTCGCCGT-1_CRC2  | Epithelial cells type4 | 2627 |
| CTCAGAACAAGAGTCG-1_CRC2  | Epithelial cells type4 | 2947 |
| AACCATGAGGCGATAC-1_CRC2  | Epithelial cells type4 | 2654 |
| TCACGAAAGCGTTCCG-1_CRC2  | Epithelial cells type4 | 2504 |
| ACGCCGAGTCTTCGTC-1_CRC2  | Epithelial cells type4 | 2091 |
| TGGCCAGGTAAATGTG-1_CRC2  | Epithelial cells type4 | 2216 |
| AGTTGGTGTTCGTTGA-1_CRC2  | Epithelial cells type4 | 1915 |
| GACAGAGCAGCTGTAT-1_CRC2  | Epithelial cells type4 | 2051 |
| TCGAGGCAGATATGGT-1_CRC2  | Epithelial cells type4 | 2297 |
| GATCGTAAGTGTCCCG-1_CRC2  | Epithelial cells type4 | 1849 |
| AAGGAGCGTGTGGCTC-1_CRC2  | Epithelial cells type4 | 1872 |
| CTGAAACGTGTGCGTC-1_CRC2  | Epithelial cells type4 | 1444 |
| CTCGAAAGTTTGTGG-1_CRC2   | Epithelial cells type4 | 2182 |
| GACTGCGCAATGAAAC-1_CRC2  | Epithelial cells type4 | 1977 |
| GAATAAGCAAGAGTCG-1_CRC2  | Epithelial cells type4 | 1606 |
| GTTCGGGTCAGTTGAC-1_CRC2  | Epithelial cells type4 | 1606 |
| AATCCAGGTATGAAAC-1_CRC2  | Epithelial cells type4 | 1899 |
| CAGCGACCACGAGGTA-1_CRC2  | Epithelial cells type4 | 2136 |
| CAACCAAGTGTGCTG-1_CRC2   | Epithelial cells type4 | 2216 |
| TATCAGGAGCTAACTC-1_CRC2  | Epithelial cells type4 | 2064 |
| AGGCCGTTTCCTGTAGA-1_CRC2 | Epithelial cells type4 | 2015 |
| CTCAGAAAGGAACTGC-1_CRC2  | Epithelial cells type4 | 2318 |
| CCTTTCTAGAAACCTA-1_CRC2  | Epithelial cells type4 | 2320 |
| CGGTAAAGTCTTCTCG-1_CRC2  | Epithelial cells type4 | 2229 |
| GTTTCGGGGTATAGGTA-1_CRC2 | Epithelial cells type4 | 2119 |
| TACCTATGTTCTGTTT-1_CRC2  | Epithelial cells type4 | 2451 |
| AGCGTCGGTCTACCTC-1_CRC2  | Epithelial cells type4 | 2583 |
| TCGCGAGGTAGCGTAG-1_CRC2  | Epithelial cells type4 | 2601 |
| AGAGTGGAGATGCGAC-1_CRC2  | Epithelial cells type4 | 2484 |
| TCACAAGGTGGTGTAG-1_CRC2  | Epithelial cells type4 | 3057 |
| TTTACTGGTGTGGGA-1_CRC2   | Epithelial cells type4 | 2199 |
| CAAGAAAGTTGTGCGG-1_CRC2  | Epithelial cells type4 | 2500 |
| GTATTCTTCGGACAAG-1_CRC2  | Epithelial cells type4 | 2396 |

|                          |                        |      |
|--------------------------|------------------------|------|
| ACCTTTACAGTCACTA-1_CRC2  | Epithelial cells type4 | 2566 |
| GGCCGATTCCGAAGAG-1_CRC2  | Epithelial cells type4 | 2501 |
| GGTATTGTCAGTACGT-1_CRC2  | Epithelial cells type4 | 2808 |
| TGTGGTAAGTGTCTCA-1_CRC2  | Epithelial cells type4 | 2828 |
| AACCGCGGTCAAGCGA-1_CRC2  | Epithelial cells type4 | 1837 |
| TACGGTAAGCGTAGTG-1_CRC2  | Epithelial cells type4 | 2273 |
| TTGACTTGTAACACA-1_CRC2   | Epithelial cells type4 | 2573 |
| GTTAAGCCAGCGAACA-1_CRC2  | Epithelial cells type4 | 2410 |
| TGTCCCATCGGCATCG-1_CRC2  | Epithelial cells type4 | 2396 |
| AGAGCGACAAGTCTAC-1_CRC2  | Epithelial cells type4 | 2215 |
| CACAAACCATACAGCT-1_CRC2  | Epithelial cells type4 | 1997 |
| GGCTCGACATGGTTGT-1_CRC2  | Epithelial cells type4 | 2768 |
| TGACTTTTCCACGTTC-1_CRC2  | Epithelial cells type4 | 3220 |
| CGACTTCCAAGTTAAG-1_CRC2  | Epithelial cells type4 | 2363 |
| TACCTTACACAGGAGT-1_CRC2  | Epithelial cells type4 | 2832 |
| AACTCCCGTACCGTTA-1_CRC2  | Epithelial cells type4 | 2500 |
| GTGAAGGTCTTAGCCC-1_CRC2  | Epithelial cells type4 | 2585 |
| CAGAATCTCGAGAACG-1_CRC2  | Epithelial cells type4 | 2283 |
| CGGACACTCCTTGGTC-1_CRC2  | Epithelial cells type4 | 2135 |
| GCCAAATAGATCCCGC-1_CRC2  | Epithelial cells type4 | 2404 |
| GATGCTAAGGTGCTAG-1_CRC2  | Epithelial cells type4 | 2102 |
| ACATCAGCAGTCAGCC-1_CRC2  | Epithelial cells type4 | 2362 |
| GTGCATACATGGGACA-1_CRC2  | Epithelial cells type4 | 2015 |
| AACCATGAGGTGTAA-1_CRC2   | Epithelial cells type4 | 2177 |
| ACGCAGCAGCCTATGT-1_CRC2  | Epithelial cells type4 | 1803 |
| CCGTACTGTCTGCAAT-1_CRC2  | Epithelial cells type4 | 2427 |
| CAGCGACAGGACATTA-1_CRC2  | Epithelial cells type4 | 2507 |
| CTTAACTCAAACGTGG-1_CRC2  | Epithelial cells type4 | 2022 |
| TATCTCAGTAGAAGGA-1_CRC2  | Epithelial cells type4 | 1991 |
| GGACATTTTCATGCATG-1_CRC2 | Epithelial cells type4 | 2413 |
| TTCTACATCGTCCAGG-1_CRC2  | Epithelial cells type4 | 1496 |
| CGAATGTGTCCTAGCG-1_CRC2  | Epithelial cells type4 | 1953 |
| TTTCCTCAGAAACCGC-1_CRC2  | Epithelial cells type4 | 1965 |
| CTAAGACTCTAACTTC-1_CRC2  | Epithelial cells type4 | 2035 |
| CTTAACTGTCCGAGTC-1_CRC2  | Epithelial cells type4 | 2042 |
| GTTACAGAGTTGAGAT-1_CRC2  | Epithelial cells type4 | 2350 |
| TGGTTCCGTACGACCC-1_CRC2  | Epithelial cells type4 | 1902 |
| AGCATACGTCCCTACT-1_CRC2  | Epithelial cells type4 | 2184 |
| CGAATGTAGTTTAGGA-1_CRC2  | Epithelial cells type4 | 2051 |
| CTCTACGAGCGGCTTC-1_CRC2  | Epithelial cells type4 | 1776 |
| GGGACCTCAAGCTGTT-1_CRC2  | Epithelial cells type4 | 2055 |
| GGGCACTAGATCACGG-1_CRC2  | Epithelial cells type4 | 2178 |
| GTAACGTTCTCCAACC-1_CRC2  | Epithelial cells type4 | 2089 |
| GCGACCACACAGGAGT-1_CRC2  | Epithelial cells type4 | 1967 |
| GCTGCAGCAGGTCCAC-1_CRC2  | Epithelial cells type4 | 1852 |
| AAAGATGCATCACGTA-1_CRC2  | Epithelial cells type4 | 1834 |
| GCTGGGTTTCGTTTATC-1_CRC2 | Epithelial cells type4 | 2281 |
| GCGACCACACCTTGTC-1_CRC2  | Epithelial cells type4 | 1931 |
| CGCGTTTTTCCTTTACA-1_CRC2 | Epithelial cells type4 | 2048 |
| CTAACTTTCCAGAAGG-1_CRC2  | Epithelial cells type4 | 2126 |
| TGAGCCGCAGACAGGT-1_CRC2  | Epithelial cells type4 | 1567 |

|                          |                        |      |
|--------------------------|------------------------|------|
| ATCCACCCACGGACAA-1_CRC2  | Epithelial cells type4 | 1626 |
| AGTAGTCTCTGAGTGT-1_CRC2  | Epithelial cells type4 | 2303 |
| CCGTACTGTGGTTTCA-1_CRC2  | Epithelial cells type4 | 2263 |
| CTTGGCTAGGAGTACC-1_CRC2  | Epithelial cells type4 | 1812 |
| TAGACCATCGCATGGC-1_CRC2  | Epithelial cells type4 | 1794 |
| TGCGTGGTCTTCATGT-1_CRC2  | Epithelial cells type4 | 1727 |
| GTTAAGCAGTACGATA-1_CRC2  | Epithelial cells type4 | 1168 |
| TCGTACCCAGGCTGAA-1_CRC2  | Epithelial cells type4 | 796  |
| GTGGGTCCAGGGATTG-1_CRC2  | Epithelial cells type4 | 2777 |
| TGGACGCTCGTCTGAA-1_CRC2  | Epithelial cells type4 | 2581 |
| AGACGTTGTTCGTGAT-1_CRC2  | Epithelial cells type4 | 1781 |
| GTCACGGGTCCGTCAG-1_CRC2  | Epithelial cells type4 | 1856 |
| TACACGATCTACCTGC-1_CRC2  | Epithelial cells type4 | 2331 |
| TAGGCATAGGACACCA-1_CRC2  | Epithelial cells type4 | 2032 |
| CGAATGTAGCCGCCTA-1_CRC2  | Epithelial cells type4 | 2009 |
| CTCCTAGGTCACAAGG-1_CRC2  | Epithelial cells type4 | 2461 |
| CAGCTAATCTCGTTTA-1_CRC2  | Epithelial cells type4 | 1723 |
| AACTGGTAGCCAACAG-1_CRC2  | Epithelial cells type4 | 2495 |
| CACCTTGAGTTACGGG-1_CRC2  | Epithelial cells type4 | 2432 |
| GTCGTAAGTGCAGGTA-1_CRC2  | Epithelial cells type4 | 3058 |
| AAGCCGCTCGAATGGG-1_CRC2  | Epithelial cells type4 | 2042 |
| TCTCTAACACATGGGA-1_CRC2  | Epithelial cells type4 | 2136 |
| GCGCGATCATGTTCGAT-1_CRC2 | Epithelial cells type4 | 2112 |
| TACGGTAAGTGTACTC-1_CRC2  | Epithelial cells type4 | 2182 |
| GTGCAGCGTATGAAAC-1_CRC2  | Epithelial cells type4 | 3188 |
| GATGAAAGTCACCTAA-1_CRC2  | Epithelial cells type4 | 2606 |
| AGAGCTTGTCCGAATT-1_CRC2  | Epithelial cells type4 | 2639 |
| TACTCGCGTAGCAAAT-1_CRC2  | Epithelial cells type4 | 2622 |
| AAGGTTTCAGGAATCGC-1_CRC2 | Epithelial cells type4 | 2960 |
| ACGATGTAGCGTCAAG-1_CRC2  | Epithelial cells type4 | 2460 |
| CACATTTGTTCGTTGA-1_CRC2  | Epithelial cells type4 | 2007 |
| AACGTTGCATCGATGT-1_CRC2  | Epithelial cells type4 | 2956 |
| TCGCGAGAGACAGAGA-1_CRC2  | Epithelial cells type4 | 2370 |
| GCAGCCACATGACATC-1_CRC2  | Epithelial cells type4 | 3889 |
| GTCTCGTTCAACGGGA-1_CRC2  | Epithelial cells type4 | 4563 |
| GCTTGAATCCTATGTT-1_CRC2  | Epithelial cells type4 | 2759 |
| TTGGAACGTAGCCTAT-1_CRC2  | Epithelial cells type4 | 2801 |
| GGAGCAATCTTAGAGC-1_CRC2  | Epithelial cells type4 | 2208 |
| GACAGAGAGTCGTACT-1_CRC2  | Epithelial cells type4 | 2138 |
| GATCTAGAGCTAGTGG-1_CRC2  | Epithelial cells type4 | 2465 |
| AGCGTCGGTTTGACAC-1_CRC2  | Epithelial cells type4 | 2902 |
| CTCTGGTGTAGGGTAC-1_CRC2  | Epithelial cells type4 | 2559 |
| GACTAACCAATCGAAA-1_CRC2  | Epithelial cells type4 | 2853 |
| CCTAAAGTCAACACCA-1_CRC2  | Epithelial cells type4 | 3500 |
| TGCGGGTCATCACGTA-1_CRC2  | Epithelial cells type4 | 3113 |
| AGACGTTAGAAGAAGC-1_CRC2  | Epithelial cells type4 | 3000 |
| GGGCATCTCATGGTCA-1_CRC2  | Epithelial cells type4 | 2133 |
| TGTATTTCAGCTACCGC-1_CRC2 | Epithelial cells type4 | 1899 |
| AGTAGTCAGTCACGCC-1_CRC2  | Epithelial cells type4 | 2403 |
| AACTCAGGTGTGGTTT-1_CRC2  | Epithelial cells type4 | 2512 |
| CCTTCCCCAGCGAACA-1_CRC2  | Epithelial cells type4 | 2317 |

|                          |                        |      |
|--------------------------|------------------------|------|
| GCAGTTATCTCAACTT-1_CRC2  | Epithelial cells type4 | 2743 |
| CGATCGGAGTGGGCTA-1_CRC2  | Epithelial cells type4 | 2607 |
| GACTGCGTCTTACCGC-1_CRC2  | Epithelial cells type4 | 3363 |
| ATGCGATAGCAAATCA-1_CRC2  | Epithelial cells type4 | 2092 |
| TGCTGCTAGCTTATCG-1_CRC2  | Epithelial cells type4 | 2025 |
| AAACCTGCAGTTCATG-1_CRC2  | Epithelial cells type4 | 2748 |
| TACACGACACGTCTCT-1_CRC2  | Epithelial cells type4 | 2448 |
| ACGGAGATCTCCCTGA-1_CRC2  | Epithelial cells type4 | 1880 |
| CACATTTGTTGGGACA-1_CRC2  | Epithelial cells type4 | 2289 |
| GAATGAAAGGCACATG-1_CRC2  | Epithelial cells type4 | 2147 |
| CTGTTTAAGTGGAGTC-1_CRC2  | Epithelial cells type4 | 2360 |
| AGCGTCGAGACAGGCT-1_CRC2  | Epithelial cells type4 | 2466 |
| GCGAGAAAGAACTCGG-1_CRC2  | Epithelial cells type4 | 2603 |
| CCTCTGACAACAACCT-1_CRC3  | Epithelial cells type4 | 2190 |
| CGTTGGGCATTTTCAGG-1_CRC3 | Epithelial cells type4 | 1380 |
| GTAGGCCAGACTGGGT-1_CRC3  | Epithelial cells type4 | 1866 |
| GGATTACTCTACCAGA-1_CRC3  | Epithelial cells type4 | 860  |
| ACGATGTGTTCAGTAC-1_CRC3  | Epithelial cells type4 | 896  |
| GCATGCGTCTTTAGGG-1_CRC3  | Epithelial cells type4 | 976  |
| AGGGATGGTCTAACGT-1_CRC3  | Epithelial cells type4 | 1253 |
| TTTATGCAGATCACGG-1_CRC3  | Epithelial cells type4 | 1000 |
| GGCTGGTGTACATCCA-1_CRC3  | Epithelial cells type4 | 1636 |
| CTCAGAAAGGGTGTG-1_CRC3   | Epithelial cells type4 | 938  |
| GCACTCTAGAGGGCTT-1_CRC3  | Epithelial cells type4 | 1083 |
| TGCTACCGTGTGCCTG-1_CRC3  | Epithelial cells type4 | 804  |
| CCTTCCCGTCCAGTAT-1_CRC3  | Epithelial cells type4 | 726  |
| GTAAAGCTCGTACGGC-1_CRC3  | Epithelial cells type4 | 835  |
| TCGTAGACAAACGCGA-1_CRC3  | Epithelial cells type4 | 1419 |
| CACAGTATCGGACAAG-1_CRC3  | Epithelial cells type4 | 699  |
| GTACTCCTCCACTGGG-1_CRC3  | Epithelial cells type4 | 708  |
| CTTACCGCATCTACGA-1_CRC3  | Epithelial cells type4 | 621  |
| GCTCTGTAGATCACGG-1_CRC3  | Epithelial cells type4 | 701  |
| TTCTTAGGTACCGCTG-1_CRC3  | Epithelial cells type4 | 685  |
| GCGGGTTGTGCCTTGG-1_CRC3  | Epithelial cells type4 | 1189 |
| GTCACGGGTCCATGAT-1_CRC3  | Epithelial cells type4 | 830  |
| TGAAAGAGTCGAACAG-1_CRC3  | Epithelial cells type4 | 931  |
| GACCAATGTGAAGGCT-1_CRC3  | Epithelial cells type4 | 960  |
| GGGATGAAGAATCTCC-1_CRC3  | Epithelial cells type4 | 963  |
| CCAGCGAAGTACGCCC-1_CRC3  | Epithelial cells type4 | 1320 |
| CCTCTGAAGAGTAAGG-1_CRC3  | Epithelial cells type4 | 944  |
| AGATTGCTCACGCGGT-1_CRC3  | Epithelial cells type4 | 985  |
| ATGAGGGGTCAATGTC-1_CRC3  | Epithelial cells type4 | 739  |
| ACACCCTGTCGCTTTC-1_CRC3  | Epithelial cells type4 | 815  |
| CTTAACTGTAAGGATT-1_CRC3  | Epithelial cells type4 | 983  |
| TTAGTTCGTAGTAGTA-1_CRC3  | Epithelial cells type4 | 749  |
| TACCTTAGTCTCCATC-1_CRC3  | Epithelial cells type4 | 960  |
| CGGACTGCAGCTGTTA-1_CRC3  | Epithelial cells type4 | 1190 |
| GACACGCTCTGTGCAA-1_CRC1  | Epithelial cells type4 | 968  |
| ATCCACCGTGACGGTA-1_CRC3  | Epithelial cells type4 | 575  |
| CCGGTAGAGAAGGTTT-1_CRC3  | Epithelial cells type4 | 670  |
| CGAACATGTGATGTCT-1_CRC3  | Epithelial cells type4 | 762  |

|                         |                        |      |
|-------------------------|------------------------|------|
| GTGCGGTGTAGCTGCC-1_CRC3 | Epithelial cells type4 | 483  |
| CGAGAAGTCCCAAGAT-1_CRC3 | Epithelial cells type4 | 857  |
| ACCCACTGTCACTTCC-1_CRC3 | Epithelial cells type4 | 703  |
| AGGTCCGCAAGGACAC-1_CRC3 | Epithelial cells type4 | 837  |
| CGAGCACAGCACCGCT-1_CRC3 | Epithelial cells type4 | 907  |
| CCCAATCAGGACAGAA-1_CRC3 | Epithelial cells type4 | 856  |
| CAACTAGCAGAAGCAC-1_CRC3 | Epithelial cells type4 | 558  |
| TAGCCGGTCCGCAGTG-1_CRC3 | Epithelial cells type4 | 717  |
| AGAATAGGTATCTGCA-1_CRC3 | Epithelial cells type4 | 2557 |
| CAGCATAGTCGCGTGT-1_CRC3 | Epithelial cells type4 | 2364 |
| CTAAGACAGTCCGGTC-1_CRC3 | Epithelial cells type4 | 1390 |
| GGAATAAAGCTAACTC-1_CRC3 | Epithelial cells type4 | 1753 |
| ATGAGGGAGCCAGGAT-1_CRC3 | Epithelial cells type4 | 1638 |
| TGGCCAGTCCAACTG-1_CRC3  | Epithelial cells type4 | 1827 |
| CCTAAAGTCCTATTCA-1_CRC3 | Epithelial cells type4 | 1492 |
| TCATTACAGCCCAATT-1_CRC3 | Epithelial cells type4 | 1509 |
| TGACTTTTACGAGGTA-1_CRC3 | Epithelial cells type4 | 1392 |
| AGGTCCGTCAGTGTTG-1_CRC3 | Epithelial cells type4 | 982  |
| GATGAAATCTGCTGTC-1_CRC3 | Epithelial cells type4 | 989  |
| ACCCACTGTCCCTTGT-1_CRC3 | Epithelial cells type4 | 939  |
| TGCTACCAGATGCCAG-1_CRC3 | Epithelial cells type4 | 1492 |
| ACTTTCAGTCACACGC-1_CRC3 | Epithelial cells type4 | 1141 |
| TGAGCATGTCCGAACC-1_CRC3 | Epithelial cells type4 | 1034 |
| AAGTCTGGTCTCCACT-1_CRC3 | Epithelial cells type4 | 1346 |
| CTTGGCTTCCGGGTGT-1_CRC3 | Epithelial cells type4 | 1239 |
| GCGCGATAGTTCGCGC-1_CRC3 | Epithelial cells type4 | 1414 |
| TCTGAGACATTAGCCA-1_CRC3 | Epithelial cells type4 | 1554 |
| ATGTGTGGTGGCGAAT-1_CRC3 | Epithelial cells type4 | 2061 |
| CTCTAATTCGTGTAGT-1_CRC3 | Epithelial cells type4 | 1538 |
| ATTCTACGTTAAGAAC-1_CRC3 | Epithelial cells type4 | 1973 |
| AGCCTAAAGGCATTGG-1_CRC3 | Epithelial cells type4 | 1913 |
| CTCCTAGAGAATAGGG-1_CRC3 | Epithelial cells type4 | 1785 |
| GCTGCAGTCGTACCGG-1_CRC2 | Epithelial cells type4 | 1263 |
| TCAACGATCTCCCTGA-1_CRC2 | Epithelial cells type4 | 2147 |
| GAAACTCAGCAAATCA-1_CRC2 | Epithelial cells type4 | 934  |
| TCGCGTTCAATAGAGT-1_CRC2 | Epithelial cells type4 | 286  |
| CCAATCCTCGTAGGAG-1_CRC2 | Epithelial cells type4 | 943  |
| TACGGTATCAGGCCCA-1_CRC2 | Epithelial cells type4 | 510  |
| GAATAAGTCTCTAAGG-1_CRC2 | Epithelial cells type4 | 1008 |
| GTACGTACAGTCGTGC-1_CRC2 | Epithelial cells type4 | 829  |
| AGCTTGACATACGCTA-1_CRC2 | Epithelial cells type4 | 1187 |
| GTAGTCAAGTTCGATC-1_CRC2 | Epithelial cells type4 | 1229 |
| CACAGTAGTACTCTCC-1_CRC2 | Epithelial cells type4 | 1452 |
| ACTTACTTCTGTGCAA-1_CRC2 | Epithelial cells type4 | 1599 |
| GCAATCACACCTATC-1_CRC2  | Epithelial cells type4 | 1796 |
| GCGCAACTCGGACAAG-1_CRC2 | Epithelial cells type4 | 1974 |
| CGGAGCTCATTGCGGC-1_CRC2 | Epithelial cells type4 | 1390 |
| GGAAAGCAGGCAGTCA-1_CRC2 | Epithelial cells type4 | 1665 |
| AGTCTTTCATTACGAC-1_CRC2 | Epithelial cells type4 | 2114 |
| ATGGGAGTCCGAAGAG-1_CRC2 | Epithelial cells type4 | 1269 |
| CCCTCCTAGATCACGG-1_CRC2 | Epithelial cells type4 | 2195 |



|                         |                        |      |
|-------------------------|------------------------|------|
| ACATCAGTCCATTCTA-1_CRC2 | Epithelial cells type4 | 1984 |
| TAGAGCTTCACTCTTA-1_CRC2 | Epithelial cells type4 | 2090 |
| AACTCCCCATGACATC-1_CRC2 | Epithelial cells type4 | 2082 |
| CACATAGCATTACGAC-1_CRC2 | Epithelial cells type4 | 1724 |
| ACCAGTACACGGTAAG-1_CRC2 | Epithelial cells type4 | 1108 |
| ACAGCCGCACTCAGGC-1_CRC1 | Epithelial cells type4 | 1107 |
| GTCACGGTCGCGGATC-1_CRC2 | Epithelial cells type4 | 1010 |
| TGCTGCTGTCCAGTGC-1_CRC2 | Epithelial cells type4 | 647  |
| CCACTACCAATAAGCA-1_CRC3 | Epithelial cells type4 | 1687 |
| TAGAGCTGTAAACGCG-1_CRC2 | Epithelial cells type4 | 1690 |
| TCGTACCTCCGCAAGC-1_CRC2 | Epithelial cells type4 | 1074 |
| GAACCTAAGCTACCGC-1_CRC3 | Epithelial cells type4 | 1617 |
| TTAGGACCATCGGACC-1_CRC3 | Epithelial cells type4 | 1559 |
| ACTATCTGTTTGTGTG-1_CRC3 | Epithelial cells type4 | 1158 |
| ATTTCTGCAATTCCTT-1_CRC3 | Epithelial cells type4 | 1301 |
| CCTTTCTTCCGCAGTG-1_CRC3 | Epithelial cells type4 | 2259 |
| ATCCGAAAGGCTATCT-1_CRC2 | Epithelial cells type4 | 756  |
| ACTGTCCGTCTGCAAT-1_CRC2 | Epithelial cells type4 | 686  |
| CCATTCGCACAAGACG-1_CRC2 | Epithelial cells type4 | 978  |
| ACGGCCACATTCACTT-1_CRC3 | Epithelial cells type4 | 1616 |
| GAACGGACAATAACGA-1_CRC3 | Epithelial cells type4 | 1307 |
| GCATGTATCGGATGTT-1_CRC0 | Epithelial cells type4 | 2731 |
| TACACGAAGGACAGCT-1_CRC0 | Epithelial cells type4 | 2011 |
| TACAGTGCATATACGC-1_CRC0 | Epithelial cells type4 | 2285 |
| CAGGTGCCAAGAAGAG-1_CRC0 | Epithelial cells type4 | 1107 |
| ATGGGAGGTCTGCGGT-1_CRC0 | Epithelial cells type4 | 821  |
| CGCCAAGTCCCTCTTT-1_CRC0 | Epithelial cells type4 | 780  |
| GGAAAGCTCGCTAGCG-1_CRC0 | Epithelial cells type4 | 1211 |
| CCTTTCTAGGAAGTGC-1_CRC1 | Epithelial cells type4 | 1398 |
| CGTTGGGAGACAGACC-1_CRC1 | Epithelial cells type4 | 787  |
| GGAAAGCGTCATGCAT-1_CRC1 | Epithelial cells type4 | 780  |
| CTTTGCGTCCAGAAGG-1_CRC1 | Epithelial cells type4 | 1465 |
| TTCTCAATCATGTCCC-1_CRC1 | Epithelial cells type4 | 1092 |
| CAGAATCCAGACTCGC-1_CRC1 | Epithelial cells type5 | 1402 |
| TCAGCAAAGGAATTAC-1_CRC1 | Epithelial cells type5 | 1405 |
| GTAGTCAAGGAGCGAG-1_CRC1 | Epithelial cells type5 | 1124 |
| GGACGTCGTAAACCTC-1_CRC1 | Epithelial cells type5 | 516  |
| AGCTCTCGTTCTCATT-1_CRC1 | Epithelial cells type5 | 946  |
| GCTCCTAAGGAGTAGA-1_CRC1 | Epithelial cells type5 | 1411 |
| ACTGAACCAAAGAATC-1_CRC1 | Epithelial cells type5 | 1323 |
| ACACCGGAGCGACGTA-1_CRC1 | Epithelial cells type5 | 1169 |
| CTCTGGTGTGCGAAAC-1_CRC1 | Epithelial cells type5 | 1048 |
| ATTGGACCAGATCGGA-1_CRC1 | Epithelial cells type5 | 1146 |
| CAGCATAGTCCAATA-1_CRC1  | Epithelial cells type5 | 1229 |
| GCAAACCTCCCAGGTG-1_CRC1 | Epithelial cells type5 | 839  |
| GGTGCGTGTGGGTCAA-1_CRC1 | Epithelial cells type5 | 1359 |
| CGAGAAGAGGAGTCTG-1_CRC1 | Epithelial cells type5 | 1528 |
| GAACCTATCTCGCTTG-1_CRC1 | Epithelial cells type5 | 1270 |
| ATGAGGGGTGTCAATC-1_CRC1 | Epithelial cells type5 | 1424 |
| CCACGGATCCAAGCCG-1_CRC1 | Epithelial cells type5 | 1177 |
| CGGAGTCAGTAAGTAC-1_CRC1 | Epithelial cells type5 | 1092 |

|                          |                        |      |
|--------------------------|------------------------|------|
| AGCATACGTATAGTAG-1_CRC1  | Epithelial cells type5 | 1372 |
| TCAGCAAAGAATGTTG-1_CRC1  | Epithelial cells type5 | 1022 |
| TTGAACGTCAGCTTAG-1_CRC1  | Epithelial cells type5 | 1162 |
| CAAGATCGTTGTCGCG-1_CRC1  | Epithelial cells type5 | 5800 |
| GTCGGGTTTCATGGTCA-1_CRC2 | Epithelial cells type5 | 1625 |
| GATCAGTAGGCATGTG-1_CRC1  | Epithelial cells type5 | 1247 |
| AGGCCGTCACTTCGAA-1_CRC1  | Epithelial cells type5 | 891  |
| GCCTCTACACCTCGTT-1_CRC1  | Epithelial cells type5 | 1020 |
| ACATGGTAGTGTGAAT-1_CRC1  | Epithelial cells type5 | 872  |
| CAGCTAACAGCTGTGC-1_CRC1  | Epithelial cells type5 | 1121 |
| CCTATTAGTTAGAACA-1_CRC2  | Epithelial cells type5 | 1611 |
| ACTGATGCACAGGTTT-1_CRC2  | Epithelial cells type5 | 1187 |
| AGCGTCGTCTTTAGTC-1_CRC2  | Epithelial cells type5 | 683  |
| TGAGCATCATCACAAC-1_CRC2  | Epithelial cells type5 | 603  |
| CCTTCGATCATTATCC-1_CRC2  | Epithelial cells type5 | 420  |
| GTGTTAGTCTTGTCAT-1_CRC2  | Epithelial cells type5 | 375  |
| GCGCCAAAGGAGCGTT-1_CRC2  | Epithelial cells type5 | 510  |
| TCAGGATAGGTGCAAC-1_CRC2  | Epithelial cells type5 | 410  |
| CATGGCGGTCTGAATCT-1_CRC2 | Epithelial cells type5 | 707  |
| TGCGGGTTCTCATTC-1_CRC2   | Epithelial cells type5 | 197  |
| AGCGTATCAGCTGCAC-1_CRC2  | Epithelial cells type5 | 247  |
| TCGGTAAGTACATGTC-1_CRC2  | Epithelial cells type5 | 288  |
| CACAGGCAGGTGGGTT-1_CRC2  | Epithelial cells type5 | 1244 |
| CGTGTAAGGCCCTTG-1_CRC2   | Epithelial cells type5 | 989  |
| ACGATGTGTTTCGGCAC-1_CRC2 | Epithelial cells type5 | 904  |
| CTACACCCAGTTTACG-1_CRC2  | Epithelial cells type5 | 968  |
| TCACAAGAGGAATCGC-1_CRC2  | Epithelial cells type5 | 1085 |
| CATTATCAGCGTAGTG-1_CRC2  | Epithelial cells type5 | 1448 |
| GATCAGTAGAGTACAT-1_CRC2  | Epithelial cells type5 | 1091 |
| CAGCCGAAGTCAATAG-1_CRC3  | Epithelial cells type5 | 933  |
| ATTGGTGCAGGTTTCA-1_CRC2  | Epithelial cells type5 | 593  |
| TTTATGCAGCTGTCTA-1_CRC2  | Epithelial cells type5 | 820  |
| CTAACTTCAATAGAGT-1_CRC2  | Epithelial cells type5 | 520  |
| GACCAATGTATTCGTG-1_CRC2  | Epithelial cells type5 | 469  |
| GTGTTAGCATCCGCGA-1_CRC2  | Epithelial cells type5 | 970  |
| TACTCGCCACATGACT-1_CRC2  | Epithelial cells type5 | 689  |
| ATGTGTGCATAAAGGT-1_CRC3  | Epithelial cells type5 | 881  |
| GCCAAATAGCCTATGT-1_CRC2  | Epithelial cells type5 | 1399 |
| AGCATACGTACCCAAT-1_CRC2  | Epithelial cells type5 | 623  |
| CAGCAGCAGCGAAGGG-1_CRC2  | Epithelial cells type5 | 979  |
| GCGCAGTCAGCTGTGC-1_CRC2  | Epithelial cells type5 | 1223 |
| TCATTACAGAGTTGGC-1_CRC2  | Epithelial cells type5 | 866  |
| CTCATTAGTACGCACC-1_CRC1  | Epithelial cells type5 | 1986 |
| CGTTGGGAGATGCCAG-1_CRC1  | Epithelial cells type5 | 1168 |
| CTCGAGGAGCCCTAAT-1_CRC1  | Epithelial cells type5 | 1104 |
| TTTACTGAGCTACCGC-1_CRC1  | Epithelial cells type5 | 1285 |
| CTAAGACTCCAAATGC-1_CRC1  | Epithelial cells type5 | 1211 |
| GTACGTAAGACACTAA-1_CRC1  | Epithelial cells type5 | 856  |
| GTAGTCAAGATGCGAC-1_CRC1  | Epithelial cells type5 | 1487 |
| GGACGTCGTCTAGCCG-1_CRC1  | Epithelial cells type5 | 1609 |
| GGTGTTAGTCATTAGC-1_CRC1  | Epithelial cells type5 | 1490 |

|                         |                        |      |
|-------------------------|------------------------|------|
| GAGGTGATCTAACGGT-1_CRC1 | Epithelial cells type5 | 1101 |
| TCATTACCATGTCTCC-1_CRC1 | Epithelial cells type5 | 1373 |
| AGTGAGGCATGAAGTA-1_CRC1 | Epithelial cells type5 | 1303 |
| GTTTCTAGTTCCTTG-1_CRC1  | Epithelial cells type5 | 1104 |
| TCGCGAGGTAAACGCG-1_CRC1 | Epithelial cells type5 | 1742 |
| TCACGAAGTCTTCGTC-1_CRC1 | Epithelial cells type5 | 1073 |
| TTAGGCAAGTGGAGTC-1_CRC1 | Epithelial cells type5 | 831  |
| GAGGTGACACACCGCA-1_CRC1 | Epithelial cells type5 | 871  |
| AGTGAGGAGGGTGTGT-1_CRC1 | Epithelial cells type5 | 1316 |
| ATTTCTGAGTGCCAGA-1_CRC1 | Epithelial cells type5 | 914  |
| CTTACCGTCAGCAACT-1_CRC1 | Epithelial cells type5 | 1015 |
| ATTGGTGCATATGCTG-1_CRC1 | Epithelial cells type5 | 1024 |
| GAGCAGATCTTGTATC-1_CRC1 | Epithelial cells type5 | 757  |
| CAGCGACTCGTTACAG-1_CRC1 | Epithelial cells type5 | 1183 |
| TCATTACGTACGACCC-1_CRC1 | Epithelial cells type5 | 1232 |
| GTATCTTTCTAAGCCA-1_CRC1 | Epithelial cells type5 | 1054 |
| CTAACTTCAAGCGAGT-1_CRC1 | Epithelial cells type5 | 1064 |
| AAGGTTCCACAGGAGT-1_CRC1 | Epithelial cells type5 | 1029 |
| CGATGGCAGTTCCACA-1_CRC1 | Epithelial cells type5 | 903  |
| AGGCCGTGTAACGCGA-1_CRC1 | Epithelial cells type5 | 758  |
| CCCTCCTGTGATGATA-1_CRC1 | Epithelial cells type5 | 916  |
| TGTTCCGCAATCCAAC-1_CRC1 | Epithelial cells type5 | 995  |
| ACGGCCACATAACCTG-1_CRC1 | Epithelial cells type5 | 1126 |
| TCGCGAGTCGCTAGCG-1_CRC1 | Epithelial cells type5 | 962  |
| AGGTCCGCAAATCCGT-1_CRC1 | Epithelial cells type5 | 659  |
| ATTGGACAGTATGACA-1_CRC1 | Epithelial cells type5 | 1162 |
| CCTACCAGTCCGTGAC-1_CRC1 | Epithelial cells type5 | 1017 |
| AGGGTGAGTACCATCA-1_CRC1 | Epithelial cells type5 | 994  |
| CGTAGGCGTCTCTCTG-1_CRC1 | Epithelial cells type5 | 945  |
| CTACATTAGAGACGAA-1_CRC1 | Epithelial cells type5 | 999  |
| GCAGCCACAGTATGCT-1_CRC1 | Epithelial cells type5 | 1657 |
| GCCTCTAGTGCCTTG-1_CRC1  | Epithelial cells type5 | 1019 |
| GGAATAATCTGCTGCT-1_CRC1 | Epithelial cells type5 | 1318 |
| CCATTCGCACGCATCG-1_CRC1 | Epithelial cells type5 | 1283 |
| TGAGCCGTCAGTTGAC-1_CRC1 | Epithelial cells type5 | 1183 |
| TTCTCCTGTTTGCGCG-1_CRC1 | Epithelial cells type5 | 1457 |
| TACCTTAAGATGGCGT-1_CRC1 | Epithelial cells type5 | 1316 |
| CGGACTGCAAACGTGC-1_CRC1 | Epithelial cells type5 | 1273 |
| TACCTTAAGAGCAATT-1_CRC1 | Epithelial cells type5 | 1111 |
| ACTGATGGTCGGCACT-1_CRC1 | Epithelial cells type5 | 1118 |
| CGCGGTAAGGTGTGGT-1_CRC1 | Epithelial cells type5 | 1279 |
| CGTTGGGTCTGCCCTA-1_CRC1 | Epithelial cells type5 | 1288 |
| TGCACCTGTCATATCG-1_CRC1 | Epithelial cells type5 | 1323 |
| TTCTACACAGCGATCC-1_CRC1 | Epithelial cells type5 | 1198 |
| CAACTAGAGAGCAATT-1_CRC1 | Epithelial cells type5 | 1168 |
| AACTGGTAGGATGGTC-1_CRC1 | Epithelial cells type5 | 1078 |
| GCGCAGTCCCAGGTG-1_CRC1  | Epithelial cells type5 | 1112 |
| TCGTAGAGTCGGCATC-1_CRC1 | Epithelial cells type5 | 1382 |
| CTTTGCGGTGATGATA-1_CRC1 | Epithelial cells type5 | 981  |
| TGACTAGGTTCAACCA-1_CRC1 | Epithelial cells type5 | 1424 |
| GACTGCGAGTGTGAA-1_CRC1  | Epithelial cells type5 | 958  |

|                          |                        |      |
|--------------------------|------------------------|------|
| GATTCAGGTGCAACGA-1_CRC1  | Epithelial cells type5 | 837  |
| AGCATACTCGTCCGTT-1_CRC1  | Epithelial cells type5 | 1241 |
| TACGGTAAGGAGTCTG-1_CRC1  | Epithelial cells type5 | 1388 |
| CTCACACTCAACACCA-1_CRC1  | Epithelial cells type5 | 1471 |
| CTTAAGTGTTCATATCG-1_CRC1 | Epithelial cells type5 | 1635 |
| TTTATGCGTACAGACG-1_CRC1  | Epithelial cells type5 | 1256 |
| GAGCAGACAGTGACAG-1_CRC1  | Epithelial cells type5 | 1269 |
| ACATACGAGTAGTGCG-1_CRC1  | Epithelial cells type5 | 1333 |
| AGCATACAGACACGAC-1_CRC1  | Epithelial cells type5 | 1394 |
| GCACATACACCATCCT-1_CRC1  | Epithelial cells type5 | 1285 |
| TAAGTGCTCTTGTACT-1_CRC1  | Epithelial cells type5 | 2098 |
| CGAACATAGGCTACGA-1_CRC1  | Epithelial cells type5 | 1576 |
| GGTGTTACATATACCG-1_CRC1  | Epithelial cells type5 | 1780 |
| GTACTCCGTCCAGTGC-1_CRC1  | Epithelial cells type5 | 2236 |
| TAAACCGTCAAGATCC-1_CRC1  | Epithelial cells type5 | 1423 |
| GACCTGGCATTGCCC-1_CRC1   | Epithelial cells type5 | 1524 |
| GCTGCTTCATTGGGCC-1_CRC1  | Epithelial cells type5 | 1121 |
| AACTCTTAGCTAGTGG-1_CRC1  | Epithelial cells type5 | 1456 |
| GAACCTACATTAGGCT-1_CRC1  | Epithelial cells type5 | 1285 |
| GCGCAACAGATTACCC-1_CRC1  | Epithelial cells type5 | 1026 |
| CGTGTCTCACCACCAG-1_CRC1  | Epithelial cells type5 | 1212 |
| GATGAGGAGTCATCCA-1_CRC1  | Epithelial cells type5 | 1345 |
| GTACTTTAGTTAGCGG-1_CRC1  | Epithelial cells type5 | 1336 |
| TGCGGGTAGGTGATAT-1_CRC1  | Epithelial cells type5 | 1103 |
| TTGGCAATCCCGGATG-1_CRC1  | Epithelial cells type5 | 992  |
| ACTGAGTCATGCAACT-1_CRC1  | Epithelial cells type5 | 1051 |
| CGACTTCAGTACACCT-1_CRC1  | Epithelial cells type5 | 1142 |
| ACGGGTCGTAAGAGAG-1_CRC1  | Epithelial cells type5 | 1030 |
| TCTCATAGTGATGTGG-1_CRC1  | Epithelial cells type5 | 1267 |
| AGTCTTTTCCTGCCAT-1_CRC1  | Epithelial cells type5 | 1095 |
| GTGAAGGGTGAGGGTT-1_CRC1  | Epithelial cells type5 | 868  |
| CTGTTTAGTTGGTTTG-1_CRC1  | Epithelial cells type5 | 1070 |
| CGGACTGTCACTATTC-1_CRC1  | Epithelial cells type5 | 830  |
| CGGCTAGTCTTCAACT-1_CRC1  | Epithelial cells type5 | 1267 |
| AACCGCGAGCCGCCTA-1_CRC1  | Epithelial cells type5 | 996  |
| TCGAGGCAGCTTATCG-1_CRC1  | Epithelial cells type5 | 940  |
| ATTACTCTCAGGCCCA-1_CRC1  | Epithelial cells type5 | 1438 |
| CTAATGGCACCCATTC-1_CRC1  | Epithelial cells type5 | 1247 |
| TTTCCTCCAGAGTGTG-1_CRC1  | Epithelial cells type5 | 1392 |
| CGGAGTCGTAAGGATT-1_CRC1  | Epithelial cells type5 | 1167 |
| TAGCCGGAGCAGATCG-1_CRC1  | Epithelial cells type5 | 1333 |
| GAGGTGATCTAACTTC-1_CRC1  | Epithelial cells type5 | 1130 |
| CGGTTAATCAGGATCT-1_CRC1  | Epithelial cells type5 | 1393 |
| GGGAATGCAGACTCGC-1_CRC1  | Epithelial cells type5 | 1815 |
| TAAGCGTAGAGCAATT-1_CRC1  | Epithelial cells type5 | 1276 |
| AAAGTAGGTGACTACT-1_CRC1  | Epithelial cells type5 | 1533 |
| GTATCTTAGACTAAGT-1_CRC1  | Epithelial cells type5 | 1591 |
| TCGTACCTCACAATGC-1_CRC1  | Epithelial cells type5 | 1208 |
| CAAGGCCTCTCGATGA-1_CRC1  | Epithelial cells type5 | 1696 |
| TGGACGCTCAGCGATT-1_CRC1  | Epithelial cells type5 | 1323 |
| TTGTAGGGTTGAGGTG-1_CRC1  | Epithelial cells type5 | 1629 |

|                          |                        |      |
|--------------------------|------------------------|------|
| TCAGGTAAGTGAAGAG-1_CRC1  | Epithelial cells type5 | 1096 |
| TGCCCATAGACTCGGA-1_CRC1  | Epithelial cells type5 | 1311 |
| GCACTCTAGACTAGAT-1_CRC1  | Epithelial cells type5 | 1755 |
| TTTACTGTCAGTCAGT-1_CRC1  | Epithelial cells type5 | 1536 |
| CTGCTGTAGAGCTGGT-1_CRC1  | Epithelial cells type5 | 1524 |
| CTAGAGTTCACCATAG-1_CRC1  | Epithelial cells type5 | 1263 |
| CAAGGCCAGGTGTGGT-1_CRC1  | Epithelial cells type5 | 1196 |
| CATCAGAAGACTGGGT-1_CRC1  | Epithelial cells type5 | 1373 |
| ATCGAGTCACCTCGTT-1_CRC1  | Epithelial cells type5 | 1705 |
| CCTCAGTGTTCGTTGA-1_CRC1  | Epithelial cells type5 | 1421 |
| TCGCGTTCACACGCTG-1_CRC1  | Epithelial cells type5 | 1625 |
| TGAGAGGAGTACGATA-1_CRC1  | Epithelial cells type5 | 1456 |
| CACAACTCCTATTCA-1_CRC1   | Epithelial cells type5 | 1809 |
| CCCAATCGTCAAGCGA-1_CRC1  | Epithelial cells type5 | 1504 |
| GTCTTCGCACTATCTT-1_CRC1  | Epithelial cells type5 | 1499 |
| CGATGGCCAGCATGAG-1_CRC1  | Epithelial cells type5 | 1504 |
| GATCGCGAGTATCTCG-1_CRC1  | Epithelial cells type5 | 1097 |
| AAGCCGCCATCACGAT-1_CRC1  | Epithelial cells type5 | 1183 |
| CTCGTACCATTGGGCC-1_CRC1  | Epithelial cells type5 | 1430 |
| CGTCACTCACCAACCG-1_CRC1  | Epithelial cells type5 | 1312 |
| CGAGCACGTCTGCGGT-1_CRC1  | Epithelial cells type5 | 1096 |
| CGCTTCATCTTGTATC-1_CRC1  | Epithelial cells type5 | 1098 |
| CAGATCATCGGAAATA-1_CRC1  | Epithelial cells type5 | 1303 |
| TCAACGAAGTTTGC GT-1_CRC1 | Epithelial cells type5 | 1367 |
| AGGGTGAGTCTTCAAG-1_CRC1  | Epithelial cells type5 | 1594 |
| GAAACTCAGCCAACAG-1_CRC1  | Epithelial cells type5 | 958  |
| AGCTCCTAGTACGTTC-1_CRC1  | Epithelial cells type5 | 942  |
| GCTTGAAAGGAGTAGA-1_CRC1  | Epithelial cells type5 | 1192 |
| ACTGTCCAGTTCGATC-1_CRC1  | Epithelial cells type5 | 1437 |
| CTCGGAGGTCTAGTGT-1_CRC1  | Epithelial cells type5 | 967  |
| CTGAAACTCCGAGCCA-1_CRC1  | Epithelial cells type5 | 1237 |
| GGATTACAGCCTTGAT-1_CRC1  | Epithelial cells type5 | 1030 |
| GGCCGATTCAAGATCC-1_CRC1  | Epithelial cells type5 | 1147 |
| TGAGGGAGTTGCCTCT-1_CRC1  | Epithelial cells type5 | 809  |
| CCTTTCTCATGAACCT-1_CRC1  | Epithelial cells type5 | 1230 |
| GCCAAATTCGACCAGC-1_CRC1  | Epithelial cells type5 | 877  |
| TATCAGGCAAACAACA-1_CRC1  | Epithelial cells type5 | 1090 |
| CTGCGGACAATGGATA-1_CRC1  | Epithelial cells type5 | 1025 |
| CTCGAGGAGTAACCCT-1_CRC1  | Epithelial cells type5 | 875  |
| GGAATAAAGGGCTTCC-1_CRC1  | Epithelial cells type5 | 936  |
| AGAGCGAAGCACGCCT-1_CRC1  | Epithelial cells type5 | 1123 |
| CGGTTAATCGTGGGAA-1_CRC1  | Epithelial cells type5 | 1010 |
| CAGCATAGTCGCATCG-1_CRC1  | Epithelial cells type5 | 825  |
| ACGATGTCACGAGAGT-1_CRC1  | Epithelial cells type5 | 997  |
| CAAGAAATCCCGGATG-1_CRC1  | Epithelial cells type5 | 922  |
| CTAACTTCAAGAGTCG-1_CRC1  | Epithelial cells type5 | 1244 |
| ATAAGAGTCGTCCAGG-1_CRC1  | Epithelial cells type5 | 1124 |
| ATTACTCGTTCAGGCC-1_CRC1  | Epithelial cells type5 | 918  |
| CGTCCATCAAGTAATG-1_CRC1  | Epithelial cells type5 | 1172 |
| CGAGAAGTCCGCATCT-1_CRC1  | Epithelial cells type5 | 936  |
| GAACCTAGTGGTCCGT-1_CRC1  | Epithelial cells type5 | 1040 |

|                          |                        |      |
|--------------------------|------------------------|------|
| GGAGCAAAGGGATGGG-1_CRC1  | Epithelial cells type5 | 1168 |
| ACGGGCTGTACGAAAT-1_CRC1  | Epithelial cells type5 | 747  |
| CGCTATCGTGCAGTAG-1_CRC1  | Epithelial cells type5 | 955  |
| GCATGCGGTGCATCTA-1_CRC1  | Epithelial cells type5 | 1504 |
| GGGTTGCAGTGGTAAT-1_CRC1  | Epithelial cells type5 | 1198 |
| AGCTCTCAGGACAGAA-1_CRC1  | Epithelial cells type5 | 1971 |
| AGTTGGTAGAGTGAGA-1_CRC1  | Epithelial cells type5 | 1269 |
| TGTGTTTCAAGCCTAT-1_CRC1  | Epithelial cells type5 | 1480 |
| CGGAGCTCAGTAAGAT-1_CRC1  | Epithelial cells type5 | 1697 |
| TGTCCCAGTCTAGTCA-1_CRC1  | Epithelial cells type5 | 1509 |
| GTTTCATTCACAAGTAA-1_CRC1 | Epithelial cells type5 | 1154 |
| CTCGAGGAGTGCCATT-1_CRC1  | Epithelial cells type5 | 1339 |
| GTGTGCGTCAGCAACT-1_CRC1  | Epithelial cells type5 | 1523 |
| AGGGATGCAGGATCGA-1_CRC1  | Epithelial cells type5 | 1165 |
| TCGCGAGCATGCCCGA-1_CRC1  | Epithelial cells type5 | 1392 |
| GTACTCCGTCTTCGTC-1_CRC1  | Epithelial cells type5 | 873  |
| CCTACACCACAGACAG-1_CRC1  | Epithelial cells type5 | 984  |
| TTAGGCACACATTAGC-1_CRC1  | Epithelial cells type5 | 1248 |
| TACCTTAAGCAGGTCA-1_CRC1  | Epithelial cells type5 | 991  |
| TACTCGCTCGGAGCAA-1_CRC1  | Epithelial cells type5 | 867  |
| TATGCCCAGTTAGGTA-1_CRC1  | Epithelial cells type5 | 906  |
| CTCCTAGGTGCCTGTG-1_CRC1  | Epithelial cells type5 | 1259 |
| AACTCCCCAGGACCCT-1_CRC1  | Epithelial cells type5 | 1016 |
| GTTTCGGGAGGATGTAT-1_CRC1 | Epithelial cells type5 | 986  |
| TTGCGTTCGTATATGAG-1_CRC1 | Epithelial cells type5 | 1718 |
| GCTCCTAAGGATTCGG-1_CRC1  | Epithelial cells type5 | 840  |
| CGATCGGTCATTCACT-1_CRC1  | Epithelial cells type5 | 927  |
| TATGCCCCACACGCTG-1_CRC1  | Epithelial cells type5 | 872  |
| AACTCAGCACGTCTCT-1_CRC1  | Epithelial cells type5 | 1176 |
| CACCAGGAGACTAAGT-1_CRC1  | Epithelial cells type5 | 1015 |
| CGGAGCTTCGAATGGG-1_CRC1  | Epithelial cells type5 | 1006 |
| ACGGCCACATCACCT-1_CRC1   | Epithelial cells type5 | 773  |
| TGCGGGTGTATATGAG-1_CRC1  | Epithelial cells type5 | 1032 |
| ACTGTCCGTAGAGTGC-1_CRC1  | Epithelial cells type5 | 1221 |
| AGGCCACCACCACCAG-1_CRC1  | Epithelial cells type5 | 1227 |
| CAGCTGGGTGGTCCGT-1_CRC1  | Epithelial cells type5 | 1358 |
| ACAGCTACAATGTAAAG-1_CRC1 | Epithelial cells type5 | 1170 |
| TCTGAGACACGGTAGA-1_CRC1  | Epithelial cells type5 | 1008 |
| GATCGTACAAGCGATG-1_CRC1  | Epithelial cells type5 | 1602 |
| AACACGTCAGACGCTC-1_CRC1  | Epithelial cells type5 | 1419 |
| CGCTGGAAGACTAGAT-1_CRC1  | Epithelial cells type5 | 1289 |
| AGGGATGGTTACAGAA-1_CRC1  | Epithelial cells type5 | 1408 |
| GCGCAGTGTAACGCGA-1_CRC1  | Epithelial cells type5 | 1477 |
| GATGCTAAGATCCCAT-1_CRC1  | Epithelial cells type5 | 1020 |
| ATCACGACAGCTGTGC-1_CRC1  | Epithelial cells type5 | 1039 |
| TGGGAAGCAGTTTACG-1_CRC1  | Epithelial cells type5 | 1098 |
| CAAGGCCAGAGCCTAG-1_CRC1  | Epithelial cells type5 | 1259 |
| GGCGACTTCCTCAATT-1_CRC1  | Epithelial cells type5 | 1168 |
| ATCATCTCAGTTTACG-1_CRC1  | Epithelial cells type5 | 1425 |
| TAAGTGCAGTTAACGA-1_CRC1  | Epithelial cells type5 | 2252 |
| TTGCCGTCACCAGTTA-1_CRC1  | Epithelial cells type5 | 1903 |

|                         |                        |      |
|-------------------------|------------------------|------|
| CATCAGATCAGTACGT-1_CRC1 | Epithelial cells type5 | 1597 |
| GGACAGATCCACGTGG-1_CRC1 | Epithelial cells type5 | 1778 |
| CCTTCGATCTGCCCTA-1_CRC1 | Epithelial cells type5 | 1670 |
| GCTGCAGGTGTAAGTA-1_CRC1 | Epithelial cells type5 | 1700 |
| CGTTGGGCAAGTCTGT-1_CRC1 | Epithelial cells type5 | 1283 |
| TTTCCTCTCATGGTCA-1_CRC1 | Epithelial cells type5 | 1423 |
| ACGTCAATCCTAGAAC-1_CRC1 | Epithelial cells type5 | 1031 |
| TTAGGACAGTTATCGC-1_CRC1 | Epithelial cells type5 | 704  |
| ATCTACTTCAACCATG-1_CRC1 | Epithelial cells type5 | 1135 |
| CGTTCTGCATTACGAC-1_CRC1 | Epithelial cells type5 | 865  |
| ATCACGACAAGTACCT-1_CRC1 | Epithelial cells type5 | 802  |
| GTTACAGCACAGACAG-1_CRC1 | Epithelial cells type5 | 1140 |
| AGTTGGTCACCAGCAC-1_CRC1 | Epithelial cells type5 | 1226 |
| ACTTACTAGAATTCCC-1_CRC1 | Epithelial cells type5 | 1047 |
| TCATTACGTACAGTGG-1_CRC1 | Epithelial cells type5 | 911  |
| CACATAGCAGGCAGTA-1_CRC1 | Epithelial cells type5 | 1482 |
| CCTTCGATCTCGTTTA-1_CRC1 | Epithelial cells type5 | 1473 |
| CAGCATATCTTTACAC-1_CRC1 | Epithelial cells type5 | 763  |
| AACTGGTAGTGCATG-1_CRC1  | Epithelial cells type5 | 791  |
| TAAGCGTTCCGAATGT-1_CRC1 | Epithelial cells type5 | 661  |
| AGGTCATCAATGAATG-1_CRC1 | Epithelial cells type5 | 980  |
| CATCAGAAGTCATCCA-1_CRC1 | Epithelial cells type5 | 982  |
| TCGAGGCCAGACGCAA-1_CRC1 | Epithelial cells type5 | 843  |
| ACTTTCAGTCTGGAGA-1_CRC1 | Epithelial cells type5 | 1091 |
| ACGGGTCGTGTTTGGT-1_CRC1 | Epithelial cells type5 | 1123 |
| GTACGTATCCCTCAGT-1_CRC1 | Epithelial cells type5 | 1003 |
| GTCACGGGTATTACCG-1_CRC1 | Epithelial cells type5 | 1409 |
| TAGAGCTGTGTAAAGA-1_CRC1 | Epithelial cells type5 | 1107 |
| GAAATGAGTGAGCGAT-1_CRC1 | Epithelial cells type5 | 976  |
| TTTACTGTCTTGCCGT-1_CRC1 | Epithelial cells type5 | 1219 |
| AAGACCTTCTAACTGG-1_CRC1 | Epithelial cells type5 | 814  |
| TGCGGGTTCAACGCTA-1_CRC1 | Epithelial cells type5 | 574  |
| CGGACTGAGCTACCGC-1_CRC1 | Epithelial cells type5 | 818  |
| GTGCATAGTCATGCAT-1_CRC1 | Epithelial cells type5 | 1185 |
| AGTTGGTTCCAAGCCG-1_CRC1 | Epithelial cells type5 | 911  |
| CGGCTAGTCCACGAAT-1_CRC1 | Epithelial cells type5 | 576  |
| CTTAGGAAGAAACCGC-1_CRC1 | Epithelial cells type5 | 1267 |
| TTCTTAGAGAACTCGG-1_CRC1 | Epithelial cells type5 | 966  |
| CACCTTGCAATGTTGC-1_CRC1 | Epithelial cells type5 | 1393 |
| CGTCAGGAGTCCGGTC-1_CRC1 | Epithelial cells type5 | 1260 |
| ACAGCTACAAAGGCGT-1_CRC1 | Epithelial cells type5 | 1058 |
| AGATTGCAGACACGAC-1_CRC1 | Epithelial cells type5 | 1081 |
| CTCGGGAGTTTAGGAA-1_CRC1 | Epithelial cells type5 | 1240 |
| AAGACCTGTGCGCACT-1_CRC1 | Epithelial cells type5 | 950  |
| ACTGAGTGTACACCGC-1_CRC1 | Epithelial cells type5 | 809  |
| GCGACCAAGATATGCA-1_CRC1 | Epithelial cells type5 | 743  |
| CGAATGTCACGTAAGG-1_CRC1 | Epithelial cells type5 | 1102 |
| CGAGAAGAGACAGACC-1_CRC1 | Epithelial cells type5 | 1144 |
| CTGCGGAGTACACCGC-1_CRC1 | Epithelial cells type5 | 1148 |
| GCAGCCATCTACCAGA-1_CRC1 | Epithelial cells type5 | 1146 |
| CAGCCGAAGTTCCACA-1_CRC1 | Epithelial cells type5 | 1233 |

|                          |                        |      |
|--------------------------|------------------------|------|
| TGAGCATCATATGGTC-1_CRC1  | Epithelial cells type5 | 1134 |
| ATCATCTGTACAGTGG-1_CRC1  | Epithelial cells type5 | 783  |
| ACAGCCGTCTTACCGC-1_CRC1  | Epithelial cells type5 | 704  |
| TCGGGACTCTCTGCTG-1_CRC1  | Epithelial cells type5 | 631  |
| CCGTACTCAAGCCAC-1_CRC1   | Epithelial cells type5 | 1164 |
| AACTCTTCACCGATAT-1_CRC1  | Epithelial cells type5 | 957  |
| GAACGGATCCCTTGCA-1_CRC1  | Epithelial cells type5 | 999  |
| TTCTTAGGTAACGACG-1_CRC1  | Epithelial cells type5 | 800  |
| GTAAGTGTCCACGTGG-1_CRC1  | Epithelial cells type5 | 1078 |
| TATCTCATCTGCGACG-1_CRC1  | Epithelial cells type5 | 866  |
| ACACCAAAGAGCCTAG-1_CRC1  | Epithelial cells type5 | 617  |
| GCACTCTAGGTTACCT-1_CRC1  | Epithelial cells type5 | 758  |
| TGCGTGGAGAGTGAGA-1_CRC1  | Epithelial cells type5 | 2115 |
| CAGAATCTCTTAGAGC-1_CRC1  | Epithelial cells type5 | 1607 |
| AGGCCGTCATTATCTC-1_CRC1  | Epithelial cells type5 | 1094 |
| AAGGCAGAGCGATCCC-1_CRC1  | Epithelial cells type5 | 1222 |
| CGTGTAAGTAGGGACT-1_CRC1  | Epithelial cells type5 | 1141 |
| TGGCGCAGTTAAGGGC-1_CRC1  | Epithelial cells type5 | 867  |
| GGCTCGACACCTATCC-1_CRC1  | Epithelial cells type5 | 1164 |
| TGCCAAACATAAGACA-1_CRC1  | Epithelial cells type5 | 1529 |
| ACGTCAATCTGCTGCT-1_CRC1  | Epithelial cells type5 | 1628 |
| ATAACGCAGCTGCGAA-1_CRC1  | Epithelial cells type5 | 1442 |
| GAGCAGATCTGTCTAT-1_CRC1  | Epithelial cells type5 | 1066 |
| GGTGAAGAGTGACTCT-1_CRC1  | Epithelial cells type5 | 1161 |
| CAGAGAGTCCTCATTA-1_CRC0  | Epithelial cells type5 | 1727 |
| CATTATCCAACGCACC-1_CRC1  | Epithelial cells type5 | 1823 |
| CCTAAAGCAGTCTTCC-1_CRC2  | Epithelial cells type5 | 3745 |
| AACTCTTAGGGTATCG-1_CRC2  | Epithelial cells type5 | 1661 |
| ACGAGGATCGGAATCT-1_CRC2  | Epithelial cells type5 | 2129 |
| AGTAGTCCATGCTAGT-1_CRC1  | Epithelial cells type5 | 1443 |
| CTACCCACACATAACC-1_CRC1  | Epithelial cells type5 | 961  |
| TTTGCGCAGAAGGACA-1_CRC1  | Epithelial cells type5 | 1442 |
| CCTTCGACAGGGTTAG-1_CRC1  | Epithelial cells type5 | 1014 |
| CGATGTAGTCCGCTGA-1_CRC1  | Epithelial cells type5 | 970  |
| GCAAACCTTCATCGCTC-1_CRC1 | Epithelial cells type5 | 1122 |
| TTTATGCAGTGTTAGA-1_CRC1  | Epithelial cells type5 | 1177 |
| AAGTCTGGTACAGACG-1_CRC1  | Epithelial cells type5 | 918  |
| TGGCGCATCACCCCTCA-1_CRC1 | Epithelial cells type5 | 1015 |
| GCTGGGTTTCAGGCCCA-1_CRC1 | Epithelial cells type5 | 780  |
| GTCGTAAGTCCGTGAC-1_CRC1  | Epithelial cells type5 | 1019 |
| GGCTGGTGTTCACAACA-1_CRC1 | Epithelial cells type5 | 913  |
| CGATTGACACTCTGTC-1_CRC1  | Epithelial cells type5 | 1240 |
| CTAAGACTCACAATGC-1_CRC1  | Epithelial cells type5 | 1040 |
| TCAGGATAGACAAAGG-1_CRC1  | Epithelial cells type5 | 1160 |
| TGGCTGGCACGACGAA-1_CRC1  | Epithelial cells type5 | 1416 |
| CATCCACTCACCGTAA-1_CRC1  | Epithelial cells type5 | 1095 |
| CCTAAAGTCTTACCGC-1_CRC1  | Epithelial cells type5 | 1111 |
| CGGTAAAGACGACGT-1_CRC1   | Epithelial cells type5 | 1385 |
| CAGCCGATCGTTGCCT-1_CRC1  | Epithelial cells type5 | 1040 |
| GTCTCGTTCTCCTATA-1_CRC1  | Epithelial cells type5 | 1494 |
| AGGCCACTCAGTGTTG-1_CRC1  | Epithelial cells type5 | 1648 |



|                         |                        |      |
|-------------------------|------------------------|------|
| AGGTCCGTCAGCTGGC-1_CRC1 | Epithelial cells type5 | 1599 |
| CTCATTACAGACTCGC-1_CRC1 | Epithelial cells type5 | 1308 |
| GGGTCTGTCTCATTCA-1_CRC1 | Epithelial cells type5 | 1446 |
| CCTTACGAGACTGTAA-1_CRC1 | Epithelial cells type5 | 1627 |
| GTGGGTCAGACAAGCC-1_CRC1 | Epithelial cells type5 | 1754 |
| CGACTTCCAAAGTCAA-1_CRC2 | Epithelial cells type6 | 1425 |
| AGCGGTCAGGAGTCTG-1_CRC2 | Epithelial cells type6 | 1253 |
| ACTTGTTGTTGGACCC-1_CRC2 | Epithelial cells type6 | 930  |
| TCGTACCTCGCGATCG-1_CRC2 | Epithelial cells type6 | 1079 |
| CAGAATCCAATCCAAC-1_CRC2 | Epithelial cells type6 | 1754 |
| TCGTAGAAGAAGAAGC-1_CRC2 | Epithelial cells type6 | 1347 |
| CGTCACTGTCTGATTG-1_CRC2 | Epithelial cells type6 | 1861 |
| CGCTTCAAGCTAGTCT-1_CRC2 | Epithelial cells type6 | 1398 |
| CAACCAACACAAGTAA-1_CRC2 | Epithelial cells type6 | 968  |
| CAAGTTGGTCTGCAAT-1_CRC2 | Epithelial cells type6 | 1052 |
| GATGCTAAGATGGCGT-1_CRC2 | Epithelial cells type6 | 525  |
| TACAGTGTCAAGTGTG-1_CRC2 | Epithelial cells type6 | 547  |
| CGGAGTCTCCTCTAGC-1_CRC2 | Epithelial cells type6 | 602  |
| GTCGTAAGTGCAGTAA-1_CRC2 | Epithelial cells type6 | 720  |
| AAAGCAAGTCTAACGT-1_CRC2 | Epithelial cells type6 | 878  |
| ACGGGCTCATACGCTA-1_CRC2 | Epithelial cells type6 | 630  |
| TCTCTAAAGACACTAA-1_CRC2 | Epithelial cells type6 | 710  |
| ACGCCGAGTCGCATCG-1_CRC2 | Epithelial cells type6 | 1037 |
| GTGTTAGTCGTTGACA-1_CRC2 | Epithelial cells type6 | 780  |
| CACAGTAGTACAGTGG-1_CRC2 | Epithelial cells type6 | 717  |
| TGGCCAGAGCACACAG-1_CRC2 | Epithelial cells type6 | 737  |
| CGCTGGATCTCACATT-1_CRC2 | Epithelial cells type6 | 615  |
| CTTAAGTGTCCCGAG-1_CRC2  | Epithelial cells type6 | 698  |
| CGAATGTCACGGATAG-1_CRC2 | Epithelial cells type6 | 633  |
| GGAGCAAGTTCCATGA-1_CRC2 | Epithelial cells type6 | 731  |
| ATCTGCCCAAGCTGTT-1_CRC2 | Epithelial cells type6 | 799  |
| ACGGAGATCCCTGACT-1_CRC2 | Epithelial cells type6 | 487  |
| TCCACACAGCTCTCGG-1_CRC2 | Epithelial cells type6 | 546  |
| ATCCGAAGTCACTTCC-1_CRC2 | Epithelial cells type6 | 847  |
| TCGCGAGCACTTAACG-1_CRC2 | Epithelial cells type6 | 1052 |
| CCTATTAAGTCCATAC-1_CRC2 | Epithelial cells type6 | 665  |
| TTCTCCTTCCACTGGG-1_CRC2 | Epithelial cells type6 | 1075 |
| GTCCTCAAGAACAAC-1_CRC2  | Epithelial cells type6 | 814  |
| ACTGATGCACCGGAAA-1_CRC2 | Epithelial cells type6 | 829  |
| GTCACAAGTAAGCACG-1_CRC2 | Epithelial cells type6 | 708  |
| ATCGAGTCAAGGACTG-1_CRC2 | Epithelial cells type6 | 417  |
| GAAACTCCATACGCTA-1_CRC2 | Epithelial cells type6 | 683  |
| TTAGGACTCTGTTTGT-1_CRC2 | Epithelial cells type6 | 732  |
| GGTGTTACATTAACCG-1_CRC2 | Epithelial cells type6 | 554  |
| CAAGATCTCACCTTAT-1_CRC2 | Epithelial cells type6 | 486  |
| CTACACCGTCTCTCTG-1_CRC2 | Epithelial cells type6 | 475  |
| CCTATTACAGGGATTG-1_CRC2 | Epithelial cells type6 | 1019 |
| TGAGAGGGTGATGTCT-1_CRC2 | Epithelial cells type6 | 794  |
| ACCGTAAAGGCCATAG-1_CRC2 | Epithelial cells type6 | 575  |
| AGGCCGTGTAAAGGAG-1_CRC2 | Epithelial cells type6 | 603  |
| AGTCTTTAGACGCTTT-1_CRC2 | Epithelial cells type6 | 443  |

|                         |                        |      |
|-------------------------|------------------------|------|
| GACGCGTGTCTAGCGC-1_CRC2 | Epithelial cells type6 | 670  |
| CTCCTAGAGCACACAG-1_CRC2 | Epithelial cells type6 | 568  |
| TGTGTTTCACATCTTT-1_CRC2 | Epithelial cells type6 | 370  |
| CGTTAGAGTAGCTAAA-1_CRC2 | Epithelial cells type6 | 682  |
| GACCTGGGTCGCTTCT-1_CRC2 | Epithelial cells type6 | 626  |
| CTGAAGTTCTGAGGGA-1_CRC2 | Epithelial cells type6 | 447  |
| GTTCTCGAGGAGTTTA-1_CRC2 | Epithelial cells type6 | 435  |
| CCACCTATCTGTTTGT-1_CRC2 | Epithelial cells type6 | 546  |
| GAACATCCAATAGAGT-1_CRC2 | Epithelial cells type6 | 494  |
| CAAGATCGTCAACATC-1_CRC2 | Epithelial cells type6 | 578  |
| CGCTTCAAGTTGAGAT-1_CRC2 | Epithelial cells type6 | 261  |
| ATAAGAGCAGCTCCGA-1_CRC2 | Epithelial cells type6 | 792  |
| TTGCCGTGTGTTTGTG-1_CRC2 | Epithelial cells type6 | 744  |
| CTTAGGATCACCTCGT-1_CRC2 | Epithelial cells type6 | 875  |
| CACTCCAGTAAGGGAA-1_CRC2 | Epithelial cells type6 | 780  |
| TCATTTGAGTGAATTG-1_CRC2 | Epithelial cells type6 | 722  |
| TACGGTAGTGGACGAT-1_CRC2 | Epithelial cells type6 | 1759 |
| GAGTCCGTCCAAGTAC-1_CRC2 | Epithelial cells type6 | 923  |
| TTTATGCGTCATCCCT-1_CRC2 | Epithelial cells type6 | 1026 |
| CTGTTTAAGGGCTTCC-1_CRC2 | Epithelial cells type6 | 1009 |
| CCAATCCCCTATCTT-1_CRC2  | Epithelial cells type6 | 851  |
| ATTACTCAGAAACCTA-1_CRC2 | Epithelial cells type6 | 647  |
| CTGTTTAAGGTGTAA-1_CRC2  | Epithelial cells type6 | 1113 |
| ACACCGGGTCTTCGTC-1_CRC2 | Epithelial cells type6 | 976  |
| ATCTACTGTAATCACC-1_CRC2 | Epithelial cells type6 | 622  |
| GTGCTTCTCCTCATTA-1_CRC2 | Epithelial cells type6 | 452  |
| GCTCTGTAGTTAGCGG-1_CRC2 | Epithelial cells type6 | 714  |
| GTACGTAGTTCGCTAA-1_CRC2 | Epithelial cells type6 | 1074 |
| CAGTAACCACTAGTAC-1_CRC2 | Epithelial cells type6 | 922  |
| GGCGTGTAGTCACGCC-1_CRC2 | Epithelial cells type6 | 772  |
| GCGACCATCGTTACGA-1_CRC2 | Epithelial cells type6 | 885  |
| AATCCAGCAAGCCTAT-1_CRC2 | Epithelial cells type6 | 804  |
| CCACTACCATGGTCTA-1_CRC2 | Epithelial cells type6 | 964  |
| GACTACAGTGACAAAT-1_CRC2 | Epithelial cells type6 | 1020 |
| TTGCGTCAGCTGGAAC-1_CRC2 | Epithelial cells type6 | 836  |
| ATGAGGGGTAAAGAAC-1_CRC2 | Epithelial cells type6 | 969  |
| GTTCAATCAAGTTAAG-1_CRC2 | Epithelial cells type6 | 792  |
| GTCAAGTTCAACGGCC-1_CRC2 | Epithelial cells type6 | 1120 |
| CAGCTGGAGTATGACA-1_CRC2 | Epithelial cells type6 | 1091 |
| ACTTACTAGCTGGAAC-1_CRC1 | Epithelial cells type6 | 878  |
| GAGGTGACATGGTTGT-1_CRC1 | Epithelial cells type6 | 856  |
| ACAGCCGCATAAGACA-1_CRC2 | Epithelial cells type6 | 536  |
| CCGTGGAGTACCGAGA-1_CRC2 | Epithelial cells type6 | 429  |
| ACTGAGTAGGACCACA-1_CRC2 | Epithelial cells type6 | 432  |
| CAGAGAGTCCCTCAGT-1_CRC2 | Epithelial cells type6 | 419  |
| GAGGTGATCGGTTCCG-1_CRC2 | Epithelial cells type6 | 437  |
| TGGTTAGGTAACGTTT-1_CRC2 | Epithelial cells type6 | 543  |
| GCTGGGTTTACCATAG-1_CRC2 | Epithelial cells type6 | 413  |
| GATCAGTCATGTTCCC-1_CRC2 | Epithelial cells type6 | 210  |
| GGTGAAGTCGTTACAG-1_CRC2 | Epithelial cells type6 | 283  |
| ACGCAGCAGATATGGT-1_CRC2 | Epithelial cells type6 | 179  |

|                         |                        |      |
|-------------------------|------------------------|------|
| GACGTTAAGGTAAACT-1_CRC2 | Epithelial cells type6 | 534  |
| GTGGGTCGTAAGTTCC-1_CRC2 | Epithelial cells type6 | 234  |
| GTTTCTAAGGCGTACA-1_CRC2 | Epithelial cells type6 | 371  |
| CGTAGCGGTGATGCCC-1_CRC2 | Epithelial cells type6 | 345  |
| CTGTGCTGTCTAGTCA-1_CRC2 | Epithelial cells type6 | 233  |
| TCTCTAAGTCTCCCTA-1_CRC2 | Epithelial cells type6 | 253  |
| GCATGATAGTCACGCC-1_CRC2 | Epithelial cells type6 | 226  |
| TGCTACCCATACAGCT-1_CRC2 | Epithelial cells type6 | 249  |
| GGATGTTTCATCGGAT-1_CRC2 | Epithelial cells type6 | 843  |
| TTCTACACATCGATGT-1_CRC2 | Epithelial cells type6 | 681  |
| CGAATGTAGAGCAATT-1_CRC2 | Epithelial cells type6 | 371  |
| TCATTACAGTCTCCTC-1_CRC2 | Epithelial cells type6 | 351  |
| CTTACCGAGCCGATTT-1_CRC2 | Epithelial cells type6 | 825  |
| GTGCATAAGAAGCCCA-1_CRC2 | Epithelial cells type6 | 675  |
| CAGCAGCGTCCAATA-1_CRC2  | Epithelial cells type6 | 486  |
| CCCTCCTGTCAAAGAT-1_CRC2 | Epithelial cells type6 | 515  |
| TCTCATAGTCTGCCAG-1_CRC2 | Epithelial cells type6 | 488  |
| CATCCACAGTTTCCTT-1_CRC2 | Epithelial cells type6 | 751  |
| CACCACTAGCTGTCTA-1_CRC2 | Epithelial cells type6 | 649  |
| TGAGCCGCAAGTCATC-1_CRC2 | Epithelial cells type6 | 699  |
| ATCGAGTAGTCTTGCA-1_CRC2 | Epithelial cells type6 | 816  |
| AGCATACGTGCGCTTG-1_CRC2 | Epithelial cells type6 | 507  |
| GCATGATTCCAGGGCT-1_CRC2 | Epithelial cells type6 | 515  |
| CCACCTACATTACGAC-1_CRC2 | Epithelial cells type6 | 466  |
| AAGACCTGTTCCACAA-1_CRC2 | Epithelial cells type6 | 301  |
| TTAGGACGTTCGTTGA-1_CRC2 | Epithelial cells type6 | 474  |
| CGGACGTGTTAGATGA-1_CRC2 | Epithelial cells type6 | 552  |
| GTAGGCCGTATAATGG-1_CRC2 | Epithelial cells type6 | 730  |
| CCATTGAGTCGTACT-1_CRC2  | Epithelial cells type6 | 879  |
| CAACCTCCAGGATCGA-1_CRC2 | Epithelial cells type6 | 839  |
| CAAGTTGGTGCCTGCA-1_CRC2 | Epithelial cells type6 | 596  |
| CATGCCTCATCAGTCA-1_CRC2 | Epithelial cells type6 | 472  |
| TCATTTGAGCAGGCTA-1_CRC2 | Epithelial cells type6 | 657  |
| CGTCCATCACTCTGTC-1_CRC2 | Epithelial cells type6 | 640  |
| GAAACTCAGTCTCAAC-1_CRC2 | Epithelial cells type6 | 684  |
| GTAGTCACACACGCTG-1_CRC2 | Epithelial cells type6 | 985  |
| CGAATGTCAGCGTTCG-1_CRC2 | Epithelial cells type6 | 621  |
| CATCGAATCTAACTCT-1_CRC2 | Epithelial cells type6 | 687  |
| CACCACTCAGCCTGTG-1_CRC2 | Epithelial cells type6 | 598  |
| ACCACTCACGGACAA-1_CRC2  | Epithelial cells type6 | 485  |
| CCTATTACATTTCAAG-1_CRC2 | Epithelial cells type6 | 704  |
| GACTACACACGAAATA-1_CRC2 | Epithelial cells type6 | 459  |
| AGCAGCCTCCGCGTTT-1_CRC2 | Epithelial cells type6 | 479  |
| CAGCTGGTCCTAGTGA-1_CRC2 | Epithelial cells type6 | 264  |
| ACACCCTTCAACGGCC-1_CRC2 | Epithelial cells type6 | 1186 |
| AGAGCGATCAAACAAG-1_CRC2 | Epithelial cells type6 | 892  |
| TAAACCGCAGCTCGCA-1_CRC2 | Epithelial cells type6 | 978  |
| CAAGGCCGTCTCCACT-1_CRC2 | Epithelial cells type6 | 991  |
| CAAGATCAGTGTTCGC-1_CRC2 | Epithelial cells type6 | 624  |
| CGCGTTTTCTGCCAGG-1_CRC2 | Epithelial cells type6 | 799  |
| TGCTGCTTCACCATAG-1_CRC2 | Epithelial cells type6 | 817  |

|                          |                        |      |
|--------------------------|------------------------|------|
| ACGGGTCTCATTATCC-1_CRC2  | Epithelial cells type6 | 1061 |
| ATGAGGGGTACCCAAT-1_CRC2  | Epithelial cells type6 | 590  |
| TCTGGAACAGTGGAGT-1_CRC2  | Epithelial cells type6 | 906  |
| TGAGCATCATCTCGCT-1_CRC2  | Epithelial cells type6 | 848  |
| CAGCGACGTCCAAGTT-1_CRC2  | Epithelial cells type6 | 871  |
| GCATACAAGCGTGTCC-1_CRC2  | Epithelial cells type6 | 706  |
| TCGGTAAGTTCGAATC-1_CRC2  | Epithelial cells type6 | 739  |
| CACATTTGTGGAAAGA-1_CRC2  | Epithelial cells type6 | 1087 |
| ACGCCAGGTGCTGTAT-1_CRC2  | Epithelial cells type6 | 763  |
| CCTTCCCGTATTCGTG-1_CRC2  | Epithelial cells type6 | 812  |
| AGCGGTCTCGAACGGA-1_CRC2  | Epithelial cells type6 | 1862 |
| TGGGCGTGTCAAACCTC-1_CRC2 | Epithelial cells type6 | 1381 |
| GTACGTAAGCTGCAAG-1_CRC2  | Epithelial cells type6 | 637  |
| ACTTGTTCAAAGGTGC-1_CRC2  | Epithelial cells type6 | 900  |
| CACCACTCAGTGGAGT-1_CRC2  | Epithelial cells type6 | 660  |
| CTGTTTACAAGAAAGG-1_CRC2  | Epithelial cells type6 | 1115 |
| AGTTGGTGTACCGCTG-1_CRC2  | Epithelial cells type6 | 720  |
| CACATAGAGTAAGTAC-1_CRC2  | Epithelial cells type6 | 290  |
| CCGGGATAGTGAAGTT-1_CRC2  | Epithelial cells type6 | 632  |
| CCACCTACAATGTAAG-1_CRC2  | Epithelial cells type6 | 529  |
| CCTACCAAGCACACAG-1_CRC2  | Epithelial cells type6 | 376  |
| CAGAGAGCAAGGTGTG-1_CRC2  | Epithelial cells type6 | 591  |
| CACCACTAGATGTGGC-1_CRC2  | Epithelial cells type6 | 564  |
| ATTACTCCACAGTCGC-1_CRC2  | Epithelial cells type6 | 460  |
| CTGAAGTTCAAACCGT-1_CRC2  | Epithelial cells type6 | 472  |
| AACTGGTTCTACCTGC-1_CRC2  | Epithelial cells type6 | 537  |
| AAGGCAGTCGCTGATA-1_CRC2  | Epithelial cells type6 | 454  |
| CGATCGGCAGATAATG-1_CRC2  | Epithelial cells type6 | 457  |
| ACCGTAAGTAGAAGGA-1_CRC2  | Epithelial cells type6 | 269  |
| TACGGATGTCTAGGTT-1_CRC2  | Epithelial cells type6 | 328  |
| ACGATACAGGCCCGTT-1_CRC2  | Epithelial cells type6 | 436  |
| ATGAGGGCAACTGCTA-1_CRC2  | Epithelial cells type6 | 419  |
| TAGCCGGTCTTAACCT-1_CRC2  | Epithelial cells type6 | 453  |
| TGACTAGCATTCACTT-1_CRC2  | Epithelial cells type6 | 576  |
| GTTCATTAGCGTCAAG-1_CRC2  | Epithelial cells type6 | 582  |
| GTTTCGGGAGGGCACTA-1_CRC2 | Epithelial cells type6 | 615  |
| TCAACGACAACACCTA-1_CRC2  | Epithelial cells type6 | 732  |
| GTGGGTTCGTAGCGTGA-1_CRC2 | Epithelial cells type6 | 393  |
| TAAACCGCATTCCCTGC-1_CRC2 | Epithelial cells type6 | 455  |
| AGCGGTCTCCTTCAAT-1_CRC2  | Epithelial cells type6 | 662  |
| AAGTCTGAGACCGGAT-1_CRC2  | Epithelial cells type6 | 648  |
| ATTGGTGGTGTTCGAT-1_CRC2  | Epithelial cells type6 | 606  |
| CGATTGATCGGACAAG-1_CRC2  | Epithelial cells type6 | 590  |
| GTTTCTATCATCACCC-1_CRC2  | Epithelial cells type6 | 594  |
| CAGCGACGTAGCAAAT-1_CRC2  | Epithelial cells type6 | 556  |
| CTAATGGGTCAAAGCG-1_CRC2  | Epithelial cells type6 | 391  |
| GGGCACTCAAAGAATC-1_CRC2  | Epithelial cells type6 | 692  |
| CACCACTTCTGCGACG-1_CRC2  | Epithelial cells type6 | 653  |
| AAGCCGCCAGTCGATT-1_CRC2  | Epithelial cells type6 | 777  |
| CAACTAGCACCATCCT-1_CRC2  | Epithelial cells type6 | 790  |
| AAGGAGCGTGGCAAAC-1_CRC2  | Epithelial cells type6 | 1299 |

|                          |                        |      |
|--------------------------|------------------------|------|
| TATTACCCAGGTGGAT-1_CRC2  | Epithelial cells type6 | 1039 |
| TAGAGCTTCACCAGGC-1_CRC2  | Epithelial cells type6 | 890  |
| GTGCATAGTTCGAATC-1_CRC2  | Epithelial cells type6 | 863  |
| AAACGGGCATGCCTAA-1_CRC2  | Epithelial cells type6 | 769  |
| CCACCTAGTAGCTAAA-1_CRC2  | Epithelial cells type6 | 709  |
| CCAATCCGTACCAGTT-1_CRC2  | Epithelial cells type6 | 636  |
| CTCTACGTCTGAAAGA-1_CRC2  | Epithelial cells type6 | 377  |
| GGAGCAAGTCGTCTTC-1_CRC2  | Epithelial cells type6 | 651  |
| GTCTCGTCAGTAAGCG-1_CRC2  | Epithelial cells type6 | 972  |
| CAAGTTGCAAAGGTGC-1_CRC2  | Epithelial cells type6 | 835  |
| GCCAAATTCCTAGAAC-1_CRC2  | Epithelial cells type6 | 550  |
| ACATACGGTTTGGGCC-1_CRC2  | Epithelial cells type6 | 563  |
| GCCAAATAGCGTCAAG-1_CRC2  | Epithelial cells type6 | 702  |
| CGAACATCACTTCGAA-1_CRC2  | Epithelial cells type6 | 854  |
| GTGGGTCCAGATCCAT-1_CRC2  | Epithelial cells type6 | 902  |
| TGCGTGGGTACGCACC-1_CRC2  | Epithelial cells type6 | 608  |
| CGCTTCAAGTCAAGGC-1_CRC2  | Epithelial cells type6 | 475  |
| CTTAGGAGTCGGCTCA-1_CRC2  | Epithelial cells type6 | 479  |
| GATCAGTCACAAGCCC-1_CRC2  | Epithelial cells type6 | 751  |
| CAAGATCCATTATCTC-1_CRC2  | Epithelial cells type6 | 450  |
| TCGGGACAGTGGGATC-1_CRC2  | Epithelial cells type6 | 418  |
| CGAATGTCATGGTAGG-1_CRC2  | Epithelial cells type6 | 384  |
| CTGGTCTTCGTACCGG-1_CRC2  | Epithelial cells type6 | 451  |
| ACGCCGATCCTTGCCA-1_CRC2  | Epithelial cells type6 | 326  |
| GACGTTATCAATACCG-1_CRC2  | Epithelial cells type6 | 367  |
| GTACTTTTCTTGACGA-1_CRC0  | Epithelial cells type6 | 1591 |
| TAGACCAGTACGACCC-1_CRC0  | Epithelial cells type6 | 1978 |
| GCGACCATCCACTCCA-1_CRC0  | Epithelial cells type6 | 1400 |
| TCTTTCCTCTGTACGA-1_CRC0  | Epithelial cells type6 | 1664 |
| AACTTTCAGAGCTTCT-1_CRC2  | Epithelial cells type6 | 543  |
| GATGAGGTCATGGTCA-1_CRC2  | Epithelial cells type6 | 692  |
| ACGGGTCCACCAGGTC-1_CRC2  | Epithelial cells type6 | 494  |
| CAGGTGCGTGAAATCA-1_CRC2  | Epithelial cells type6 | 492  |
| GGAATAATCTCTGAGA-1_CRC2  | Epithelial cells type6 | 273  |
| CGTCTACAGACAAGCC-1_CRC2  | Epithelial cells type6 | 201  |
| GGAACCTTTCGATCCCT-1_CRC2 | Epithelial cells type6 | 218  |
| CTCGAAATCGTGGGAA-1_CRC1  | Epithelial cells type6 | 428  |
| CATATGGCATGTAAGA-1_CRC2  | Epithelial cells type6 | 466  |
| ACATCAGGTTATGTGC-1_CRC2  | Epithelial cells type6 | 320  |
| CAGAATCAGTACGTAA-1_CRC2  | Epithelial cells type6 | 292  |
| TAGAGCTGTTACGACT-1_CRC2  | Epithelial cells type6 | 177  |
| TACGGATAGCCAGAAC-1_CRC2  | Epithelial cells type6 | 298  |
| TCGGGACCAAACGTGG-1_CRC2  | Epithelial cells type6 | 196  |
| AACCATGCATAGGATA-1_CRC2  | Epithelial cells type6 | 259  |
| CAGCCGAAGCAGGCTA-1_CRC2  | Epithelial cells type6 | 274  |
| GAACATCCAGGGTATG-1_CRC2  | Epithelial cells type6 | 137  |
| TCGCGTTGTTCGGCAC-1_CRC2  | Epithelial cells type6 | 315  |
| GATCGATCAATGTAAG-1_CRC2  | Epithelial cells type6 | 609  |
| GTCTTCGGTGCAACGA-1_CRC2  | Epithelial cells type6 | 285  |
| TACCTATCAGCAGTTT-1_CRC2  | Epithelial cells type6 | 227  |
| GACGGCTTCACGCGGT-1_CRC2  | Epithelial cells type6 | 423  |

|                          |                        |      |
|--------------------------|------------------------|------|
| ATGTGTGAGCCTTGAT-1_CRC2  | Epithelial cells type6 | 182  |
| TGCGTGGGTACAGCAG-1_CRC2  | Epithelial cells type6 | 120  |
| GGGATGACAGCATGAG-1_CRC2  | Epithelial cells type6 | 223  |
| ACTGTCCGTTCCAACA-1_CRC2  | Epithelial cells type6 | 186  |
| GGGTCTGGTAAGAGAG-1_CRC2  | Epithelial cells type6 | 339  |
| CGTAGGCTCTGTCTAT-1_CRC2  | Epithelial cells type6 | 214  |
| GGCTGGTGTCCAAGTT-1_CRC2  | Epithelial cells type6 | 292  |
| TTTACTGGTGCCTTG-1_CRC2   | Epithelial cells type6 | 187  |
| GCTGCAGGTTCTGTCTC-1_CRC2 | Epithelial cells type6 | 299  |
| TTCGAAGGTTCTCCA-1_CRC2   | Epithelial cells type6 | 225  |
| ATCATGGTCTGCCAGG-1_CRC2  | Epithelial cells type6 | 204  |
| TCAGCAAGTTCCTCCA-1_CRC2  | Epithelial cells type6 | 342  |
| TTATGCTTCATAGCAC-1_CRC2  | Epithelial cells type6 | 349  |
| TGGCCAGAGACTGGGT-1_CRC2  | Epithelial cells type6 | 1102 |
| CACACTCCACATCCGG-1_CRC2  | Epithelial cells type6 | 377  |
| AGACGTTTCAGCAACT-1_CRC2  | Epithelial cells type6 | 447  |
| CTCGAGGCAGGATCGA-1_CRC2  | Epithelial cells type6 | 236  |
| GGAGCAACAGTAAGCG-1_CRC2  | Epithelial cells type6 | 225  |
| TCGCGAGCAAGAAAGG-1_CRC2  | Epithelial cells type6 | 205  |
| CGTCCATAGCACCGTC-1_CRC2  | Epithelial cells type6 | 797  |
| CGGACGTGTATCACCA-1_CRC2  | Epithelial cells type6 | 450  |
| CTGCCTAGTTAAGACA-1_CRC2  | Epithelial cells type6 | 541  |
| TAGACCAAGTGTACTC-1_CRC2  | Epithelial cells type6 | 425  |
| CCCAATCGTCTAAAGA-1_CRC2  | Epithelial cells type6 | 207  |
| ATCTACTGTACCGCTG-1_CRC2  | Epithelial cells type6 | 132  |
| GCTGCGATCATAAAGG-1_CRC2  | Epithelial cells type6 | 346  |
| CACACTCGTTTGTGG-1_CRC2   | Epithelial cells type6 | 609  |
| CCAATCCCAAGCGTAG-1_CRC2  | Epithelial cells type6 | 443  |
| CGATTGAAGACTACAA-1_CRC2  | Epithelial cells type6 | 950  |
| CACAACTCCTCCTAG-1_CRC2   | Epithelial cells type6 | 523  |
| TGAGCCGAGTGGTAGC-1_CRC2  | Epithelial cells type6 | 485  |
| GGCTCGATCCTGCAGG-1_CRC2  | Epithelial cells type6 | 365  |
| AAAGCAAGTCCATCCT-1_CRC2  | Epithelial cells type6 | 371  |
| CAACCAATCGCCATAA-1_CRC2  | Epithelial cells type6 | 457  |
| GTTAAGCAGTAGGTGC-1_CRC2  | Epithelial cells type6 | 806  |
| AGATCTGGTAGCGTGA-1_CRC2  | Epithelial cells type6 | 294  |
| AGATTGCCACGGTAGA-1_CRC2  | Epithelial cells type6 | 249  |
| GCATGTAAGGGAAACA-1_CRC2  | Epithelial cells type6 | 318  |
| ACATACGCACAGCCCA-1_CRC2  | Epithelial cells type6 | 400  |
| TTTATGCCAATCCAAC-1_CRC2  | Epithelial cells type6 | 316  |
| CGCGGTACAGCTATTG-1_CRC2  | Epithelial cells type6 | 876  |
| TAAACCGTCGAAGTGT-1_CRC2  | Epithelial cells type6 | 404  |
| AGGGAGTGTGCGATCG-1_CRC2  | Epithelial cells type6 | 559  |
| GGGAATGGTTTGGCGC-1_CRC2  | Epithelial cells type6 | 553  |
| ACTGAGTCAAGTAGTA-1_CRC2  | Epithelial cells type6 | 475  |
| TCGGGACTCGGCTTGG-1_CRC2  | Epithelial cells type6 | 442  |
| TCTATTGTCTCGCATC-1_CRC2  | Epithelial cells type6 | 273  |
| TTAGGACGTACTTCTT-1_CRC2  | Epithelial cells type6 | 315  |
| TGCCCTAAGCCACCTG-1_CRC2  | Epithelial cells type6 | 393  |
| CTAATGGCAACGATGG-1_CRC2  | Epithelial cells type6 | 318  |
| TGCCCATTGCGAAACG-1_CRC2  | Epithelial cells type6 | 530  |

|                          |                        |      |
|--------------------------|------------------------|------|
| GACTGCGCAGCCTTTC-1_CRC2  | Epithelial cells type6 | 308  |
| TCGGTAATCCTTGCTC-1_CRC2  | Epithelial cells type6 | 143  |
| ATTGGACCATGGTCTA-1_CRC2  | Epithelial cells type6 | 29   |
| GTTTCTAAGATAGTCA-1_CRC2  | Epithelial cells type6 | 225  |
| TTTGTCAGTCGTCTTC-1_CRC2  | Epithelial cells type6 | 151  |
| TTTACTGTGCGAGCAA-1_CRC2  | Epithelial cells type6 | 360  |
| GACAGAGAGGGATACC-1_CRC2  | Epithelial cells type6 | 174  |
| TTTGCGCCAAAGTGCG-1_CRC2  | Epithelial cells type6 | 257  |
| GGAATAACAATGACCT-1_CRC2  | Epithelial cells type6 | 610  |
| TCTATTGCAGGCTGAA-1_CRC2  | Epithelial cells type6 | 250  |
| TACCTATTCCACTGGG-1_CRC2  | Epithelial cells type6 | 561  |
| TACTTACGTCCAAGTT-1_CRC2  | Epithelial cells type6 | 407  |
| ACCAGTAAGATACACA-1_CRC2  | Epithelial cells type6 | 292  |
| AGAGCTTAGATACACA-1_CRC2  | Epithelial cells type6 | 131  |
| CAGCGACCAACACGCC-1_CRC2  | Epithelial cells type6 | 652  |
| GGGCATCCAAGCCATT-1_CRC2  | Epithelial cells type6 | 524  |
| TAGACCATCCTAGTGA-1_CRC2  | Epithelial cells type6 | 389  |
| CACTCCATCTACTATC-1_CRC2  | Epithelial cells type6 | 445  |
| TAAACCGAGATATGGT-1_CRC2  | Epithelial cells type6 | 298  |
| CTGAAGTTCTATGTGG-1_CRC2  | Epithelial cells type6 | 446  |
| AACCGCGCAAAGTGT-1_CRC2   | Epithelial cells type6 | 131  |
| TACGGTACATGGTCTA-1_CRC2  | Epithelial cells type6 | 299  |
| CAAGTTGTCTTTACGT-1_CRC2  | Epithelial cells type6 | 478  |
| TGAAAGAGTAGCGCTC-1_CRC2  | Epithelial cells type6 | 628  |
| AGACGTTAGTCGCCGT-1_CRC2  | Epithelial cells type6 | 426  |
| CGCGTTTGTGCACTTA-1_CRC2  | Epithelial cells type6 | 507  |
| ATCCGAAGTTCTGAAC-1_CRC2  | Epithelial cells type6 | 2011 |
| CCACGGACACCGAATT-1_CRC2  | Epithelial cells type6 | 785  |
| CAGCGACCAGCATACT-1_CRC2  | Epithelial cells type6 | 1143 |
| TGGTTAGAGCACCGCT-1_CRC2  | Epithelial cells type6 | 1375 |
| CCACCTATCAACGGGA-1_CRC2  | Epithelial cells type6 | 1091 |
| AACTCAGGTCCGAGTC-1_CRC2  | Epithelial cells type6 | 990  |
| CACCTTGACAAAGACG-1_CRC2  | Epithelial cells type6 | 1302 |
| TACTTGTTTCAGGCAAG-1_CRC2 | Epithelial cells type6 | 980  |
| AACGTTGTCATAGCAC-1_CRC2  | Epithelial cells type6 | 776  |
| GGACATTCAAGAAGAG-1_CRC2  | Epithelial cells type6 | 1048 |
| CTCTGGTGTGCCTTGG-1_CRC2  | Epithelial cells type6 | 243  |
| CAACCTCAGAGACTTA-1_CRC2  | Epithelial cells type6 | 478  |
| CTCAGAAAGATATGCA-1_CRC2  | Epithelial cells type6 | 250  |
| GAATGAAAGTCTCAAC-1_CRC2  | Epithelial cells type6 | 272  |
| ACACCAAGTACACCGC-1_CRC2  | Epithelial cells type6 | 365  |
| GGGTTGCGTCCGAATT-1_CRC2  | Epithelial cells type6 | 396  |
| AACCATGAGTGCGTGA-1_CRC2  | Epithelial cells type6 | 764  |
| GATCTAGGTAGGGACT-1_CRC2  | Epithelial cells type6 | 394  |
| ACGGCCACACGCATCG-1_CRC2  | Epithelial cells type6 | 441  |
| GTGAAGGCAATGGAAT-1_CRC2  | Epithelial cells type6 | 471  |
| CTCATTACACGTTGGC-1_CRC2  | Epithelial cells type6 | 485  |
| GTAGGCCTCCCTCTTT-1_CRC2  | Epithelial cells type6 | 448  |
| ATCACGAAGCTAAGAT-1_CRC2  | Epithelial cells type6 | 280  |
| ACACCAACAGCCACCA-1_CRC2  | Epithelial cells type6 | 417  |
| TTTGTCATCTCGAGTA-1_CRC2  | Epithelial cells type6 | 418  |

|                          |                        |      |
|--------------------------|------------------------|------|
| CTGATCCCACCTATCC-1_CRC2  | Epithelial cells type6 | 355  |
| GGAAC TTGTTAAGTAG-1_CRC2 | Epithelial cells type6 | 416  |
| GTCATTTGTCGCGTGT-1_CRC2  | Epithelial cells type6 | 642  |
| ACTGATGAGGCTAGGT-1_CRC2  | Epithelial cells type6 | 397  |
| CAGTAACAGGAGCGAG-1_CRC2  | Epithelial cells type6 | 528  |
| AATCCAGAGTGGAGAA-1_CRC2  | Epithelial cells type6 | 622  |
| CGTCTACGTGTGAAAT-1_CRC2  | Epithelial cells type6 | 440  |
| TTCTACAAGATGTCGG-1_CRC2  | Epithelial cells type6 | 383  |
| GGGCATCCAGGAATGC-1_CRC2  | Epithelial cells type6 | 501  |
| GACGCGTGTACGACCC-1_CRC2  | Epithelial cells type6 | 827  |
| ACTGATGAGTCATCCA-1_CRC2  | Epithelial cells type6 | 479  |
| GTTTCATTAGAGTTGGC-1_CRC2 | Epithelial cells type6 | 587  |
| CATTCGCTCATGTCTT-1_CRC2  | Epithelial cells type6 | 1612 |
| CGAGCACAGGTAAACT-1_CRC2  | Epithelial cells type6 | 823  |
| ATAGACCTCAGTCAGT-1_CRC2  | Epithelial cells type6 | 607  |
| CGCGTTTAGACAGAGA-1_CRC2  | Epithelial cells type6 | 978  |
| TCGGGACGTTTCGCGAC-1_CRC2 | Epithelial cells type6 | 902  |
| CACATAGAGTGTTAGA-1_CRC2  | Epithelial cells type6 | 599  |
| TGAGCATAGGTGCTTT-1_CRC2  | Epithelial cells type6 | 729  |
| ACACCAAGTCATATGC-1_CRC2  | Epithelial cells type6 | 789  |
| GACTGCGAGCACGCCT-1_CRC2  | Epithelial cells type6 | 521  |
| AGAGTGGCATGCCCGA-1_CRC2  | Epithelial cells type6 | 877  |
| CCATGTCCATGGGAAC-1_CRC2  | Epithelial cells type6 | 508  |
| TGTTCCGTCTCGTTTA-1_CRC2  | Epithelial cells type6 | 811  |
| CCGGGATAGTGGAGAA-1_CRC2  | Epithelial cells type6 | 1056 |
| AGTTGGTCACATGACT-1_CRC2  | Epithelial cells type6 | 753  |
| GACACGCTCCAAGTAC-1_CRC2  | Epithelial cells type6 | 504  |
