# Supplementary material for: Single-Cell RNA Sequencing Reveals the Role of Epithelial Cell Marker Genes in Predicting the Prognosis of Colorectal Cancer Patients
Source: Hindawi journal article supplement (doi:10.1155/2022/8347125), 2022-08-01
Supplement: f2 [file 8347125.f2.zip]

**TableS1** Clinical characteristics of four CRC patients in this study

| <b>Patient</b>       | <b>CRC1</b> | <b>CRC2</b> | <b>CRC3</b> | <b>CRC4</b> |
|----------------------|-------------|-------------|-------------|-------------|
| <b>Age</b>           | 46          | 61          | 64          | 53          |
| <b>Gender</b>        | Female      | Male        | Male        | Female      |
| <b>Site of tumor</b> | Colon       | Colon       | Rectum      | Colon       |
| <b>pTNM</b>          | pT3pN0      | pT3pN1b     | pT4apN0     | pT3pN0      |
| <b>Stage</b>         | IIA         | IIIB        | IIIB        | IIA         |
| <b>Grade</b>         | G2-G3       | G2-G3       | G2          | G2-G3       |
