# Supplementary material for: Single-Cell RNA Sequencing Reveals the Role of Epithelial Cell Marker Genes in Predicting the Prognosis of Colorectal Cancer Patients
Source: Hindawi journal article supplement (doi:10.1155/2022/8347125), 2022-08-01
Supplement: f2 [file 8347125.f2.zip]

**TableS3** MEC subclusters marker genes

| gene     | p_val     | avg_log2FC  | pct.1 | pct.2 | fdr       | cluster | Epithelial cell type |
|----------|-----------|-------------|-------|-------|-----------|---------|----------------------|
| LEFTY1   | 0         | 1.979067087 | 0.713 | 0.119 | 0         | 0       | 1                    |
| TACSTD2  | 0         | 1.97479066  | 0.739 | 0.078 | 0         | 0       | 1                    |
| OLFM4    | 0         | 1.966423716 | 0.88  | 0.227 | 0         | 0       | 1                    |
| IFITM3   | 0         | 1.872314207 | 0.882 | 0.324 | 0         | 0       | 1                    |
| LCN2     | 0         | 1.786094489 | 0.79  | 0.181 | 0         | 0       | 1                    |
| MT1E     | 0         | 1.747966621 | 0.743 | 0.139 | 0         | 0       | 1                    |
| SMIM22   | 0         | 1.726396352 | 0.923 | 0.31  | 0         | 0       | 1                    |
| TSPAN8   | 0         | 1.670541211 | 0.947 | 0.339 | 0         | 0       | 1                    |
| S100P    | 0         | 1.649633037 | 0.779 | 0.166 | 0         | 0       | 1                    |
| CEACAM5  | 0         | 1.61692211  | 0.877 | 0.226 | 0         | 0       | 1                    |
| PIGR     | 0         | 1.608086524 | 0.848 | 0.255 | 0         | 0       | 1                    |
| ATP1B1   | 0         | 1.528015307 | 0.904 | 0.306 | 0         | 0       | 1                    |
| TMEM141  | 0         | 1.521926782 | 0.873 | 0.341 | 0         | 0       | 1                    |
| KRT18    | 0         | 1.512966764 | 0.95  | 0.418 | 0         | 0       | 1                    |
| S100A11  | 0         | 1.507094314 | 0.97  | 0.665 | 0         | 0       | 1                    |
| AREG     | 0         | 1.479826204 | 0.793 | 0.25  | 0         | 0       | 1                    |
| IFITM1   | 0         | 1.427289414 | 0.83  | 0.346 | 0         | 0       | 1                    |
| MT-ATP6  | 0         | 1.359829063 | 0.996 | 0.985 | 0         | 0       | 1                    |
| PRDX5    | 0         | 1.357767992 | 0.937 | 0.61  | 0         | 0       | 1                    |
| UQCRH    | 0         | 1.312470716 | 0.944 | 0.66  | 0         | 0       | 1                    |
| NQO1     | 0         | 1.293719735 | 0.736 | 0.186 | 0         | 0       | 1                    |
| PPDPF    | 0         | 1.285673896 | 0.966 | 0.672 | 0         | 0       | 1                    |
| TXN      | 0         | 1.28384061  | 0.947 | 0.563 | 0         | 0       | 1                    |
| TSPAN1   | 0         | 1.281711607 | 0.752 | 0.183 | 0         | 0       | 1                    |
| CEACAM6  | 0         | 1.275863839 | 0.614 | 0.127 | 0         | 0       | 1                    |
| NBL1     | 0         | 1.274264316 | 0.83  | 0.249 | 0         | 0       | 1                    |
| C19orf33 | 0         | 1.270335705 | 0.822 | 0.22  | 0         | 0       | 1                    |
| TNFRSF12 | 0         | 1.264858348 | 0.654 | 0.151 | 0         | 0       | 1                    |
| UQCRQ    | 0         | 1.258991996 | 0.948 | 0.594 | 0         | 0       | 1                    |
| CD24     | 0         | 1.248403201 | 0.939 | 0.398 | 0         | 0       | 1                    |
| ATP5MD   | 0         | 1.239143132 | 0.946 | 0.644 | 0         | 0       | 1                    |
| MT-CO2   | 0         | 1.238309061 | 0.998 | 0.992 | 0         | 0       | 1                    |
| CA9      | 0         | 1.236290859 | 0.597 | 0.105 | 0         | 0       | 1                    |
| ELOB     | 0         | 1.222227076 | 0.963 | 0.714 | 0         | 0       | 1                    |
| SPINT2   | 0         | 1.219812371 | 0.934 | 0.417 | 0         | 0       | 1                    |
| CSTB     | 0         | 1.215948137 | 0.943 | 0.537 | 0         | 0       | 1                    |
| PLA2G16  | 0         | 1.215190595 | 0.729 | 0.217 | 0         | 0       | 1                    |
| AGR3     | 0         | 1.205093309 | 0.781 | 0.182 | 0         | 0       | 1                    |
| MT1M     | 0         | 1.198492026 | 0.518 | 0.046 | 0         | 0       | 1                    |
| GSTP1    | 1.07E-298 | 1.184360866 | 0.95  | 0.645 | 2.08E-294 | 0       | 1                    |
| IFI27    | 0         | 1.178575462 | 0.937 | 0.388 | 0         | 0       | 1                    |
| SOD1     | 3.51E-275 | 1.178450607 | 0.918 | 0.608 | 6.80E-271 | 0       | 1                    |
| SLC12A2  | 0         | 1.171135744 | 0.876 | 0.282 | 0         | 0       | 1                    |
| MT-ND3   | 0         | 1.168180708 | 0.993 | 0.981 | 0         | 0       | 1                    |
| MLEC     | 4.99E-288 | 1.151886161 | 0.861 | 0.388 | 9.68E-284 | 0       | 1                    |
| DSTN     | 9.31E-306 | 1.138288596 | 0.926 | 0.463 | 1.81E-301 | 0       | 1                    |
| EPCAM    | 2.78E-293 | 1.134750406 | 0.951 | 0.388 | 5.40E-289 | 0       | 1                    |
| TESC     | 0         | 1.134454137 | 0.58  | 0.083 | 0         | 0       | 1                    |

|          |           |             |       |       |           |   |   |
|----------|-----------|-------------|-------|-------|-----------|---|---|
| MT-ND1   | 0         | 1.131197501 | 0.993 | 0.959 | 0         | 0 | 1 |
| PPA1     | 1.38E-293 | 1.129256562 | 0.909 | 0.458 | 2.68E-289 | 0 | 1 |
| PDZK1IP1 | 0         | 1.123742146 | 0.665 | 0.142 | 0         | 0 | 1 |
| TMEM123  | 3.78E-226 | 1.112299872 | 0.908 | 0.515 | 7.33E-222 | 0 | 1 |
| AQP5     | 0         | 1.097972271 | 0.478 | 0.034 | 0         | 0 | 1 |
| CYSTM1   | 0         | 1.095210942 | 0.881 | 0.336 | 0         | 0 | 1 |
| S100A6   | 5.33E-258 | 1.072127113 | 0.985 | 0.834 | 1.03E-253 | 0 | 1 |
| MINOS1   | 4.57E-252 | 1.071787831 | 0.912 | 0.536 | 8.86E-248 | 0 | 1 |
| ST14     | 0         | 1.062487337 | 0.804 | 0.258 | 0         | 0 | 1 |
| FXYD3    | 4.74E-302 | 1.050257473 | 0.925 | 0.383 | 9.19E-298 | 0 | 1 |
| MT-CYB   | 0         | 1.045905788 | 0.997 | 0.981 | 0         | 0 | 1 |
| TGFBI    | 0         | 1.045700407 | 0.758 | 0.227 | 0         | 0 | 1 |
| REXO2    | 0         | 1.030498433 | 0.77  | 0.269 | 0         | 0 | 1 |
| S100A10  | 1.72E-271 | 1.029286318 | 0.974 | 0.658 | 3.34E-267 | 0 | 1 |
| EPB41L2  | 0         | 1.023395635 | 0.686 | 0.156 | 0         | 0 | 1 |
| PERP     | 1.04E-289 | 1.020056314 | 0.883 | 0.341 | 2.02E-285 | 0 | 1 |
| MT-CO3   | 0         | 1.014009258 | 0.999 | 0.993 | 0         | 0 | 1 |
| RAC1     | 2.82E-259 | 1.012535477 | 0.953 | 0.6   | 5.48E-255 | 0 | 1 |
| CD151    | 5.24E-275 | 0.990268757 | 0.807 | 0.313 | 1.02E-270 | 0 | 1 |
| TMSB10   | 2.41E-293 | 0.981870893 | 0.997 | 0.983 | 4.67E-289 | 0 | 1 |
| PCBD1    | 4.94E-299 | 0.981641895 | 0.809 | 0.299 | 9.59E-295 | 0 | 1 |
| ADIRF    | 4.11E-234 | 0.974150373 | 0.497 | 0.123 | 7.97E-230 | 0 | 1 |
| KRT8     | 1.95E-245 | 0.972749687 | 0.951 | 0.451 | 3.79E-241 | 0 | 1 |
| RAB25    | 0         | 0.965909904 | 0.763 | 0.236 | 0         | 0 | 1 |
| ATP5IF1  | 5.49E-200 | 0.962142235 | 0.886 | 0.53  | 1.06E-195 | 0 | 1 |
| GPRC5A   | 0         | 0.959100592 | 0.645 | 0.156 | 0         | 0 | 1 |
| HSPE1    | 8.41E-226 | 0.958262945 | 0.928 | 0.596 | 1.63E-221 | 0 | 1 |
| ALDH2    | 4.72E-273 | 0.957027836 | 0.755 | 0.272 | 9.15E-269 | 0 | 1 |
| HSPB1    | 1.24E-180 | 0.956481702 | 0.874 | 0.454 | 2.40E-176 | 0 | 1 |
| GPR160   | 0         | 0.948805697 | 0.707 | 0.219 | 0         | 0 | 1 |
| NPDC1    | 0         | 0.947476149 | 0.747 | 0.202 | 0         | 0 | 1 |
| PHLDA2   | 3.71E-255 | 0.946727556 | 0.718 | 0.244 | 7.19E-251 | 0 | 1 |
| ELF3     | 6.32E-264 | 0.946144412 | 0.929 | 0.368 | 1.23E-259 | 0 | 1 |
| HIST1H4C | 1.18E-126 | 0.945618185 | 0.729 | 0.386 | 2.29E-122 | 0 | 1 |
| ANXA3    | 0         | 0.943298656 | 0.623 | 0.153 | 0         | 0 | 1 |
| EIF1AX   | 3.37E-227 | 0.941279367 | 0.877 | 0.482 | 6.53E-223 | 0 | 1 |
| FHL2     | 0         | 0.939498254 | 0.675 | 0.181 | 0         | 0 | 1 |
| CLDN3    | 1.27E-269 | 0.929861232 | 0.898 | 0.337 | 2.46E-265 | 0 | 1 |
| NDUFC2   | 9.91E-212 | 0.924905636 | 0.877 | 0.483 | 1.92E-207 | 0 | 1 |
| QTRT1    | 1.80E-278 | 0.924301259 | 0.707 | 0.233 | 3.49E-274 | 0 | 1 |
| MCRIP2   | 1.20E-282 | 0.920365149 | 0.691 | 0.227 | 2.33E-278 | 0 | 1 |
| BACE2    | 1.44E-307 | 0.919472384 | 0.686 | 0.194 | 2.80E-303 | 0 | 1 |
| TRPM4    | 0         | 0.911619193 | 0.589 | 0.136 | 0         | 0 | 1 |
| MT-ND4   | 0         | 0.906926443 | 0.995 | 0.991 | 0         | 0 | 1 |
| ATP5MG   | 6.93E-238 | 0.905240146 | 0.964 | 0.838 | 1.34E-233 | 0 | 1 |
| GNG5     | 1.59E-213 | 0.90523128  | 0.902 | 0.5   | 3.08E-209 | 0 | 1 |
| MUC1     | 0         | 0.905080372 | 0.574 | 0.123 | 0         | 0 | 1 |
| ATP5MC3  | 1.44E-204 | 0.899394975 | 0.916 | 0.58  | 2.79E-200 | 0 | 1 |
| S100A16  | 9.85E-282 | 0.897046382 | 0.712 | 0.222 | 1.91E-277 | 0 | 1 |
| ZFAS1    | 5.93E-151 | 0.895944423 | 0.931 | 0.615 | 1.15E-146 | 0 | 1 |
| SH3YL1   | 2.14E-298 | 0.894610909 | 0.722 | 0.23  | 4.15E-294 | 0 | 1 |

|          |           |             |       |       |           |   |   |
|----------|-----------|-------------|-------|-------|-----------|---|---|
| LDHA     | 2.67E-180 | 0.891049051 | 0.938 | 0.623 | 5.18E-176 | 0 | 1 |
| TM4SF1   | 2.49E-235 | 0.886289346 | 0.553 | 0.143 | 4.82E-231 | 0 | 1 |
| TMEM54   | 7.83E-289 | 0.878837462 | 0.758 | 0.243 | 1.52E-284 | 0 | 1 |
| NDUFB3   | 3.47E-210 | 0.877121835 | 0.838 | 0.421 | 6.73E-206 | 0 | 1 |
| TMEM176A | 1.89E-307 | 0.867752627 | 0.696 | 0.198 | 3.67E-303 | 0 | 1 |
| SFN      | 2.71E-294 | 0.865688884 | 0.675 | 0.188 | 5.25E-290 | 0 | 1 |
| TSTA3    | 1.74E-227 | 0.86539063  | 0.769 | 0.314 | 3.38E-223 | 0 | 1 |
| PRDX1    | 1.22E-191 | 0.864987431 | 0.905 | 0.552 | 2.36E-187 | 0 | 1 |
| COX5B    | 7.28E-221 | 0.864515693 | 0.956 | 0.692 | 1.41E-216 | 0 | 1 |
| PDLIM1   | 8.01E-259 | 0.864230872 | 0.787 | 0.291 | 1.55E-254 | 0 | 1 |
| EDN1     | 5.92E-260 | 0.862411902 | 0.399 | 0.07  | 1.15E-255 | 0 | 1 |
| ASS1     | 2.32E-177 | 0.859600051 | 0.468 | 0.139 | 4.50E-173 | 0 | 1 |
| NDUFAB1  | 2.78E-203 | 0.855225401 | 0.832 | 0.409 | 5.38E-199 | 0 | 1 |
| GPX2     | 1.14E-240 | 0.845550431 | 0.839 | 0.316 | 2.20E-236 | 0 | 1 |
| CLDN4    | 7.46E-221 | 0.843751345 | 0.902 | 0.385 | 1.45E-216 | 0 | 1 |
| DBI      | 5.69E-171 | 0.843635048 | 0.895 | 0.567 | 1.10E-166 | 0 | 1 |
| MT1G     | 5.13E-293 | 0.842840088 | 0.502 | 0.097 | 9.96E-289 | 0 | 1 |
| RPL37A   | 0         | 0.842040623 | 0.992 | 0.975 | 0         | 0 | 1 |
| C12orf75 | 9.94E-227 | 0.836342419 | 0.831 | 0.348 | 1.93E-222 | 0 | 1 |
| TMEM106C | 3.51E-238 | 0.834652195 | 0.707 | 0.255 | 6.81E-234 | 0 | 1 |
| MDK      | 0         | 0.83077159  | 0.815 | 0.263 | 0         | 0 | 1 |
| FAM84A   | 5.35E-287 | 0.828803812 | 0.651 | 0.181 | 1.04E-282 | 0 | 1 |
| LIPH     | 3.94E-290 | 0.828368951 | 0.56  | 0.133 | 7.65E-286 | 0 | 1 |
| RPL37    | 5.74E-294 | 0.827501551 | 0.986 | 0.974 | 1.11E-289 | 0 | 1 |
| LAPTM4B  | 8.28E-290 | 0.82657054  | 0.59  | 0.153 | 1.61E-285 | 0 | 1 |
| RPS7     | 5.56E-281 | 0.822331288 | 0.981 | 0.964 | 1.08E-276 | 0 | 1 |
| AGPAT2   | 3.30E-242 | 0.81821255  | 0.699 | 0.245 | 6.40E-238 | 0 | 1 |
| KIF5B    | 3.44E-175 | 0.817179138 | 0.85  | 0.438 | 6.67E-171 | 0 | 1 |
| EIF4EBP1 | 1.62E-266 | 0.815816886 | 0.647 | 0.199 | 3.14E-262 | 0 | 1 |
| COX6A1   | 5.49E-204 | 0.814941977 | 0.948 | 0.673 | 1.07E-199 | 0 | 1 |
| ATP5PF   | 3.28E-179 | 0.813801221 | 0.907 | 0.565 | 6.36E-175 | 0 | 1 |
| TMC5     | 3.72E-223 | 0.809957802 | 0.579 | 0.177 | 7.21E-219 | 0 | 1 |
| TPM2     | 0         | 0.804638346 | 0.419 | 0.032 | 0         | 0 | 1 |
| SELENBP1 | 1.09E-256 | 0.802313943 | 0.575 | 0.154 | 2.11E-252 | 0 | 1 |
| MUC4     | 1.34E-268 | 0.800387817 | 0.482 | 0.099 | 2.59E-264 | 0 | 1 |
| CLDN2    | 0         | 0.800374763 | 0.463 | 0.061 | 0         | 0 | 1 |
| RPL7A    | 2.61E-274 | 0.800197046 | 0.983 | 0.943 | 5.05E-270 | 0 | 1 |
| BCL2L15  | 0         | 0.793342257 | 0.546 | 0.106 | 0         | 0 | 1 |
| RBP4     | 0         | 0.792649554 | 0.453 | 0.056 | 0         | 0 | 1 |
| RPS3     | 2.27E-287 | 0.792549442 | 0.995 | 0.991 | 4.40E-283 | 0 | 1 |
| APP      | 1.01E-222 | 0.791332855 | 0.825 | 0.318 | 1.96E-218 | 0 | 1 |
| RHOC     | 1.76E-193 | 0.790973208 | 0.84  | 0.388 | 3.41E-189 | 0 | 1 |
| ANXA2    | 7.64E-185 | 0.788455181 | 0.925 | 0.499 | 1.48E-180 | 0 | 1 |
| SNRPF    | 2.69E-160 | 0.788090793 | 0.821 | 0.449 | 5.22E-156 | 0 | 1 |
| PDCD5    | 7.41E-228 | 0.785591919 | 0.771 | 0.314 | 1.44E-223 | 0 | 1 |
| PEBP1    | 4.39E-156 | 0.781515659 | 0.864 | 0.518 | 8.51E-152 | 0 | 1 |
| SERINC2  | 2.65E-238 | 0.781284351 | 0.665 | 0.218 | 5.14E-234 | 0 | 1 |
| TMEM176B | 2.89E-230 | 0.777741492 | 0.74  | 0.263 | 5.61E-226 | 0 | 1 |
| COX20    | 5.14E-202 | 0.777565694 | 0.785 | 0.336 | 9.97E-198 | 0 | 1 |
| MT-ND2   | 3.73E-244 | 0.775582252 | 0.996 | 0.988 | 7.24E-240 | 0 | 1 |
| COX8A    | 7.10E-161 | 0.773356644 | 0.918 | 0.645 | 1.38E-156 | 0 | 1 |

|         |           |             |       |       |           |   |   |
|---------|-----------|-------------|-------|-------|-----------|---|---|
| CLDN7   | 1.81E-233 | 0.769575455 | 0.784 | 0.28  | 3.51E-229 | 0 | 1 |
| NOXO1   | 0         | 0.769062156 | 0.473 | 0.081 | 0         | 0 | 1 |
| TCEA3   | 0         | 0.767182131 | 0.562 | 0.119 | 0         | 0 | 1 |
| ASCL2   | 2.20E-221 | 0.766012238 | 0.623 | 0.191 | 4.26E-217 | 0 | 1 |
| NDUFC1  | 3.27E-188 | 0.761953273 | 0.8   | 0.376 | 6.35E-184 | 0 | 1 |
| TALDO1  | 1.71E-170 | 0.757309145 | 0.806 | 0.406 | 3.32E-166 | 0 | 1 |
| SOD3    | 6.99E-295 | 0.755354033 | 0.51  | 0.102 | 1.36E-290 | 0 | 1 |
| RPS2    | 5.12E-248 | 0.752463391 | 0.992 | 0.997 | 9.93E-244 | 0 | 1 |
| TDGF1   | 0         | 0.750004705 | 0.477 | 0.068 | 0         | 0 | 1 |
| NDUFS5  | 2.18E-157 | 0.749206312 | 0.906 | 0.575 | 4.23E-153 | 0 | 1 |
| MACROD1 | 1.31E-283 | 0.747262219 | 0.556 | 0.139 | 2.53E-279 | 0 | 1 |
| COX6B1  | 5.68E-189 | 0.744588453 | 0.954 | 0.75  | 1.10E-184 | 0 | 1 |
| LSR     | 3.87E-211 | 0.742368221 | 0.74  | 0.277 | 7.51E-207 | 0 | 1 |
| TKT     | 3.93E-190 | 0.739370409 | 0.806 | 0.374 | 7.62E-186 | 0 | 1 |
| MT1X    | 1.52E-190 | 0.739106063 | 0.659 | 0.24  | 2.95E-186 | 0 | 1 |
| EMP2    | 4.63E-235 | 0.736903675 | 0.62  | 0.196 | 8.99E-231 | 0 | 1 |
| LGALS3  | 1.40E-218 | 0.73611805  | 0.943 | 0.504 | 2.72E-214 | 0 | 1 |
| LGALS4  | 1.38E-280 | 0.735400371 | 0.928 | 0.376 | 2.68E-276 | 0 | 1 |
| PRSS23  | 2.57E-285 | 0.733612506 | 0.589 | 0.137 | 4.98E-281 | 0 | 1 |
| FAM3D   | 2.60E-263 | 0.730179563 | 0.762 | 0.233 | 5.04E-259 | 0 | 1 |
| MSRB2   | 5.20E-220 | 0.729986019 | 0.636 | 0.223 | 1.01E-215 | 0 | 1 |
| MT-CO1  | 1.26E-264 | 0.727210221 | 0.998 | 0.994 | 2.44E-260 | 0 | 1 |
| KRTCAP3 | 3.52E-250 | 0.723530035 | 0.601 | 0.177 | 6.82E-246 | 0 | 1 |
| MDH2    | 5.74E-156 | 0.72086517  | 0.811 | 0.427 | 1.11E-151 | 0 | 1 |
| TINAGL1 | 3.16E-212 | 0.719587392 | 0.514 | 0.149 | 6.13E-208 | 0 | 1 |
| NDUFA1  | 1.11E-150 | 0.713375964 | 0.911 | 0.599 | 2.16E-146 | 0 | 1 |
| DYNLL1  | 1.21E-142 | 0.711786013 | 0.937 | 0.629 | 2.34E-138 | 0 | 1 |
| BLVRB   | 1.02E-221 | 0.710079639 | 0.678 | 0.242 | 1.97E-217 | 0 | 1 |
| CXADR   | 2.07E-233 | 0.709170589 | 0.683 | 0.219 | 4.01E-229 | 0 | 1 |
| NACA    | 2.59E-212 | 0.707636561 | 0.976 | 0.894 | 5.01E-208 | 0 | 1 |
| CD46    | 2.54E-185 | 0.705844153 | 0.808 | 0.354 | 4.93E-181 | 0 | 1 |
| RPS24   | 2.63E-266 | 0.702721956 | 0.99  | 0.98  | 5.09E-262 | 0 | 1 |
| COX7C   | 3.42E-196 | 0.70244311  | 0.964 | 0.838 | 6.62E-192 | 0 | 1 |
| MT2A    | 1.14E-168 | 0.700322165 | 0.671 | 0.261 | 2.21E-164 | 0 | 1 |
| TIMM8B  | 6.82E-166 | 0.700301225 | 0.766 | 0.364 | 1.32E-161 | 0 | 1 |
| HSPD1   | 3.45E-138 | 0.697364548 | 0.861 | 0.494 | 6.68E-134 | 0 | 1 |
| HINT1   | 5.70E-183 | 0.697281702 | 0.956 | 0.775 | 1.11E-178 | 0 | 1 |
| MPC2    | 5.13E-159 | 0.695451186 | 0.816 | 0.398 | 9.95E-155 | 0 | 1 |
| AP1S1   | 7.84E-208 | 0.69359877  | 0.671 | 0.248 | 1.52E-203 | 0 | 1 |
| NTHL1   | 8.81E-229 | 0.69146357  | 0.515 | 0.139 | 1.71E-224 | 0 | 1 |
| PLCB4   | 1.21E-222 | 0.689420755 | 0.431 | 0.099 | 2.34E-218 | 0 | 1 |
| PSMB2   | 7.17E-165 | 0.687011588 | 0.785 | 0.381 | 1.39E-160 | 0 | 1 |
| TMPRSS4 | 1.17E-264 | 0.685378693 | 0.516 | 0.122 | 2.27E-260 | 0 | 1 |
| COX7B   | 9.80E-147 | 0.684224412 | 0.923 | 0.648 | 1.90E-142 | 0 | 1 |
| NDRG1   | 1.76E-89  | 0.68120488  | 0.465 | 0.204 | 3.42E-85  | 0 | 1 |
| CLTB    | 5.55E-153 | 0.679782112 | 0.787 | 0.373 | 1.08E-148 | 0 | 1 |
| MAL2    | 3.16E-178 | 0.679563796 | 0.624 | 0.218 | 6.13E-174 | 0 | 1 |
| SNRPG   | 7.60E-132 | 0.679536279 | 0.889 | 0.574 | 1.47E-127 | 0 | 1 |
| NME4    | 3.74E-220 | 0.67499947  | 0.601 | 0.193 | 7.25E-216 | 0 | 1 |
| LMNA    | 8.00E-191 | 0.674961376 | 0.776 | 0.319 | 1.55E-186 | 0 | 1 |
| SEM1    | 1.04E-147 | 0.67459882  | 0.892 | 0.526 | 2.02E-143 | 0 | 1 |

|          |           |             |       |       |           |   |   |
|----------|-----------|-------------|-------|-------|-----------|---|---|
| MPZL2    | 7.81E-296 | 0.674577714 | 0.469 | 0.09  | 1.52E-291 | 0 | 1 |
| CDX2     | 2.28E-218 | 0.671636625 | 0.607 | 0.191 | 4.41E-214 | 0 | 1 |
| TUBB4B   | 9.06E-128 | 0.671149853 | 0.718 | 0.348 | 1.76E-123 | 0 | 1 |
| FERMT1   | 5.05E-272 | 0.669921861 | 0.493 | 0.109 | 9.80E-268 | 0 | 1 |
| COX7A2   | 2.40E-152 | 0.667870463 | 0.957 | 0.746 | 4.66E-148 | 0 | 1 |
| RPS21    | 6.08E-192 | 0.660913402 | 0.977 | 0.918 | 1.18E-187 | 0 | 1 |
| TFF3     | 4.02E-282 | 0.657042191 | 0.95  | 0.507 | 7.79E-278 | 0 | 1 |
| NAPRT    | 7.04E-204 | 0.655937337 | 0.623 | 0.215 | 1.37E-199 | 0 | 1 |
| RPL36A   | 8.13E-181 | 0.655242336 | 0.966 | 0.88  | 1.58E-176 | 0 | 1 |
| TRIM2    | 1.55E-215 | 0.654930439 | 0.595 | 0.186 | 3.00E-211 | 0 | 1 |
| VDAC1    | 2.05E-150 | 0.654600019 | 0.878 | 0.472 | 3.98E-146 | 0 | 1 |
| NDUFB4   | 2.78E-136 | 0.653783304 | 0.88  | 0.51  | 5.40E-132 | 0 | 1 |
| C8orf59  | 1.59E-153 | 0.652934339 | 0.811 | 0.419 | 3.08E-149 | 0 | 1 |
| MRPS34   | 2.24E-143 | 0.652416583 | 0.748 | 0.374 | 4.34E-139 | 0 | 1 |
| ARPC1A   | 2.10E-182 | 0.651973123 | 0.725 | 0.303 | 4.07E-178 | 0 | 1 |
| MARCKSL  | 5.89E-197 | 0.651550697 | 0.898 | 0.405 | 1.14E-192 | 0 | 1 |
| ATP5MF   | 6.36E-117 | 0.650505352 | 0.889 | 0.607 | 1.23E-112 | 0 | 1 |
| TMBIM1   | 4.38E-172 | 0.650317296 | 0.534 | 0.179 | 8.50E-168 | 0 | 1 |
| GOLIM4   | 3.12E-159 | 0.649769863 | 0.627 | 0.251 | 6.06E-155 | 0 | 1 |
| VDAC2    | 4.71E-132 | 0.649458056 | 0.844 | 0.463 | 9.14E-128 | 0 | 1 |
| ETHE1    | 4.87E-181 | 0.646724767 | 0.712 | 0.282 | 9.44E-177 | 0 | 1 |
| SPATS2L  | 5.64E-195 | 0.645380834 | 0.636 | 0.23  | 1.09E-190 | 0 | 1 |
| IER3     | 5.83E-184 | 0.643370481 | 0.734 | 0.289 | 1.13E-179 | 0 | 1 |
| HES1     | 1.59E-175 | 0.643220565 | 0.684 | 0.256 | 3.09E-171 | 0 | 1 |
| HLA-DRB5 | 0         | 0.642814064 | 0.315 | 0.016 | 0         | 0 | 1 |
| PPIA     | 1.05E-133 | 0.639806656 | 0.946 | 0.786 | 2.03E-129 | 0 | 1 |
| PRSS8    | 1.16E-165 | 0.637377867 | 0.524 | 0.173 | 2.25E-161 | 0 | 1 |
| ACTN4    | 9.21E-154 | 0.637044407 | 0.768 | 0.347 | 1.79E-149 | 0 | 1 |
| GOLM1    | 3.24E-219 | 0.636742961 | 0.631 | 0.197 | 6.29E-215 | 0 | 1 |
| RPL22    | 1.34E-197 | 0.635655634 | 0.973 | 0.923 | 2.61E-193 | 0 | 1 |
| CYB5A    | 1.46E-177 | 0.635499668 | 0.672 | 0.261 | 2.84E-173 | 0 | 1 |
| COX5A    | 8.79E-131 | 0.63479561  | 0.874 | 0.518 | 1.71E-126 | 0 | 1 |
| AGR2     | 1.71E-267 | 0.633473626 | 0.927 | 0.394 | 3.31E-263 | 0 | 1 |
| NDUFB2   | 1.80E-121 | 0.630979815 | 0.88  | 0.572 | 3.49E-117 | 0 | 1 |
| MGST3    | 3.05E-135 | 0.629924759 | 0.835 | 0.432 | 5.92E-131 | 0 | 1 |
| ECHS1    | 7.92E-153 | 0.629045538 | 0.735 | 0.343 | 1.54E-148 | 0 | 1 |
| GMDS     | 3.57E-178 | 0.62848514  | 0.672 | 0.257 | 6.92E-174 | 0 | 1 |
| PKP3     | 1.48E-209 | 0.627352366 | 0.542 | 0.165 | 2.86E-205 | 0 | 1 |
| DEK      | 2.44E-123 | 0.625688593 | 0.847 | 0.48  | 4.74E-119 | 0 | 1 |
| TXNDC17  | 8.63E-154 | 0.625431515 | 0.756 | 0.353 | 1.67E-149 | 0 | 1 |
| CHCHD2   | 9.36E-137 | 0.623118798 | 0.947 | 0.749 | 1.82E-132 | 0 | 1 |
| MYC      | 1.29E-192 | 0.622339336 | 0.55  | 0.169 | 2.50E-188 | 0 | 1 |
| SERPINB6 | 3.86E-161 | 0.621334674 | 0.768 | 0.346 | 7.49E-157 | 0 | 1 |
| SNRPE    | 2.55E-128 | 0.62063463  | 0.857 | 0.48  | 4.95E-124 | 0 | 1 |
| CAMTA1   | 1.38E-149 | 0.619601032 | 0.746 | 0.349 | 2.67E-145 | 0 | 1 |
| RHOBTB3  | 1.40E-215 | 0.618552988 | 0.585 | 0.176 | 2.71E-211 | 0 | 1 |
| C1orf21  | 2.11E-229 | 0.617841863 | 0.553 | 0.157 | 4.09E-225 | 0 | 1 |
| ATP5F1C  | 4.05E-118 | 0.613594336 | 0.844 | 0.501 | 7.86E-114 | 0 | 1 |
| ERBB3    | 3.39E-197 | 0.61044188  | 0.597 | 0.198 | 6.58E-193 | 0 | 1 |
| UQCRC1   | 2.32E-141 | 0.609555862 | 0.758 | 0.365 | 4.49E-137 | 0 | 1 |
| LIMA1    | 8.93E-168 | 0.608673211 | 0.715 | 0.278 | 1.73E-163 | 0 | 1 |

|           |           |             |       |       |           |   |   |
|-----------|-----------|-------------|-------|-------|-----------|---|---|
| PPP1R1B   | 1.40E-185 | 0.607944469 | 0.676 | 0.234 | 2.72E-181 | 0 | 1 |
| NENF      | 1.91E-152 | 0.607882699 | 0.752 | 0.354 | 3.71E-148 | 0 | 1 |
| PLP2      | 1.87E-125 | 0.606894807 | 0.804 | 0.443 | 3.63E-121 | 0 | 1 |
| RPL24     | 1.66E-201 | 0.603706396 | 0.974 | 0.941 | 3.21E-197 | 0 | 1 |
| CENPW     | 4.11E-158 | 0.603695817 | 0.326 | 0.076 | 7.98E-154 | 0 | 1 |
| HEBP2     | 2.34E-155 | 0.603593854 | 0.728 | 0.319 | 4.53E-151 | 0 | 1 |
| CDC42EP5  | 3.44E-210 | 0.603482422 | 0.579 | 0.172 | 6.67E-206 | 0 | 1 |
| VIL1      | 1.75E-180 | 0.601898397 | 0.588 | 0.203 | 3.39E-176 | 0 | 1 |
| SLC25A3   | 2.71E-114 | 0.601043042 | 0.893 | 0.582 | 5.26E-110 | 0 | 1 |
| PTPRF     | 1.14E-195 | 0.59770995  | 0.561 | 0.181 | 2.21E-191 | 0 | 1 |
| CMBL      | 1.89E-202 | 0.597684331 | 0.504 | 0.143 | 3.67E-198 | 0 | 1 |
| ALDOA     | 2.36E-160 | 0.597174563 | 0.579 | 0.219 | 4.57E-156 | 0 | 1 |
| CTTN      | 8.39E-169 | 0.590357227 | 0.582 | 0.21  | 1.63E-164 | 0 | 1 |
| ATP1A1    | 7.59E-132 | 0.589851503 | 0.844 | 0.441 | 1.47E-127 | 0 | 1 |
| MZT2B     | 8.62E-114 | 0.588612297 | 0.867 | 0.532 | 1.67E-109 | 0 | 1 |
| TUBA1C    | 5.69E-153 | 0.581991111 | 0.591 | 0.233 | 1.10E-148 | 0 | 1 |
| NUPR1     | 1.86E-228 | 0.581557702 | 0.7   | 0.22  | 3.61E-224 | 0 | 1 |
| BNIP3     | 1.52E-178 | 0.580554915 | 0.396 | 0.094 | 2.94E-174 | 0 | 1 |
| MUC13     | 1.11E-80  | 0.578949593 | 0.431 | 0.188 | 2.15E-76  | 0 | 1 |
| RPL31     | 4.10E-184 | 0.578927107 | 0.989 | 0.977 | 7.96E-180 | 0 | 1 |
| CKS1B     | 2.21E-111 | 0.578841152 | 0.454 | 0.179 | 4.29E-107 | 0 | 1 |
| CLIC1     | 1.29E-128 | 0.576929782 | 0.965 | 0.789 | 2.49E-124 | 0 | 1 |
| GCSH      | 8.75E-185 | 0.575552478 | 0.553 | 0.185 | 1.70E-180 | 0 | 1 |
| CYC1      | 5.29E-112 | 0.572225654 | 0.78  | 0.409 | 1.03E-107 | 0 | 1 |
| NDUFA10   | 5.35E-151 | 0.572135867 | 0.666 | 0.286 | 1.04E-146 | 0 | 1 |
| SLC9A3R2  | 2.76E-215 | 0.57187938  | 0.484 | 0.127 | 5.35E-211 | 0 | 1 |
| NDUFS6    | 3.26E-103 | 0.571764817 | 0.81  | 0.475 | 6.32E-99  | 0 | 1 |
| SELENOW   | 5.04E-116 | 0.571538807 | 0.786 | 0.414 | 9.78E-112 | 0 | 1 |
| AC004556. | 6.53E-247 | 0.56993055  | 0.483 | 0.11  | 1.27E-242 | 0 | 1 |
| COX4I1    | 8.83E-144 | 0.568509025 | 0.96  | 0.853 | 1.71E-139 | 0 | 1 |
| DSG2      | 8.26E-151 | 0.566258658 | 0.602 | 0.223 | 1.60E-146 | 0 | 1 |
| BOLA3     | 2.92E-160 | 0.565951671 | 0.542 | 0.195 | 5.67E-156 | 0 | 1 |
| ATP5F1B   | 5.08E-103 | 0.564996271 | 0.873 | 0.531 | 9.85E-99  | 0 | 1 |
| ATP5PO    | 2.44E-104 | 0.564776495 | 0.873 | 0.576 | 4.73E-100 | 0 | 1 |
| S100A13   | 8.70E-181 | 0.564052222 | 0.521 | 0.165 | 1.69E-176 | 0 | 1 |
| ANXA4     | 8.29E-223 | 0.563033502 | 0.795 | 0.316 | 1.61E-218 | 0 | 1 |
| RPS16     | 6.50E-184 | 0.561924033 | 0.982 | 0.982 | 1.26E-179 | 0 | 1 |
| AP1M2     | 1.12E-178 | 0.561872416 | 0.534 | 0.176 | 2.18E-174 | 0 | 1 |
| EI24      | 2.38E-148 | 0.559461247 | 0.681 | 0.29  | 4.61E-144 | 0 | 1 |
| HSBP1     | 2.18E-122 | 0.559334145 | 0.819 | 0.435 | 4.23E-118 | 0 | 1 |
| EBPL      | 5.81E-146 | 0.558340216 | 0.615 | 0.253 | 1.13E-141 | 0 | 1 |
| TM9SF3    | 4.75E-142 | 0.557072822 | 0.739 | 0.332 | 9.21E-138 | 0 | 1 |
| SYAP1     | 5.82E-139 | 0.556636196 | 0.69  | 0.314 | 1.13E-134 | 0 | 1 |
| PAFAH1B3  | 5.73E-167 | 0.556087575 | 0.6   | 0.221 | 1.11E-162 | 0 | 1 |
| MPC1      | 1.44E-142 | 0.556086683 | 0.628 | 0.269 | 2.79E-138 | 0 | 1 |
| POLR2L    | 2.12E-88  | 0.552892317 | 0.88  | 0.635 | 4.11E-84  | 0 | 1 |
| PDCD6     | 4.19E-124 | 0.55007881  | 0.788 | 0.405 | 8.12E-120 | 0 | 1 |
| ETS2      | 7.97E-162 | 0.549543306 | 0.647 | 0.246 | 1.55E-157 | 0 | 1 |
| KLF5      | 6.37E-175 | 0.548860631 | 0.714 | 0.259 | 1.24E-170 | 0 | 1 |
| SLC25A6   | 2.74E-111 | 0.548179694 | 0.954 | 0.809 | 5.32E-107 | 0 | 1 |
| TPM1      | 7.29E-186 | 0.54789227  | 0.817 | 0.32  | 1.41E-181 | 0 | 1 |

|          |           |             |       |       |           |   |   |
|----------|-----------|-------------|-------|-------|-----------|---|---|
| BICDL2   | 1.57E-176 | 0.545148043 | 0.48  | 0.147 | 3.04E-172 | 0 | 1 |
| APLP2    | 1.36E-129 | 0.544396751 | 0.764 | 0.361 | 2.65E-125 | 0 | 1 |
| CDX1     | 2.42E-165 | 0.544396472 | 0.59  | 0.208 | 4.69E-161 | 0 | 1 |
| PSMB1    | 4.30E-92  | 0.543845158 | 0.866 | 0.564 | 8.34E-88  | 0 | 1 |
| NDUFAF2  | 3.62E-183 | 0.543371144 | 0.537 | 0.176 | 7.03E-179 | 0 | 1 |
| POLR1D   | 3.44E-111 | 0.53762088  | 0.793 | 0.429 | 6.67E-107 | 0 | 1 |
| PPP1R14B | 1.24E-147 | 0.535884928 | 0.657 | 0.274 | 2.41E-143 | 0 | 1 |
| VSNL1    | 1.26E-188 | 0.53582324  | 0.354 | 0.076 | 2.45E-184 | 0 | 1 |
| ADAM15   | 1.84E-208 | 0.535473966 | 0.45  | 0.114 | 3.57E-204 | 0 | 1 |
| MGAT4B   | 6.24E-171 | 0.535470059 | 0.46  | 0.141 | 1.21E-166 | 0 | 1 |
| GNGI2    | 2.19E-182 | 0.534285176 | 0.46  | 0.133 | 4.25E-178 | 0 | 1 |
| METTL26  | 5.21E-145 | 0.533475806 | 0.69  | 0.311 | 1.01E-140 | 0 | 1 |
| S100A14  | 3.00E-163 | 0.532516113 | 0.615 | 0.218 | 5.81E-159 | 0 | 1 |
| NDUFB10  | 4.11E-102 | 0.531941013 | 0.819 | 0.486 | 7.97E-98  | 0 | 1 |
| PTTG1IP  | 1.01E-114 | 0.529022484 | 0.594 | 0.266 | 1.95E-110 | 0 | 1 |
| ZNF703   | 6.73E-170 | 0.529009578 | 0.444 | 0.131 | 1.31E-165 | 0 | 1 |
| SNHG8    | 9.51E-114 | 0.528862969 | 0.796 | 0.434 | 1.84E-109 | 0 | 1 |
| POF1B    | 7.94E-172 | 0.528056938 | 0.443 | 0.13  | 1.54E-167 | 0 | 1 |
| ACP1     | 3.42E-119 | 0.526737251 | 0.732 | 0.375 | 6.63E-115 | 0 | 1 |
| RAN      | 1.34E-81  | 0.526003917 | 0.878 | 0.6   | 2.60E-77  | 0 | 1 |
| ECI1     | 3.23E-162 | 0.523930771 | 0.47  | 0.155 | 6.26E-158 | 0 | 1 |
| TAGLN2   | 4.11E-98  | 0.523853408 | 0.842 | 0.509 | 7.97E-94  | 0 | 1 |
| GGCT     | 7.49E-127 | 0.52235168  | 0.562 | 0.233 | 1.45E-122 | 0 | 1 |
| HOXB8    | 8.21E-181 | 0.519765809 | 0.37  | 0.086 | 1.59E-176 | 0 | 1 |
| ATP5PB   | 2.33E-98  | 0.519318798 | 0.813 | 0.472 | 4.53E-94  | 0 | 1 |
| HADH     | 5.64E-160 | 0.518257858 | 0.489 | 0.164 | 1.09E-155 | 0 | 1 |
| ARF5     | 3.42E-121 | 0.518176794 | 0.734 | 0.363 | 6.64E-117 | 0 | 1 |
| RPL35A   | 1.37E-162 | 0.517873768 | 0.992 | 0.984 | 2.66E-158 | 0 | 1 |
| FAM162A  | 7.69E-143 | 0.51735366  | 0.743 | 0.327 | 1.49E-138 | 0 | 1 |
| TFRC     | 3.79E-159 | 0.517327531 | 0.558 | 0.197 | 7.36E-155 | 0 | 1 |
| MRPL14   | 6.07E-130 | 0.517191151 | 0.724 | 0.341 | 1.18E-125 | 0 | 1 |
| PSMA7    | 3.78E-85  | 0.516714992 | 0.915 | 0.665 | 7.34E-81  | 0 | 1 |
| CHMP4B   | 2.17E-120 | 0.515868634 | 0.78  | 0.375 | 4.20E-116 | 0 | 1 |
| KIF9     | 1.90E-183 | 0.514716821 | 0.383 | 0.094 | 3.69E-179 | 0 | 1 |
| CD59     | 3.78E-138 | 0.513045515 | 0.588 | 0.24  | 7.32E-134 | 0 | 1 |
| PLPP2    | 2.56E-148 | 0.51288118  | 0.536 | 0.191 | 4.96E-144 | 0 | 1 |
| PTTG1    | 2.17E-55  | 0.512393769 | 0.33  | 0.145 | 4.20E-51  | 0 | 1 |
| HOXB6    | 1.20E-171 | 0.511994785 | 0.398 | 0.105 | 2.32E-167 | 0 | 1 |
| PPIC     | 3.27E-166 | 0.510381022 | 0.555 | 0.186 | 6.34E-162 | 0 | 1 |
| GFPT1    | 1.61E-135 | 0.510333026 | 0.584 | 0.239 | 3.11E-131 | 0 | 1 |
| MT-ND4L  | 2.89E-98  | 0.509997101 | 0.825 | 0.483 | 5.61E-94  | 0 | 1 |
| HIGD2A   | 1.02E-97  | 0.509537435 | 0.864 | 0.529 | 1.98E-93  | 0 | 1 |
| LAD1     | 3.55E-155 | 0.509462264 | 0.498 | 0.168 | 6.89E-151 | 0 | 1 |
| ITM2C    | 4.20E-156 | 0.507466258 | 0.829 | 0.4   | 8.15E-152 | 0 | 1 |
| MYH14    | 1.77E-153 | 0.507359781 | 0.469 | 0.154 | 3.42E-149 | 0 | 1 |
| AURKAIP1 | 5.56E-100 | 0.506925094 | 0.803 | 0.464 | 1.08E-95  | 0 | 1 |
| KCNN4    | 3.88E-183 | 0.506891441 | 0.477 | 0.135 | 7.52E-179 | 0 | 1 |
| NDUFA12  | 4.07E-105 | 0.506337049 | 0.754 | 0.403 | 7.89E-101 | 0 | 1 |
| NHP2     | 1.03E-107 | 0.506283471 | 0.744 | 0.388 | 2.01E-103 | 0 | 1 |
| RPL29    | 9.59E-149 | 0.506101495 | 0.986 | 0.961 | 1.86E-144 | 0 | 1 |
| SORL1    | 1.92E-123 | 0.504787602 | 0.514 | 0.198 | 3.72E-119 | 0 | 1 |

|          |           |             |       |       |           |   |   |
|----------|-----------|-------------|-------|-------|-----------|---|---|
| RPL14    | 7.15E-151 | 0.50380682  | 0.978 | 0.965 | 1.39E-146 | 0 | 1 |
| ICA1     | 4.83E-189 | 0.503163926 | 0.498 | 0.147 | 9.36E-185 | 0 | 1 |
| NFIA     | 2.28E-175 | 0.503110518 | 0.496 | 0.153 | 4.41E-171 | 0 | 1 |
| SPINK4   | 4.85E-116 | 4.99473869  | 0.395 | 0.117 | 9.41E-112 | 4 | 2 |
| FCGBP    | 0         | 3.827795204 | 0.579 | 0.08  | 0         | 4 | 2 |
| REG4     | 5.60E-286 | 3.763049904 | 0.479 | 0.072 | 1.09E-281 | 4 | 2 |
| MUC2     | 0         | 3.101749685 | 0.457 | 0.038 | 0         | 4 | 2 |
| SOX4     | 2.88E-204 | 2.586273748 | 0.815 | 0.334 | 5.59E-200 | 4 | 2 |
| HES6     | 0         | 2.528317292 | 0.703 | 0.142 | 0         | 4 | 2 |
| WFDC2    | 1.22E-241 | 2.297374869 | 0.495 | 0.092 | 2.36E-237 | 4 | 2 |
| HEPACAM  | 0         | 2.202880825 | 0.658 | 0.008 | 0         | 4 | 2 |
| ANXA13   | 0         | 2.155042496 | 0.594 | 0.067 | 0         | 4 | 2 |
| KLK1     | 1.52E-228 | 2.069818296 | 0.542 | 0.128 | 2.95E-224 | 4 | 2 |
| KLK12    | 0         | 1.976819007 | 0.51  | 0.015 | 0         | 4 | 2 |
| IGFBP2   | 6.54E-132 | 1.770769707 | 0.471 | 0.136 | 1.27E-127 | 4 | 2 |
| SPINK1   | 2.01E-227 | 1.769445652 | 0.867 | 0.336 | 3.89E-223 | 4 | 2 |
| STARD10  | 5.21E-232 | 1.480981128 | 0.792 | 0.282 | 1.01E-227 | 4 | 2 |
| LRRC26   | 0         | 1.479108526 | 0.562 | 0.057 | 0         | 4 | 2 |
| SERPINA1 | 8.90E-153 | 1.471569391 | 0.52  | 0.143 | 1.73E-148 | 4 | 2 |
| GSN      | 1.02E-116 | 1.442181945 | 0.572 | 0.219 | 1.98E-112 | 4 | 2 |
| ST6GALNA | 6.26E-198 | 1.424733851 | 0.453 | 0.095 | 1.21E-193 | 4 | 2 |
| KLK11    | 0         | 1.391371827 | 0.509 | 0.046 | 0         | 4 | 2 |
| PHGR1    | 6.69E-152 | 1.356783272 | 0.825 | 0.373 | 1.30E-147 | 4 | 2 |
| RASD1    | 1.62E-267 | 1.275216235 | 0.334 | 0.03  | 3.14E-263 | 4 | 2 |
| IL13RA1  | 2.85E-206 | 1.264796831 | 0.576 | 0.153 | 5.52E-202 | 4 | 2 |
| STMN1    | 1.23E-118 | 1.231464094 | 0.67  | 0.287 | 2.38E-114 | 4 | 2 |
| ATOH1    | 0         | 1.223273251 | 0.434 | 0.005 | 0         | 4 | 2 |
| ID1      | 7.53E-24  | 1.10855534  | 0.373 | 0.221 | 1.46E-19  | 4 | 2 |
| RASSF6   | 4.01E-133 | 1.10256474  | 0.439 | 0.12  | 7.78E-129 | 4 | 2 |
| CADPS    | 8.47E-175 | 1.060638358 | 0.343 | 0.056 | 1.64E-170 | 4 | 2 |
| KIAA1324 | 2.00E-261 | 1.054934143 | 0.536 | 0.098 | 3.89E-257 | 4 | 2 |
| TFF1     | 5.22E-68  | 1.049979043 | 0.431 | 0.174 | 1.01E-63  | 4 | 2 |
| RAB26    | 0         | 1.0484279   | 0.417 | 0.011 | 0         | 4 | 2 |
| EGR1     | 1.04E-127 | 1.039656998 | 0.75  | 0.323 | 2.01E-123 | 4 | 2 |
| FAM213A  | 9.87E-188 | 1.01449069  | 0.583 | 0.163 | 1.91E-183 | 4 | 2 |
| AZGP1    | 5.29E-110 | 1.008246904 | 0.462 | 0.151 | 1.03E-105 | 4 | 2 |
| GADD45G  | 8.29E-103 | 1.006814505 | 0.302 | 0.07  | 1.61E-98  | 4 | 2 |
| H3F3A    | 2.03E-137 | 1.001517753 | 0.985 | 0.92  | 3.94E-133 | 4 | 2 |
| NREP     | 5.99E-157 | 0.985863547 | 0.311 | 0.051 | 1.16E-152 | 4 | 2 |
| HSPA2    | 1.09E-299 | 0.979334075 | 0.32  | 0.022 | 2.12E-295 | 4 | 2 |
| SELENOM  | 6.00E-96  | 0.964760684 | 0.486 | 0.172 | 1.16E-91  | 4 | 2 |
| COX6C    | 2.96E-90  | 0.950861482 | 0.952 | 0.712 | 5.74E-86  | 4 | 2 |
| SEC11C   | 8.47E-79  | 0.947102302 | 0.65  | 0.317 | 1.64E-74  | 4 | 2 |
| TUBA1A   | 1.99E-30  | 0.931133466 | 0.458 | 0.264 | 3.86E-26  | 4 | 2 |
| TSPAN13  | 7.47E-142 | 0.923803203 | 0.718 | 0.299 | 1.45E-137 | 4 | 2 |
| PHLDA1   | 8.43E-119 | 0.886120243 | 0.58  | 0.199 | 1.64E-114 | 4 | 2 |
| FOXA3    | 1.12E-168 | 0.84934976  | 0.484 | 0.124 | 2.18E-164 | 4 | 2 |
| FABP2    | 1.67E-91  | 0.829244112 | 0.319 | 0.088 | 3.24E-87  | 4 | 2 |
| ITGA6    | 2.49E-81  | 0.824276047 | 0.539 | 0.232 | 4.84E-77  | 4 | 2 |
| MARCKS   | 3.39E-80  | 0.817119845 | 0.733 | 0.379 | 6.57E-76  | 4 | 2 |
| BCAS1    | 1.39E-108 | 0.812861124 | 0.33  | 0.081 | 2.70E-104 | 4 | 2 |



|          |           |             |       |       |           |   |   |
|----------|-----------|-------------|-------|-------|-----------|---|---|
| BIK      | 1.59E-92  | 0.810186121 | 0.428 | 0.149 | 3.08E-88  | 4 | 2 |
| PROX1    | 1.39E-221 | 0.790294875 | 0.389 | 0.055 | 2.69E-217 | 4 | 2 |
| FOXA2    | 4.35E-135 | 0.788687952 | 0.39  | 0.095 | 8.43E-131 | 4 | 2 |
| RAB2A    | 7.78E-90  | 0.776338557 | 0.802 | 0.47  | 1.51E-85  | 4 | 2 |
| COLCA1   | 0         | 0.775864461 | 0.358 | 0.028 | 0         | 4 | 2 |
| KLF4     | 2.74E-73  | 0.768874264 | 0.484 | 0.203 | 5.31E-69  | 4 | 2 |
| ASRGL1   | 7.87E-164 | 0.764892268 | 0.488 | 0.125 | 1.53E-159 | 4 | 2 |
| MGLL     | 2.74E-109 | 0.763197241 | 0.508 | 0.181 | 5.32E-105 | 4 | 2 |
| TPD52    | 1.41E-84  | 0.762082725 | 0.778 | 0.438 | 2.73E-80  | 4 | 2 |
| OCIAD2   | 8.14E-96  | 0.756541803 | 0.848 | 0.482 | 1.58E-91  | 4 | 2 |
| NEURL1   | 0         | 0.753953417 | 0.363 | 0.009 | 0         | 4 | 2 |
| ASPH     | 6.96E-93  | 0.750928551 | 0.587 | 0.252 | 1.35E-88  | 4 | 2 |
| CAMK2N1  | 9.55E-94  | 0.749309977 | 0.659 | 0.283 | 1.85E-89  | 4 | 2 |
| HMGB3    | 3.65E-77  | 0.74685427  | 0.43  | 0.168 | 7.07E-73  | 4 | 2 |
| MAP7     | 1.22E-166 | 0.74312237  | 0.536 | 0.15  | 2.37E-162 | 4 | 2 |
| CCDC14   | 8.68E-116 | 0.738146378 | 0.568 | 0.203 | 1.68E-111 | 4 | 2 |
| CD63     | 7.24E-91  | 0.737479483 | 0.958 | 0.708 | 1.41E-86  | 4 | 2 |
| CREB3L1  | 1.53E-90  | 0.732459125 | 0.36  | 0.114 | 2.97E-86  | 4 | 2 |
| PTMS     | 5.76E-91  | 0.721740447 | 0.681 | 0.316 | 1.12E-86  | 4 | 2 |
| CKAP4    | 4.60E-112 | 0.719774747 | 0.491 | 0.171 | 8.93E-108 | 4 | 2 |
| RAP1GAP  | 1.10E-305 | 0.714742776 | 0.343 | 0.026 | 2.13E-301 | 4 | 2 |
| KCNQ1OT  | 6.99E-61  | 0.714092436 | 0.394 | 0.159 | 1.36E-56  | 4 | 2 |
| KDELRL1  | 3.48E-81  | 0.705741318 | 0.707 | 0.384 | 6.75E-77  | 4 | 2 |
| SMIM31   | 1.29E-129 | 0.70012599  | 0.435 | 0.119 | 2.50E-125 | 4 | 2 |
| SPDEF    | 8.06E-257 | 0.699880631 | 0.3   | 0.024 | 1.56E-252 | 4 | 2 |
| ARFGEF3  | 5.98E-170 | 0.694720556 | 0.427 | 0.093 | 1.16E-165 | 4 | 2 |
| CDH1     | 5.20E-101 | 0.691348182 | 0.575 | 0.228 | 1.01E-96  | 4 | 2 |
| CHD7     | 1.17E-85  | 0.688102845 | 0.443 | 0.162 | 2.27E-81  | 4 | 2 |
| SMAD9    | 4.24E-279 | 0.683027056 | 0.308 | 0.022 | 8.22E-275 | 4 | 2 |
| ZKSCAN1  | 1.07E-99  | 0.680167776 | 0.647 | 0.274 | 2.08E-95  | 4 | 2 |
| SLC44A1  | 9.50E-95  | 0.677122703 | 0.644 | 0.29  | 1.84E-90  | 4 | 2 |
| CLRN3    | 3.74E-139 | 0.675396718 | 0.425 | 0.111 | 7.25E-135 | 4 | 2 |
| RAB13    | 7.01E-116 | 0.672785185 | 0.594 | 0.226 | 1.36E-111 | 4 | 2 |
| EHF      | 8.66E-112 | 0.672656601 | 0.503 | 0.173 | 1.68E-107 | 4 | 2 |
| PLEKHB1  | 1.55E-195 | 0.672547698 | 0.372 | 0.058 | 3.00E-191 | 4 | 2 |
| FNBP1L   | 5.01E-93  | 0.66656225  | 0.466 | 0.171 | 9.72E-89  | 4 | 2 |
| RNASE1   | 3.09E-74  | 0.665302866 | 0.367 | 0.127 | 6.00E-70  | 4 | 2 |
| GSE1     | 7.93E-163 | 0.664092568 | 0.462 | 0.109 | 1.54E-158 | 4 | 2 |
| C4orf48  | 1.18E-57  | 0.664007491 | 0.7   | 0.39  | 2.30E-53  | 4 | 2 |
| PDXDC1   | 9.90E-129 | 0.66035379  | 0.598 | 0.215 | 1.92E-124 | 4 | 2 |
| LGALS3BP | 1.57E-79  | 0.652547837 | 0.632 | 0.281 | 3.04E-75  | 4 | 2 |
| AKAP9    | 1.35E-76  | 0.646579333 | 0.815 | 0.479 | 2.63E-72  | 4 | 2 |
| HOXA10   | 8.46E-112 | 0.645448967 | 0.46  | 0.148 | 1.64E-107 | 4 | 2 |
| H1FO     | 1.15E-82  | 0.643492485 | 0.516 | 0.21  | 2.22E-78  | 4 | 2 |
| DSP      | 4.49E-84  | 0.633761344 | 0.569 | 0.236 | 8.70E-80  | 4 | 2 |
| TRIB1    | 2.89E-49  | 0.633534386 | 0.43  | 0.202 | 5.60E-45  | 4 | 2 |
| PRUNE2   | 3.50E-159 | 0.63252283  | 0.378 | 0.073 | 6.79E-155 | 4 | 2 |
| ZFHX3    | 1.51E-64  | 0.627578882 | 0.353 | 0.132 | 2.92E-60  | 4 | 2 |
| SOX9     | 3.05E-66  | 0.626353487 | 0.477 | 0.207 | 5.91E-62  | 4 | 2 |
| HPCAL1   | 3.10E-88  | 0.615700209 | 0.544 | 0.224 | 6.01E-84  | 4 | 2 |
| VPS13A   | 4.76E-66  | 0.614377353 | 0.445 | 0.185 | 9.23E-62  | 4 | 2 |

|          |           |             |       |       |           |   |   |
|----------|-----------|-------------|-------|-------|-----------|---|---|
| DYNLT1   | 1.39E-71  | 0.611515441 | 0.818 | 0.481 | 2.69E-67  | 4 | 2 |
| RTN4     | 8.55E-46  | 0.604174743 | 0.78  | 0.503 | 1.66E-41  | 4 | 2 |
| H2AFY    | 4.78E-67  | 0.600244233 | 0.8   | 0.46  | 9.28E-63  | 4 | 2 |
| IFI6     | 3.09E-64  | 0.598789255 | 0.575 | 0.262 | 6.00E-60  | 4 | 2 |
| INSR     | 8.33E-63  | 0.598659142 | 0.349 | 0.13  | 1.62E-58  | 4 | 2 |
| NECTIN1  | 4.54E-160 | 0.593782252 | 0.371 | 0.072 | 8.81E-156 | 4 | 2 |
| CERS6    | 6.38E-70  | 0.593036019 | 0.451 | 0.188 | 1.24E-65  | 4 | 2 |
| ITPR2    | 3.17E-48  | 0.58302307  | 0.343 | 0.138 | 6.14E-44  | 4 | 2 |
| PRDX2    | 5.29E-55  | 0.577723103 | 0.778 | 0.474 | 1.03E-50  | 4 | 2 |
| CNPY2    | 4.04E-74  | 0.576838835 | 0.726 | 0.378 | 7.84E-70  | 4 | 2 |
| HSD11B2  | 1.82E-108 | 0.566936478 | 0.354 | 0.093 | 3.54E-104 | 4 | 2 |
| CNN3     | 2.25E-69  | 0.561597261 | 0.44  | 0.177 | 4.36E-65  | 4 | 2 |
| TMEM258  | 4.07E-55  | 0.560742724 | 0.922 | 0.647 | 7.90E-51  | 4 | 2 |
| MLXIP    | 2.00E-66  | 0.558909816 | 0.527 | 0.244 | 3.88E-62  | 4 | 2 |
| BMP4     | 4.34E-67  | 0.556785938 | 0.315 | 0.1   | 8.42E-63  | 4 | 2 |
| CDH17    | 5.95E-61  | 0.555748992 | 0.566 | 0.264 | 1.15E-56  | 4 | 2 |
| CBFA2T2  | 5.65E-99  | 0.555021358 | 0.337 | 0.087 | 1.10E-94  | 4 | 2 |
| CCDC112  | 1.16E-111 | 0.553475251 | 0.427 | 0.126 | 2.25E-107 | 4 | 2 |
| DYRK4    | 9.18E-130 | 0.5506783   | 0.342 | 0.073 | 1.78E-125 | 4 | 2 |
| ATF3     | 8.28E-26  | 0.550470796 | 0.43  | 0.251 | 1.61E-21  | 4 | 2 |
| ANKS4B   | 2.06E-116 | 0.548113223 | 0.323 | 0.074 | 4.00E-112 | 4 | 2 |
| PTS      | 3.65E-90  | 0.544488708 | 0.505 | 0.195 | 7.07E-86  | 4 | 2 |
| CD9      | 2.34E-61  | 0.543941895 | 0.777 | 0.415 | 4.53E-57  | 4 | 2 |
| PRDX4    | 4.78E-46  | 0.53994575  | 0.609 | 0.341 | 9.27E-42  | 4 | 2 |
| TSEN34   | 2.40E-80  | 0.538346664 | 0.569 | 0.251 | 4.66E-76  | 4 | 2 |
| CASP6    | 3.75E-83  | 0.535404805 | 0.458 | 0.174 | 7.27E-79  | 4 | 2 |
| SMARCC1  | 3.07E-60  | 0.533405924 | 0.538 | 0.264 | 5.95E-56  | 4 | 2 |
| ARHGAP32 | 5.66E-99  | 0.530296759 | 0.391 | 0.12  | 1.10E-94  | 4 | 2 |
| BTG2     | 7.97E-24  | 0.529857921 | 0.722 | 0.512 | 1.55E-19  | 4 | 2 |
| ZNF428   | 7.12E-53  | 0.527173506 | 0.491 | 0.239 | 1.38E-48  | 4 | 2 |
| MGST2    | 1.05E-74  | 0.523620605 | 0.677 | 0.315 | 2.03E-70  | 4 | 2 |
| CRACR2B  | 1.30E-78  | 0.522754023 | 0.399 | 0.143 | 2.53E-74  | 4 | 2 |
| HOXA9    | 4.71E-94  | 0.522523361 | 0.372 | 0.112 | 9.13E-90  | 4 | 2 |
| BAG1     | 1.11E-71  | 0.520697172 | 0.691 | 0.346 | 2.15E-67  | 4 | 2 |
| CXXC5    | 4.20E-75  | 0.519762226 | 0.524 | 0.225 | 8.15E-71  | 4 | 2 |
| STAP2    | 2.60E-85  | 0.517579287 | 0.471 | 0.178 | 5.04E-81  | 4 | 2 |
| ENY2     | 7.09E-32  | 0.515758415 | 0.692 | 0.459 | 1.38E-27  | 4 | 2 |
| TSC22D1  | 6.92E-64  | 0.515381955 | 0.705 | 0.349 | 1.34E-59  | 4 | 2 |
| TMEM98   | 6.12E-77  | 0.508702142 | 0.438 | 0.164 | 1.19E-72  | 4 | 2 |
| USH1C    | 4.42E-72  | 0.506433419 | 0.49  | 0.205 | 8.58E-68  | 4 | 2 |
| SEC61B   | 2.76E-42  | 0.504900005 | 0.882 | 0.621 | 5.35E-38  | 4 | 2 |
| SCP2     | 1.87E-58  | 0.504872922 | 0.798 | 0.492 | 3.63E-54  | 4 | 2 |
| PI3      | 2.53E-159 | 2.290523758 | 0.422 | 0.067 | 4.91E-155 | 7 | 3 |
| SLPI     | 1.16E-171 | 2.175008425 | 0.699 | 0.193 | 2.25E-167 | 7 | 3 |
| NEAT1    | 2.27E-98  | 2.174210399 | 0.893 | 0.802 | 4.40E-94  | 7 | 3 |
| PRSS3    | 2.60E-227 | 1.968375551 | 0.862 | 0.271 | 5.04E-223 | 7 | 3 |
| FTH1     | 5.03E-129 | 1.656494193 | 0.998 | 0.981 | 9.75E-125 | 7 | 3 |
| CST3     | 1.69E-141 | 1.607800473 | 0.953 | 0.558 | 3.27E-137 | 7 | 3 |
| HMGA1    | 1.16E-89  | 1.55707021  | 0.781 | 0.381 | 2.24E-85  | 7 | 3 |
| PRAC1    | 0         | 1.553872937 | 0.65  | 0.073 | 0         | 7 | 3 |
| PRAP1    | 4.72E-210 | 1.48072522  | 0.674 | 0.135 | 9.15E-206 | 7 | 3 |

|          |           |             |       |       |           |   |   |
|----------|-----------|-------------|-------|-------|-----------|---|---|
| VEGFA    | 1.67E-168 | 1.44504145  | 0.699 | 0.182 | 3.24E-164 | 7 | 3 |
| TRIM31   | 1.46E-241 | 1.430745667 | 0.587 | 0.09  | 2.83E-237 | 7 | 3 |
| TPT1     | 1.99E-141 | 1.426732318 | 0.998 | 0.984 | 3.86E-137 | 7 | 3 |
| KRT19    | 2.04E-124 | 1.407649474 | 0.906 | 0.412 | 3.96E-120 | 7 | 3 |
| LMO7     | 1.21E-133 | 1.353408386 | 0.632 | 0.18  | 2.36E-129 | 7 | 3 |
| CLTA     | 8.43E-125 | 1.332581244 | 0.884 | 0.504 | 1.63E-120 | 7 | 3 |
| RPS6     | 1.84E-89  | 1.240669142 | 0.987 | 0.993 | 3.57E-85  | 7 | 3 |
| CES2     | 2.10E-92  | 1.177953521 | 0.554 | 0.18  | 4.07E-88  | 7 | 3 |
| RRBP1    | 8.93E-82  | 1.146253046 | 0.766 | 0.382 | 1.73E-77  | 7 | 3 |
| RPS18    | 5.35E-98  | 1.135477299 | 1     | 0.996 | 1.04E-93  | 7 | 3 |
| HNF4A    | 3.81E-118 | 1.133221365 | 0.56  | 0.158 | 7.39E-114 | 7 | 3 |
| DST      | 7.39E-104 | 1.116475158 | 0.569 | 0.179 | 1.43E-99  | 7 | 3 |
| ABHD11   | 3.92E-129 | 1.109162615 | 0.65  | 0.2   | 7.61E-125 | 7 | 3 |
| CKB      | 1.37E-32  | 1.085714821 | 0.638 | 0.352 | 2.65E-28  | 7 | 3 |
| UFM1     | 2.08E-94  | 1.047094328 | 0.779 | 0.37  | 4.03E-90  | 7 | 3 |
| RNF43    | 2.35E-126 | 1.044026474 | 0.616 | 0.176 | 4.55E-122 | 7 | 3 |
| DDAH2    | 4.23E-77  | 1.030620839 | 0.703 | 0.341 | 8.20E-73  | 7 | 3 |
| LY6G6F-L | 0         | 1.029876556 | 0.442 | 0.014 | 0         | 7 | 3 |
| RND3     | 1.85E-148 | 1.022481604 | 0.554 | 0.124 | 3.58E-144 | 7 | 3 |
| PCK1     | 5.70E-127 | 1.003594438 | 0.375 | 0.063 | 1.11E-122 | 7 | 3 |
| SAP18    | 1.13E-79  | 0.994786393 | 0.888 | 0.62  | 2.19E-75  | 7 | 3 |
| RPS10    | 1.25E-55  | 0.980344505 | 0.96  | 0.956 | 2.42E-51  | 7 | 3 |
| PYGB     | 8.11E-109 | 0.976922822 | 0.569 | 0.171 | 1.57E-104 | 7 | 3 |
| SEC61G   | 8.95E-71  | 0.973470068 | 0.922 | 0.66  | 1.74E-66  | 7 | 3 |
| HSPA1A   | 4.97E-56  | 0.973218914 | 0.656 | 0.291 | 9.63E-52  | 7 | 3 |
| ARHGAP5  | 4.94E-122 | 0.966972765 | 0.65  | 0.203 | 9.59E-118 | 7 | 3 |
| EFNB2    | 4.68E-176 | 0.961097256 | 0.536 | 0.102 | 9.09E-172 | 7 | 3 |
| EFNA1    | 4.62E-118 | 0.959723427 | 0.545 | 0.144 | 8.97E-114 | 7 | 3 |
| HOXB7    | 5.58E-133 | 0.959416119 | 0.638 | 0.186 | 1.08E-128 | 7 | 3 |
| EPS8     | 9.47E-133 | 0.94599125  | 0.645 | 0.184 | 1.84E-128 | 7 | 3 |
| KDELRL2  | 1.94E-60  | 0.93895925  | 0.819 | 0.502 | 3.77E-56  | 7 | 3 |
| SLC6A8   | 1.19E-78  | 0.932893208 | 0.359 | 0.089 | 2.30E-74  | 7 | 3 |
| BRI3     | 5.47E-72  | 0.923715406 | 0.694 | 0.334 | 1.06E-67  | 7 | 3 |
| SELENOP  | 1.76E-142 | 0.914951684 | 0.587 | 0.133 | 3.41E-138 | 7 | 3 |
| SLC44A4  | 4.69E-100 | 0.908902264 | 0.623 | 0.209 | 9.09E-96  | 7 | 3 |
| CHMP5    | 6.46E-64  | 0.907371991 | 0.719 | 0.36  | 1.25E-59  | 7 | 3 |
| MISP     | 1.30E-111 | 0.891032282 | 0.621 | 0.191 | 2.51E-107 | 7 | 3 |
| B4GALT1  | 1.78E-62  | 0.888291917 | 0.549 | 0.214 | 3.45E-58  | 7 | 3 |
| DNAJC15  | 2.11E-69  | 0.871383143 | 0.795 | 0.421 | 4.10E-65  | 7 | 3 |
| JUP      | 4.05E-114 | 0.869154089 | 0.609 | 0.186 | 7.86E-110 | 7 | 3 |
| FABP1    | 8.22E-14  | 0.840502306 | 0.431 | 0.275 | 1.60E-09  | 7 | 3 |
| C6orf132 | 5.31E-130 | 0.834738399 | 0.509 | 0.12  | 1.03E-125 | 7 | 3 |
| YWHAE    | 4.63E-61  | 0.832653254 | 0.85  | 0.545 | 8.99E-57  | 7 | 3 |
| SBDS     | 3.65E-55  | 0.830635649 | 0.721 | 0.39  | 7.07E-51  | 7 | 3 |
| PHKG1    | 5.01E-82  | 0.830207309 | 0.406 | 0.107 | 9.71E-78  | 7 | 3 |
| POMP     | 2.03E-54  | 0.829884067 | 0.875 | 0.655 | 3.94E-50  | 7 | 3 |
| NFIB     | 3.18E-91  | 0.82113204  | 0.527 | 0.164 | 6.16E-87  | 7 | 3 |
| NPC2     | 3.51E-62  | 0.81521268  | 0.848 | 0.51  | 6.80E-58  | 7 | 3 |
| CBWD5    | 1.05E-90  | 0.81352354  | 0.618 | 0.216 | 2.04E-86  | 7 | 3 |
| FAM177A1 | 9.51E-65  | 0.802275827 | 0.759 | 0.383 | 1.85E-60  | 7 | 3 |
| GAPDH    | 1.38E-69  | 0.797252044 | 0.984 | 0.916 | 2.68E-65  | 7 | 3 |

|          |           |             |       |       |           |   |   |
|----------|-----------|-------------|-------|-------|-----------|---|---|
| MRPL57   | 3.99E-62  | 0.790717126 | 0.763 | 0.429 | 7.74E-58  | 7 | 3 |
| TAX1BP3  | 7.23E-79  | 0.790382013 | 0.623 | 0.244 | 1.40E-74  | 7 | 3 |
| C6orf48  | 1.23E-50  | 0.790212469 | 0.781 | 0.482 | 2.39E-46  | 7 | 3 |
| YBX3     | 6.89E-82  | 0.787482835 | 0.75  | 0.332 | 1.34E-77  | 7 | 3 |
| TAX1BP1  | 3.60E-44  | 0.78729468  | 0.812 | 0.543 | 6.98E-40  | 7 | 3 |
| DDR1     | 5.75E-96  | 0.786195688 | 0.54  | 0.167 | 1.12E-91  | 7 | 3 |
| HOXB9    | 1.29E-113 | 0.763960119 | 0.538 | 0.146 | 2.50E-109 | 7 | 3 |
| KRT20    | 8.12E-77  | 0.759894165 | 0.48  | 0.141 | 1.57E-72  | 7 | 3 |
| AMN      | 5.84E-99  | 0.759696487 | 0.52  | 0.144 | 1.13E-94  | 7 | 3 |
| MYO6     | 1.40E-72  | 0.755505333 | 0.636 | 0.253 | 2.72E-68  | 7 | 3 |
| GNAQ     | 9.27E-89  | 0.754617172 | 0.571 | 0.196 | 1.80E-84  | 7 | 3 |
| TMEM45B  | 8.14E-96  | 0.744088386 | 0.6   | 0.194 | 1.58E-91  | 7 | 3 |
| LDLR     | 1.80E-62  | 0.740667473 | 0.473 | 0.168 | 3.49E-58  | 7 | 3 |
| DGKH     | 1.93E-145 | 0.739247482 | 0.496 | 0.097 | 3.74E-141 | 7 | 3 |
| NUDT4    | 2.47E-63  | 0.734432765 | 0.701 | 0.333 | 4.79E-59  | 7 | 3 |
| BRD2     | 7.81E-58  | 0.734369275 | 0.712 | 0.355 | 1.51E-53  | 7 | 3 |
| SLC25A5  | 1.54E-36  | 0.729742436 | 0.864 | 0.617 | 2.99E-32  | 7 | 3 |
| DDIT3    | 1.06E-43  | 0.727704804 | 0.449 | 0.178 | 2.07E-39  | 7 | 3 |
| SPTSSA   | 3.88E-77  | 0.727170967 | 0.661 | 0.268 | 7.53E-73  | 7 | 3 |
| MGST1    | 1.77E-51  | 0.725004247 | 0.625 | 0.286 | 3.43E-47  | 7 | 3 |
| CFDP1    | 7.29E-56  | 0.724978025 | 0.685 | 0.332 | 1.41E-51  | 7 | 3 |
| UBE2R2   | 1.27E-81  | 0.723346223 | 0.598 | 0.223 | 2.47E-77  | 7 | 3 |
| TNRC18   | 1.80E-154 | 0.723217718 | 0.525 | 0.105 | 3.49E-150 | 7 | 3 |
| NDFIP2   | 7.90E-87  | 0.717099493 | 0.616 | 0.223 | 1.53E-82  | 7 | 3 |
| TP53     | 3.80E-105 | 0.712525052 | 0.455 | 0.107 | 7.37E-101 | 7 | 3 |
| HSP90AB1 | 1.48E-35  | 0.711489086 | 0.931 | 0.775 | 2.87E-31  | 7 | 3 |
| ROMO1    | 1.11E-49  | 0.710932161 | 0.833 | 0.511 | 2.16E-45  | 7 | 3 |
| HIST1H2A | 6.84E-76  | 0.710891232 | 0.522 | 0.174 | 1.33E-71  | 7 | 3 |
| STOML2   | 1.33E-51  | 0.709567939 | 0.67  | 0.352 | 2.58E-47  | 7 | 3 |
| SDC4     | 3.61E-62  | 0.69467709  | 0.516 | 0.194 | 7.00E-58  | 7 | 3 |
| KLF3     | 5.57E-73  | 0.69363597  | 0.616 | 0.235 | 1.08E-68  | 7 | 3 |
| TNNC2    | 1.39E-130 | 0.692547508 | 0.379 | 0.063 | 2.70E-126 | 7 | 3 |
| HMGB1    | 2.51E-33  | 0.692178818 | 0.949 | 0.877 | 4.87E-29  | 7 | 3 |
| EZR      | 1.86E-34  | 0.691196042 | 0.752 | 0.458 | 3.60E-30  | 7 | 3 |
| TSTD1    | 1.42E-44  | 0.688473572 | 0.781 | 0.463 | 2.76E-40  | 7 | 3 |
| LAMB3    | 7.12E-100 | 0.687645765 | 0.455 | 0.114 | 1.38E-95  | 7 | 3 |
| TPM4     | 1.72E-41  | 0.68735744  | 0.761 | 0.443 | 3.34E-37  | 7 | 3 |
| SULT2B1  | 2.69E-124 | 0.686252684 | 0.379 | 0.067 | 5.21E-120 | 7 | 3 |
| COMMD6   | 4.19E-49  | 0.685905828 | 0.915 | 0.758 | 8.13E-45  | 7 | 3 |
| MTIF3    | 2.16E-50  | 0.685158693 | 0.688 | 0.362 | 4.18E-46  | 7 | 3 |
| CD2AP    | 1.53E-76  | 0.683876866 | 0.6   | 0.227 | 2.97E-72  | 7 | 3 |
| NEU1     | 7.22E-76  | 0.67610819  | 0.558 | 0.2   | 1.40E-71  | 7 | 3 |
| YIPF3    | 4.02E-65  | 0.675901822 | 0.621 | 0.264 | 7.79E-61  | 7 | 3 |
| BROX     | 6.24E-74  | 0.674192606 | 0.592 | 0.221 | 1.21E-69  | 7 | 3 |
| DYNLRB1  | 7.02E-33  | 0.673654524 | 0.746 | 0.473 | 1.36E-28  | 7 | 3 |
| MUC3A    | 4.66E-112 | 0.669495364 | 0.491 | 0.121 | 9.04E-108 | 7 | 3 |
| RPL8     | 6.46E-53  | 0.668841074 | 0.998 | 0.99  | 1.25E-48  | 7 | 3 |
| RPL7     | 7.57E-36  | 0.667537665 | 0.987 | 0.986 | 1.47E-31  | 7 | 3 |
| MIF      | 1.54E-24  | 0.667330527 | 0.897 | 0.681 | 2.99E-20  | 7 | 3 |
| MLXIPL   | 1.04E-123 | 0.665428304 | 0.368 | 0.064 | 2.02E-119 | 7 | 3 |
| ADM      | 5.95E-76  | 0.663620926 | 0.386 | 0.099 | 1.15E-71  | 7 | 3 |

|           |           |             |       |       |           |   |   |
|-----------|-----------|-------------|-------|-------|-----------|---|---|
| PGRMC1    | 1.98E-49  | 0.663290836 | 0.603 | 0.28  | 3.84E-45  | 7 | 3 |
| CCND1     | 3.21E-55  | 0.660706557 | 0.558 | 0.227 | 6.22E-51  | 7 | 3 |
| INAVA     | 1.10E-107 | 0.660077872 | 0.444 | 0.105 | 2.13E-103 | 7 | 3 |
| CTNND1    | 1.62E-74  | 0.658687728 | 0.605 | 0.234 | 3.14E-70  | 7 | 3 |
| PLGRKT    | 7.74E-68  | 0.65521434  | 0.585 | 0.232 | 1.50E-63  | 7 | 3 |
| HNMT      | 5.67E-66  | 0.652701597 | 0.531 | 0.197 | 1.10E-61  | 7 | 3 |
| SELENOH   | 1.27E-37  | 0.651679089 | 0.853 | 0.622 | 2.47E-33  | 7 | 3 |
| ZFAND5    | 5.17E-55  | 0.648516638 | 0.685 | 0.331 | 1.00E-50  | 7 | 3 |
| CEACAM1   | 1.76E-53  | 0.648192968 | 0.359 | 0.115 | 3.42E-49  | 7 | 3 |
| ACOT13    | 1.34E-57  | 0.645467678 | 0.52  | 0.207 | 2.59E-53  | 7 | 3 |
| EFNA3     | 1.26E-133 | 0.643866455 | 0.411 | 0.074 | 2.44E-129 | 7 | 3 |
| SUGT1     | 1.76E-62  | 0.643033801 | 0.641 | 0.279 | 3.41E-58  | 7 | 3 |
| SUMF2     | 1.17E-49  | 0.642437532 | 0.567 | 0.252 | 2.26E-45  | 7 | 3 |
| AL161431. | 0         | 0.640695944 | 0.342 | 0.009 | 0         | 7 | 3 |
| SPTBN1    | 7.27E-70  | 0.639832661 | 0.612 | 0.238 | 1.41E-65  | 7 | 3 |
| EIF5      | 1.59E-34  | 0.639344576 | 0.754 | 0.48  | 3.09E-30  | 7 | 3 |
| SCIN      | 4.46E-209 | 0.637558237 | 0.35  | 0.032 | 8.65E-205 | 7 | 3 |
| KNOP1     | 4.45E-53  | 0.636353038 | 0.516 | 0.206 | 8.64E-49  | 7 | 3 |
| H2AFJ     | 6.54E-53  | 0.636207203 | 0.728 | 0.368 | 1.27E-48  | 7 | 3 |
| TIMM10    | 1.05E-57  | 0.635830783 | 0.558 | 0.234 | 2.04E-53  | 7 | 3 |
| SLIRP     | 2.22E-38  | 0.633516364 | 0.763 | 0.454 | 4.31E-34  | 7 | 3 |
| HSPH1     | 2.38E-49  | 0.623252825 | 0.641 | 0.317 | 4.61E-45  | 7 | 3 |
| MRPL52    | 4.27E-41  | 0.619896631 | 0.723 | 0.417 | 8.28E-37  | 7 | 3 |
| CYP3A5    | 4.42E-49  | 0.61980055  | 0.493 | 0.202 | 8.58E-45  | 7 | 3 |
| EMP1      | 2.27E-74  | 0.617358872 | 0.312 | 0.07  | 4.40E-70  | 7 | 3 |
| PLOD2     | 5.17E-84  | 0.615688292 | 0.312 | 0.064 | 1.00E-79  | 7 | 3 |
| MALL      | 1.27E-69  | 0.605183847 | 0.458 | 0.14  | 2.47E-65  | 7 | 3 |
| RPL39     | 7.94E-11  | 0.605051607 | 0.993 | 0.991 | 1.54E-06  | 7 | 3 |
| CSNK2B    | 5.72E-41  | 0.604878314 | 0.757 | 0.449 | 1.11E-36  | 7 | 3 |
| PLEC      | 9.82E-58  | 0.603466589 | 0.504 | 0.189 | 1.90E-53  | 7 | 3 |
| MVP       | 1.81E-52  | 0.602212272 | 0.618 | 0.281 | 3.52E-48  | 7 | 3 |
| CALM1     | 7.15E-36  | 0.602091133 | 0.906 | 0.755 | 1.39E-31  | 7 | 3 |
| ATP10B    | 3.90E-62  | 0.599772339 | 0.442 | 0.15  | 7.57E-58  | 7 | 3 |
| MIDN      | 3.69E-41  | 0.59777261  | 0.587 | 0.286 | 7.16E-37  | 7 | 3 |
| NEK3      | 3.77E-108 | 0.596925166 | 0.413 | 0.089 | 7.31E-104 | 7 | 3 |
| MMP24OS   | 9.44E-56  | 0.596081493 | 0.618 | 0.275 | 1.83E-51  | 7 | 3 |
| LAMP1     | 1.33E-36  | 0.592880497 | 0.708 | 0.396 | 2.58E-32  | 7 | 3 |
| HOXB3     | 1.48E-128 | 0.591720945 | 0.406 | 0.074 | 2.88E-124 | 7 | 3 |
| TM9SF2    | 3.55E-51  | 0.588163565 | 0.609 | 0.296 | 6.88E-47  | 7 | 3 |
| STK24     | 9.89E-81  | 0.588074411 | 0.567 | 0.19  | 1.92E-76  | 7 | 3 |
| FOXC1     | 1.38E-302 | 0.584224427 | 0.326 | 0.015 | 2.67E-298 | 7 | 3 |
| MPST      | 1.28E-46  | 0.583968821 | 0.67  | 0.339 | 2.48E-42  | 7 | 3 |
| IGBP1     | 2.27E-42  | 0.582585507 | 0.632 | 0.326 | 4.41E-38  | 7 | 3 |
| ATP5MPL   | 3.74E-34  | 0.57933404  | 0.906 | 0.715 | 7.26E-30  | 7 | 3 |
| TMEM63A   | 1.29E-51  | 0.579174397 | 0.496 | 0.199 | 2.51E-47  | 7 | 3 |
| NUCKS1    | 1.57E-28  | 0.57739598  | 0.741 | 0.486 | 3.05E-24  | 7 | 3 |
| LLGL2     | 1.08E-70  | 0.577388417 | 0.52  | 0.181 | 2.10E-66  | 7 | 3 |
| CAPN1     | 4.53E-39  | 0.573428391 | 0.605 | 0.309 | 8.78E-35  | 7 | 3 |
| ZG16B     | 1.46E-58  | 0.572318598 | 0.478 | 0.173 | 2.83E-54  | 7 | 3 |
| PAPOLA    | 1.71E-36  | 0.57042397  | 0.786 | 0.517 | 3.32E-32  | 7 | 3 |
| ERO1A     | 2.39E-53  | 0.569375317 | 0.556 | 0.231 | 4.63E-49  | 7 | 3 |

|            |           |             |       |       |           |   |   |
|------------|-----------|-------------|-------|-------|-----------|---|---|
| GSKIP      | 1.39E-77  | 0.564898417 | 0.536 | 0.175 | 2.70E-73  | 7 | 3 |
| RAB4A      | 1.48E-40  | 0.564347248 | 0.618 | 0.327 | 2.87E-36  | 7 | 3 |
| IRS2       | 2.62E-92  | 0.564278176 | 0.475 | 0.126 | 5.08E-88  | 7 | 3 |
| CBWD1      | 3.24E-53  | 0.564173276 | 0.58  | 0.257 | 6.28E-49  | 7 | 3 |
| FARP1      | 7.62E-170 | 0.56396556  | 0.404 | 0.055 | 1.48E-165 | 7 | 3 |
| LINC01133  | 1.36E-54  | 0.563825548 | 0.344 | 0.104 | 2.63E-50  | 7 | 3 |
| INTS6      | 2.66E-49  | 0.561273815 | 0.536 | 0.22  | 5.16E-45  | 7 | 3 |
| C6orf222   | 6.88E-144 | 0.561189965 | 0.342 | 0.046 | 1.33E-139 | 7 | 3 |
| MAPK13     | 3.70E-47  | 0.560992418 | 0.516 | 0.23  | 7.17E-43  | 7 | 3 |
| SERPINE2   | 3.15E-163 | 0.557830295 | 0.353 | 0.042 | 6.11E-159 | 7 | 3 |
| TPI1       | 3.94E-27  | 0.557726908 | 0.906 | 0.72  | 7.65E-23  | 7 | 3 |
| IFT172     | 1.70E-55  | 0.556749926 | 0.46  | 0.168 | 3.29E-51  | 7 | 3 |
| ANG        | 2.26E-59  | 0.555518327 | 0.44  | 0.151 | 4.38E-55  | 7 | 3 |
| PLS1       | 4.72E-57  | 0.554629088 | 0.473 | 0.172 | 9.16E-53  | 7 | 3 |
| SLC40A1    | 3.79E-46  | 0.553719765 | 0.438 | 0.173 | 7.36E-42  | 7 | 3 |
| SLC39A4    | 8.69E-50  | 0.553532223 | 0.58  | 0.254 | 1.69E-45  | 7 | 3 |
| TSPAN6     | 2.74E-63  | 0.551657711 | 0.493 | 0.177 | 5.31E-59  | 7 | 3 |
| SMC5       | 1.52E-65  | 0.5512726   | 0.578 | 0.221 | 2.96E-61  | 7 | 3 |
| GDF15      | 1.38E-63  | 0.550395497 | 0.502 | 0.168 | 2.68E-59  | 7 | 3 |
| MACC1      | 2.25E-71  | 0.546267526 | 0.384 | 0.105 | 4.37E-67  | 7 | 3 |
| EGLN3      | 2.29E-38  | 0.546027057 | 0.33  | 0.12  | 4.44E-34  | 7 | 3 |
| RIOK3      | 2.76E-58  | 0.545337078 | 0.533 | 0.206 | 5.36E-54  | 7 | 3 |
| PKP2       | 8.91E-74  | 0.544283208 | 0.46  | 0.142 | 1.73E-69  | 7 | 3 |
| EIF3B      | 9.66E-64  | 0.542470255 | 0.507 | 0.184 | 1.87E-59  | 7 | 3 |
| PRPF6      | 1.85E-59  | 0.541982375 | 0.598 | 0.249 | 3.60E-55  | 7 | 3 |
| TMEM14C    | 1.94E-40  | 0.541927276 | 0.737 | 0.416 | 3.76E-36  | 7 | 3 |
| NUDT15     | 4.14E-84  | 0.539340608 | 0.406 | 0.104 | 8.03E-80  | 7 | 3 |
| AC103702.2 | 1.42E-52  | 0.538097865 | 0.498 | 0.192 | 2.76E-48  | 7 | 3 |
| EIF6       | 1.48E-38  | 0.537860472 | 0.741 | 0.417 | 2.86E-34  | 7 | 3 |
| TOMM20     | 6.44E-36  | 0.53734566  | 0.746 | 0.466 | 1.25E-31  | 7 | 3 |
| VPS51      | 2.53E-49  | 0.536926843 | 0.549 | 0.246 | 4.91E-45  | 7 | 3 |
| GUK1       | 1.70E-28  | 0.535728576 | 0.882 | 0.681 | 3.30E-24  | 7 | 3 |
| TM4SF5     | 2.08E-125 | 0.534233546 | 0.342 | 0.053 | 4.03E-121 | 7 | 3 |
| BAIAP2L1   | 1.37E-72  | 0.529963002 | 0.415 | 0.119 | 2.65E-68  | 7 | 3 |
| ALG5       | 1.65E-41  | 0.529922444 | 0.587 | 0.288 | 3.20E-37  | 7 | 3 |
| PRR15      | 3.75E-79  | 0.524329106 | 0.44  | 0.126 | 7.28E-75  | 7 | 3 |
| DMAC1      | 3.96E-37  | 0.523819142 | 0.638 | 0.334 | 7.68E-33  | 7 | 3 |
| AKAP1      | 7.85E-69  | 0.520951014 | 0.489 | 0.163 | 1.52E-64  | 7 | 3 |
| MAPK3      | 1.74E-72  | 0.520902488 | 0.496 | 0.161 | 3.38E-68  | 7 | 3 |
| DSC2       | 5.40E-45  | 0.519653841 | 0.5   | 0.214 | 1.05E-40  | 7 | 3 |
| CYB5B      | 2.50E-38  | 0.519040152 | 0.598 | 0.304 | 4.85E-34  | 7 | 3 |
| DNAJA1     | 2.36E-25  | 0.518630002 | 0.75  | 0.515 | 4.58E-21  | 7 | 3 |
| ATP6V1D    | 1.92E-46  | 0.515622933 | 0.531 | 0.23  | 3.73E-42  | 7 | 3 |
| SUN1       | 1.29E-64  | 0.51492591  | 0.444 | 0.143 | 2.50E-60  | 7 | 3 |
| PAWR       | 2.15E-47  | 0.512946379 | 0.556 | 0.243 | 4.17E-43  | 7 | 3 |
| CAPN8      | 1.29E-86  | 0.512456062 | 0.364 | 0.083 | 2.50E-82  | 7 | 3 |
| AK3        | 5.03E-50  | 0.511926342 | 0.603 | 0.264 | 9.76E-46  | 7 | 3 |
| KCNK1      | 3.29E-106 | 0.511565131 | 0.391 | 0.08  | 6.38E-102 | 7 | 3 |
| EPPK1      | 6.05E-76  | 0.511557795 | 0.346 | 0.084 | 1.17E-71  | 7 | 3 |
| LSM5       | 2.12E-25  | 0.509800921 | 0.721 | 0.46  | 4.11E-21  | 7 | 3 |
| EBAG9      | 8.04E-56  | 0.50915078  | 0.518 | 0.199 | 1.56E-51  | 7 | 3 |

|          |           |             |       |       |           |   |   |
|----------|-----------|-------------|-------|-------|-----------|---|---|
| ERGIC3   | 2.07E-32  | 0.509037293 | 0.75  | 0.472 | 4.02E-28  | 7 | 3 |
| PIP5K1B  | 3.39E-78  | 0.50866769  | 0.402 | 0.107 | 6.57E-74  | 7 | 3 |
| BLCAP    | 3.45E-43  | 0.508141574 | 0.487 | 0.209 | 6.69E-39  | 7 | 3 |
| BCL2L1   | 6.06E-53  | 0.506595019 | 0.449 | 0.162 | 1.18E-48  | 7 | 3 |
| SQLE     | 1.68E-19  | 0.504807061 | 0.379 | 0.202 | 3.26E-15  | 7 | 3 |
| MMP7     | 0         | 2.978511109 | 0.833 | 0.099 | 0         | 9 | 4 |
| ANPEP    | 0         | 2.348930215 | 0.694 | 0.056 | 0         | 9 | 4 |
| SCD      | 2.28E-196 | 1.960886151 | 0.74  | 0.172 | 4.42E-192 | 9 | 4 |
| C8orf33  | 8.48E-181 | 1.915141918 | 0.798 | 0.229 | 1.64E-176 | 9 | 4 |
| PLAC8    | 7.20E-163 | 1.729548907 | 0.823 | 0.23  | 1.40E-158 | 9 | 4 |
| MYL9     | 2.46E-180 | 1.622682486 | 0.336 | 0.032 | 4.78E-176 | 9 | 4 |
| LGALS2   | 7.55E-221 | 1.563112328 | 0.679 | 0.115 | 1.46E-216 | 9 | 4 |
| FDPS     | 4.88E-112 | 1.528351773 | 0.801 | 0.335 | 9.46E-108 | 9 | 4 |
| PKM      | 2.04E-141 | 1.45972352  | 0.985 | 0.565 | 3.96E-137 | 9 | 4 |
| PGK1     | 5.58E-113 | 1.379840578 | 0.967 | 0.586 | 1.08E-108 | 9 | 4 |
| FAM13A   | 3.80E-136 | 1.364311003 | 0.561 | 0.129 | 7.38E-132 | 9 | 4 |
| ENO1     | 1.21E-104 | 1.342980425 | 0.955 | 0.639 | 2.35E-100 | 9 | 4 |
| PTGR1    | 2.63E-237 | 1.313139897 | 0.699 | 0.122 | 5.11E-233 | 9 | 4 |
| PLA2G2A  | 4.40E-66  | 1.292805079 | 0.447 | 0.13  | 8.54E-62  | 9 | 4 |
| SLC11A2  | 3.15E-136 | 1.290876238 | 0.566 | 0.131 | 6.11E-132 | 9 | 4 |
| IDH2     | 2.01E-111 | 1.285231963 | 0.884 | 0.421 | 3.90E-107 | 9 | 4 |
| C15orf48 | 5.11E-139 | 1.258435719 | 0.917 | 0.342 | 9.91E-135 | 9 | 4 |
| GLO1     | 1.54E-128 | 1.253683059 | 0.828 | 0.315 | 2.98E-124 | 9 | 4 |
| MRLN     | 0         | 1.240142208 | 0.513 | 0.012 | 0         | 9 | 4 |
| RBP2     | 0         | 1.22339191  | 0.333 | 0.006 | 0         | 9 | 4 |
| P4HB     | 1.40E-97  | 1.220328232 | 0.924 | 0.509 | 2.71E-93  | 9 | 4 |
| TUBA1B   | 9.89E-35  | 1.209928089 | 0.811 | 0.531 | 1.92E-30  | 9 | 4 |
| FBXO2    | 1.44E-285 | 1.208445853 | 0.566 | 0.059 | 2.80E-281 | 9 | 4 |
| EBP      | 2.45E-110 | 1.195431657 | 0.75  | 0.279 | 4.75E-106 | 9 | 4 |
| CFD      | 1.03E-150 | 1.183755252 | 0.604 | 0.126 | 2.00E-146 | 9 | 4 |
| PGAM1    | 4.94E-103 | 1.155850566 | 0.919 | 0.482 | 9.58E-99  | 9 | 4 |
| JPT1     | 1.60E-104 | 1.152185783 | 0.914 | 0.418 | 3.10E-100 | 9 | 4 |
| RAB5IF   | 1.57E-95  | 1.151658613 | 0.879 | 0.418 | 3.04E-91  | 9 | 4 |
| PLBD1    | 7.56E-164 | 1.146993064 | 0.758 | 0.21  | 1.47E-159 | 9 | 4 |
| GPX4     | 2.91E-93  | 1.141737901 | 0.965 | 0.602 | 5.64E-89  | 9 | 4 |
| ACAT2    | 8.83E-135 | 1.138754917 | 0.601 | 0.146 | 1.71E-130 | 9 | 4 |
| ATP5ME   | 2.20E-87  | 1.11823384  | 0.965 | 0.683 | 4.26E-83  | 9 | 4 |
| MYL12B   | 1.04E-109 | 1.11619835  | 0.99  | 0.765 | 2.01E-105 | 9 | 4 |
| PCLAF    | 2.70E-103 | 1.109031603 | 0.399 | 0.08  | 5.23E-99  | 9 | 4 |
| SMIM24   | 2.01E-126 | 1.093926169 | 0.5   | 0.105 | 3.91E-122 | 9 | 4 |
| TSPAN3   | 1.03E-126 | 1.081578257 | 0.808 | 0.286 | 1.99E-122 | 9 | 4 |
| H2AFZ    | 2.49E-46  | 1.07797151  | 0.909 | 0.652 | 4.84E-42  | 9 | 4 |
| EIF2S2   | 7.10E-83  | 1.073414933 | 0.902 | 0.521 | 1.38E-78  | 9 | 4 |
| FTL      | 4.64E-109 | 1.056547588 | 0.995 | 0.967 | 9.00E-105 | 9 | 4 |
| RARRES1  | 6.31E-132 | 1.046376189 | 0.391 | 0.062 | 1.22E-127 | 9 | 4 |
| BSG      | 5.33E-80  | 1.041534948 | 0.927 | 0.518 | 1.03E-75  | 9 | 4 |
| PDXK     | 2.74E-136 | 1.040704879 | 0.77  | 0.244 | 5.32E-132 | 9 | 4 |
| NAA20    | 2.25E-47  | 1.037710733 | 0.619 | 0.281 | 4.36E-43  | 9 | 4 |
| TDP2     | 1.08E-107 | 1.033936189 | 0.753 | 0.265 | 2.09E-103 | 9 | 4 |
| QPRT     | 1.30E-112 | 1.02844026  | 0.707 | 0.232 | 2.53E-108 | 9 | 4 |
| DDT      | 4.66E-104 | 1.02687446  | 0.912 | 0.443 | 9.04E-100 | 9 | 4 |

|          |           |             |       |       |           |   |   |
|----------|-----------|-------------|-------|-------|-----------|---|---|
| EIF5A    | 3.71E-87  | 1.018549361 | 0.864 | 0.403 | 7.19E-83  | 9 | 4 |
| PPARG    | 2.54E-196 | 0.998527773 | 0.621 | 0.113 | 4.92E-192 | 9 | 4 |
| HSD17B2  | 5.25E-156 | 0.997110996 | 0.333 | 0.037 | 1.02E-151 | 9 | 4 |
| GSTM3    | 4.09E-186 | 0.987048709 | 0.581 | 0.101 | 7.92E-182 | 9 | 4 |
| MSMO1    | 5.16E-122 | 0.987009912 | 0.598 | 0.153 | 1.00E-117 | 9 | 4 |
| RAB11A   | 1.91E-102 | 0.965780752 | 0.904 | 0.398 | 3.70E-98  | 9 | 4 |
| PRELID1  | 7.14E-90  | 0.962517794 | 0.957 | 0.568 | 1.38E-85  | 9 | 4 |
| ZNF706   | 6.74E-81  | 0.954621656 | 0.912 | 0.521 | 1.31E-76  | 9 | 4 |
| GPI      | 8.30E-122 | 0.946561027 | 0.811 | 0.281 | 1.61E-117 | 9 | 4 |
| CNIH4    | 2.37E-118 | 0.945528089 | 0.826 | 0.301 | 4.60E-114 | 9 | 4 |
| PRELID3B | 4.61E-96  | 0.942709658 | 0.768 | 0.293 | 8.95E-92  | 9 | 4 |
| C4orf3   | 2.60E-64  | 0.935499247 | 0.932 | 0.632 | 5.05E-60  | 9 | 4 |
| AKR1B10  | 0         | 0.93309979  | 0.48  | 0.024 | 0         | 9 | 4 |
| C17orf78 | 0         | 0.931022223 | 0.323 | 0.004 | 0         | 9 | 4 |
| GCHFR    | 3.59E-122 | 0.929591507 | 0.687 | 0.195 | 6.97E-118 | 9 | 4 |
| IDH1     | 1.45E-129 | 0.925233293 | 0.753 | 0.232 | 2.82E-125 | 9 | 4 |
| NDUFB9   | 2.31E-72  | 0.923226855 | 0.914 | 0.528 | 4.48E-68  | 9 | 4 |
| CISD1    | 7.96E-107 | 0.898812012 | 0.763 | 0.271 | 1.54E-102 | 9 | 4 |
| PPP1R14D | 9.13E-183 | 0.895215589 | 0.619 | 0.115 | 1.77E-178 | 9 | 4 |
| RNF186   | 1.43E-92  | 0.892709215 | 0.432 | 0.101 | 2.77E-88  | 9 | 4 |
| SPINT1   | 2.14E-104 | 0.887037052 | 0.712 | 0.236 | 4.14E-100 | 9 | 4 |
| PRR15L   | 2.63E-134 | 0.866943209 | 0.654 | 0.168 | 5.10E-130 | 9 | 4 |
| AKAP7    | 3.26E-168 | 0.857608903 | 0.515 | 0.083 | 6.33E-164 | 9 | 4 |
| RANBP1   | 2.16E-40  | 0.855306441 | 0.79  | 0.457 | 4.19E-36  | 9 | 4 |
| GGH      | 4.80E-97  | 0.847072958 | 0.591 | 0.177 | 9.31E-93  | 9 | 4 |
| TSPO     | 2.14E-73  | 0.843457182 | 0.947 | 0.538 | 4.14E-69  | 9 | 4 |
| COMT     | 1.36E-93  | 0.839391648 | 0.803 | 0.305 | 2.64E-89  | 9 | 4 |
| HSD17B12 | 1.30E-85  | 0.834516611 | 0.773 | 0.307 | 2.52E-81  | 9 | 4 |
| YWHAB    | 3.98E-52  | 0.834142793 | 0.932 | 0.652 | 7.72E-48  | 9 | 4 |
| RPLP0    | 1.13E-66  | 0.833051967 | 0.98  | 0.935 | 2.20E-62  | 9 | 4 |
| MUC17    | 0         | 0.830719908 | 0.414 | 0.024 | 0         | 9 | 4 |
| PPP2R1A  | 6.26E-86  | 0.816498945 | 0.828 | 0.345 | 1.21E-81  | 9 | 4 |
| ANKRD9   | 3.02E-198 | 0.815738314 | 0.568 | 0.09  | 5.87E-194 | 9 | 4 |
| NDUFA6   | 1.22E-79  | 0.815361469 | 0.854 | 0.396 | 2.38E-75  | 9 | 4 |
| CHMP2B   | 3.57E-95  | 0.810139596 | 0.775 | 0.297 | 6.93E-91  | 9 | 4 |
| RABL6    | 2.41E-97  | 0.808817676 | 0.687 | 0.234 | 4.68E-93  | 9 | 4 |
| TIMM13   | 1.41E-70  | 0.801630718 | 0.831 | 0.398 | 2.74E-66  | 9 | 4 |
| CEBPD    | 1.82E-79  | 0.801454524 | 0.692 | 0.259 | 3.53E-75  | 9 | 4 |
| ANKRD37  | 1.07E-26  | 0.801374956 | 0.313 | 0.128 | 2.07E-22  | 9 | 4 |
| SERPINB1 | 2.18E-61  | 0.800459834 | 0.871 | 0.465 | 4.23E-57  | 9 | 4 |
| CHP1     | 1.78E-78  | 0.79405392  | 0.727 | 0.29  | 3.45E-74  | 9 | 4 |
| ACTG1    | 9.91E-54  | 0.791906342 | 0.99  | 0.91  | 1.92E-49  | 9 | 4 |
| LACTB2   | 1.51E-139 | 0.78590143  | 0.646 | 0.158 | 2.92E-135 | 9 | 4 |
| YBX1     | 5.88E-49  | 0.785309026 | 0.98  | 0.84  | 1.14E-44  | 9 | 4 |
| LSM4     | 2.12E-61  | 0.784397048 | 0.79  | 0.391 | 4.11E-57  | 9 | 4 |
| CCNG1    | 3.49E-76  | 0.783068446 | 0.78  | 0.333 | 6.76E-72  | 9 | 4 |
| MVD      | 1.09E-105 | 0.781231534 | 0.525 | 0.132 | 2.12E-101 | 9 | 4 |
| PSMB5    | 8.42E-87  | 0.772670297 | 0.826 | 0.346 | 1.63E-82  | 9 | 4 |
| PHB      | 3.52E-71  | 0.771812135 | 0.818 | 0.377 | 6.82E-67  | 9 | 4 |
| AKR1C3   | 1.10E-62  | 0.771104093 | 0.465 | 0.149 | 2.14E-58  | 9 | 4 |
| TMPRSS2  | 3.25E-108 | 0.770607614 | 0.571 | 0.152 | 6.31E-104 | 9 | 4 |



|            |           |             |       |       |           |   |   |
|------------|-----------|-------------|-------|-------|-----------|---|---|
| IDI1       | 3.14E-51  | 0.768096623 | 0.621 | 0.276 | 6.09E-47  | 9 | 4 |
| DHCR7      | 3.12E-107 | 0.760615758 | 0.429 | 0.09  | 6.06E-103 | 9 | 4 |
| SLC16A3    | 7.39E-82  | 0.756119481 | 0.624 | 0.21  | 1.43E-77  | 9 | 4 |
| PSAT1      | 2.51E-167 | 0.755280609 | 0.419 | 0.056 | 4.87E-163 | 9 | 4 |
| WDR1       | 4.36E-75  | 0.749737559 | 0.831 | 0.375 | 8.45E-71  | 9 | 4 |
| HMGCS1     | 1.14E-79  | 0.747656792 | 0.5   | 0.147 | 2.21E-75  | 9 | 4 |
| ATP5F1E    | 1.94E-34  | 0.746548268 | 0.992 | 0.927 | 3.77E-30  | 9 | 4 |
| GCNT3      | 1.52E-133 | 0.744584451 | 0.399 | 0.064 | 2.95E-129 | 9 | 4 |
| MTCH2      | 6.29E-77  | 0.743568999 | 0.755 | 0.313 | 1.22E-72  | 9 | 4 |
| CFL1       | 5.24E-72  | 0.73870815  | 1     | 0.913 | 1.02E-67  | 9 | 4 |
| PRDX6      | 2.47E-33  | 0.736398351 | 0.78  | 0.431 | 4.79E-29  | 9 | 4 |
| SDCBP      | 3.46E-62  | 0.736296129 | 0.896 | 0.462 | 6.72E-58  | 9 | 4 |
| GSTM4      | 4.11E-160 | 0.73515632  | 0.487 | 0.079 | 7.98E-156 | 9 | 4 |
| SMAGP      | 4.62E-100 | 0.731989602 | 0.697 | 0.228 | 8.96E-96  | 9 | 4 |
| CHMP4C     | 1.73E-144 | 0.728588076 | 0.619 | 0.141 | 3.35E-140 | 9 | 4 |
| C10orf99   | 1.75E-92  | 0.728575388 | 0.485 | 0.122 | 3.39E-88  | 9 | 4 |
| TPMT       | 2.19E-132 | 0.726982776 | 0.705 | 0.187 | 4.26E-128 | 9 | 4 |
| CPS1       | 0         | 0.725128218 | 0.336 | 0.011 | 0         | 9 | 4 |
| UQCR10     | 2.83E-50  | 0.722909545 | 0.967 | 0.616 | 5.49E-46  | 9 | 4 |
| CEBPG      | 9.34E-96  | 0.722707324 | 0.654 | 0.209 | 1.81E-91  | 9 | 4 |
| CYP2S1     | 2.62E-172 | 0.721059042 | 0.439 | 0.06  | 5.08E-168 | 9 | 4 |
| F3         | 3.81E-82  | 0.720554293 | 0.343 | 0.072 | 7.38E-78  | 9 | 4 |
| SMS        | 8.56E-69  | 0.719029711 | 0.788 | 0.355 | 1.66E-64  | 9 | 4 |
| FLNB       | 2.58E-70  | 0.717212524 | 0.485 | 0.155 | 5.00E-66  | 9 | 4 |
| NME1       | 7.22E-48  | 0.715471626 | 0.621 | 0.289 | 1.40E-43  | 9 | 4 |
| RHEB       | 2.10E-59  | 0.715147709 | 0.818 | 0.417 | 4.07E-55  | 9 | 4 |
| CKS2       | 1.11E-36  | 0.711435874 | 0.538 | 0.254 | 2.16E-32  | 9 | 4 |
| PMEPA1     | 3.77E-51  | 0.711381079 | 0.49  | 0.184 | 7.31E-47  | 9 | 4 |
| UQCRC2     | 1.20E-52  | 0.710487711 | 0.843 | 0.442 | 2.33E-48  | 9 | 4 |
| GNAS       | 2.69E-53  | 0.708309906 | 0.912 | 0.556 | 5.22E-49  | 9 | 4 |
| STAU1      | 1.35E-69  | 0.705294196 | 0.78  | 0.337 | 2.62E-65  | 9 | 4 |
| CCT5       | 9.37E-62  | 0.705283449 | 0.76  | 0.348 | 1.82E-57  | 9 | 4 |
| RPN2       | 3.86E-51  | 0.703139257 | 0.785 | 0.412 | 7.48E-47  | 9 | 4 |
| AHCY       | 2.69E-62  | 0.701739308 | 0.568 | 0.219 | 5.23E-58  | 9 | 4 |
| PDIA3      | 3.77E-39  | 0.701729153 | 0.886 | 0.599 | 7.31E-35  | 9 | 4 |
| CALM2      | 7.96E-37  | 0.700503767 | 0.965 | 0.834 | 1.54E-32  | 9 | 4 |
| ELOC       | 3.60E-59  | 0.694959052 | 0.861 | 0.454 | 6.99E-55  | 9 | 4 |
| AL121761.2 | 7.24E-240 | 0.6946598   | 0.346 | 0.023 | 1.40E-235 | 9 | 4 |
| MRPL13     | 4.18E-73  | 0.692666408 | 0.783 | 0.325 | 8.10E-69  | 9 | 4 |
| PRELID2    | 7.51E-160 | 0.689702404 | 0.535 | 0.097 | 1.46E-155 | 9 | 4 |
| MTHFD2     | 5.22E-60  | 0.687569721 | 0.596 | 0.232 | 1.01E-55  | 9 | 4 |
| EIF3H      | 4.07E-52  | 0.679835263 | 0.939 | 0.623 | 7.90E-48  | 9 | 4 |
| NANS       | 2.35E-72  | 0.679513603 | 0.76  | 0.32  | 4.56E-68  | 9 | 4 |
| USP53      | 1.05E-56  | 0.674743031 | 0.472 | 0.166 | 2.04E-52  | 9 | 4 |
| PSME2      | 1.21E-29  | 0.672985779 | 0.856 | 0.56  | 2.34E-25  | 9 | 4 |
| ATP5PD     | 2.89E-46  | 0.669650741 | 0.861 | 0.487 | 5.60E-42  | 9 | 4 |
| CIB1       | 2.46E-54  | 0.668933119 | 0.944 | 0.568 | 4.76E-50  | 9 | 4 |
| CTNNA1     | 1.11E-77  | 0.66888176  | 0.722 | 0.279 | 2.16E-73  | 9 | 4 |
| SLC25A39   | 1.90E-65  | 0.667673443 | 0.699 | 0.293 | 3.69E-61  | 9 | 4 |
| TYMS       | 1.00E-165 | 0.667393484 | 0.386 | 0.047 | 1.95E-161 | 9 | 4 |
| GIPC1      | 7.75E-90  | 0.663972425 | 0.667 | 0.223 | 1.50E-85  | 9 | 4 |

|           |           |             |       |       |           |   |   |
|-----------|-----------|-------------|-------|-------|-----------|---|---|
| NPM1      | 1.09E-28  | 0.66364111  | 0.96  | 0.862 | 2.12E-24  | 9 | 4 |
| SLC35A3   | 6.50E-82  | 0.662388872 | 0.682 | 0.249 | 1.26E-77  | 9 | 4 |
| ATP5F1D   | 1.03E-41  | 0.658525343 | 0.944 | 0.635 | 2.00E-37  | 9 | 4 |
| MYL6      | 8.71E-53  | 0.658330788 | 0.99  | 0.909 | 1.69E-48  | 9 | 4 |
| TSPAN15   | 1.85E-108 | 0.651686756 | 0.591 | 0.159 | 3.60E-104 | 9 | 4 |
| MZT2A     | 7.31E-57  | 0.650439057 | 0.907 | 0.485 | 1.42E-52  | 9 | 4 |
| CISD2     | 1.35E-72  | 0.649878274 | 0.745 | 0.304 | 2.61E-68  | 9 | 4 |
| PRR13     | 1.01E-43  | 0.646534683 | 0.96  | 0.623 | 1.97E-39  | 9 | 4 |
| DDIT4     | 8.79E-26  | 0.644914114 | 0.54  | 0.277 | 1.70E-21  | 9 | 4 |
| PLCB3     | 2.57E-140 | 0.644021788 | 0.525 | 0.103 | 4.99E-136 | 9 | 4 |
| C3orf85   | 5.13E-242 | 0.643471832 | 0.374 | 0.028 | 9.94E-238 | 9 | 4 |
| CMAS      | 5.10E-80  | 0.642887471 | 0.644 | 0.221 | 9.90E-76  | 9 | 4 |
| ETFB      | 1.68E-67  | 0.642668113 | 0.851 | 0.391 | 3.26E-63  | 9 | 4 |
| HIGD1A    | 6.14E-69  | 0.642287173 | 0.753 | 0.31  | 1.19E-64  | 9 | 4 |
| SDCBP2    | 8.83E-105 | 0.641489759 | 0.457 | 0.099 | 1.71E-100 | 9 | 4 |
| TUBB      | 6.74E-24  | 0.638673302 | 0.775 | 0.477 | 1.31E-19  | 9 | 4 |
| INSIG1    | 1.83E-54  | 0.637369526 | 0.525 | 0.192 | 3.56E-50  | 9 | 4 |
| ADRM1     | 4.86E-55  | 0.636828203 | 0.763 | 0.352 | 9.42E-51  | 9 | 4 |
| UBE2V2    | 2.61E-58  | 0.633937716 | 0.73  | 0.326 | 5.07E-54  | 9 | 4 |
| FKBP4     | 4.86E-91  | 0.633856802 | 0.646 | 0.205 | 9.42E-87  | 9 | 4 |
| TMEM97    | 4.09E-119 | 0.632635943 | 0.48  | 0.101 | 7.93E-115 | 9 | 4 |
| PTGES3    | 6.05E-35  | 0.632001328 | 0.927 | 0.664 | 1.17E-30  | 9 | 4 |
| LYZ       | 4.25E-91  | 0.631916412 | 0.891 | 0.391 | 8.24E-87  | 9 | 4 |
| ME1       | 1.45E-168 | 0.630609256 | 0.452 | 0.065 | 2.82E-164 | 9 | 4 |
| HEPH      | 9.51E-85  | 0.629331493 | 0.485 | 0.133 | 1.84E-80  | 9 | 4 |
| PHPT1     | 2.25E-56  | 0.62890611  | 0.859 | 0.447 | 4.37E-52  | 9 | 4 |
| OLA1      | 2.19E-60  | 0.627630133 | 0.725 | 0.315 | 4.24E-56  | 9 | 4 |
| UQCR11    | 1.26E-44  | 0.625662737 | 0.972 | 0.731 | 2.44E-40  | 9 | 4 |
| SLC25A1   | 2.66E-106 | 0.625510009 | 0.558 | 0.143 | 5.17E-102 | 9 | 4 |
| HSD17B11  | 1.25E-52  | 0.622863339 | 0.795 | 0.401 | 2.42E-48  | 9 | 4 |
| TMBIM6    | 6.68E-32  | 0.620969492 | 0.899 | 0.708 | 1.30E-27  | 9 | 4 |
| CHCHD10   | 3.15E-45  | 0.620956916 | 0.886 | 0.497 | 6.11E-41  | 9 | 4 |
| ERG28     | 3.28E-78  | 0.619737212 | 0.596 | 0.197 | 6.35E-74  | 9 | 4 |
| PRSS22    | 1.03E-94  | 0.618121941 | 0.414 | 0.09  | 2.00E-90  | 9 | 4 |
| TECR      | 3.97E-57  | 0.618091511 | 0.768 | 0.37  | 7.70E-53  | 9 | 4 |
| GSTO1     | 7.02E-51  | 0.617955436 | 0.793 | 0.393 | 1.36E-46  | 9 | 4 |
| KPNA2     | 5.76E-39  | 0.616673396 | 0.331 | 0.111 | 1.12E-34  | 9 | 4 |
| AP3S1     | 5.74E-49  | 0.61565608  | 0.841 | 0.419 | 1.11E-44  | 9 | 4 |
| PPP1R16A  | 1.17E-89  | 0.61495926  | 0.588 | 0.179 | 2.26E-85  | 9 | 4 |
| CYP2W1    | 6.22E-86  | 0.614325479 | 0.333 | 0.065 | 1.21E-81  | 9 | 4 |
| GALNT1    | 3.23E-69  | 0.613395778 | 0.591 | 0.211 | 6.26E-65  | 9 | 4 |
| RPS27L    | 1.41E-39  | 0.611386865 | 0.949 | 0.635 | 2.73E-35  | 9 | 4 |
| ADI1      | 1.10E-57  | 0.610284505 | 0.684 | 0.298 | 2.13E-53  | 9 | 4 |
| YWHAZ     | 2.48E-42  | 0.610234306 | 0.947 | 0.706 | 4.80E-38  | 9 | 4 |
| AL133453. | 2.31E-100 | 0.609423775 | 0.412 | 0.083 | 4.49E-96  | 9 | 4 |
| HDHD3     | 1.29E-77  | 0.608313316 | 0.583 | 0.194 | 2.50E-73  | 9 | 4 |
| DYNC1H2   | 2.71E-52  | 0.603322612 | 0.788 | 0.379 | 5.25E-48  | 9 | 4 |
| GID8      | 2.99E-79  | 0.602749955 | 0.692 | 0.247 | 5.80E-75  | 9 | 4 |
| PDIA6     | 1.19E-33  | 0.601877969 | 0.841 | 0.552 | 2.30E-29  | 9 | 4 |
| ALKBH7    | 8.84E-57  | 0.599947636 | 0.705 | 0.315 | 1.72E-52  | 9 | 4 |
| CHCHD3    | 7.79E-78  | 0.599653398 | 0.604 | 0.203 | 1.51E-73  | 9 | 4 |

|           |           |             |       |       |           |   |   |
|-----------|-----------|-------------|-------|-------|-----------|---|---|
| ATF4      | 5.57E-41  | 0.596675429 | 0.758 | 0.404 | 1.08E-36  | 9 | 4 |
| GTF3C6    | 7.11E-52  | 0.596189083 | 0.732 | 0.35  | 1.38E-47  | 9 | 4 |
| CENPV     | 8.88E-96  | 0.595619027 | 0.593 | 0.172 | 1.72E-91  | 9 | 4 |
| SRI       | 3.98E-45  | 0.594636053 | 0.922 | 0.522 | 7.71E-41  | 9 | 4 |
| ANAPC11   | 6.01E-50  | 0.593621012 | 0.864 | 0.462 | 1.17E-45  | 9 | 4 |
| HDAC1     | 3.16E-57  | 0.59144366  | 0.753 | 0.343 | 6.14E-53  | 9 | 4 |
| SEPHS2    | 7.52E-53  | 0.591153977 | 0.679 | 0.298 | 1.46E-48  | 9 | 4 |
| TMCC1     | 8.52E-133 | 0.590487194 | 0.437 | 0.075 | 1.65E-128 | 9 | 4 |
| SLC2A1    | 1.36E-66  | 0.589682576 | 0.404 | 0.111 | 2.64E-62  | 9 | 4 |
| CDS1      | 3.67E-99  | 0.589437152 | 0.523 | 0.135 | 7.12E-95  | 9 | 4 |
| TMEM92    | 2.30E-159 | 0.586630238 | 0.379 | 0.048 | 4.46E-155 | 9 | 4 |
| PFKP      | 5.96E-110 | 0.585757043 | 0.561 | 0.137 | 1.16E-105 | 9 | 4 |
| ACOT7     | 1.51E-99  | 0.584323391 | 0.497 | 0.121 | 2.93E-95  | 9 | 4 |
| SNORC     | 8.10E-116 | 0.580294508 | 0.482 | 0.102 | 1.57E-111 | 9 | 4 |
| STXBP6    | 2.89E-72  | 0.580075095 | 0.528 | 0.169 | 5.60E-68  | 9 | 4 |
| CCT6A     | 8.74E-46  | 0.579217074 | 0.783 | 0.402 | 1.70E-41  | 9 | 4 |
| HMG2      | 8.32E-15  | 0.57886359  | 0.886 | 0.683 | 1.61E-10  | 9 | 4 |
| FDFT1     | 1.52E-54  | 0.578025003 | 0.616 | 0.257 | 2.96E-50  | 9 | 4 |
| PFKL      | 3.98E-67  | 0.577877411 | 0.669 | 0.262 | 7.72E-63  | 9 | 4 |
| WDR45B    | 4.10E-66  | 0.576663982 | 0.586 | 0.21  | 7.94E-62  | 9 | 4 |
| PXMP2     | 9.00E-90  | 0.576239878 | 0.533 | 0.148 | 1.75E-85  | 9 | 4 |
| ETFA      | 5.23E-63  | 0.575526045 | 0.763 | 0.333 | 1.01E-58  | 9 | 4 |
| ERRFI1    | 1.39E-41  | 0.575306934 | 0.328 | 0.105 | 2.69E-37  | 9 | 4 |
| EIF3E     | 1.26E-30  | 0.572446844 | 0.942 | 0.75  | 2.44E-26  | 9 | 4 |
| HSPA9     | 3.43E-45  | 0.572130223 | 0.717 | 0.352 | 6.66E-41  | 9 | 4 |
| TCEAL9    | 6.83E-66  | 0.571043476 | 0.515 | 0.173 | 1.33E-61  | 9 | 4 |
| GPA33     | 9.79E-91  | 0.567568301 | 0.475 | 0.12  | 1.90E-86  | 9 | 4 |
| PON2      | 1.50E-73  | 0.566171601 | 0.634 | 0.22  | 2.90E-69  | 9 | 4 |
| SRSF9     | 1.86E-44  | 0.565264432 | 0.876 | 0.502 | 3.60E-40  | 9 | 4 |
| CMPK1     | 1.15E-38  | 0.564122562 | 0.922 | 0.575 | 2.23E-34  | 9 | 4 |
| BID       | 9.57E-68  | 0.562655665 | 0.616 | 0.226 | 1.86E-63  | 9 | 4 |
| AC020656. | 1.72E-63  | 0.560867888 | 0.477 | 0.151 | 3.33E-59  | 9 | 4 |
| TK1       | 1.86E-83  | 0.560642429 | 0.316 | 0.06  | 3.60E-79  | 9 | 4 |
| HEBP1     | 2.40E-84  | 0.560163497 | 0.492 | 0.136 | 4.66E-80  | 9 | 4 |
| MORF4L2   | 4.33E-49  | 0.560042579 | 0.775 | 0.385 | 8.40E-45  | 9 | 4 |
| DDAH1     | 5.21E-96  | 0.558140143 | 0.553 | 0.152 | 1.01E-91  | 9 | 4 |
| OAT       | 6.71E-34  | 0.557459972 | 0.465 | 0.201 | 1.30E-29  | 9 | 4 |
| UQCRB     | 5.60E-38  | 0.556192631 | 0.985 | 0.867 | 1.09E-33  | 9 | 4 |
| ARF4      | 1.32E-48  | 0.552922323 | 0.823 | 0.42  | 2.55E-44  | 9 | 4 |
| SLC52A2   | 1.31E-63  | 0.551597777 | 0.593 | 0.221 | 2.54E-59  | 9 | 4 |
| NDUFV2    | 1.85E-46  | 0.549599059 | 0.846 | 0.452 | 3.60E-42  | 9 | 4 |
| CISD3     | 1.81E-60  | 0.549475082 | 0.735 | 0.308 | 3.51E-56  | 9 | 4 |
| LAP3      | 1.75E-63  | 0.54896755  | 0.568 | 0.196 | 3.39E-59  | 9 | 4 |
| DNM2      | 4.66E-76  | 0.546739839 | 0.621 | 0.211 | 9.03E-72  | 9 | 4 |
| FBP1      | 4.29E-59  | 0.546601674 | 0.503 | 0.173 | 8.32E-55  | 9 | 4 |
| SNRPD1    | 2.79E-28  | 0.545750094 | 0.722 | 0.431 | 5.41E-24  | 9 | 4 |
| TRAM1     | 3.07E-43  | 0.540488225 | 0.823 | 0.434 | 5.95E-39  | 9 | 4 |
| SELENOS   | 8.92E-37  | 0.53809626  | 0.755 | 0.414 | 1.73E-32  | 9 | 4 |
| CLDN15    | 3.09E-142 | 0.53806959  | 0.442 | 0.071 | 6.00E-138 | 9 | 4 |
| TM7SF2    | 1.14E-77  | 0.535422712 | 0.437 | 0.112 | 2.22E-73  | 9 | 4 |
| ATP1B3    | 2.39E-47  | 0.533350085 | 0.783 | 0.401 | 4.63E-43  | 9 | 4 |

|         |           |             |       |       |           |    |   |
|---------|-----------|-------------|-------|-------|-----------|----|---|
| REEP3   | 1.47E-67  | 0.533167266 | 0.621 | 0.226 | 2.85E-63  | 9  | 4 |
| P4HA1   | 1.38E-76  | 0.531443955 | 0.52  | 0.154 | 2.67E-72  | 9  | 4 |
| RTN3    | 2.24E-48  | 0.530399528 | 0.71  | 0.327 | 4.34E-44  | 9  | 4 |
| NETO2   | 5.89E-143 | 0.530170634 | 0.437 | 0.07  | 1.14E-138 | 9  | 4 |
| PAICS   | 4.66E-77  | 0.529761838 | 0.52  | 0.156 | 9.04E-73  | 9  | 4 |
| TFG     | 2.08E-56  | 0.529717322 | 0.641 | 0.267 | 4.04E-52  | 9  | 4 |
| GLRX5   | 1.20E-66  | 0.529580476 | 0.629 | 0.234 | 2.33E-62  | 9  | 4 |
| ATP5MC1 | 4.89E-27  | 0.52867841  | 0.737 | 0.453 | 9.49E-23  | 9  | 4 |
| DHRS11  | 8.45E-131 | 0.528652554 | 0.371 | 0.055 | 1.64E-126 | 9  | 4 |
| RAB1A   | 1.92E-44  | 0.528579488 | 0.788 | 0.406 | 3.73E-40  | 9  | 4 |
| CANX    | 5.46E-35  | 0.5283753   | 0.823 | 0.48  | 1.06E-30  | 9  | 4 |
| CRB3    | 1.72E-88  | 0.527320104 | 0.48  | 0.125 | 3.34E-84  | 9  | 4 |
| WDR34   | 7.18E-71  | 0.527291486 | 0.457 | 0.131 | 1.39E-66  | 9  | 4 |
| NUDT14  | 2.07E-76  | 0.525829948 | 0.593 | 0.189 | 4.02E-72  | 9  | 4 |
| PYCR1   | 4.95E-76  | 0.525433464 | 0.487 | 0.145 | 9.60E-72  | 9  | 4 |
| CYCS    | 3.40E-24  | 0.524381872 | 0.894 | 0.629 | 6.59E-20  | 9  | 4 |
| UGDH    | 1.68E-89  | 0.523348294 | 0.548 | 0.153 | 3.26E-85  | 9  | 4 |
| PPIB    | 3.64E-25  | 0.523138784 | 0.891 | 0.637 | 7.07E-21  | 9  | 4 |
| MDH1    | 8.55E-46  | 0.522196638 | 0.715 | 0.333 | 1.66E-41  | 9  | 4 |
| DCTPP1  | 4.15E-47  | 0.520212751 | 0.626 | 0.272 | 8.05E-43  | 9  | 4 |
| RPS4Y1  | 3.20E-29  | 0.518565156 | 0.768 | 0.431 | 6.20E-25  | 9  | 4 |
| CBR1    | 7.68E-41  | 0.517675797 | 0.457 | 0.181 | 1.49E-36  | 9  | 4 |
| SORD    | 3.31E-74  | 0.51698456  | 0.429 | 0.117 | 6.42E-70  | 9  | 4 |
| PSMA3   | 4.00E-44  | 0.515524845 | 0.758 | 0.376 | 7.77E-40  | 9  | 4 |
| ERH     | 2.44E-29  | 0.515058997 | 0.851 | 0.553 | 4.74E-25  | 9  | 4 |
| HNRNPAB | 2.15E-42  | 0.51380618  | 0.755 | 0.375 | 4.17E-38  | 9  | 4 |
| CENPX   | 1.64E-47  | 0.513610867 | 0.631 | 0.272 | 3.17E-43  | 9  | 4 |
| ENC1    | 4.86E-67  | 0.513009686 | 0.452 | 0.132 | 9.43E-63  | 9  | 4 |
| RCN1    | 1.44E-60  | 0.512629754 | 0.591 | 0.226 | 2.79E-56  | 9  | 4 |
| NUTF2   | 1.07E-57  | 0.512527209 | 0.71  | 0.307 | 2.08E-53  | 9  | 4 |
| ABHD12  | 5.69E-68  | 0.512254655 | 0.513 | 0.163 | 1.10E-63  | 9  | 4 |
| FCGRT   | 1.00E-40  | 0.512145475 | 0.76  | 0.386 | 1.94E-36  | 9  | 4 |
| SNRPA1  | 6.99E-73  | 0.510337273 | 0.616 | 0.211 | 1.36E-68  | 9  | 4 |
| DPM1    | 5.97E-55  | 0.510029391 | 0.71  | 0.301 | 1.16E-50  | 9  | 4 |
| ACAA2   | 3.23E-60  | 0.508645804 | 0.614 | 0.232 | 6.27E-56  | 9  | 4 |
| LSM3    | 8.86E-33  | 0.508499371 | 0.813 | 0.461 | 1.72E-28  | 9  | 4 |
| CBLC    | 3.31E-87  | 0.507777533 | 0.47  | 0.119 | 6.43E-83  | 9  | 4 |
| IL18    | 1.31E-79  | 0.507329502 | 0.419 | 0.103 | 2.54E-75  | 9  | 4 |
| MYDGF   | 5.75E-38  | 0.505723602 | 0.818 | 0.449 | 1.11E-33  | 9  | 4 |
| UQCRFS1 | 3.19E-36  | 0.505321183 | 0.806 | 0.448 | 6.19E-32  | 9  | 4 |
| ARF1    | 7.80E-35  | 0.505166482 | 0.889 | 0.562 | 1.51E-30  | 9  | 4 |
| LRRC59  | 1.25E-57  | 0.504998977 | 0.606 | 0.239 | 2.42E-53  | 9  | 4 |
| IMPDH2  | 1.43E-46  | 0.504482776 | 0.664 | 0.303 | 2.78E-42  | 9  | 4 |
| CAPZA2  | 4.03E-43  | 0.504078722 | 0.831 | 0.434 | 7.82E-39  | 9  | 4 |
| CTNNB1  | 4.31E-42  | 0.50362591  | 0.77  | 0.386 | 8.36E-38  | 9  | 4 |
| TBX3    | 1.83E-87  | 0.501841179 | 0.361 | 0.074 | 3.56E-83  | 9  | 4 |
| DNPH1   | 3.19E-48  | 0.501340535 | 0.737 | 0.346 | 6.19E-44  | 9  | 4 |
| REEP6   | 5.10E-102 | 0.500882732 | 0.341 | 0.058 | 9.89E-98  | 9  | 4 |
| CAST    | 2.79E-33  | 0.500604986 | 0.833 | 0.485 | 5.42E-29  | 9  | 4 |
| NOTUM   | 0         | 2.654140167 | 0.582 | 0.01  | 0         | 10 | 5 |
| NKD1    | 0         | 2.165277502 | 0.703 | 0.035 | 0         | 10 | 5 |

|          |           |             |       |       |           |    |   |
|----------|-----------|-------------|-------|-------|-----------|----|---|
| ASPSR1   | 5.40E-157 | 1.875686036 | 0.558 | 0.105 | 1.05E-152 | 10 | 5 |
| BAMBI    | 0         | 1.783375387 | 0.568 | 0.05  | 0         | 10 | 5 |
| TNFRSF11 | 0         | 1.783297288 | 0.461 | 0.025 | 0         | 10 | 5 |
| PROM1    | 0         | 1.535163954 | 0.732 | 0.078 | 0         | 10 | 5 |
| MAP3K20  | 0         | 1.51874903  | 0.811 | 0.097 | 0         | 10 | 5 |
| ALDH1A1  | 1.13E-239 | 1.469247237 | 0.534 | 0.062 | 2.19E-235 | 10 | 5 |
| PCP4     | 0         | 1.344137745 | 0.353 | 0.003 | 0         | 10 | 5 |
| AXIN2    | 0         | 1.314745407 | 0.787 | 0.079 | 0         | 10 | 5 |
| EPHB2    | 1.34E-241 | 1.244077748 | 0.763 | 0.144 | 2.60E-237 | 10 | 5 |
| CEMIP    | 0         | 1.238901968 | 0.653 | 0.035 | 0         | 10 | 5 |
| SP5      | 0         | 1.220470569 | 0.563 | 0.038 | 0         | 10 | 5 |
| MYO10    | 1.09E-238 | 1.216648595 | 0.803 | 0.168 | 2.11E-234 | 10 | 5 |
| SLC1A5   | 4.34E-51  | 1.210791847 | 0.487 | 0.189 | 8.42E-47  | 10 | 5 |
| DPEP1    | 1.30E-122 | 1.180662678 | 0.463 | 0.09  | 2.53E-118 | 10 | 5 |
| GADD45A  | 3.73E-168 | 1.178387327 | 0.695 | 0.152 | 7.24E-164 | 10 | 5 |
| ID3      | 1.64E-72  | 1.134012859 | 0.639 | 0.231 | 3.17E-68  | 10 | 5 |
| ABHD2    | 6.05E-193 | 1.078059657 | 0.739 | 0.156 | 1.17E-188 | 10 | 5 |
| ZFP36L1  | 1.57E-86  | 1.074437002 | 0.926 | 0.553 | 3.05E-82  | 10 | 5 |
| TCEAL4   | 2.43E-213 | 1.052209245 | 0.753 | 0.145 | 4.71E-209 | 10 | 5 |
| RFK      | 3.76E-155 | 1.047172595 | 0.75  | 0.196 | 7.29E-151 | 10 | 5 |
| GTF2I    | 1.58E-145 | 1.039635393 | 0.911 | 0.317 | 3.07E-141 | 10 | 5 |
| NDUFA4   | 3.62E-109 | 1.031736054 | 0.992 | 0.734 | 7.02E-105 | 10 | 5 |
| SERINC5  | 4.11E-135 | 1.022153211 | 0.8   | 0.247 | 7.98E-131 | 10 | 5 |
| PTK7     | 0         | 1.02069037  | 0.611 | 0.047 | 0         | 10 | 5 |
| ACTN1    | 6.39E-169 | 1.017414052 | 0.797 | 0.206 | 1.24E-164 | 10 | 5 |
| BST2     | 3.22E-52  | 1.00741988  | 0.768 | 0.414 | 6.25E-48  | 10 | 5 |
| TGIF1    | 1.16E-126 | 0.981534375 | 0.829 | 0.277 | 2.25E-122 | 10 | 5 |
| CDCA7    | 3.30E-189 | 0.964219519 | 0.687 | 0.134 | 6.39E-185 | 10 | 5 |
| LAPTM4A  | 5.65E-90  | 0.93316655  | 0.968 | 0.505 | 1.10E-85  | 10 | 5 |
| RCN2     | 1.38E-108 | 0.930533481 | 0.813 | 0.295 | 2.67E-104 | 10 | 5 |
| SORBS2   | 1.17E-285 | 0.929394121 | 0.626 | 0.074 | 2.26E-281 | 10 | 5 |
| WFS1     | 0         | 0.91323428  | 0.542 | 0.033 | 0         | 10 | 5 |
| SBSPON   | 1.42E-285 | 0.898903947 | 0.532 | 0.05  | 2.75E-281 | 10 | 5 |
| TSPAN5   | 9.95E-219 | 0.892885628 | 0.621 | 0.091 | 1.93E-214 | 10 | 5 |
| IGFBP4   | 1.89E-81  | 0.891998521 | 0.532 | 0.153 | 3.67E-77  | 10 | 5 |
| ARL4A    | 4.96E-112 | 0.88637154  | 0.832 | 0.283 | 9.61E-108 | 10 | 5 |
| MRFAP1   | 7.07E-109 | 0.883269983 | 0.9   | 0.367 | 1.37E-104 | 10 | 5 |
| HACD3    | 8.19E-172 | 0.877453935 | 0.761 | 0.178 | 1.59E-167 | 10 | 5 |
| SESN1    | 8.81E-192 | 0.861664176 | 0.616 | 0.103 | 1.71E-187 | 10 | 5 |
| CTSH     | 1.25E-123 | 0.860923591 | 0.787 | 0.249 | 2.42E-119 | 10 | 5 |
| DAAM1    | 6.92E-178 | 0.852490334 | 0.753 | 0.165 | 1.34E-173 | 10 | 5 |
| SCG5     | 4.12E-291 | 0.845869475 | 0.429 | 0.029 | 7.99E-287 | 10 | 5 |
| FBXO21   | 2.22E-192 | 0.84461795  | 0.708 | 0.137 | 4.31E-188 | 10 | 5 |
| ZNF503   | 4.92E-264 | 0.843717068 | 0.532 | 0.054 | 9.54E-260 | 10 | 5 |
| C9orf16  | 1.09E-61  | 0.837736569 | 0.918 | 0.514 | 2.11E-57  | 10 | 5 |
| CD81     | 2.23E-129 | 0.833118232 | 0.821 | 0.246 | 4.33E-125 | 10 | 5 |
| IRF2BP2  | 3.39E-101 | 0.830622668 | 0.861 | 0.339 | 6.57E-97  | 10 | 5 |
| PDZD8    | 1.22E-165 | 0.827373582 | 0.75  | 0.178 | 2.37E-161 | 10 | 5 |
| TTR      | 6.29E-235 | 0.826840366 | 0.358 | 0.024 | 1.22E-230 | 10 | 5 |
| HDAC2    | 2.12E-103 | 0.825371101 | 0.842 | 0.326 | 4.12E-99  | 10 | 5 |
| MAP2K6   | 1.80E-174 | 0.818109015 | 0.632 | 0.119 | 3.50E-170 | 10 | 5 |

|          |           |             |       |       |           |    |   |
|----------|-----------|-------------|-------|-------|-----------|----|---|
| ZNF704   | 2.01E-243 | 0.817609545 | 0.553 | 0.067 | 3.89E-239 | 10 | 5 |
| OBP2B    | 0         | 0.8154339   | 0.376 | 0.005 | 0         | 10 | 5 |
| CRNDE    | 2.18E-227 | 0.811940625 | 0.597 | 0.083 | 4.23E-223 | 10 | 5 |
| APEX1    | 9.99E-106 | 0.811905887 | 0.837 | 0.31  | 1.94E-101 | 10 | 5 |
| HYAL2    | 3.02E-155 | 0.80664067  | 0.529 | 0.093 | 5.86E-151 | 10 | 5 |
| CEMIP2   | 1.26E-155 | 0.798871472 | 0.729 | 0.171 | 2.44E-151 | 10 | 5 |
| TMEM205  | 3.55E-124 | 0.79792255  | 0.818 | 0.265 | 6.88E-120 | 10 | 5 |
| H2AFY2   | 0         | 0.794095165 | 0.626 | 0.063 | 0         | 10 | 5 |
| PATJ     | 1.10E-157 | 0.789413191 | 0.692 | 0.157 | 2.14E-153 | 10 | 5 |
| TMED9    | 5.61E-73  | 0.787926507 | 0.926 | 0.479 | 1.09E-68  | 10 | 5 |
| RHOB     | 9.37E-54  | 0.78653091  | 0.776 | 0.364 | 1.82E-49  | 10 | 5 |
| SEZ6L2   | 5.19E-199 | 0.786207581 | 0.595 | 0.096 | 1.01E-194 | 10 | 5 |
| MSX2     | 0         | 0.780624262 | 0.445 | 0.027 | 0         | 10 | 5 |
| LGMN     | 1.24E-149 | 0.771824838 | 0.697 | 0.165 | 2.40E-145 | 10 | 5 |
| SULT1E1  | 3.93E-277 | 0.770705744 | 0.303 | 0.012 | 7.63E-273 | 10 | 5 |
| SNTB1    | 2.28E-246 | 0.766678709 | 0.513 | 0.054 | 4.41E-242 | 10 | 5 |
| SKP1     | 4.37E-74  | 0.766016969 | 0.992 | 0.766 | 8.47E-70  | 10 | 5 |
| QDPR     | 1.34E-158 | 0.763401848 | 0.687 | 0.154 | 2.60E-154 | 10 | 5 |
| ATP9A    | 1.11E-215 | 0.753484678 | 0.668 | 0.11  | 2.15E-211 | 10 | 5 |
| ADH5     | 2.26E-101 | 0.751598786 | 0.797 | 0.282 | 4.38E-97  | 10 | 5 |
| NMNAT3   | 0         | 0.751326722 | 0.545 | 0.03  | 0         | 10 | 5 |
| NORAD    | 2.04E-93  | 0.744563077 | 0.834 | 0.318 | 3.97E-89  | 10 | 5 |
| SUPT4H1  | 6.32E-103 | 0.738539462 | 0.813 | 0.275 | 1.23E-98  | 10 | 5 |
| CHKA     | 1.02E-187 | 0.734276746 | 0.595 | 0.1   | 1.97E-183 | 10 | 5 |
| DEPTOR   | 1.08E-246 | 0.729852516 | 0.532 | 0.06  | 2.09E-242 | 10 | 5 |
| LGR5     | 0         | 0.727131259 | 0.458 | 0.031 | 0         | 10 | 5 |
| TOX3     | 3.42E-165 | 0.721936578 | 0.603 | 0.116 | 6.63E-161 | 10 | 5 |
| LRPAP1   | 1.33E-90  | 0.710191219 | 0.816 | 0.312 | 2.58E-86  | 10 | 5 |
| FILIP1L  | 3.76E-191 | 0.707629749 | 0.382 | 0.038 | 7.29E-187 | 10 | 5 |
| LAMB1    | 5.25E-274 | 0.700491419 | 0.542 | 0.054 | 1.02E-269 | 10 | 5 |
| ROBO2    | 0         | 0.700358324 | 0.489 | 0.02  | 0         | 10 | 5 |
| EPHB3    | 1.85E-176 | 0.698905971 | 0.521 | 0.079 | 3.59E-172 | 10 | 5 |
| VPS28    | 1.36E-65  | 0.697392822 | 0.918 | 0.502 | 2.64E-61  | 10 | 5 |
| OLFML3   | 2.99E-280 | 0.696589534 | 0.311 | 0.013 | 5.79E-276 | 10 | 5 |
| ENAH     | 2.87E-216 | 0.690488859 | 0.608 | 0.089 | 5.57E-212 | 10 | 5 |
| VGLL4    | 6.37E-138 | 0.688979521 | 0.708 | 0.175 | 1.23E-133 | 10 | 5 |
| CSNK1A1  | 2.64E-70  | 0.686463859 | 0.932 | 0.478 | 5.13E-66  | 10 | 5 |
| VWA1     | 5.03E-150 | 0.685228952 | 0.487 | 0.081 | 9.76E-146 | 10 | 5 |
| DHRS7    | 5.19E-73  | 0.680196451 | 0.853 | 0.371 | 1.01E-68  | 10 | 5 |
| TMEM9    | 4.28E-159 | 0.679680036 | 0.589 | 0.113 | 8.30E-155 | 10 | 5 |
| PODXL2   | 4.33E-170 | 0.677047806 | 0.571 | 0.1   | 8.40E-166 | 10 | 5 |
| TTC3     | 1.40E-65  | 0.675509973 | 0.921 | 0.484 | 2.72E-61  | 10 | 5 |
| MFSD10   | 1.80E-105 | 0.672254771 | 0.795 | 0.258 | 3.50E-101 | 10 | 5 |
| MFAP2    | 0         | 0.671735912 | 0.432 | 0.017 | 0         | 10 | 5 |
| HOOK2    | 9.99E-122 | 0.670194473 | 0.671 | 0.179 | 1.94E-117 | 10 | 5 |
| DMKN     | 3.69E-213 | 0.669223002 | 0.468 | 0.052 | 7.17E-209 | 10 | 5 |
| DAD1     | 1.60E-65  | 0.668340674 | 0.966 | 0.553 | 3.10E-61  | 10 | 5 |
| CCT2     | 8.98E-72  | 0.665654463 | 0.832 | 0.361 | 1.74E-67  | 10 | 5 |
| CDK6     | 5.27E-121 | 0.665139874 | 0.671 | 0.172 | 1.02E-116 | 10 | 5 |
| PLPP1    | 1.50E-141 | 0.662279191 | 0.482 | 0.081 | 2.90E-137 | 10 | 5 |
| C19orf48 | 2.27E-106 | 0.662065504 | 0.595 | 0.156 | 4.39E-102 | 10 | 5 |

|         |           |             |       |       |           |    |   |
|---------|-----------|-------------|-------|-------|-----------|----|---|
| SCML1   | 2.12E-169 | 0.6609466   | 0.553 | 0.093 | 4.11E-165 | 10 | 5 |
| TAF7    | 9.84E-55  | 0.656351452 | 0.882 | 0.511 | 1.91E-50  | 10 | 5 |
| CDK4    | 1.39E-106 | 0.653299119 | 0.755 | 0.239 | 2.71E-102 | 10 | 5 |
| GLUL    | 1.29E-87  | 0.649371177 | 0.832 | 0.321 | 2.51E-83  | 10 | 5 |
| GMPR    | 3.98E-117 | 0.645323559 | 0.355 | 0.055 | 7.71E-113 | 10 | 5 |
| BZW2    | 2.55E-109 | 0.645261085 | 0.724 | 0.218 | 4.94E-105 | 10 | 5 |
| CTSV    | 1.51E-172 | 0.644748981 | 0.382 | 0.042 | 2.92E-168 | 10 | 5 |
| TMC4    | 2.14E-143 | 0.644574625 | 0.613 | 0.133 | 4.16E-139 | 10 | 5 |
| CAPS    | 2.05E-214 | 0.643099375 | 0.439 | 0.044 | 3.98E-210 | 10 | 5 |
| GSTA4   | 6.24E-233 | 0.643095283 | 0.489 | 0.052 | 1.21E-228 | 10 | 5 |
| PHF14   | 4.89E-83  | 0.642931502 | 0.839 | 0.327 | 9.49E-79  | 10 | 5 |
| CTSZ    | 3.04E-67  | 0.641694285 | 0.687 | 0.265 | 5.90E-63  | 10 | 5 |
| SCOC    | 7.52E-101 | 0.64000014  | 0.755 | 0.247 | 1.46E-96  | 10 | 5 |
| MGAT5   | 3.02E-152 | 0.639447188 | 0.568 | 0.105 | 5.87E-148 | 10 | 5 |
| EXOSC4  | 2.57E-122 | 0.636949636 | 0.668 | 0.175 | 4.98E-118 | 10 | 5 |
| SRP14   | 4.90E-56  | 0.634001694 | 1     | 0.836 | 9.50E-52  | 10 | 5 |
| PLEKHA5 | 1.15E-163 | 0.633963213 | 0.584 | 0.107 | 2.24E-159 | 10 | 5 |
| ZNRF3   | 5.79E-277 | 0.632665962 | 0.492 | 0.043 | 1.12E-272 | 10 | 5 |
| MSI2    | 4.89E-123 | 0.63011506  | 0.75  | 0.209 | 9.49E-119 | 10 | 5 |
| NR2F1   | 3.87E-297 | 0.629030978 | 0.461 | 0.033 | 7.51E-293 | 10 | 5 |
| SCARB2  | 8.61E-102 | 0.626907243 | 0.734 | 0.233 | 1.67E-97  | 10 | 5 |
| ILF2    | 3.36E-74  | 0.626841198 | 0.821 | 0.336 | 6.53E-70  | 10 | 5 |
| PPFIBP1 | 4.29E-145 | 0.624173103 | 0.445 | 0.069 | 8.32E-141 | 10 | 5 |
| ABCC3   | 3.42E-82  | 0.620781415 | 0.584 | 0.18  | 6.63E-78  | 10 | 5 |
| ACSL5   | 1.81E-83  | 0.616949707 | 0.692 | 0.234 | 3.51E-79  | 10 | 5 |
| SLC5A1  | 1.74E-224 | 0.615408385 | 0.495 | 0.056 | 3.38E-220 | 10 | 5 |
| CACNA1D | 8.64E-285 | 0.614733253 | 0.474 | 0.038 | 1.68E-280 | 10 | 5 |
| PAM     | 5.42E-145 | 0.614064425 | 0.484 | 0.081 | 1.05E-140 | 10 | 5 |
| STRAP   | 1.30E-75  | 0.609639502 | 0.805 | 0.332 | 2.53E-71  | 10 | 5 |
| SQSTM1  | 1.12E-59  | 0.608461484 | 0.879 | 0.435 | 2.18E-55  | 10 | 5 |
| EPHX1   | 2.83E-163 | 0.607816188 | 0.453 | 0.065 | 5.49E-159 | 10 | 5 |
| MEX3A   | 0         | 0.606713982 | 0.442 | 0.027 | 0         | 10 | 5 |
| SET     | 4.60E-47  | 0.605484825 | 0.966 | 0.62  | 8.92E-43  | 10 | 5 |
| CDC34   | 3.88E-174 | 0.60547588  | 0.529 | 0.082 | 7.53E-170 | 10 | 5 |
| UBE2E3  | 2.14E-106 | 0.603015803 | 0.747 | 0.229 | 4.16E-102 | 10 | 5 |
| SMTN    | 1.75E-197 | 0.601064514 | 0.524 | 0.071 | 3.40E-193 | 10 | 5 |
| WLS     | 1.46E-172 | 0.599457269 | 0.524 | 0.082 | 2.84E-168 | 10 | 5 |
| PIGT    | 1.22E-74  | 0.598972794 | 0.763 | 0.296 | 2.36E-70  | 10 | 5 |
| SDC1    | 4.77E-92  | 0.598238611 | 0.632 | 0.194 | 9.26E-88  | 10 | 5 |
| MAOB    | 0         | 0.597644689 | 0.303 | 0.006 | 0         | 10 | 5 |
| PTK2    | 1.81E-153 | 0.594336285 | 0.642 | 0.133 | 3.51E-149 | 10 | 5 |
| GSTA1   | 6.81E-160 | 0.592143627 | 0.326 | 0.033 | 1.32E-155 | 10 | 5 |
| SCAND1  | 2.52E-59  | 0.591931066 | 0.913 | 0.46  | 4.89E-55  | 10 | 5 |
| PDGFA   | 3.30E-151 | 0.591918062 | 0.458 | 0.07  | 6.40E-147 | 10 | 5 |
| ALDH1B1 | 1.86E-121 | 0.590613796 | 0.492 | 0.099 | 3.61E-117 | 10 | 5 |
| PCMTD1  | 7.44E-76  | 0.589637849 | 0.758 | 0.284 | 1.44E-71  | 10 | 5 |
| TRABD2A | 2.68E-89  | 0.589138626 | 0.584 | 0.169 | 5.20E-85  | 10 | 5 |
| GDE1    | 8.59E-91  | 0.587390369 | 0.726 | 0.242 | 1.67E-86  | 10 | 5 |
| SMARCA4 | 2.87E-108 | 0.58684951  | 0.755 | 0.228 | 5.56E-104 | 10 | 5 |
| TMEM59  | 7.24E-45  | 0.583580383 | 0.966 | 0.688 | 1.40E-40  | 10 | 5 |
| MANSC1  | 4.46E-172 | 0.583073303 | 0.505 | 0.077 | 8.64E-168 | 10 | 5 |

|          |           |             |       |       |           |    |   |
|----------|-----------|-------------|-------|-------|-----------|----|---|
| SYNJ2BP  | 2.79E-110 | 0.581848044 | 0.671 | 0.183 | 5.40E-106 | 10 | 5 |
| ARSE     | 1.83E-141 | 0.581766375 | 0.529 | 0.1   | 3.54E-137 | 10 | 5 |
| NET1     | 3.83E-95  | 0.58059949  | 0.661 | 0.199 | 7.43E-91  | 10 | 5 |
| TMED3    | 3.17E-88  | 0.579001846 | 0.771 | 0.267 | 6.14E-84  | 10 | 5 |
| STT3B    | 3.50E-71  | 0.577933314 | 0.753 | 0.3   | 6.80E-67  | 10 | 5 |
| PUF60    | 1.35E-80  | 0.575191216 | 0.816 | 0.311 | 2.62E-76  | 10 | 5 |
| ATP6V0B  | 6.74E-49  | 0.574972977 | 0.905 | 0.487 | 1.31E-44  | 10 | 5 |
| AFDN     | 8.39E-95  | 0.574964695 | 0.65  | 0.194 | 1.63E-90  | 10 | 5 |
| SMAD5    | 4.62E-116 | 0.573626887 | 0.597 | 0.145 | 8.96E-112 | 10 | 5 |
| TSN      | 1.26E-107 | 0.572438299 | 0.684 | 0.19  | 2.45E-103 | 10 | 5 |
| XRCC5    | 3.52E-57  | 0.571316329 | 0.895 | 0.448 | 6.83E-53  | 10 | 5 |
| GRINA    | 1.21E-106 | 0.569172975 | 0.624 | 0.165 | 2.36E-102 | 10 | 5 |
| LEPROT   | 3.56E-76  | 0.568745324 | 0.776 | 0.292 | 6.90E-72  | 10 | 5 |
| SHTN1    | 3.26E-118 | 0.567864838 | 0.529 | 0.117 | 6.32E-114 | 10 | 5 |
| HSP90B1  | 3.16E-44  | 0.567622393 | 0.974 | 0.635 | 6.14E-40  | 10 | 5 |
| ANXA5    | 9.72E-62  | 0.567480817 | 0.842 | 0.38  | 1.89E-57  | 10 | 5 |
| REPIN1   | 3.82E-89  | 0.566665564 | 0.689 | 0.224 | 7.42E-85  | 10 | 5 |
| MPZL1    | 2.72E-103 | 0.565518749 | 0.658 | 0.188 | 5.27E-99  | 10 | 5 |
| KDM1A    | 3.99E-134 | 0.563642818 | 0.566 | 0.118 | 7.74E-130 | 10 | 5 |
| SSB      | 7.72E-57  | 0.562960646 | 0.887 | 0.438 | 1.50E-52  | 10 | 5 |
| PAIP1    | 1.02E-82  | 0.561662886 | 0.774 | 0.283 | 1.98E-78  | 10 | 5 |
| SCCPDH   | 9.79E-101 | 0.559211618 | 0.661 | 0.188 | 1.90E-96  | 10 | 5 |
| TRAF4    | 3.04E-116 | 0.557793358 | 0.647 | 0.166 | 5.89E-112 | 10 | 5 |
| RNF128   | 1.45E-153 | 0.557491159 | 0.511 | 0.086 | 2.81E-149 | 10 | 5 |
| ARL2     | 3.07E-84  | 0.557488697 | 0.761 | 0.266 | 5.96E-80  | 10 | 5 |
| LPP      | 8.67E-76  | 0.557240192 | 0.774 | 0.289 | 1.68E-71  | 10 | 5 |
| DACH1    | 9.88E-133 | 0.556267427 | 0.437 | 0.073 | 1.92E-128 | 10 | 5 |
| POLR2I   | 1.18E-61  | 0.556075649 | 0.818 | 0.368 | 2.29E-57  | 10 | 5 |
| KLHL23   | 1.10E-122 | 0.555167924 | 0.518 | 0.107 | 2.14E-118 | 10 | 5 |
| SLC6A6   | 3.42E-97  | 0.554719512 | 0.455 | 0.1   | 6.64E-93  | 10 | 5 |
| FAM84B   | 1.26E-182 | 0.553327257 | 0.542 | 0.081 | 2.44E-178 | 10 | 5 |
| PCDHB14  | 3.74E-291 | 0.550665115 | 0.426 | 0.028 | 7.25E-287 | 10 | 5 |
| PGM2L1   | 3.76E-79  | 0.550150767 | 0.508 | 0.143 | 7.29E-75  | 10 | 5 |
| GPAA1    | 6.13E-86  | 0.548630786 | 0.729 | 0.247 | 1.19E-81  | 10 | 5 |
| GAS6     | 6.83E-86  | 0.547474236 | 0.561 | 0.16  | 1.32E-81  | 10 | 5 |
| TERF1    | 3.31E-94  | 0.546693637 | 0.684 | 0.209 | 6.43E-90  | 10 | 5 |
| PSMA4    | 2.24E-49  | 0.546470174 | 0.934 | 0.516 | 4.34E-45  | 10 | 5 |
| COPRS    | 1.00E-122 | 0.546292333 | 0.584 | 0.133 | 1.94E-118 | 10 | 5 |
| RUNX1    | 1.26E-88  | 0.545976184 | 0.476 | 0.115 | 2.44E-84  | 10 | 5 |
| TMED10   | 7.15E-50  | 0.545092603 | 0.874 | 0.46  | 1.39E-45  | 10 | 5 |
| AGO2     | 4.32E-127 | 0.544932387 | 0.682 | 0.165 | 8.38E-123 | 10 | 5 |
| STK38L   | 5.69E-115 | 0.544590658 | 0.511 | 0.108 | 1.10E-110 | 10 | 5 |
| TLE2     | 2.47E-219 | 0.543720641 | 0.474 | 0.052 | 4.80E-215 | 10 | 5 |
| SERPINH1 | 2.10E-102 | 0.542967794 | 0.611 | 0.16  | 4.07E-98  | 10 | 5 |
| SYNE2    | 8.71E-67  | 0.54163327  | 0.774 | 0.306 | 1.69E-62  | 10 | 5 |
| FGFR4    | 4.82E-181 | 0.536662639 | 0.508 | 0.072 | 9.34E-177 | 10 | 5 |
| NAPG     | 1.26E-127 | 0.534248746 | 0.539 | 0.109 | 2.44E-123 | 10 | 5 |
| HM13     | 2.08E-75  | 0.534145562 | 0.795 | 0.303 | 4.03E-71  | 10 | 5 |
| GLB1     | 1.21E-107 | 0.531880707 | 0.587 | 0.147 | 2.35E-103 | 10 | 5 |
| FAM198B  | 8.67E-184 | 0.531526442 | 0.368 | 0.036 | 1.68E-179 | 10 | 5 |
| DDOST    | 1.33E-56  | 0.530854659 | 0.824 | 0.381 | 2.57E-52  | 10 | 5 |



|          |           |             |       |       |           |    |   |
|----------|-----------|-------------|-------|-------|-----------|----|---|
| ADGRG1   | 1.02E-118 | 0.530064739 | 0.582 | 0.135 | 1.98E-114 | 10 | 5 |
| HMGN3    | 2.96E-57  | 0.52972062  | 0.832 | 0.378 | 5.73E-53  | 10 | 5 |
| APMAP    | 2.03E-97  | 0.528681893 | 0.7   | 0.208 | 3.94E-93  | 10 | 5 |
| FAT1     | 1.79E-92  | 0.527413437 | 0.518 | 0.134 | 3.48E-88  | 10 | 5 |
| PRMT1    | 2.17E-75  | 0.526299854 | 0.776 | 0.289 | 4.21E-71  | 10 | 5 |
| HNRNPA0  | 3.69E-43  | 0.525593912 | 0.895 | 0.527 | 7.16E-39  | 10 | 5 |
| IP6K2    | 6.60E-87  | 0.523621093 | 0.718 | 0.24  | 1.28E-82  | 10 | 5 |
| TOP1     | 2.10E-60  | 0.520460807 | 0.797 | 0.35  | 4.08E-56  | 10 | 5 |
| MRPL51   | 2.68E-57  | 0.519763824 | 0.897 | 0.435 | 5.21E-53  | 10 | 5 |
| RDH10    | 4.03E-135 | 0.517135161 | 0.426 | 0.068 | 7.81E-131 | 10 | 5 |
| CBX1     | 7.72E-113 | 0.516994265 | 0.639 | 0.162 | 1.50E-108 | 10 | 5 |
| C1orf122 | 1.22E-74  | 0.516626385 | 0.632 | 0.214 | 2.36E-70  | 10 | 5 |
| ITGB8    | 4.67E-155 | 0.516248067 | 0.447 | 0.064 | 9.05E-151 | 10 | 5 |
| SRPK1    | 1.32E-58  | 0.515712338 | 0.703 | 0.286 | 2.55E-54  | 10 | 5 |
| PBX1     | 1.49E-119 | 0.515482403 | 0.5   | 0.101 | 2.90E-115 | 10 | 5 |
| GCC2     | 2.02E-47  | 0.513877198 | 0.9   | 0.494 | 3.92E-43  | 10 | 5 |
| ALCAM    | 4.33E-126 | 0.512181337 | 0.497 | 0.096 | 8.39E-122 | 10 | 5 |
| PLEKHA1  | 1.58E-112 | 0.511933304 | 0.658 | 0.169 | 3.07E-108 | 10 | 5 |
| TP53I3   | 2.61E-85  | 0.51100929  | 0.487 | 0.128 | 5.07E-81  | 10 | 5 |
| SH3PXD2A | 1.89E-113 | 0.510986692 | 0.482 | 0.099 | 3.66E-109 | 10 | 5 |
| ZBTB20   | 3.73E-66  | 0.51068218  | 0.75  | 0.289 | 7.24E-62  | 10 | 5 |
| SNRPD3   | 1.26E-66  | 0.50952479  | 0.855 | 0.364 | 2.45E-62  | 10 | 5 |
| CLCN3    | 5.32E-86  | 0.508120166 | 0.642 | 0.198 | 1.03E-81  | 10 | 5 |
| STARD3   | 1.09E-73  | 0.507896349 | 0.374 | 0.085 | 2.12E-69  | 10 | 5 |
| NCKAP1   | 8.07E-95  | 0.507474503 | 0.542 | 0.142 | 1.57E-90  | 10 | 5 |
| EMC2     | 8.35E-114 | 0.507049282 | 0.632 | 0.156 | 1.62E-109 | 10 | 5 |
| C9orf3   | 8.56E-103 | 0.506797987 | 0.403 | 0.078 | 1.66E-98  | 10 | 5 |
| NDUFA8   | 2.71E-72  | 0.50373493  | 0.779 | 0.299 | 5.25E-68  | 10 | 5 |
| PTOV1    | 2.90E-90  | 0.503383953 | 0.666 | 0.206 | 5.63E-86  | 10 | 5 |
| EIF4G2   | 5.05E-39  | 0.503194176 | 0.955 | 0.628 | 9.79E-35  | 10 | 5 |
| POLR2F   | 1.65E-74  | 0.502891197 | 0.858 | 0.342 | 3.20E-70  | 10 | 5 |
| FKBP3    | 1.22E-69  | 0.501642278 | 0.761 | 0.291 | 2.36E-65  | 10 | 5 |
| BTF3     | 3.04E-36  | 0.501504452 | 0.997 | 0.867 | 5.91E-32  | 10 | 5 |
| RAB3D    | 9.30E-129 | 0.501493179 | 0.495 | 0.094 | 1.80E-124 | 10 | 5 |
| LMAN2    | 1.89E-48  | 0.501311731 | 0.884 | 0.454 | 3.67E-44  | 10 | 5 |
| UGT8     | 3.91E-143 | 0.501304489 | 0.482 | 0.081 | 7.59E-139 | 10 | 5 |
| CPNE1    | 1.26E-73  | 0.50084778  | 0.742 | 0.274 | 2.44E-69  | 10 | 5 |
| YAP1     | 2.80E-122 | 0.50039865  | 0.489 | 0.097 | 5.43E-118 | 10 | 5 |
