# Supplementary material for: Single-Cell RNA Sequencing Reveals the Role of Epithelial Cell Marker Genes in Predicting the Prognosis of Colorectal Cancer Patients
Source: Hindawi journal article supplement (doi:10.1155/2022/8347125), 2022-08-01
Supplement: f2 [file 8347125.f2.zip]

**TableS4** MECRGs signature in TCGA-CRC training set

| id           | survival time | state | LGALS2   | GDE1     | MPC1     | GNG5     | BST2     | TPM2     | PRELID2  | CAPS     | CACNA1D  | riskScore   | risk |
|--------------|---------------|-------|----------|----------|----------|----------|----------|----------|----------|----------|----------|-------------|------|
| TCGA-AA-3511 | 0.580821918   | 0     | 3.807485 | 6.691154 | 5.464104 | 8.55487  | 7.448894 | 5.799264 | 3.775885 | 2.982107 | 3.856826 | 0.348859193 | low  |
| TCGA-CM-5864 | 1.252054795   | 0     | 2.881656 | 5.886878 | 5.63271  | 8.628573 | 6.217215 | 4.794617 | 3.730971 | 3.247117 | 3.251735 | 0.913413157 | low  |
| TCGA-G4-6320 | 2.202739726   | 0     | 5.239596 | 6.778319 | 5.476244 | 8.712277 | 5.087023 | 4.751993 | 4.242616 | 4.445011 | 3.31609  | 0.594948147 | low  |
| TCGA-AA-3846 | 1.419178082   | 0     | 4.419436 | 7.04178  | 6.285063 | 8.594475 | 5.027386 | 4.588173 | 4.18875  | 3.19042  | 2.94988  | 0.282700651 | low  |
| TCGA-NH-A6GB | 1.304109589   | 0     | 4.025493 | 6.180099 | 4.714672 | 8.170237 | 5.428786 | 4.490364 | 4.049477 | 3.269368 | 3.285437 | 0.971230044 | low  |
| TCGA-A6-6648 | 2.098630137   | 0     | 4.943689 | 6.899807 | 5.199751 | 8.115458 | 4.488755 | 4.540314 | 4.233506 | 3.137429 | 3.652108 | 0.280654166 | low  |
| TCGA-F4-6854 | 0.043835616   | 0     | 4.761769 | 6.263482 | 5.265092 | 8.529817 | 6.483902 | 6.234097 | 3.810679 | 3.371999 | 3.763976 | 0.574021873 | low  |
| TCGA-AA-3947 | 2.750684932   | 0     | 3.116881 | 7.311679 | 6.467407 | 8.629098 | 6.569433 | 4.445004 | 4.412234 | 2.60295  | 2.831771 | 0.222341268 | low  |
| TCGA-AA-3525 | 0.002739726   | 0     | 6.110559 | 6.797746 | 5.847647 | 8.366632 | 5.655257 | 5.174065 | 4.237648 | 3.363077 | 2.836376 | 0.449618672 | low  |
| TCGA-A6-5656 | 2.742465753   | 0     | 3.55782  | 6.311501 | 5.433676 | 8.115035 | 4.245774 | 5.223182 | 5.13785  | 4.525491 | 4.243969 | 0.478356731 | low  |
| TCGA-AA-3864 | 4.416438356   | 0     | 2.891905 | 7.198681 | 5.934663 | 8.663952 | 5.983486 | 5.235565 | 4.204499 | 2.859517 | 2.52953  | 0.514312047 | low  |
| TCGA-CM-6161 | 1.252054795   | 0     | 5.193646 | 6.831173 | 4.864899 | 8.248579 | 8.20254  | 5.13564  | 4.270466 | 4.587683 | 3.661869 | 0.862543663 | low  |
| TCGA-AA-3675 | 3.920547945   | 0     | 2.527324 | 6.582883 | 5.87758  | 8.626899 | 6.671667 | 5.272496 | 3.34428  | 3.489869 | 3.39572  | 0.644949769 | low  |
| TCGA-AA-3861 | 2.504109589   | 0     | 3.746759 | 6.700863 | 5.995509 | 8.654672 | 6.46127  | 3.595905 | 4.075112 | 3.041591 | 2.87346  | 0.419057827 | low  |
| TCGA-CM-6170 | 1.252054795   | 0     | 3.789704 | 6.948162 | 4.970693 | 8.375979 | 5.740069 | 5.358343 | 4.059642 | 3.849316 | 3.951638 | 0.456852266 | low  |
| TCGA-DM-A28E | 9.994520548   | 0     | 2.39195  | 6.231803 | 5.308952 | 8.36123  | 4.1347   | 4.41753  | 3.858038 | 3.222654 | 4.777083 | 0.223728876 | low  |
| TCGA-CM-4752 | 1.084931507   | 0     | 4.855129 | 6.666178 | 5.704277 | 8.005622 | 6.684277 | 5.950952 | 3.73275  | 3.864019 | 3.466199 | 0.640007244 | low  |
| TCGA-AZ-6603 | 2.463013699   | 1     | 3.364809 | 6.602481 | 5.136867 | 8.230356 | 6.712215 | 6.002489 | 3.922787 | 3.682766 | 3.925395 | 0.627360807 | low  |
| TCGA-AA-3534 | 2.416438356   | 0     | 5.621427 | 6.640866 | 4.700556 | 8.206408 | 5.119812 | 5.258226 | 3.599923 | 4.029685 | 3.445257 | 0.873377307 | low  |
| TCGA-AA-3821 | 0.084931507   | 0     | 4.537684 | 6.95551  | 5.678886 | 8.160811 | 6.644844 | 5.528956 | 4.357709 | 3.809961 | 2.954592 | 0.700591814 | low  |
| TCGA-AA-A02Y | 3.331506849   | 0     | 5.974583 | 6.103116 | 5.225661 | 8.468062 | 8.406668 | 3.670257 | 4.049036 | 2.558363 | 3.148469 | 0.481109223 | low  |
| TCGA-CM-5860 | 2.668493151   | 0     | 3.506488 | 6.889284 | 5.86881  | 8.614339 | 8.121468 | 6.536145 | 3.828716 | 3.131593 | 3.080955 | 0.607896798 | low  |
| TCGA-AA-A024 | 3.254794521   | 1     | 2.610626 | 6.587945 | 5.578769 | 8.554698 | 5.232534 | 4.308328 | 4.147543 | 3.754932 | 2.861712 | 0.949883179 | low  |
| TCGA-AY-A71X | 1.610958904   | 0     | 2.914008 | 6.632435 | 5.110226 | 8.726557 | 4.418672 | 4.832034 | 4.242859 | 4.340701 | 3.334911 | 0.971445393 | low  |
| TCGA-AZ-6606 | 0.978082192   | 1     | 3.336283 | 6.475461 | 5.841264 | 8.668725 | 8.700152 | 4.320283 | 4.414195 | 3.165195 | 2.829331 | 0.709540381 | low  |
| TCGA-G4-6297 | 6.865753425   | 0     | 3.609274 | 7.742911 | 4.664536 | 8.129731 | 7.347147 | 6.183094 | 3.708159 | 3.029285 | 3.405809 | 0.889489179 | low  |
| TCGA-AA-3526 | 1.589041096   | 0     | 3.757025 | 6.690879 | 5.13588  | 8.791641 | 8.924234 | 5.727809 | 4.408531 | 2.96158  | 2.903479 | 0.841023598 | low  |
| TCGA-AA-3678 | 3.917808219   | 0     | 6.416198 | 6.687935 | 4.991046 | 8.484967 | 5.849621 | 5.148549 | 4.63836  | 4.535924 | 3.419768 | 0.703463914 | low  |
| TCGA-G4-6625 | 7.649315068   | 0     | 5.137342 | 6.501433 | 5.629611 | 8.400285 | 7.138127 | 5.606235 | 3.799602 | 3.450186 | 3.45989  | 0.519733224 | low  |
| TCGA-F4-6808 | 2.805479452   | 0     | 4.667518 | 6.469836 | 5.085966 | 8.226856 | 5.507694 | 6.535039 | 3.793586 | 2.995105 | 3.314365 | 0.714711479 | low  |
| TCGA-A6-5659 | 2.536986301   | 0     | 2.269723 | 6.493361 | 4.888018 | 7.917009 | 4.793772 | 5.889427 | 4.553938 | 2.751644 | 3.602372 | 0.623864568 | low  |
| TCGA-CA-5797 | 1.049315068   | 0     | 6.122101 | 6.615461 | 5.465991 | 8.566657 | 7.407036 | 6.615055 | 4.305095 | 2.532075 | 3.583236 | 0.272575209 | low  |
| TCGA-A6-6780 | 1.676712329   | 0     | 2.628279 | 6.363167 | 5.636022 | 8.451783 | 7.786785 | 3.484144 | 4.83088  | 2.457376 | 2.305545 | 0.847931827 | low  |
| TCGA-G4-6626 | 0.002739726   | 1     | 2.20208  | 6.738079 | 4.975705 | 8.025003 | 4.67084  | 5.718503 | 4.268606 | 3.413614 | 3.524295 | 0.762397268 | low  |
| TCGA-CK-4947 | 1.463013699   | 0     | 6.588815 | 6.820336 | 5.354454 | 8.337422 | 7.18425  | 5.022224 | 4.336792 | 3.263108 | 2.877405 | 0.516411373 | low  |
| TCGA-AA-3858 | 2.589041096   | 0     | 4.441582 | 6.463792 | 5.169628 | 8.639038 | 5.796558 | 6.007282 | 3.343281 | 3.50583  | 3.291179 | 0.872248169 | low  |
| TCGA-D5-6929 | 1.117808219   | 0     | 4.10209  | 7.33822  | 5.382605 | 8.106536 | 7.157533 | 6.593069 | 4.313615 | 3.558913 | 3.306367 | 0.540389094 | low  |
| TCGA-NH-A8F7 | 1.487671233   | 0     | 3.081898 | 6.481302 | 5.310407 | 8.283925 | 4.181538 | 4.761204 | 4.446166 | 4.016629 | 3.778844 | 0.574217343 | low  |
| TCGA-AA-3561 | 1.161643836   | 0     | 5.166844 | 7.025007 | 7.101323 | 8.984036 | 7.130635 | 5.023595 | 4.277317 | 3.347499 | 2.852953 | 0.218147542 | low  |
| TCGA-AA-3538 | 2.167123288   | 0     | 5.819846 | 7.123845 | 5.267117 | 8.279641 | 5.20475  | 5.564053 | 4.060417 | 5.429816 | 3.389848 | 0.944195019 | low  |
| TCGA-AA-A011 | 2.583561644   | 0     | 3.122679 | 6.616957 | 5.690289 | 8.353808 | 7.492081 | 4.660733 | 4.215101 | 2.559394 | 3.508246 | 0.327590827 | low  |
| TCGA-AA-3544 | 1.167123288   | 0     | 5.21873  | 6.405502 | 5.660469 | 9.087597 | 8.234253 | 6.126861 | 3.678265 | 3.008403 | 2.550617 | 0.935839507 | low  |
| TCGA-AA-3850 | 0             | 1     | 5.25657  | 6.62194  | 6.286934 | 8.504683 | 5.949439 | 5.471337 | 3.914477 | 3.698949 | 2.744719 | 0.62283952  | low  |
| TCGA-AA-3815 | 2.753424658   | 0     | 5.232032 | 6.877025 | 5.243034 | 8.175769 | 8.201155 | 5.032708 | 4.239959 | 2.726764 | 2.838586 | 0.562186598 | low  |
| TCGA-AA-3663 | 0.580821918   | 0     | 3.245808 | 7.181094 | 5.91681  | 8.31249  | 6.048413 | 4.63316  | 3.805922 | 2.88616  | 2.630681 | 0.496034713 | low  |
| TCGA-DM-A1HB | 11.30410959   | 0     | 3.66702  | 6.215261 | 5.396527 | 8.501593 | 8.630561 | 4.588518 | 4.477673 | 2.391867 | 2.972371 | 0.63707591  | low  |
| TCGA-QG-A5Z2 | 2.608219178   | 0     | 4.184988 | 6.90102  | 5.446612 | 8.316236 | 6.427965 | 4.599996 | 4.247716 | 4.008874 | 2.783156 | 0.937685715 | low  |
| TCGA-AA-3986 | 1.589041096   | 0     | 6.734078 | 6.859418 | 5.169143 | 8.506464 | 5.845811 | 4.520971 | 4.024268 | 4.371298 | 2.790243 | 0.884380288 | low  |
| TCGA-CM-5868 | 1.419178082   | 0     | 3.489737 | 6.892771 | 5.227    | 8.782849 | 7.085847 | 6.336312 | 3.823454 | 3.391998 | 3.022471 | 0.885965325 | low  |

|              |             |   |          |          |          |          |          |          |          |          |          |             |     |
|--------------|-------------|---|----------|----------|----------|----------|----------|----------|----------|----------|----------|-------------|-----|
| TCGA-AA-A00L | 3.169863014 | 0 | 3.768427 | 6.474125 | 5.631117 | 8.679174 | 4.62241  | 4.829558 | 3.946964 | 3.492896 | 3.840046 | 0.341764369 | low |
| TCGA-A6-A567 | 5.153424658 | 1 | 3.799832 | 6.72988  | 5.196157 | 8.482013 | 4.086931 | 7.062995 | 3.929999 | 3.597696 | 3.863186 | 0.504052052 | low |
| TCGA-AA-3681 | 0.498630137 | 0 | 3.632893 | 6.54162  | 5.554113 | 8.407804 | 7.275948 | 4.990314 | 4.468567 | 3.255806 | 3.343413 | 0.539115586 | low |
| TCGA-AA-3543 | 0.082191781 | 0 | 6.432608 | 6.222861 | 5.689239 | 8.739608 | 8.922021 | 5.032802 | 4.224542 | 2.766081 | 2.398242 | 0.781582803 | low |
| TCGA-D5-6533 | 2.123287671 | 0 | 4.0771   | 6.774478 | 6.120038 | 8.335801 | 5.561736 | 4.907733 | 4.906424 | 3.338185 | 3.106169 | 0.358264999 | low |
| TCGA-A6-2675 | 3.619178082 | 0 | 5.264427 | 6.951776 | 5.433024 | 8.182134 | 6.446447 | 5.922214 | 4.048924 | 3.363289 | 3.378008 | 0.441902889 | low |
| TCGA-AA-3819 | 2.084931507 | 0 | 5.229596 | 6.660481 | 5.053639 | 8.919059 | 4.672671 | 5.517445 | 4.315819 | 3.947562 | 3.451319 | 0.564869259 | low |
| TCGA-AA-A03J | 3.41369863  | 0 | 5.480269 | 6.04044  | 5.276447 | 8.165067 | 6.997544 | 5.6678   | 3.369866 | 3.855668 | 3.98251  | 0.692822825 | low |
| TCGA-G4-6295 | 0.695890411 | 0 | 3.538366 | 6.833391 | 4.957598 | 8.157692 | 8.711185 | 6.19124  | 3.600163 | 2.757591 | 3.832815 | 0.492301418 | low |
| TCGA-AA-3518 | 0.084931507 | 0 | 4.179296 | 6.414262 | 5.574427 | 8.184766 | 8.578974 | 4.752126 | 3.783666 | 3.065303 | 3.295481 | 0.621824073 | low |
| TCGA-AZ-5407 | 7.350684932 | 0 | 4.069507 | 6.733678 | 5.694186 | 8.491378 | 5.241643 | 4.376998 | 4.610097 | 3.744886 | 2.772329 | 0.683586916 | low |
| TCGA-CA-5796 | 1.032876712 | 0 | 4.562349 | 6.373419 | 6.131047 | 8.609589 | 5.134285 | 3.675931 | 4.785332 | 2.784653 | 2.572356 | 0.40907202  | low |
| TCGA-D5-6538 | 1.42739726  | 0 | 3.708372 | 6.474645 | 5.305254 | 7.833841 | 3.995095 | 5.098325 | 3.764123 | 4.254335 | 3.665232 | 0.832210621 | low |
| TCGA-AA-A00E | 2.501369863 | 0 | 3.146776 | 7.012138 | 6.015469 | 8.42263  | 9.532102 | 4.703187 | 4.052058 | 2.783078 | 2.45351  | 0.674303858 | low |
| TCGA-AA-A00D | 1.583561644 | 0 | 4.173157 | 6.898604 | 5.098631 | 8.204249 | 9.540516 | 5.556458 | 3.753348 | 3.498196 | 3.282234 | 0.85837323  | low |
| TCGA-AA-3713 | 1.58630137  | 0 | 4.43281  | 6.464915 | 5.262596 | 8.215248 | 5.385221 | 5.157256 | 4.477539 | 3.016579 | 3.516007 | 0.430328859 | low |
| TCGA-AA-3548 | 2.832876712 | 0 | 3.565797 | 6.975178 | 6.119746 | 9.401084 | 8.52867  | 5.480079 | 3.805201 | 3.884931 | 2.665345 | 0.787991953 | low |
| TCGA-G4-6294 | 2.350684932 | 1 | 2.645892 | 6.447931 | 5.212892 | 8.473814 | 5.294989 | 4.735409 | 3.683634 | 3.464412 | 3.743685 | 0.595233164 | low |
| TCGA-CM-6172 | 0.917808219 | 0 | 3.919273 | 6.930789 | 5.929953 | 8.393044 | 5.10148  | 4.907239 | 4.47754  | 3.620134 | 3.549949 | 0.298913791 | low |
| TCGA-AA-A02W | 3.416438356 | 0 | 2.974422 | 7.041964 | 4.962687 | 8.232582 | 5.380636 | 5.533836 | 4.067798 | 4.395291 | 3.899761 | 0.679826835 | low |
| TCGA-CM-6162 | 1           | 0 | 5.934232 | 6.651978 | 5.193612 | 8.19517  | 6.984364 | 6.772186 | 3.961979 | 2.56349  | 2.836908 | 0.677204678 | low |
| TCGA-A6-6137 | 2.257534247 | 0 | 4.310086 | 6.596114 | 5.410379 | 8.427547 | 5.512067 | 4.870952 | 4.538774 | 4.573703 | 3.246888 | 0.923085786 | low |
| TCGA-AA-3697 | 7.087671233 | 0 | 4.932269 | 6.614953 | 5.362428 | 8.787494 | 5.216913 | 6.081021 | 4.244082 | 3.231218 | 3.643499 | 0.359259441 | low |
| TCGA-CA-6716 | 1.016438356 | 0 | 2.155487 | 6.8404   | 5.012343 | 8.241994 | 4.000551 | 6.053261 | 3.621667 | 4.092169 | 3.807904 | 0.831167431 | low |
| TCGA-DM-A1D0 | 10.88767123 | 0 | 1.945398 | 6.28273  | 5.435089 | 9.037747 | 4.374198 | 4.881456 | 4.337626 | 3.307711 | 3.379951 | 0.630448676 | low |
| TCGA-RU-A8FL | 3.224657534 | 0 | 5.883175 | 6.378267 | 6.576111 | 8.926178 | 3.902366 | 4.061755 | 3.699051 | 4.698114 | 3.008492 | 0.529021793 | low |
| TCGA-CK-5912 | 4.090410959 | 1 | 3.622851 | 7.327089 | 5.713414 | 8.610072 | 5.040878 | 4.849786 | 3.907648 | 4.127448 | 3.680912 | 0.324679031 | low |
| TCGA-A6-5667 | 2.430136986 | 0 | 3.296747 | 6.827053 | 4.821037 | 8.394032 | 5.645392 | 7.268104 | 4.692387 | 3.108264 | 3.515296 | 0.650239511 | low |
| TCGA-AZ-6605 | 0.435616438 | 1 | 3.044192 | 6.864385 | 5.457197 | 8.381891 | 7.05264  | 6.429821 | 3.779595 | 3.416862 | 3.012775 | 0.963383471 | low |
| TCGA-G4-6322 | 2.169863014 | 0 | 3.119049 | 6.790711 | 5.877183 | 8.756208 | 5.849822 | 5.110504 | 4.310092 | 3.495864 | 2.710271 | 0.725200722 | low |
| TCGA-A6-2678 | 3.523287671 | 0 | 2.406092 | 6.668399 | 5.432629 | 8.761697 | 7.879094 | 5.081284 | 4.415408 | 3.323148 | 3.197543 | 0.718381678 | low |
| TCGA-G4-6323 | 1.147945205 | 0 | 5.55793  | 6.944875 | 4.949286 | 8.750394 | 5.148425 | 4.240714 | 4.136364 | 3.476282 | 3.356301 | 0.382838604 | low |
| TCGA-A6-6650 | 1.717808219 | 0 | 3.047258 | 6.430087 | 6.239489 | 8.236104 | 4.607254 | 4.230701 | 5.387146 | 3.253432 | 3.836569 | 0.203822241 | low |
| TCGA-DM-A28M | 7.931506849 | 0 | 3.633236 | 5.692884 | 5.833093 | 8.86005  | 4.717064 | 4.518601 | 4.516876 | 2.797468 | 2.72286  | 0.781216117 | low |
| TCGA-CM-5344 | 1.835616438 | 0 | 3.791537 | 7.244017 | 5.402455 | 8.740993 | 5.748447 | 6.59617  | 3.795115 | 3.468701 | 3.179108 | 0.556834247 | low |
| TCGA-AA-3494 | 0.084931507 | 0 | 4.187789 | 7.114538 | 5.209469 | 8.101417 | 4.544912 | 5.194764 | 4.288668 | 4.033897 | 3.758765 | 0.416632255 | low |
| TCGA-CM-4743 | 1.920547945 | 0 | 6.606605 | 6.502017 | 6.402398 | 8.965251 | 9.495738 | 5.128249 | 4.245459 | 2.595142 | 2.178198 | 0.497786879 | low |
| TCGA-QG-A5YX | 2.747945205 | 0 | 5.624138 | 6.529453 | 6.280579 | 8.646079 | 4.078138 | 3.873609 | 5.352325 | 4.418632 | 2.948528 | 0.421384035 | low |
| TCGA-AA-3664 | 4.501369863 | 0 | 5.440831 | 6.535874 | 5.839884 | 7.94641  | 7.708698 | 5.629868 | 4.203855 | 4.025691 | 3.462709 | 0.617265833 | low |
| TCGA-A6-6653 | 2.032876712 | 0 | 6.033326 | 7.00398  | 5.402215 | 8.479803 | 8.100159 | 4.994093 | 4.605318 | 2.368431 | 2.514309 | 0.415967016 | low |
| TCGA-AY-A54L | 1.438356164 | 0 | 3.30731  | 6.319072 | 5.710677 | 9.038088 | 4.431683 | 6.202528 | 4.375388 | 3.941798 | 3.25392  | 0.799168825 | low |
| TCGA-AA-3685 | 3.087671233 | 0 | 5.221409 | 6.829377 | 5.559868 | 8.617954 | 7.040379 | 5.541207 | 4.273709 | 3.182931 | 2.894668 | 0.535881363 | low |
| TCGA-CK-4952 | 1.301369863 | 0 | 4.47297  | 6.041038 | 6.056218 | 8.231566 | 7.481229 | 4.22812  | 4.58698  | 2.673581 | 3.681772 | 0.268750786 | low |
| TCGA-AA-3530 | 1.589041096 | 0 | 3.815275 | 6.373691 | 5.940051 | 8.776061 | 6.120359 | 6.016092 | 4.3185   | 4.057578 | 3.4873   | 0.640201927 | low |
| TCGA-A6-5660 | 2.432876712 | 0 | 3.484838 | 7.29662  | 5.609785 | 8.203027 | 5.623512 | 6.241755 | 4.128332 | 4.498301 | 3.311045 | 0.751058005 | low |
| TCGA-CM-6674 | 1.079452055 | 0 | 4.791239 | 6.357598 | 5.587851 | 8.492086 | 7.115882 | 6.48114  | 3.934948 | 2.641091 | 2.622692 | 0.887297152 | low |
| TCGA-AA-A00J | 1.504109589 | 0 | 3.154157 | 6.244118 | 5.691236 | 8.234623 | 7.887383 | 5.560548 | 3.890054 | 2.993949 | 3.33418  | 0.726450606 | low |
| TCGA-AA-3939 | 1.082191781 | 0 | 3.41169  | 6.877643 | 6.363435 | 8.819078 | 6.120025 | 5.138062 | 4.782216 | 3.527518 | 2.425629 | 0.622730609 | low |
| TCGA-T9-A92H | 0.991780822 | 0 | 2.945775 | 7.541867 | 5.755123 | 8.702605 | 4.403503 | 4.540707 | 4.740374 | 3.066663 | 2.882936 | 0.282710293 | low |
| TCGA-A6-2672 | 3.887671233 | 0 | 5.4094   | 6.479468 | 4.92355  | 7.850013 | 8.205169 | 5.07529  | 4.705224 | 3.114196 | 3.75428  | 0.456345359 | low |
| TCGA-A6-2684 | 3.087671233 | 0 | 3.886974 | 6.140616 | 5.504098 | 8.079974 | 6.816133 | 6.07986  | 3.980606 | 3.104303 | 3.649524 | 0.636982942 | low |

|              |             |   |          |          |          |          |          |          |          |          |          |             |     |
|--------------|-------------|---|----------|----------|----------|----------|----------|----------|----------|----------|----------|-------------|-----|
| TCGA-AA-A01F | 2.668493151 | 0 | 3.987825 | 5.825533 | 5.601993 | 7.993288 | 4.9367   | 3.699209 | 3.77119  | 3.246996 | 3.345074 | 0.700211722 | low |
| TCGA-AA-3977 | 2.084931507 | 0 | 3.034403 | 6.921526 | 6.78329  | 8.900177 | 6.530907 | 4.827923 | 4.396857 | 3.400218 | 2.258923 | 0.577661099 | low |
| TCGA-AA-3955 | 1.747945205 | 0 | 3.944873 | 7.506979 | 6.116015 | 8.804944 | 5.264761 | 4.813235 | 4.793962 | 2.747153 | 3.599884 | 0.104268311 | low |
| TCGA-AA-3971 | 1.339726027 | 0 | 5.67744  | 7.268858 | 5.802341 | 8.497077 | 7.081528 | 6.385021 | 4.05971  | 3.710524 | 3.512795 | 0.312066364 | low |
| TCGA-AA-3818 | 0.082191781 | 1 | 3.228537 | 6.767235 | 5.294205 | 8.735346 | 7.985514 | 4.895549 | 4.080909 | 3.158347 | 3.264342 | 0.590131442 | low |
| TCGA-AA-A01V | 0.084931507 | 0 | 7.04198  | 6.187765 | 4.838488 | 8.034801 | 5.827395 | 3.911978 | 3.67836  | 3.979    | 3.257367 | 0.904862794 | low |
| TCGA-AA-3524 | 3.002739726 | 0 | 5.701486 | 7.122839 | 5.731353 | 8.566588 | 6.852268 | 5.010377 | 4.852753 | 2.677002 | 2.142238 | 0.480889553 | low |
| TCGA-AA-3989 | 0.663013699 | 1 | 3.128527 | 6.979298 | 5.954241 | 8.357876 | 6.089012 | 5.306686 | 3.888159 | 4.145059 | 3.326733 | 0.614636586 | low |
| TCGA-D5-5541 | 4.660273973 | 0 | 3.964007 | 6.360933 | 4.927449 | 8.130545 | 6.49087  | 6.081962 | 4.111286 | 3.560199 | 3.719174 | 0.821687607 | low |
| TCGA-AA-3666 | 0.167123288 | 1 | 6.420061 | 5.550845 | 6.16573  | 9.020802 | 6.473982 | 6.423053 | 4.323375 | 3.086809 | 3.09701  | 0.585753646 | low |
| TCGA-AA-A01Z | 3.084931507 | 0 | 2.127025 | 6.383555 | 6.008857 | 8.178611 | 5.354892 | 4.924641 | 4.216179 | 3.507115 | 3.391078 | 0.614314666 | low |
| TCGA-AA-3519 | 0.756164384 | 0 | 5.926926 | 6.611673 | 5.876033 | 8.462084 | 6.566701 | 4.551374 | 4.508325 | 3.421041 | 3.429347 | 0.289839736 | low |
| TCGA-D5-6539 | 1.04109589  | 0 | 5.145587 | 7.319016 | 6.525034 | 8.443512 | 5.963765 | 4.731794 | 4.52927  | 3.161466 | 3.041319 | 0.183520334 | low |
| TCGA-D5-6920 | 1.032876712 | 0 | 5.103482 | 6.481    | 5.573109 | 8.439606 | 5.482201 | 4.877912 | 4.377406 | 3.054837 | 2.778919 | 0.593918841 | low |
| TCGA-CM-6678 | 0.917808219 | 0 | 2.724429 | 6.281189 | 5.355576 | 8.651408 | 5.715873 | 5.27058  | 4.185214 | 3.286457 | 3.119666 | 0.915104008 | low |
| TCGA-AA-3941 | 2           | 0 | 2.577099 | 6.584712 | 5.714024 | 9.22474  | 7.468907 | 4.514934 | 4.410354 | 4.67402  | 3.669354 | 0.689357932 | low |
| TCGA-AA-3855 | 2.671232877 | 0 | 8.78439  | 6.41519  | 5.419563 | 8.222094 | 5.266317 | 5.294127 | 4.670143 | 3.032057 | 2.896791 | 0.375914126 | low |
| TCGA-AY-5543 | 2.750684932 | 0 | 3.200708 | 7.052741 | 6.581246 | 9.105397 | 7.931992 | 4.249778 | 5.321207 | 3.066013 | 2.674814 | 0.285247576 | low |
| TCGA-AA-A00W | 1.249315068 | 0 | 3.476242 | 6.462222 | 5.576802 | 8.582119 | 5.729416 | 4.519644 | 4.256793 | 3.248772 | 3.747398 | 0.349929128 | low |
| TCGA-AA-3560 | 1.665753425 | 0 | 5.560345 | 6.758511 | 5.604943 | 7.858517 | 7.411338 | 5.886191 | 3.58164  | 3.167555 | 3.415675 | 0.468716411 | low |
| TCGA-AZ-6598 | 4.117808219 | 1 | 2.708507 | 5.799968 | 5.446354 | 8.392609 | 7.552203 | 6.392815 | 4.072383 | 2.371906 | 3.221609 | 0.951883244 | low |
| TCGA-G4-6321 | 1.84109589  | 0 | 4.026026 | 6.87032  | 6.245627 | 8.694198 | 6.255261 | 3.64935  | 4.702413 | 2.922073 | 2.40211  | 0.400694909 | low |
| TCGA-AA-3866 | 1.419178082 | 0 | 2.919363 | 6.930235 | 5.899021 | 8.284162 | 6.315196 | 6.154829 | 4.480433 | 4.038069 | 2.94696  | 0.908914879 | low |
| TCGA-AY-6197 | 1.78630137  | 0 | 6.353035 | 6.333801 | 5.081654 | 7.958166 | 5.98515  | 4.894098 | 4.363939 | 2.796176 | 2.668523 | 0.771475039 | low |
| TCGA-AA-A01T | 2.753424658 | 0 | 4.312946 | 6.697491 | 5.85987  | 8.831944 | 7.678741 | 5.033819 | 3.956852 | 4.41275  | 3.08617  | 0.858848171 | low |
| TCGA-AA-A00Z | 1.832876712 | 0 | 4.065302 | 6.244323 | 5.519588 | 8.682554 | 6.671195 | 4.973539 | 4.571868 | 3.959733 | 3.282572 | 0.82297361  | low |
| TCGA-CK-5914 | 1.832876712 | 0 | 2.864602 | 7.174835 | 5.276966 | 8.451526 | 6.403811 | 4.913431 | 4.059203 | 2.998595 | 3.809435 | 0.27878484  | low |
| TCGA-AD-A5EJ | 0           | 0 | 5.213842 | 6.706601 | 5.696521 | 8.380523 | 5.191445 | 5.451382 | 3.828785 | 3.029489 | 2.831649 | 0.532460919 | low |
| TCGA-DM-A282 | 11.59726027 | 0 | 5.814616 | 6.13443  | 5.355799 | 8.84741  | 5.786436 | 5.856146 | 4.269655 | 4.384933 | 3.472569 | 0.854713861 | low |
| TCGA-AA-3949 | 2.167123288 | 0 | 4.460346 | 6.817525 | 6.022345 | 9.008465 | 8.197402 | 6.099935 | 3.714044 | 2.741309 | 2.121003 | 0.853893313 | low |
| TCGA-A6-4107 | 2.704109589 | 0 | 5.315115 | 7.094752 | 6.152376 | 8.653988 | 6.605937 | 5.877464 | 4.533843 | 3.881747 | 2.6611   | 0.555526591 | low |
| TCGA-G4-6293 | 11.09863014 | 0 | 4.296365 | 6.608426 | 4.983041 | 8.40476  | 5.845567 | 4.722655 | 4.647714 | 3.370878 | 2.941587 | 0.805556062 | low |
| TCGA-AA-3522 | 3.087671233 | 0 | 3.829692 | 6.9543   | 6.51038  | 8.379204 | 6.072048 | 4.785423 | 5.017157 | 3.262974 | 2.657336 | 0.379011645 | low |
| TCGA-CM-4748 | 2.169863014 | 0 | 3.1047   | 6.759564 | 5.846444 | 8.388335 | 7.614708 | 6.572374 | 4.928073 | 3.849778 | 3.447315 | 0.624163308 | low |
| TCGA-AA-3869 | 2.252054795 | 1 | 5.284723 | 6.649259 | 5.809352 | 8.297025 | 6.076553 | 5.047625 | 3.555167 | 3.411383 | 2.935567 | 0.605195792 | low |
| TCGA-AY-6386 | 1.484931507 | 0 | 4.185923 | 7.06254  | 5.740147 | 8.841112 | 5.336173 | 4.075222 | 4.866959 | 4.163488 | 2.289141 | 0.853688045 | low |
| TCGA-A6-2680 | 2.926027397 | 0 | 6.500024 | 6.561529 | 5.979617 | 7.723187 | 6.377661 | 5.387646 | 4.140898 | 3.582644 | 3.559695 | 0.347101101 | low |
| TCGA-AA-3862 | 2.504109589 | 0 | 7.479832 | 6.349334 | 6.738916 | 8.53505  | 8.160203 | 5.813495 | 5.153683 | 3.241815 | 2.693249 | 0.347303659 | low |
| TCGA-A6-3810 | 3.043835616 | 0 | 3.061037 | 6.363377 | 5.40642  | 8.389075 | 5.740951 | 5.536319 | 4.910983 | 3.428051 | 3.609863 | 0.557921579 | low |
| TCGA-AA-3693 | 0           | 0 | 2.474858 | 6.834235 | 5.448344 | 8.833752 | 4.49418  | 6.747161 | 4.700039 | 3.058476 | 3.570444 | 0.395371134 | low |
| TCGA-AA-3814 | 0           | 0 | 4.400863 | 7.098705 | 5.577901 | 8.692325 | 6.052894 | 5.905927 | 3.761361 | 3.203647 | 2.891747 | 0.542798298 | low |
| TCGA-AA-3679 | 1.252054795 | 0 | 4.184196 | 6.85115  | 5.693355 | 8.867658 | 5.223867 | 6.150918 | 3.94129  | 3.472162 | 3.268617 | 0.470157333 | low |
| TCGA-G4-6303 | 5.487671233 | 1 | 2.434277 | 6.871503 | 4.675385 | 7.548996 | 5.092306 | 5.59077  | 4.333586 | 3.520316 | 4.184598 | 0.525500058 | low |
| TCGA-G4-6586 | 2.983561644 | 0 | 4.987683 | 6.274588 | 5.67246  | 8.638968 | 8.960913 | 4.064973 | 3.975636 | 3.013894 | 2.953381 | 0.619454643 | low |
| TCGA-QG-A5YV | 3.564383562 | 0 | 4.176896 | 6.688178 | 5.332778 | 8.668822 | 5.866941 | 6.406375 | 4.113604 | 3.96664  | 3.173751 | 0.928425331 | low |
| TCGA-AA-3495 | 3.087671233 | 0 | 3.849569 | 6.935922 | 5.714097 | 8.539139 | 5.516709 | 5.176183 | 4.742186 | 4.445914 | 3.158357 | 0.683978816 | low |
| TCGA-AA-3842 | 3.084931507 | 0 | 6.394299 | 6.374676 | 6.306229 | 8.2402   | 6.541294 | 5.978848 | 4.14882  | 2.600751 | 2.941449 | 0.342102593 | low |
| TCGA-AA-3844 | 1.243835616 | 0 | 4.485625 | 6.407072 | 6.354362 | 8.74697  | 6.176574 | 4.444493 | 4.572464 | 2.625523 | 3.215501 | 0.230580049 | low |
| TCGA-AA-3982 | 2.252054795 | 0 | 5.110059 | 6.944783 | 5.909576 | 8.700483 | 5.901749 | 5.487192 | 4.785388 | 4.007772 | 3.069159 | 0.462728314 | low |
| TCGA-A6-6140 | 2.010958904 | 0 | 4.445386 | 6.889633 | 5.522261 | 8.426275 | 4.546688 | 4.7939   | 5.019558 | 3.568482 | 3.965993 | 0.208262847 | low |
| TCGA-AA-3509 | 5.246575342 | 0 | 5.887325 | 6.717401 | 5.406878 | 7.548409 | 6.595789 | 5.143233 | 4.702005 | 3.655202 | 3.15417  | 0.614793771 | low |

|              |             |   |          |          |          |          |          |          |          |          |          |             |     |
|--------------|-------------|---|----------|----------|----------|----------|----------|----------|----------|----------|----------|-------------|-----|
| TCGA-QL-A97D | 1.824657534 | 0 | 3.783887 | 6.500437 | 5.661103 | 8.545325 | 7.911473 | 5.237768 | 4.581687 | 3.140044 | 3.092865 | 0.611504808 | low |
| TCGA-F4-6461 | 0.926027397 | 1 | 3.171119 | 6.491505 | 5.116242 | 8.43991  | 6.684984 | 5.824419 | 3.33149  | 3.520196 | 3.815496 | 0.727530797 | low |
| TCGA-AZ-6600 | 1.008219178 | 1 | 5.22763  | 5.975858 | 5.764561 | 8.088695 | 6.557621 | 6.375317 | 4.012071 | 3.001906 | 2.896493 | 0.938399972 | low |
| TCGA-AA-3520 | 2.002739726 | 0 | 3.615887 | 7.151297 | 6.094989 | 8.286181 | 8.877021 | 6.214306 | 3.950193 | 3.880315 | 2.98551  | 0.746757417 | low |
| TCGA-AA-3854 | 3.002739726 | 0 | 3.032696 | 6.719473 | 5.123043 | 8.741294 | 5.338172 | 5.982326 | 3.853475 | 3.311471 | 2.985288 | 0.951292962 | low |
| TCGA-G4-6588 | 2.180821918 | 0 | 4.477418 | 6.384715 | 5.702685 | 8.053113 | 8.08935  | 5.301222 | 3.951216 | 2.569325 | 3.052088 | 0.573643251 | low |
| TCGA-CM-5348 | 1.915068493 | 0 | 6.345457 | 7.123529 | 4.999567 | 8.624328 | 6.346828 | 6.699297 | 3.778002 | 4.909547 | 3.484003 | 0.868089548 | low |
| TCGA-AA-3875 | 1.504109589 | 0 | 4.763433 | 6.728359 | 5.589172 | 8.766303 | 6.286736 | 5.247891 | 4.881946 | 4.160346 | 3.044776 | 0.68601734  | low |
| TCGA-AA-3510 | 5.331506849 | 0 | 3.978052 | 6.10165  | 6.127285 | 8.248656 | 5.653262 | 5.225843 | 3.615132 | 3.123445 | 2.774673 | 0.856892434 | low |
| TCGA-AA-3555 | 2.495890411 | 0 | 2.515602 | 7.173713 | 5.468853 | 8.315169 | 7.44832  | 5.249048 | 4.484251 | 2.823902 | 3.266391 | 0.408935866 | low |
| TCGA-A6-6781 | 1.638356164 | 0 | 3.82443  | 6.366456 | 5.066241 | 7.86311  | 6.661286 | 6.723748 | 4.287549 | 2.688768 | 3.401474 | 0.749138679 | low |
| TCGA-A6-6141 | 0.698630137 | 0 | 5.031529 | 6.837716 | 5.797335 | 8.683815 | 8.299587 | 5.286637 | 4.159795 | 3.525357 | 3.276642 | 0.435313027 | low |
| TCGA-A6-6138 | 1.876712329 | 0 | 4.495408 | 7.119933 | 5.222663 | 8.47703  | 7.152445 | 5.565856 | 3.680416 | 2.540348 | 3.767696 | 0.236234017 | low |
| TCGA-DM-A1D7 | 1.109589041 | 1 | 4.439254 | 6.665269 | 5.992251 | 8.740837 | 8.230095 | 5.9127   | 4.198584 | 3.318199 | 3.307698 | 0.44445154  | low |
| TCGA-D5-6927 | 0.78630137  | 0 | 3.33008  | 6.689715 | 5.403303 | 7.839211 | 7.01034  | 6.06811  | 3.591301 | 2.89418  | 3.234597 | 0.748370251 | low |
| TCGA-G4-6306 | 3.723287671 | 0 | 6.10511  | 7.052194 | 5.296199 | 8.655121 | 8.642701 | 4.742388 | 4.129729 | 3.378899 | 3.380797 | 0.346973386 | low |
| TCGA-AA-3556 | 1.917808219 | 0 | 4.687404 | 6.86466  | 5.274643 | 8.76842  | 7.694546 | 4.118238 | 4.382016 | 3.034267 | 3.433565 | 0.316183245 | low |
| TCGA-AA-A01G | 1           | 0 | 3.869847 | 6.835556 | 5.064349 | 8.390895 | 8.189951 | 4.526012 | 3.874018 | 3.043691 | 3.353174 | 0.546794941 | low |
| TCGA-AA-A010 | 2.915068493 | 0 | 5.670021 | 6.087753 | 5.400387 | 8.014754 | 6.657897 | 5.229415 | 4.686104 | 3.438333 | 2.894065 | 0.964672804 | low |
| TCGA-5M-AATE | 3.287671233 | 0 | 2.400546 | 6.23223  | 5.158113 | 8.478893 | 5.731212 | 5.555048 | 3.530911 | 3.387868 | 3.632842 | 0.889964772 | low |
| TCGA-CM-6679 | 0.838356164 | 0 | 4.019007 | 6.773407 | 5.248175 | 8.334319 | 6.769812 | 6.756368 | 3.848915 | 4.446449 | 4.084381 | 0.680288075 | low |
| TCGA-AA-3532 | 2.416438356 | 0 | 5.426865 | 7.257498 | 6.303087 | 8.539667 | 6.779806 | 5.650269 | 3.908685 | 4.056192 | 2.784226 | 0.502805779 | low |
| TCGA-AA-3531 | 2.835616438 | 0 | 4.723245 | 5.969506 | 5.439122 | 7.955018 | 4.906751 | 4.38507  | 3.48344  | 4.37729  | 4.108023 | 0.662583085 | low |
| TCGA-DM-A28G | 5.065753425 | 1 | 4.341398 | 6.79963  | 5.296446 | 8.459878 | 5.239337 | 5.091353 | 4.161038 | 4.831818 | 3.407829 | 0.912130259 | low |
| TCGA-AA-3956 | 2.835616438 | 0 | 4.601042 | 6.600257 | 6.037089 | 8.449953 | 5.692901 | 5.785857 | 4.28661  | 5.065311 | 3.285594 | 0.940797124 | low |
| TCGA-A6-3807 | 2.887671233 | 0 | 3.596247 | 6.45097  | 6.046543 | 8.617926 | 5.792134 | 5.730229 | 4.515765 | 3.274233 | 2.641962 | 0.784240574 | low |
| TCGA-AA-3688 | 1.583561644 | 0 | 3.544995 | 6.657762 | 6.104051 | 8.568272 | 5.085082 | 4.92257  | 3.704256 | 4.599138 | 3.409997 | 0.677367354 | low |
| TCGA-CM-6168 | 1.082191781 | 0 | 3.866281 | 6.779335 | 5.22657  | 8.156958 | 6.960514 | 7.004339 | 4.032596 | 3.367422 | 3.134773 | 0.964194748 | low |
| TCGA-DM-A28F | 2.997260274 | 1 | 3.79489  | 6.610089 | 5.40172  | 8.473402 | 7.545528 | 5.10212  | 4.22762  | 3.746736 | 3.141401 | 0.868060493 | low |
| TCGA-DM-A28C | 6.780821918 | 1 | 2.221387 | 6.386088 | 5.712095 | 8.314808 | 3.933533 | 4.4078   | 3.094298 | 3.647668 | 3.674316 | 0.599475852 | low |
| TCGA-DM-A1DB | 3.693150685 | 1 | 7.046592 | 6.510387 | 4.606984 | 7.573241 | 5.169133 | 4.810324 | 3.56638  | 3.67248  | 3.629687 | 0.636659613 | low |
| TCGA-CK-4951 | 5.846575342 | 1 | 4.397077 | 6.583314 | 6.148439 | 8.266469 | 9.517861 | 6.639145 | 4.246155 | 2.70841  | 2.635494 | 0.733704839 | low |
| TCGA-AA-3979 | 2           | 0 | 4.287547 | 6.54949  | 6.208365 | 9.027254 | 9.175336 | 3.877421 | 4.365125 | 3.630414 | 2.283149 | 0.894958978 | low |
| TCGA-A6-5665 | 1.838356164 | 0 | 5.440765 | 6.55853  | 5.010612 | 7.911688 | 7.794661 | 4.920055 | 5.266639 | 2.827275 | 3.043683 | 0.564275809 | low |
| TCGA-AD-6965 | 2.205479452 | 0 | 3.90594  | 7.112907 | 4.982762 | 7.844243 | 6.039768 | 5.452325 | 4.046805 | 3.350127 | 3.297866 | 0.63174588  | low |
| TCGA-AA-3680 | 0.917808219 | 1 | 4.062091 | 7.146783 | 5.379628 | 8.769394 | 6.908133 | 4.875592 | 4.296848 | 4.560178 | 3.264368 | 0.712826381 | low |
| TCGA-AZ-4615 | 2.745205479 | 0 | 3.389926 | 6.746588 | 5.735279 | 8.315854 | 7.83732  | 5.422708 | 4.061712 | 2.568132 | 2.322506 | 0.902012669 | low |
| TCGA-AZ-5403 | 5.232876712 | 1 | 4.138013 | 7.677666 | 5.759604 | 8.407895 | 5.719019 | 6.697888 | 4.091109 | 5.08507  | 3.269945 | 0.716536507 | low |
| TCGA-AZ-4315 | 4.865753425 | 0 | 4.276006 | 7.241504 | 6.209151 | 8.997825 | 6.634649 | 5.889632 | 4.011533 | 2.532008 | 2.581194 | 0.321796966 | low |
| TCGA-AA-3972 | 4.249315068 | 0 | 2.756335 | 6.559085 | 5.713124 | 8.828527 | 4.575445 | 4.698962 | 3.683449 | 3.244086 | 3.492353 | 0.421585084 | low |
| TCGA-AA-3517 | 3.249315068 | 0 | 5.23699  | 5.95354  | 5.025531 | 7.216787 | 5.311418 | 5.326716 | 3.913225 | 3.962139 | 4.202886 | 0.723282961 | low |
| TCGA-AA-3877 | 2.583561644 | 0 | 7.071958 | 6.732385 | 6.064968 | 8.406829 | 8.4286   | 5.874217 | 3.933798 | 2.977019 | 3.058781 | 0.338070579 | low |
| TCGA-NH-A50T | 1.515068493 | 0 | 3.219362 | 6.209965 | 5.252786 | 8.342343 | 4.025092 | 4.899567 | 4.125517 | 3.529956 | 3.197484 | 0.924952863 | low |
| TCGA-F4-6809 | 1.104109589 | 1 | 3.912285 | 6.406846 | 5.532435 | 8.388649 | 7.219637 | 6.782588 | 3.564975 | 3.480622 | 3.353165 | 0.923275856 | low |
| TCGA-G4-6309 | 7.123287671 | 0 | 5.776317 | 6.841699 | 5.408449 | 8.603723 | 6.542532 | 5.208496 | 3.95175  | 2.699094 | 2.295553 | 0.684825664 | low |
| TCGA-CK-5915 | 0           | 0 | 2.174978 | 6.400285 | 4.668074 | 8.346215 | 6.547668 | 3.637302 | 4.337182 | 2.685494 | 4.162865 | 0.353518798 | low |
| TCGA-AD-6889 | 6.936986301 | 1 | 3.489577 | 7.289902 | 5.568897 | 8.22331  | 5.363713 | 5.137798 | 4.666464 | 2.690183 | 2.928446 | 0.342556762 | low |
| TCGA-AA-3968 | 1.832876712 | 0 | 3.620761 | 6.57234  | 5.507717 | 8.341827 | 5.564314 | 5.967376 | 4.16551  | 3.41948  | 2.925322 | 0.91623667  | low |
| TCGA-CM-6675 | 1.087671233 | 0 | 6.048898 | 6.708227 | 4.908284 | 8.631323 | 8.853747 | 5.429879 | 5.275479 | 3.469177 | 3.236861 | 0.565883698 | low |
| TCGA-A6-A565 | 1.353424658 | 1 | 4.711475 | 6.721189 | 5.603201 | 8.46389  | 6.202804 | 5.921443 | 4.475076 | 3.780422 | 2.852276 | 0.832179588 | low |
| TCGA-CM-6165 | 1.336986301 | 0 | 4.511281 | 6.816415 | 5.825528 | 8.551316 | 5.826461 | 5.694934 | 4.438247 | 3.015793 | 3.697724 | 0.230286624 | low |

|              |             |   |          |          |          |          |          |          |          |          |          |             |      |
|--------------|-------------|---|----------|----------|----------|----------|----------|----------|----------|----------|----------|-------------|------|
| TCGA-AY-4071 | 0.079452055 | 1 | 5.255681 | 6.808506 | 5.683475 | 8.951848 | 6.641816 | 5.618544 | 4.400037 | 3.420098 | 3.439151 | 0.326029924 | low  |
| TCGA-CM-6163 | 1.169863014 | 0 | 4.226325 | 6.839729 | 5.880893 | 8.115835 | 5.914967 | 5.206471 | 4.2984   | 3.88214  | 3.16688  | 0.577114922 | low  |
| TCGA-A6-2677 | 2.02739726  | 1 | 3.175903 | 6.226532 | 4.943604 | 8.369976 | 4.147037 | 4.373579 | 5.583718 | 3.803216 | 3.114363 | 0.96542832  | low  |
| TCGA-AA-3712 | 0           | 0 | 3.946688 | 6.623576 | 4.986139 | 8.204637 | 5.960549 | 6.022764 | 3.773313 | 3.282772 | 3.150465 | 0.963648312 | low  |
| TCGA-G4-6628 | 6.64109589  | 0 | 4.578579 | 6.32763  | 5.123196 | 7.779916 | 9.638384 | 4.835093 | 3.530688 | 2.778778 | 3.260504 | 0.845755    | low  |
| TCGA-D5-6898 | 0.62739726  | 0 | 3.917178 | 6.834237 | 5.119364 | 8.688283 | 5.848475 | 6.748322 | 4.845251 | 4.464019 | 4.092175 | 0.530701799 | low  |
| TCGA-AA-A00F | 2.835616438 | 0 | 5.753495 | 6.972183 | 5.306516 | 8.239683 | 5.800856 | 5.679289 | 3.782211 | 3.444657 | 2.953293 | 0.62383446  | low  |
| TCGA-CK-4950 | 7.120547945 | 0 | 5.54123  | 6.660615 | 5.57812  | 8.428559 | 6.595788 | 5.330507 | 3.92939  | 3.096718 | 2.575287 | 0.738202386 | low  |
| TCGA-F4-6806 | 3.452054795 | 0 | 5.767048 | 6.280888 | 5.199248 | 8.693794 | 5.839483 | 5.673913 | 4.042297 | 3.81362  | 3.295636 | 0.784630461 | low  |
| TCGA-F4-6856 | 2.942465753 | 0 | 3.282718 | 6.920777 | 5.620896 | 7.938782 | 8.522043 | 5.667455 | 3.991884 | 3.272801 | 3.029283 | 0.795027239 | low  |
| TCGA-AA-A00Q | 3.501369863 | 0 | 3.291619 | 6.996373 | 5.34176  | 8.329351 | 5.993265 | 5.787044 | 4.149203 | 4.006873 | 3.563898 | 0.629554682 | low  |
| TCGA-D5-6922 | 0.843835616 | 0 | 5.440201 | 6.741876 | 4.512932 | 8.590548 | 6.777853 | 7.051956 | 4.171623 | 3.856677 | 3.830521 | 0.714467759 | low  |
| TCGA-D5-5537 | 3.783561644 | 1 | 3.923527 | 6.439521 | 4.472823 | 8.621099 | 7.557721 | 6.629192 | 4.507425 | 3.673855 | 4.279628 | 0.62845841  | low  |
| TCGA-DM-A1D4 | 7.728767123 | 1 | 7.655115 | 6.067027 | 6.050307 | 8.149543 | 6.347752 | 5.290524 | 4.644023 | 3.81439  | 2.722966 | 0.726357799 | low  |
| TCGA-AA-3950 | 2           | 0 | 3.963018 | 6.986866 | 5.772375 | 8.452667 | 8.208516 | 5.977826 | 3.501194 | 2.159874 | 2.431659 | 0.619704038 | low  |
| TCGA-D5-6532 | 1.520547945 | 0 | 3.400433 | 6.405115 | 5.758709 | 8.427289 | 5.778529 | 4.39811  | 3.70651  | 3.150068 | 3.269088 | 0.531880712 | low  |
| TCGA-AA-3831 | 1.498630137 | 0 | 5.737049 | 6.742769 | 5.752332 | 8.818347 | 6.386758 | 4.766172 | 4.393944 | 3.390311 | 2.925209 | 0.423449548 | low  |
| TCGA-CM-6171 | 1.169863014 | 0 | 3.813862 | 6.630712 | 5.202174 | 7.989069 | 5.041644 | 4.91637  | 4.186155 | 3.064828 | 5.20839  | 0.112758298 | low  |
| TCGA-AA-3970 | 3.002739726 | 0 | 5.623543 | 6.795445 | 6.150307 | 8.781194 | 6.319903 | 4.712944 | 4.304807 | 4.38479  | 2.916061 | 0.565417297 | low  |
| TCGA-DM-A1D9 | 11.69863014 | 0 | 2.661915 | 6.808238 | 5.742275 | 8.949369 | 7.802933 | 7.206409 | 3.897487 | 3.877255 | 3.432472 | 0.806756643 | low  |
| TCGA-G4-6315 | 5.15890411  | 0 | 4.575639 | 6.768602 | 5.456966 | 8.642207 | 3.880494 | 5.430626 | 4.866847 | 3.217352 | 3.938494 | 0.201384109 | low  |
| TCGA-4N-A93T | 0.4         | 0 | 3.136764 | 6.200653 | 6.006702 | 8.232286 | 4.357989 | 5.842002 | 4.478497 | 4.633179 | 2.91958  | 1.550913758 | high |
| TCGA-AA-A00K | 1.504109589 | 0 | 5.81044  | 5.906307 | 5.251455 | 8.393687 | 7.504459 | 6.232399 | 3.983442 | 3.384575 | 2.551565 | 1.833955787 | high |
| TCGA-G4-6307 | 4.58630137  | 0 | 2.73999  | 6.784413 | 4.889939 | 8.954077 | 4.013309 | 5.239777 | 4.820699 | 5.696549 | 3.463887 | 1.567820355 | high |
| TCGA-A6-2683 | 1.380821918 | 1 | 2.335644 | 5.643416 | 5.468729 | 6.836463 | 8.196102 | 4.550862 | 3.137581 | 4.982004 | 3.360398 | 4.53625522  | high |
| TCGA-DM-A285 | 0.490410959 | 1 | 3.218298 | 6.441055 | 5.35586  | 8.269564 | 4.99106  | 6.409225 | 3.8748   | 4.397611 | 2.515416 | 2.801974311 | high |
| TCGA-A6-5666 | 2.726027397 | 0 | 2.148141 | 5.755802 | 4.889059 | 8.668041 | 5.004625 | 4.422045 | 3.652065 | 3.459772 | 2.987483 | 1.958466826 | high |
| TCGA-AA-3662 | 0.504109589 | 0 | 5.339059 | 6.302806 | 5.192076 | 8.393221 | 6.948591 | 5.813101 | 3.584113 | 6.038413 | 3.215062 | 3.233890049 | high |
| TCGA-CK-5913 | 4.276712329 | 0 | 3.231435 | 6.395712 | 5.214635 | 8.514497 | 8.70592  | 5.388733 | 4.498847 | 2.967455 | 2.326831 | 1.668391232 | high |
| TCGA-AA-3492 | 0.002739726 | 1 | 4.349853 | 6.362867 | 6.054393 | 7.745553 | 8.335676 | 5.491317 | 3.93044  | 2.521069 | 2.279604 | 1.030800177 | high |
| TCGA-A6-2686 | 3.084931507 | 1 | 3.997919 | 6.504197 | 5.753114 | 8.285376 | 8.533015 | 5.603187 | 3.739942 | 3.121377 | 2.406571 | 1.31442132  | high |
| TCGA-A6-6654 | 1.989041096 | 0 | 5.56957  | 6.653986 | 4.835057 | 8.086389 | 7.8166   | 6.834627 | 2.889894 | 3.238409 | 3.070384 | 1.251199652 | high |
| TCGA-CM-5863 | 1.252054795 | 0 | 4.678897 | 6.352756 | 4.71421  | 8.329753 | 6.334897 | 6.35303  | 4.030191 | 4.508273 | 2.842097 | 2.754243486 | high |
| TCGA-AA-3506 | 4.835616438 | 0 | 7.852078 | 6.276646 | 5.08656  | 7.747133 | 7.609558 | 6.125269 | 3.953465 | 3.826711 | 3.152988 | 1.025164398 | high |
| TCGA-NH-A50U | 0.915068493 | 1 | 3.352617 | 5.202293 | 5.211527 | 8.082547 | 9.013206 | 6.445007 | 4.201862 | 3.92987  | 2.435069 | 6.633785844 | high |
| TCGA-A6-2681 | 3.8         | 0 | 3.874116 | 6.499785 | 5.715852 | 7.665367 | 7.42691  | 6.563373 | 3.596872 | 3.947805 | 3.453595 | 1.048399621 | high |
| TCGA-AU-3779 | 1.208219178 | 0 | 3.424983 | 6.301377 | 5.442422 | 8.498386 | 6.398956 | 5.44303  | 4.647891 | 4.049732 | 2.893633 | 1.400131242 | high |
| TCGA-NH-A6GC | 1.065753425 | 0 | 2.760672 | 6.202016 | 5.301097 | 8.431368 | 5.925121 | 6.75953  | 4.663788 | 4.119035 | 3.682362 | 1.087103809 | high |
| TCGA-A6-2676 | 3.575342466 | 1 | 6.361661 | 6.240306 | 5.850238 | 8.507141 | 9.14711  | 5.06388  | 3.99688  | 2.599054 | 1.94438  | 1.077548483 | high |
| TCGA-D5-6534 | 3.605479452 | 0 | 3.922042 | 6.686709 | 5.120243 | 8.120612 | 8.890758 | 6.716422 | 3.220104 | 3.311159 | 2.533082 | 2.130888521 | high |
| TCGA-F4-6807 | 3.58630137  | 0 | 3.724297 | 6.796941 | 5.554721 | 7.92883  | 8.538067 | 6.623761 | 3.853412 | 4.384236 | 3.221642 | 1.41491845  | high |
| TCGA-G4-6310 | 5.301369863 | 0 | 2.207415 | 6.881252 | 5.329554 | 8.218829 | 5.038573 | 8.902947 | 3.837505 | 3.755199 | 3.31312  | 1.312309807 | high |
| TCGA-CM-6167 | 1.249315068 | 0 | 3.839644 | 6.414709 | 5.190755 | 8.248876 | 6.975422 | 8.661658 | 3.863563 | 4.266186 | 2.974373 | 2.724910188 | high |
| TCGA-CM-6676 | 0.923287671 | 0 | 4.285174 | 6.494014 | 4.528571 | 8.546584 | 5.305302 | 6.186816 | 5.028986 | 6.023659 | 3.647985 | 2.324736849 | high |
| TCGA-A6-3809 | 2.728767123 | 0 | 3.385414 | 5.968247 | 4.803047 | 8.41726  | 7.163108 | 4.104753 | 4.620506 | 2.253035 | 2.246039 | 1.5269342   | high |
| TCGA-AA-3845 | 0           | 1 | 4.497355 | 6.705162 | 5.150775 | 8.554959 | 8.120823 | 6.191259 | 3.919363 | 3.815775 | 2.400216 | 1.998580476 | high |
| TCGA-AD-A5EK | 1.369863014 | 0 | 2.562268 | 5.951359 | 4.868171 | 7.89809  | 6.298355 | 5.441685 | 3.533531 | 3.822003 | 4.04081  | 1.198358208 | high |
| TCGA-AD-6899 | 0.482191781 | 1 | 3.293704 | 6.396086 | 5.654098 | 7.85286  | 8.769625 | 6.463158 | 4.631269 | 5.327459 | 2.62558  | 4.212662049 | high |
| TCGA-CA-5256 | 1.038356164 | 0 | 4.619748 | 6.64404  | 5.978662 | 8.376171 | 5.23314  | 4.913451 | 5.464677 | 5.92895  | 2.613414 | 1.829485365 | high |
| TCGA-AA-3554 | 1.495890411 | 0 | 4.481072 | 6.153708 | 5.772745 | 8.398769 | 6.478191 | 6.197339 | 4.021473 | 2.97961  | 2.250939 | 1.439270732 | high |
| TCGA-AA-3667 | 1.167123288 | 0 | 3.601869 | 5.287524 | 4.678611 | 7.911799 | 5.98271  | 5.846954 | 3.444507 | 4.073645 | 3.91298  | 2.256494144 | high |

|              |             |   |          |          |          |          |          |          |          |          |          |             |      |
|--------------|-------------|---|----------|----------|----------|----------|----------|----------|----------|----------|----------|-------------|------|
| TCGA-AZ-6601 | 8.334246575 | 1 | 5.440128 | 6.191172 | 5.178673 | 8.42141  | 7.135743 | 5.803508 | 4.289325 | 3.153235 | 2.323945 | 1.592944229 | high |
| TCGA-AA-A02E | 0.246575342 | 1 | 3.514254 | 6.484666 | 4.915698 | 8.271315 | 8.764871 | 6.701572 | 3.617371 | 4.104657 | 2.730016 | 3.161941153 | high |
| TCGA-AA-3692 | 3           | 1 | 5.533788 | 6.676362 | 5.245926 | 8.742934 | 5.63663  | 5.780653 | 4.045975 | 5.245832 | 3.42957  | 1.106389358 | high |
| TCGA-CM-5341 | 2.421917808 | 0 | 5.29137  | 7.524417 | 6.736081 | 8.32307  | 6.323789 | 5.674671 | 4.45686  | 6.270456 | 2.173474 | 1.606507013 | high |
| TCGA-AD-6548 | 1.780821918 | 0 | 4.178186 | 6.500042 | 5.258789 | 8.43611  | 8.592981 | 5.787111 | 3.885516 | 3.401168 | 2.455616 | 1.756732475 | high |
| TCGA-AA-3930 | 0.167123288 | 1 | 2.941902 | 7.132188 | 6.19655  | 8.03845  | 6.544272 | 6.150867 | 4.364147 | 3.547311 | 2.028713 | 1.277751075 | high |
| TCGA-A6-6782 | 1.690410959 | 0 | 2.969364 | 6.141732 | 5.417424 | 8.52512  | 6.776194 | 5.890229 | 3.842194 | 4.168388 | 3.545075 | 1.254025826 | high |
| TCGA-AM-5821 | 0.076712329 | 0 | 2.98261  | 5.849299 | 4.055206 | 8.41887  | 9.463436 | 6.129165 | 3.246072 | 2.439287 | 1.912663 | 6.754669242 | high |
| TCGA-D5-6926 | 0.753424658 | 0 | 2.999672 | 6.662047 | 4.527953 | 7.790415 | 6.653603 | 7.221721 | 3.068273 | 4.689751 | 3.965767 | 1.996578865 | high |
| TCGA-AA-3860 | 2.589041096 | 0 | 4.085487 | 6.262926 | 4.74459  | 8.575795 | 6.630068 | 5.649847 | 4.532075 | 3.648667 | 3.064763 | 1.377856983 | high |
| TCGA-AA-A00R | 0.082191781 | 0 | 5.480468 | 6.287307 | 5.493488 | 8.639182 | 9.597249 | 5.397216 | 4.542367 | 3.038979 | 1.917525 | 1.69890356  | high |
| TCGA-AA-A00N | 0.334246575 | 1 | 3.357794 | 6.500943 | 5.027973 | 8.389013 | 6.945463 | 6.624637 | 3.987904 | 4.117762 | 2.49374  | 3.045844091 | high |
| TCGA-AA-3715 | 1.58630137  | 1 | 3.281245 | 5.56955  | 4.328188 | 7.896787 | 9.408893 | 5.415304 | 2.995804 | 3.251577 | 2.224656 | 8.09556977  | high |
| TCGA-A6-6649 | 2.01369863  | 0 | 3.663097 | 6.724402 | 5.593584 | 8.036144 | 7.557113 | 6.547721 | 3.712381 | 4.687795 | 3.666705 | 1.095137498 | high |
| TCGA-F4-6805 | 2.868493151 | 0 | 4.259782 | 6.03848  | 5.453205 | 8.20786  | 7.935232 | 7.460807 | 3.622878 | 3.4355   | 3.008405 | 1.748901279 | high |
| TCGA-A6-2674 | 3.646575342 | 0 | 3.038428 | 6.126447 | 5.097127 | 7.860172 | 5.55923  | 5.95342  | 4.262439 | 3.23513  | 2.707468 | 1.898084937 | high |
| TCGA-AA-3552 | 1.084931507 | 1 | 4.30932  | 6.618225 | 5.559696 | 8.589913 | 8.391403 | 5.976609 | 3.929805 | 4.71699  | 3.127572 | 1.454213797 | high |
| TCGA-CM-5861 | 1.252054795 | 0 | 3.095407 | 6.565304 | 5.139721 | 8.276419 | 7.816517 | 6.46343  | 3.292714 | 3.945331 | 2.961935 | 2.106024605 | high |
| TCGA-AA-A017 | 1.252054795 | 0 | 4.856007 | 6.409516 | 5.304029 | 8.47031  | 6.203088 | 5.709819 | 4.179906 | 5.302442 | 3.12517  | 1.947269776 | high |
| TCGA-CM-5349 | 2.506849315 | 0 | 4.747027 | 6.172351 | 5.235788 | 8.968921 | 7.367172 | 7.453122 | 3.542755 | 4.549587 | 3.615964 | 1.455072475 | high |
| TCGA-D5-5538 | 4.550684932 | 1 | 3.387682 | 5.95757  | 5.478189 | 8.50751  | 8.600007 | 5.935814 | 4.12606  | 2.907409 | 2.730038 | 1.472451668 | high |
| TCGA-CK-6747 | 2.246575342 | 0 | 4.177032 | 6.519418 | 5.303594 | 8.473248 | 8.006419 | 5.196603 | 4.797337 | 3.493129 | 2.4929   | 1.316202621 | high |
| TCGA-D5-6530 | 1.701369863 | 0 | 4.164994 | 6.703278 | 5.279798 | 8.221656 | 8.616984 | 4.369314 | 4.000403 | 3.769393 | 2.367241 | 1.695255212 | high |
| TCGA-A6-5664 | 1.84109589  | 0 | 6.558297 | 6.671827 | 4.636494 | 8.31674  | 6.334015 | 6.617475 | 4.035135 | 3.779547 | 3.120759 | 1.050368987 | high |
| TCGA-AA-3872 | 0           | 0 | 3.244579 | 6.929864 | 5.432989 | 7.732918 | 6.790793 | 6.918527 | 3.280206 | 4.41987  | 2.444799 | 3.116474261 | high |
| TCGA-AD-6895 | 2.090410959 | 0 | 2.509229 | 5.920903 | 4.615902 | 8.215938 | 9.390607 | 6.209121 | 3.524941 | 2.898981 | 2.365705 | 4.471603128 | high |
| TCGA-AU-6004 | 2.257534247 | 0 | 4.645862 | 6.653866 | 5.126627 | 8.050608 | 9.004067 | 5.948577 | 3.854731 | 3.027616 | 2.518603 | 1.440950258 | high |
| TCGA-AA-3684 | 0           | 0 | 6.34528  | 5.633769 | 5.465583 | 7.609327 | 7.05111  | 6.070067 | 3.220734 | 4.2914   | 2.75374  | 3.022622083 | high |
| TCGA-AA-3812 | 2.920547945 | 0 | 7.01477  | 5.654519 | 5.308428 | 7.82734  | 6.301406 | 5.930223 | 3.200406 | 3.842428 | 3.152483 | 1.530734893 | high |
| TCGA-A6-2671 | 3.646575342 | 1 | 2.623911 | 6.42374  | 5.230094 | 7.418813 | 8.824994 | 6.877616 | 3.33506  | 3.945889 | 3.315285 | 2.30032511  | high |
| TCGA-D5-6531 | 1.479452055 | 0 | 2.709374 | 6.179742 | 4.489398 | 7.940211 | 8.525048 | 5.156362 | 3.88709  | 3.021891 | 3.186366 | 1.748320798 | high |
| TCGA-CK-6748 | 0.167123288 | 0 | 2.619175 | 6.591293 | 4.525378 | 8.105665 | 5.988824 | 6.699394 | 3.504612 | 5.587789 | 2.975166 | 6.134644957 | high |
| TCGA-AA-3496 | 0.084931507 | 0 | 4.274424 | 6.058746 | 4.983528 | 7.970924 | 6.537511 | 5.820556 | 4.07162  | 5.13747  | 3.67176  | 2.080655387 | high |
| TCGA-A6-6142 | 2.090410959 | 0 | 2.445094 | 7.122566 | 4.566564 | 8.351016 | 6.479753 | 6.509324 | 3.413484 | 4.740745 | 2.983675 | 2.836302961 | high |
| TCGA-CM-4747 | 2.084931507 | 0 | 3.756105 | 6.085186 | 4.776801 | 7.471174 | 6.304265 | 5.934353 | 3.587994 | 4.97326  | 3.115548 | 4.311582048 | high |
| TCGA-A6-5661 | 2.794520548 | 0 | 5.119606 | 5.818528 | 4.241525 | 7.023074 | 4.330718 | 4.747127 | 4.776995 | 2.425361 | 3.084827 | 1.128224486 | high |
| TCGA-AD-6901 | 1.868493151 | 1 | 2.827441 | 6.631483 | 5.177487 | 7.961715 | 7.876688 | 6.777966 | 3.307122 | 4.60532  | 3.819458 | 1.536613618 | high |
| TCGA-DM-A28A | 2.205479452 | 1 | 2.234964 | 6.166984 | 5.378695 | 7.890145 | 6.614537 | 6.407663 | 3.357719 | 3.441535 | 3.609765 | 1.210355511 | high |
| TCGA-G4-6304 | 4.468493151 | 0 | 2.556777 | 6.619676 | 5.689652 | 8.240727 | 8.606169 | 4.800787 | 3.83267  | 4.019181 | 2.585427 | 1.843547749 | high |
| TCGA-AA-3870 | 2.498630137 | 0 | 3.492427 | 6.682722 | 5.174517 | 8.259986 | 8.220351 | 6.593397 | 4.13015  | 3.200879 | 2.564929 | 1.61086849  | high |
| TCGA-AA-3710 | 2.249315068 | 0 | 3.996888 | 6.320733 | 5.868029 | 8.628255 | 8.821772 | 4.981603 | 3.777207 | 2.95339  | 2.300925 | 1.214920058 | high |
| TCGA-CM-6677 | 0.923287671 | 0 | 2.796659 | 6.564666 | 5.762208 | 8.516711 | 6.114463 | 5.582373 | 4.315147 | 3.413059 | 1.969411 | 1.864282546 | high |
| TCGA-AA-3966 | 0.167123288 | 0 | 3.964556 | 5.663695 | 5.746895 | 8.557076 | 6.576105 | 5.841731 | 3.235147 | 4.683351 | 3.558297 | 1.706900718 | high |
| TCGA-G4-6299 | 6.21369863  | 0 | 3.837972 | 6.300413 | 5.381278 | 8.17714  | 7.731028 | 6.276663 | 3.392038 | 4.914271 | 3.393208 | 2.15839168  | high |
| TCGA-AA-3856 | 0.082191781 | 0 | 5.460329 | 7.088982 | 5.321018 | 8.559596 | 7.043253 | 5.50274  | 4.096273 | 4.863942 | 2.939728 | 1.128048151 | high |
| TCGA-DM-A0XD | 2.035616438 | 1 | 3.237916 | 5.926311 | 5.008157 | 8.619116 | 8.406945 | 5.954317 | 3.407666 | 3.277215 | 2.468094 | 3.1497381   | high |
| TCGA-AZ-6607 | 0.265753425 | 1 | 3.750041 | 6.614805 | 4.138176 | 7.695659 | 8.133929 | 6.496966 | 3.620049 | 5.721126 | 2.051548 | 17.06780936 | high |
| TCGA-AD-6890 | 2.043835616 | 0 | 6.26701  | 6.576045 | 5.126576 | 8.316444 | 6.908982 | 6.009905 | 4.43701  | 3.780201 | 2.169452 | 1.804043133 | high |
| TCGA-AA-3489 | 0.58630137  | 1 | 2.515702 | 6.289473 | 5.007163 | 7.620011 | 7.197334 | 6.371109 | 3.669385 | 3.538515 | 2.821214 | 2.726890827 | high |
| TCGA-3L-AA1B | 1.301369863 | 0 | 3.524078 | 6.165577 | 4.929179 | 8.187618 | 6.330141 | 6.22541  | 4.048898 | 3.912438 | 3.640393 | 1.255012051 | high |
| TCGA-AA-3527 | 0           | 0 | 6.221888 | 5.594085 | 4.570038 | 6.881225 | 7.874743 | 5.390563 | 2.764796 | 4.489348 | 2.641479 | 7.140225603 | high |

|              |             |   |          |          |          |          |          |          |          |          |          |             |      |
|--------------|-------------|---|----------|----------|----------|----------|----------|----------|----------|----------|----------|-------------|------|
| TCGA-D5-6924 | 1.191780822 | 0 | 4.056105 | 6.255872 | 4.607406 | 7.836028 | 6.796504 | 6.851438 | 4.105394 | 4.5491   | 3.61045  | 2.14648063  | high |
| TCGA-AA-A01C | 1.252054795 | 0 | 2.98538  | 6.592068 | 4.983001 | 8.315692 | 6.753387 | 6.433515 | 3.857481 | 3.695698 | 3.004766 | 1.646069972 | high |
| TCGA-AA-3852 | 0           | 1 | 3.050263 | 6.562051 | 4.89077  | 8.486575 | 6.443593 | 5.787122 | 3.80381  | 3.356482 | 2.486882 | 2.006574048 | high |
| TCGA-AZ-4313 | 6.328767123 | 0 | 2.810299 | 6.518053 | 5.357251 | 8.503075 | 5.071143 | 5.482265 | 3.952218 | 3.792078 | 2.398852 | 1.946069073 | high |
| TCGA-NH-A5IV | 0           | 0 | 3.780369 | 6.35578  | 4.950288 | 8.161487 | 6.235788 | 5.470029 | 4.451981 | 4.340218 | 2.398769 | 3.164282757 | high |
| TCGA-CM-6164 | 2.419178082 | 0 | 2.903277 | 6.62504  | 4.880151 | 8.54974  | 6.326115 | 6.840993 | 4.01565  | 3.74408  | 3.520455 | 1.089139664 | high |
| TCGA-CK-6751 | 1.419178082 | 0 | 3.226911 | 6.14714  | 5.515077 | 8.451775 | 7.983762 | 5.749182 | 4.288142 | 2.697402 | 2.453069 | 1.392778301 | high |
| TCGA-AA-A01R | 2.917808219 | 0 | 5.560868 | 5.222667 | 4.745626 | 8.14049  | 9.016863 | 5.670229 | 3.663354 | 3.863651 | 1.928777 | 8.85485914  | high |
| TCGA-CM-6680 | 1.002739726 | 0 | 4.08922  | 6.371462 | 5.054173 | 8.532016 | 7.839676 | 5.791615 | 4.339349 | 4.362704 | 3.194939 | 1.592922788 | high |
| TCGA-D5-6928 | 0.969863014 | 0 | 8.088269 | 5.903416 | 4.949594 | 7.636764 | 9.051782 | 5.990364 | 3.29166  | 3.882357 | 3.159232 | 1.658523126 | high |
| TCGA-5M-AAT4 | 0.134246575 | 1 | 2.350116 | 6.275081 | 5.074668 | 8.078203 | 5.272307 | 6.148025 | 4.561513 | 3.717446 | 3.101433 | 1.605755528 | high |
| TCGA-AM-5820 | 0.038356164 | 0 | 5.019888 | 5.962754 | 4.511883 | 8.65332  | 5.523393 | 7.257214 | 5.066961 | 2.575316 | 2.413606 | 1.744316597 | high |
| TCGA-F4-6459 | 0.717808219 | 1 | 4.820174 | 6.633555 | 4.712757 | 8.349548 | 5.678788 | 7.38363  | 3.802809 | 5.918025 | 2.945963 | 4.720516762 | high |
| TCGA-AA-A00A | 3.169863014 | 0 | 3.517713 | 5.8873   | 5.257585 | 8.438713 | 8.45394  | 5.281382 | 4.368719 | 3.021713 | 2.769824 | 1.529352462 | high |
| TCGA-AA-3655 | 5.084931507 | 0 | 3.24777  | 6.915127 | 4.662431 | 8.397025 | 8.745401 | 5.485839 | 4.353958 | 3.502316 | 2.945279 | 1.311658857 | high |
| TCGA-CM-6166 | 1.832876712 | 0 | 2.720032 | 6.014569 | 5.107481 | 8.572196 | 7.711434 | 6.149362 | 3.701816 | 3.18365  | 3.305573 | 1.367756241 | high |
| TCGA-DM-A1D8 | 1.049315068 | 1 | 2.471857 | 5.85882  | 5.930262 | 8.322491 | 8.240443 | 5.393374 | 3.730951 | 3.785776 | 3.425471 | 1.226852166 | high |
| TCGA-F4-6570 | 0.515068493 | 1 | 6.982329 | 6.071009 | 4.489758 | 8.154026 | 8.670699 | 6.032932 | 3.835841 | 2.853578 | 3.020755 | 1.204317864 | high |
| TCGA-AA-A01X | 2.167123288 | 0 | 3.877141 | 6.694697 | 4.328547 | 7.568645 | 7.556419 | 6.486228 | 3.585402 | 5.096903 | 3.649667 | 2.80044753  | high |
| TCGA-AD-6963 | 2.284931507 | 0 | 2.808904 | 6.772402 | 4.754259 | 8.797906 | 6.28435  | 4.679192 | 3.748359 | 3.842597 | 2.906894 | 1.413850701 | high |
| TCGA-AA-3811 | 0.838356164 | 1 | 4.689186 | 6.685935 | 5.789446 | 8.29473  | 6.992186 | 5.142651 | 3.414011 | 4.079825 | 2.485174 | 1.429278819 | high |
| TCGA-A6-5662 | 1.967123288 | 0 | 2.499816 | 7.078777 | 5.292539 | 7.9076   | 5.014011 | 6.327269 | 3.821828 | 4.888886 | 3.164105 | 1.715250824 | high |
| TCGA-DM-A0XF | 3.183561644 | 1 | 5.180337 | 6.93476  | 5.441057 | 8.09652  | 7.532436 | 6.585741 | 4.223232 | 4.588003 | 3.144389 | 1.13657082  | high |
| TCGA-A6-4105 | 1.210958904 | 1 | 3.248293 | 6.436282 | 5.110301 | 8.281359 | 6.905137 | 5.999524 | 3.90688  | 3.239382 | 2.772525 | 1.519982873 | high |
| TCGA-D5-6535 | 1.260273973 | 0 | 3.057847 | 6.82387  | 5.287387 | 7.980191 | 7.148288 | 4.806578 | 4.746375 | 3.484402 | 2.812957 | 0.988212725 | high |
| TCGA-A6-A56B | 4.687671233 | 1 | 3.218581 | 5.897623 | 4.642568 | 7.509583 | 5.199223 | 6.370981 | 3.921226 | 4.461885 | 3.87194  | 2.143899666 | high |
| TCGA-D5-6536 | 1.487671233 | 0 | 2.121489 | 5.667147 | 4.404613 | 7.674625 | 6.068506 | 6.258729 | 3.480202 | 3.662095 | 3.043566 | 4.713677321 | high |
| TCGA-D5-6529 | 1.682191781 | 0 | 4.376323 | 6.408847 | 4.714296 | 8.361005 | 8.381479 | 5.729129 | 4.52928  | 3.205794 | 2.882051 | 1.347424968 | high |
| TCGA-D5-6931 | 1           | 0 | 5.256498 | 6.546847 | 4.937471 | 8.244281 | 7.69471  | 5.419884 | 4.063562 | 3.128249 | 2.582624 | 1.246351273 | high |
| TCGA-DM-A1HA | 7.123287671 | 0 | 2.214634 | 6.251711 | 4.047578 | 8.132535 | 8.231515 | 5.172398 | 3.571279 | 2.971325 | 2.50872  | 3.835164435 | high |
| TCGA-AA-3837 | 3.249315068 | 0 | 4.02244  | 6.291756 | 5.011792 | 8.248612 | 7.18235  | 6.552627 | 4.323008 | 3.408324 | 3.086903 | 1.340253623 | high |
| TCGA-G4-6314 | 2.994520548 | 0 | 2.982045 | 6.716538 | 4.714466 | 7.998578 | 6.966393 | 7.829556 | 4.200852 | 3.872439 | 3.784274 | 1.206711096 | high |
| TCGA-D5-5540 | 4.673972603 | 0 | 2.203071 | 6.682935 | 5.581804 | 8.032148 | 5.392188 | 6.660566 | 4.101655 | 3.247486 | 2.856852 | 1.137893841 | high |
| TCGA-DM-A288 | 1.169863014 | 1 | 3.233412 | 5.687531 | 5.695254 | 7.79359  | 3.731782 | 4.759214 | 4.087232 | 3.270199 | 2.865358 | 1.291172508 | high |
| TCGA-AD-5900 | 1.01369863  | 0 | 2.982619 | 5.790937 | 4.868985 | 8.275861 | 8.978335 | 6.285022 | 3.629081 | 2.751675 | 2.674876 | 2.753130857 | high |
| TCGA-G4-6317 | 3           | 0 | 3.302737 | 6.687608 | 5.638654 | 8.660918 | 4.660916 | 5.563719 | 4.671877 | 5.518181 | 3.397269 | 1.212634256 | high |
| TCGA-CA-5255 | 1.030136986 | 0 | 3.962269 | 6.183728 | 5.524949 | 8.226135 | 7.84152  | 4.5408   | 4.087255 | 3.279161 | 2.581771 | 1.342918495 | high |
| TCGA-G4-6627 | 5.95890411  | 0 | 4.903921 | 6.557117 | 5.089672 | 8.241017 | 8.716157 | 7.191692 | 4.742818 | 3.219088 | 2.875786 | 1.171290962 | high |
| TCGA-AA-A00O | 2.252054795 | 0 | 3.117312 | 6.132526 | 5.231004 | 7.875252 | 7.942948 | 6.304903 | 2.854908 | 3.51241  | 3.579618 | 1.451748986 | high |
| TCGA-AZ-4323 | 0.117808219 | 1 | 4.707593 | 6.506938 | 4.876215 | 7.983113 | 7.625951 | 6.532721 | 2.924562 | 3.6407   | 3.011819 | 1.861137559 | high |
| TCGA-AA-3542 | 1.082191781 | 0 | 6.615124 | 6.214605 | 5.508036 | 8.817996 | 4.799782 | 6.063709 | 3.963629 | 6.104417 | 2.701241 | 3.070122304 | high |
| TCGA-AA-A022 | 0           | 0 | 4.419777 | 5.862968 | 4.819563 | 8.6212   | 8.786203 | 5.660299 | 3.180405 | 3.926972 | 2.083759 | 5.917367422 | high |
| TCGA-DM-A0X9 | 9.975342466 | 0 | 3.140193 | 5.920368 | 5.085322 | 8.358837 | 6.514331 | 4.832465 | 3.544837 | 3.250939 | 3.392553 | 1.124038603 | high |
| TCGA-AA-3994 | 2.252054795 | 0 | 3.054675 | 6.7197   | 5.194889 | 8.634331 | 6.172695 | 5.334907 | 3.801889 | 3.459719 | 2.603425 | 1.346939217 | high |
| TCGA-D5-6923 | 1.035616438 | 0 | 3.822791 | 6.440574 | 4.799314 | 7.966491 | 5.857296 | 6.179823 | 3.940181 | 4.1053   | 3.587917 | 1.287082016 | high |
| TCGA-AD-6888 | 1.293150685 | 1 | 3.954127 | 6.205977 | 4.76318  | 8.28884  | 7.301422 | 5.182727 | 4.095011 | 4.409438 | 3.225673 | 2.02955762  | high |
| TCGA-D5-7000 | 0.854794521 | 0 | 2.504916 | 6.326674 | 5.136275 | 8.32012  | 8.109294 | 5.762343 | 4.233867 | 3.128958 | 2.887983 | 1.488584044 | high |
| TCGA-CK-4948 | 12.33424658 | 0 | 4.92325  | 6.43834  | 4.58653  | 8.420432 | 6.145769 | 6.876878 | 4.227281 | 4.671006 | 2.531406 | 3.806087522 | high |
| TCGA-CM-4746 | 3.084931507 | 0 | 3.598849 | 6.228719 | 5.926764 | 8.614049 | 7.354345 | 4.885188 | 4.221983 | 4.350013 | 2.45496  | 1.934559698 | high |
| TCGA-AZ-6608 | 0.161643836 | 1 | 2.011919 | 6.559507 | 5.423734 | 8.773304 | 3.674536 | 6.039537 | 4.1258   | 4.858179 | 3.22281  | 1.571890203 | high |
| TCGA-AA-A02J | 0.419178082 | 1 | 4.202392 | 6.287327 | 4.769236 | 8.351369 | 4.114174 | 5.463038 | 4.194185 | 5.009861 | 3.881866 | 1.209978263 | high |

|              |             |   |          |          |          |          |           |          |          |          |          |             |      |
|--------------|-------------|---|----------|----------|----------|----------|-----------|----------|----------|----------|----------|-------------|------|
| TCGA-AA-3516 | 1.084931507 | 1 | 3.142157 | 6.50014  | 5.171621 | 8.493084 | 7.166759  | 4.346827 | 3.744509 | 2.663352 | 2.106417 | 1.534106087 | high |
| TCGA-A6-6651 | 1.81369863  | 0 | 5.208372 | 6.033998 | 4.796483 | 8.04856  | 7.22677   | 7.987387 | 3.462681 | 3.640005 | 3.29883  | 2.016777636 | high |
| TCGA-DM-A1DA | 0.624657534 | 1 | 2.771392 | 5.549991 | 5.760286 | 8.345017 | 8.781856  | 4.939944 | 4.022358 | 2.924468 | 2.226614 | 2.565878117 | high |
| TCGA-CK-5916 | 1.761643836 | 1 | 2.720455 | 6.035744 | 5.041166 | 8.146184 | 7.140891  | 5.349986 | 4.29792  | 2.367505 | 2.397233 | 1.736585527 | high |
| TCGA-AZ-6599 | 0.564383562 | 1 | 2.434439 | 6.306733 | 4.984149 | 8.569853 | 5.771588  | 4.062996 | 4.320336 | 4.167969 | 3.332005 | 1.235729122 | high |
| TCGA-CA-5254 | 1.057534247 | 0 | 5.459606 | 7.043082 | 4.548272 | 7.907046 | 7.961296  | 6.041683 | 4.486553 | 3.354556 | 2.661804 | 1.247557357 | high |
| TCGA-DM-A280 | 0.646575342 | 1 | 4.535067 | 6.159556 | 5.102257 | 8.712525 | 4.91505   | 5.874789 | 4.135372 | 2.564152 | 2.093289 | 1.496962947 | high |
| TCGA-QG-A5YW | 2.454794521 | 0 | 3.189274 | 6.266181 | 5.686554 | 8.439386 | 5.737733  | 5.237583 | 4.453154 | 3.817048 | 2.094291 | 2.242653228 | high |
| TCGA-AA-A029 | 4.331506849 | 0 | 3.144826 | 5.744606 | 4.848623 | 8.197698 | 5.795698  | 4.193832 | 3.705744 | 2.960544 | 2.217621 | 2.913592795 | high |
| TCGA-AA-3984 | 0           | 0 | 3.606831 | 6.881864 | 5.035958 | 8.829968 | 6.928107  | 5.403369 | 4.233871 | 3.52768  | 2.756276 | 1.047894042 | high |
| TCGA-AA-A00U | 1.419178082 | 0 | 2.526926 | 6.214225 | 5.141935 | 8.770466 | 8.45771   | 6.316589 | 4.245788 | 3.911239 | 3.350033 | 1.567814118 | high |
| TCGA-AA-A02H | 0.167123288 | 1 | 4.120497 | 6.214451 | 4.738319 | 8.201578 | 5.630875  | 6.777037 | 4.106178 | 4.287492 | 3.239414 | 2.115632115 | high |
| TCGA-D5-5539 | 1.632876712 | 0 | 3.509647 | 6.564628 | 5.235001 | 8.349357 | 5.835889  | 5.621797 | 3.454011 | 3.850672 | 2.662651 | 1.795437972 | high |
| TCGA-AA-3562 | 1.665753425 | 0 | 5.587448 | 7.240896 | 5.966634 | 8.319943 | 5.591259  | 5.708356 | 3.718664 | 4.942736 | 2.556018 | 1.113831646 | high |
| TCGA-CM-4744 | 1.668493151 | 0 | 4.466183 | 6.584106 | 4.889266 | 8.913795 | 8.864663  | 6.760165 | 4.134392 | 2.588791 | 2.149263 | 1.681541876 | high |
| TCGA-NH-A8F8 | 1.4         | 1 | 3.282137 | 6.138004 | 4.957625 | 7.88772  | 7.086975  | 6.730968 | 4.172053 | 4.240546 | 3.636298 | 1.776308006 | high |
| TCGA-CA-6719 | 1.191780822 | 0 | 2.58275  | 6.567966 | 4.963883 | 8.108541 | 5.937648  | 6.508557 | 3.39832  | 4.281622 | 3.380741 | 1.876628868 | high |
| TCGA-CA-6718 | 0.838356164 | 1 | 4.58796  | 6.33005  | 4.921775 | 8.168076 | 8.942682  | 6.11946  | 3.07205  | 2.86251  | 2.950731 | 1.424047747 | high |
| TCGA-AA-A01K | 2.583561644 | 0 | 5.663151 | 6.09372  | 5.081343 | 7.949689 | 6.904126  | 6.169028 | 4.002178 | 3.967778 | 2.955585 | 1.799469076 | high |
| TCGA-DM-A28K | 8.18630137  | 0 | 3.267123 | 6.424657 | 5.618494 | 8.617294 | 4.312484  | 5.228736 | 3.726004 | 3.598526 | 2.513299 | 1.32254462  | high |
| TCGA-F4-6855 | 3.950684932 | 0 | 2.978448 | 6.214491 | 4.695354 | 7.563374 | 6.772596  | 6.997867 | 3.873859 | 3.178989 | 3.64774  | 1.358600372 | high |
| TCGA-D5-6541 | 1.298630137 | 0 | 3.713865 | 6.478213 | 5.862572 | 8.484452 | 10.098702 | 6.178562 | 3.790221 | 3.67602  | 2.813274 | 1.369980903 | high |
| TCGA-AA-3841 | 3.079452055 | 0 | 5.720801 | 5.637022 | 5.169015 | 7.67163  | 6.947391  | 5.059991 | 3.490449 | 4.202786 | 3.417396 | 1.720171618 | high |
| TCGA-4T-AA8H | 1.054794521 | 0 | 4.111511 | 6.155526 | 5.477168 | 8.606215 | 3.846782  | 4.946979 | 4.245523 | 4.650432 | 3.072721 | 1.341800531 | high |
| TCGA-AA-3696 | 0.419178082 | 1 | 4.046401 | 5.959753 | 5.306893 | 8.340762 | 5.994537  | 7.35375  | 3.771475 | 5.128409 | 3.165458 | 3.405337119 | high |
| TCGA-AA-3549 | 1.750684932 | 0 | 2.516362 | 6.276564 | 5.663608 | 7.719962 | 6.535107  | 5.173455 | 3.789997 | 3.29604  | 3.071599 | 1.133158071 | high |
| TCGA-A6-2685 | 3.104109589 | 0 | 6.154674 | 6.327691 | 5.996654 | 7.151953 | 7.079175  | 8.175149 | 3.901413 | 4.219738 | 2.915414 | 1.697803255 | high |
| TCGA-AA-A02O | 0.076712329 | 0 | 4.134789 | 6.020912 | 4.661456 | 8.092253 | 8.542569  | 5.025883 | 3.453942 | 4.246628 | 3.377019 | 2.308283039 | high |
| TCGA-D5-6540 | 1.345205479 | 0 | 3.605992 | 6.013711 | 4.821445 | 8.182397 | 9.022601  | 5.902997 | 3.738278 | 3.086975 | 3.730102 | 1.048539773 | high |
| TCGA-CA-6715 | 1.049315068 | 0 | 3.025776 | 6.111213 | 4.965449 | 8.589696 | 4.502835  | 5.905949 | 4.933563 | 3.917556 | 3.552596 | 1.012989362 | high |
| TCGA-DM-A1D6 | 1.561643836 | 1 | 2.135229 | 5.472397 | 5.387244 | 8.113103 | 3.947318  | 4.676952 | 4.247247 | 3.675271 | 3.375587 | 1.443183935 | high |
| TCGA-AA-A02R | 1.835616438 | 1 | 2.924154 | 5.864594 | 4.731575 | 8.331885 | 9.943774  | 5.106557 | 3.568301 | 2.944814 | 2.403197 | 3.549654182 | high |
| TCGA-AY-A8YK | 1.569863014 | 0 | 4.262824 | 6.552997 | 5.35806  | 8.593028 | 4.657164  | 4.800821 | 4.517009 | 5.385118 | 3.347068 | 1.223557937 | high |
| TCGA-AA-3848 | 0.838356164 | 1 | 3.301636 | 5.256693 | 5.372428 | 7.374502 | 7.195657  | 4.685344 | 3.014774 | 3.967556 | 3.594059 | 2.328966654 | high |
| TCGA-F4-6463 | 2.978082192 | 0 | 4.142554 | 6.815318 | 4.566664 | 8.534271 | 6.379222  | 6.453037 | 3.92951  | 4.098562 | 3.103253 | 1.567370938 | high |
| TCGA-AA-3867 | 2.002739726 | 0 | 5.228946 | 6.953487 | 4.965142 | 8.119675 | 5.69348   | 6.529801 | 3.670766 | 6.064507 | 3.318236 | 2.447122137 | high |
| TCGA-AA-A01S | 0.084931507 | 0 | 2.319618 | 6.286349 | 5.944885 | 8.530112 | 4.001646  | 4.010998 | 4.420335 | 5.495346 | 3.252937 | 1.434073431 | high |
| TCGA-AA-3514 | 0.084931507 | 0 | 7.943146 | 5.288441 | 4.387643 | 7.330855 | 6.332654  | 6.278837 | 3.110036 | 5.063881 | 2.633203 | 8.781184972 | high |
| TCGA-AY-6196 | 0.016438356 | 0 | 4.492549 | 6.063023 | 4.792391 | 7.770517 | 7.770537  | 7.038077 | 3.098063 | 4.907395 | 3.4442   | 3.68217537  | high |
| TCGA-A6-6652 | 2.057534247 | 0 | 1.883151 | 6.647272 | 4.130499 | 7.967469 | 5.022154  | 5.372724 | 3.489051 | 5.1998   | 3.587011 | 3.252166571 | high |
| TCGA-A6-3808 | 2.778082192 | 0 | 4.132649 | 6.556008 | 5.604782 | 8.297674 | 7.861776  | 7.330286 | 3.794146 | 3.019203 | 2.441277 | 1.479564616 | high |
| TCGA-AD-6964 | 0.906849315 | 1 | 4.503282 | 6.426279 | 5.03367  | 8.225014 | 7.710573  | 6.247269 | 3.521731 | 4.018506 | 2.763471 | 2.296122174 | high |
| TCGA-AA-3833 | 1.328767123 | 0 | 4.391603 | 7.04544  | 5.340568 | 8.522223 | 7.126713  | 6.087727 | 3.975286 | 3.021259 | 2.366371 | 0.976075678 | high |
| TCGA-5M-AAT6 | 0.794520548 | 1 | 3.288062 | 6.082137 | 5.244311 | 8.229383 | 9.983084  | 6.155675 | 3.176734 | 3.70769  | 2.313613 | 4.48322365  | high |
| TCGA-F4-6460 | 2.663013699 | 1 | 5.636566 | 7.288941 | 5.298139 | 7.749627 | 6.127936  | 7.694015 | 3.595987 | 4.818483 | 3.372974 | 1.084307075 | high |
| TCGA-AZ-4616 | 0.42739726  | 1 | 3.137182 | 6.19905  | 4.555191 | 8.489984 | 9.092502  | 6.057657 | 4.0389   | 3.182586 | 2.27611  | 3.699545522 | high |
| TCGA-AZ-4614 | 0.471232877 | 1 | 3.631255 | 6.132045 | 5.406365 | 8.197602 | 7.90934   | 6.4237   | 3.745783 | 3.440332 | 2.392861 | 2.654806286 | high |
| TCGA-AA-3673 | 4.169863014 | 0 | 4.010562 | 6.985525 | 5.445323 | 8.452929 | 7.011906  | 5.343107 | 4.202019 | 4.87946  | 2.769634 | 1.570649338 | high |
| TCGA-AA-3973 | 1.087671233 | 0 | 2.49842  | 6.162046 | 5.152236 | 7.974592 | 4.63933   | 5.833408 | 3.928131 | 4.50038  | 3.434359 | 1.888016324 | high |
| TCGA-AY-4070 | 1.35890411  | 1 | 4.953428 | 6.766645 | 4.802835 | 8.419857 | 6.028514  | 6.138052 | 3.663401 | 5.389899 | 2.818537 | 3.083108898 | high |
| TCGA-AA-3952 | 0.167123288 | 1 | 2.458114 | 6.339848 | 5.814861 | 8.330434 | 8.644711  | 6.537982 | 4.431863 | 3.757149 | 2.416908 | 2.352595189 | high |



|              |             |   |          |          |          |          |           |          |          |          |          |             |      |
|--------------|-------------|---|----------|----------|----------|----------|-----------|----------|----------|----------|----------|-------------|------|
| TCGA-AA-3529 | 0           | 1 | 6.04673  | 6.787453 | 4.972364 | 8.030889 | 4.51771   | 5.782337 | 3.823002 | 5.456372 | 2.628515 | 2.704206519 | high |
| TCGA-NH-A50V | 1.610958904 | 0 | 2.924139 | 6.63567  | 5.654965 | 8.349412 | 8.679622  | 6.04363  | 3.871188 | 4.322144 | 3.426558 | 1.157313686 | high |
| TCGA-AA-3502 | 2.917808219 | 0 | 3.420943 | 6.767352 | 4.951655 | 8.307347 | 5.081153  | 4.634181 | 3.748043 | 4.341817 | 3.035869 | 1.391100173 | high |
| TCGA-SS-A7HO | 5.010958904 | 0 | 4.379112 | 6.271706 | 5.151251 | 8.142867 | 5.748149  | 5.300048 | 3.345076 | 4.713384 | 3.564768 | 1.437901053 | high |
| TCGA-AA-A01Q | 0.084931507 | 0 | 3.24723  | 6.381224 | 5.324297 | 8.502525 | 6.790204  | 4.165728 | 3.9707   | 3.600582 | 2.848936 | 1.172127496 | high |
| TCGA-AA-3553 | 2           | 0 | 5.435578 | 6.786688 | 5.389942 | 8.274756 | 6.065136  | 5.567876 | 4.626533 | 5.038027 | 2.792428 | 1.500561119 | high |
| TCGA-CK-6746 | 0           | 0 | 2.24662  | 6.342895 | 5.670163 | 8.774801 | 10.161661 | 3.847347 | 3.644665 | 2.844875 | 2.529211 | 1.214269025 | high |
| TCGA-CA-6717 | 1.063013699 | 0 | 3.622739 | 6.662661 | 5.225745 | 8.109136 | 6.169522  | 7.105671 | 3.765119 | 2.659999 | 2.477072 | 1.348652616 | high |
| TCGA-G4-6298 | 0           | 1 | 3.407306 | 6.603603 | 4.424847 | 7.908564 | 4.658149  | 6.750823 | 4.313421 | 5.098233 | 3.163563 | 3.289509035 | high |
| TCGA-D5-6930 | 1.112328767 | 0 | 3.056707 | 6.640228 | 5.397801 | 8.002551 | 7.905653  | 6.293257 | 3.86786  | 2.821591 | 2.561097 | 1.363472071 | high |
| TCGA-AA-3660 | 6.506849315 | 0 | 5.896854 | 6.314159 | 5.439706 | 8.316554 | 7.700088  | 6.759729 | 3.703573 | 3.937633 | 3.203386 | 1.12320955  | high |
| TCGA-AA-3672 | 0           | 0 | 7.886804 | 5.600581 | 4.918691 | 7.549276 | 9.02756   | 4.706855 | 3.090701 | 3.319983 | 3.140835 | 1.432611783 | high |
| TCGA-AA-A03F | 0           | 0 | 5.701554 | 5.997467 | 5.502975 | 8.123191 | 5.480664  | 5.056765 | 3.831976 | 3.831314 | 2.585627 | 1.560850822 | high |
| TCGA-AA-3851 | 2.756164384 | 0 | 5.983782 | 7.314318 | 5.707243 | 8.411691 | 8.620767  | 5.500742 | 4.157465 | 5.100963 | 2.544559 | 1.317721426 | high |
| TCGA-AZ-4308 | 9.106849315 | 0 | 6.665275 | 5.785469 | 5.672094 | 8.624025 | 7.634531  | 6.517856 | 3.055778 | 4.313776 | 3.32289  | 1.36408503  | high |
| TCGA-AA-A02F | 3.331506849 | 0 | 2.626633 | 5.833048 | 5.333751 | 8.712295 | 4.230264  | 7.600943 | 3.465494 | 2.774918 | 3.430416 | 1.02311313  | high |
| TCGA-G4-6311 | 3.284931507 | 0 | 4.119182 | 6.567655 | 5.398455 | 8.187378 | 6.206941  | 6.075237 | 3.767805 | 4.722895 | 2.96467  | 1.916323624 | high |
| TCGA-A6-2682 | 1.161643836 | 1 | 4.952859 | 6.452774 | 5.487233 | 8.348371 | 6.420245  | 6.869466 | 4.115069 | 5.517748 | 2.53383  | 3.798616169 | high |
| TCGA-NH-A6GA | 0.82739726  | 1 | 6.018363 | 6.386672 | 4.464272 | 7.435819 | 7.269615  | 5.869519 | 4.160716 | 3.999931 | 2.330247 | 3.555475573 | high |
| TCGA-AY-A69D | 1.487671233 | 0 | 2.987927 | 6.126907 | 5.408303 | 8.338705 | 4.595827  | 5.135357 | 4.066947 | 3.555326 | 3.154737 | 1.049229958 | high |
| TCGA-AA-3975 | 2.838356164 | 0 | 5.189819 | 6.407737 | 5.143863 | 8.080668 | 5.278089  | 5.54449  | 3.715414 | 5.149678 | 3.486419 | 1.503741484 | high |
| TCGA-A6-A5ZU | 0.802739726 | 0 | 4.094779 | 6.943898 | 4.768969 | 7.964914 | 6.307642  | 5.608987 | 3.447634 | 3.978326 | 3.496824 | 0.972935894 | high |
| TCGA-WS-AB45 | 5.835616438 | 0 | 3.360777 | 6.164626 | 5.484394 | 7.647195 | 6.542816  | 7.692237 | 3.117913 | 2.73853  | 2.605163 | 2.094572896 | high |
| TCGA-CM-5862 | 0.419178082 | 1 | 4.091578 | 6.510704 | 5.780317 | 8.238292 | 5.01515   | 5.439216 | 3.484059 | 5.296348 | 2.74599  | 2.338886784 | high |
| TCGA-D5-6932 | 0.947945205 | 0 | 2.24829  | 6.126961 | 5.516308 | 8.417605 | 8.62045   | 6.112282 | 3.549849 | 3.189834 | 3.438799 | 1.105811114 | high |
| TCGA-F4-6569 | 2.978082192 | 0 | 3.594534 | 6.328532 | 5.38124  | 8.078117 | 7.132699  | 6.601549 | 3.398881 | 2.525242 | 2.565113 | 1.413545388 | high |
| TCGA-A6-2679 | 3.742465753 | 0 | 6.141651 | 5.610558 | 6.263116 | 9.172552 | 7.904465  | 5.836758 | 3.270255 | 4.822585 | 2.73059  | 2.051910392 | high |
| TCGA-A6-5657 | 2.635616438 | 0 | 3.333899 | 6.519863 | 5.052867 | 8.287354 | 7.603699  | 7.223567 | 3.884299 | 3.312473 | 2.641445 | 2.074647433 | high |
| TCGA-CM-6169 | 1.084931507 | 0 | 4.71281  | 6.504572 | 4.847741 | 8.02782  | 8.160989  | 6.610071 | 4.18449  | 3.102637 | 3.222706 | 1.018893111 | high |
| TCGA-AA-3980 | 0.663013699 | 0 | 4.619617 | 6.54325  | 5.931798 | 8.688995 | 5.379637  | 4.625695 | 4.17926  | 4.332423 | 2.349862 | 1.289169087 | high |
| TCGA-DM-A28H | 9.756164384 | 0 | 5.587654 | 6.083018 | 5.934063 | 7.618442 | 4.062705  | 4.976993 | 4.267151 | 4.34807  | 2.834432 | 1.195633065 | high |
| TCGA-G4-6302 | 0           | 0 | 4.223967 | 5.960011 | 4.988342 | 7.93935  | 8.247216  | 9.002833 | 3.319809 | 2.93798  | 2.256998 | 4.724964008 | high |
| TCGA-F4-6703 | 3.989041096 | 0 | 2.675101 | 5.961776 | 4.801063 | 7.88918  | 8.552989  | 6.751726 | 2.709979 | 3.021992 | 2.490057 | 4.661671523 | high |
| TCGA-AA-A004 | 1.161643836 | 0 | 8.309287 | 5.401545 | 4.914754 | 9.036264 | 7.601362  | 6.113662 | 3.736086 | 5.08025  | 2.790588 | 3.539531951 | high |
| TCGA-AA-A01P | 3.17260274  | 1 | 5.510343 | 5.583477 | 5.348457 | 8.223379 | 9.523786  | 6.780377 | 3.524817 | 3.394583 | 2.909727 | 2.214852308 | high |
| TCGA-D5-6537 | 0.4         | 1 | 2.59684  | 6.588441 | 4.189897 | 8.633928 | 7.645446  | 4.408275 | 4.051463 | 2.844236 | 2.650416 | 1.684785552 | high |
| TCGA-A6-A566 | 2.076712329 | 1 | 5.775427 | 6.205304 | 5.46297  | 8.331004 | 8.300321  | 7.348803 | 4.017864 | 3.332148 | 2.440135 | 1.800539106 | high |
| TCGA-AA-A02K | 1.167123288 | 1 | 5.42689  | 6.152688 | 5.179442 | 8.669616 | 9.416874  | 5.049786 | 4.546182 | 3.716483 | 3.074968 | 1.073756792 | high |
| TCGA-CM-4751 | 2.252054795 | 0 | 4.112541 | 6.662036 | 5.576594 | 8.785793 | 9.094139  | 7.090773 | 4.14909  | 3.550986 | 2.193774 | 1.992494424 | high |
| TCGA-F4-6704 | 0.128767123 | 0 | 5.881889 | 6.536912 | 4.805841 | 8.156578 | 7.845106  | 7.792164 | 3.940079 | 3.06544  | 2.691024 | 1.549202139 | high |
