# Supplementary material for: Single-Cell RNA Sequencing Reveals the Role of Epithelial Cell Marker Genes in Predicting the Prognosis of Colorectal Cancer Patients
Source: Hindawi journal article supplement (doi:10.1155/2022/8347125), 2022-08-01
Supplement: f2 [file 8347125.f2.zip]

**TableS5** MECRGs signature in GEO testing set

| id        | survival time | state | LGALS2   | GDE1     | MPC1     | NGS5     | BST2     | TPM2     | PRELID2  | CAPS     | CACNA1D  | riskScore   | risk |
|-----------|---------------|-------|----------|----------|----------|----------|----------|----------|----------|----------|----------|-------------|------|
| GSM437095 | 4.704522425   | 0     | 4.45486  | 6.876871 | 4.805726 | 7.929478 | 4.269167 | 4.599491 | 4.699502 | 3.866809 | 4.074829 | 0.353905036 | low  |
| GSM437096 | 5.128767123   | 0     | 4.008833 | 6.500478 | 5.882049 | 8.777589 | 5.901271 | 6.037256 | 4.166055 | 4.120559 | 3.428792 | 0.653419191 | low  |
| GSM437097 | 4.064102082   | 0     | 6.786328 | 6.714067 | 5.280452 | 8.101568 | 7.421539 | 4.669563 | 4.269687 | 3.250427 | 2.825468 | 0.593640607 | low  |
| GSM437100 | 4.788290485   | 0     | 5.860948 | 5.788474 | 5.058547 | 7.943113 | 6.709874 | 5.518356 | 3.601096 | 3.739505 | 4.06251  | 0.733996803 | low  |
| GSM437101 | 4.282979921   | 0     | 5.197281 | 6.519879 | 5.237958 | 8.737384 | 7.319907 | 4.866792 | 4.520249 | 4.739782 | 3.442556 | 0.894105959 | low  |
| GSM437103 | 5.639482079   | 0     | 3.688265 | 6.56203  | 5.106876 | 8.752104 | 6.638157 | 5.569045 | 4.46188  | 3.517092 | 3.570676 | 0.600277794 | low  |
| GSM437107 | 0.297241509   | 1     | 4.99287  | 6.511826 | 5.710559 | 8.434342 | 6.085623 | 6.049061 | 3.838767 | 4.470126 | 3.515653 | 0.780752545 | low  |
| GSM437108 | 2.534659411   | 1     | 5.9919   | 6.433047 | 5.605605 | 8.147327 | 6.82274  | 5.996143 | 4.864475 | 4.179732 | 3.016988 | 0.920196911 | low  |
| GSM437112 | 2.380273973   | 1     | 2.664496 | 6.201459 | 5.614906 | 8.342679 | 6.399147 | 4.69045  | 4.237963 | 3.282535 | 3.569516 | 0.593322137 | low  |
| GSM437117 | 0.961643836   | 1     | 3.40413  | 6.608393 | 5.597043 | 8.415961 | 5.98494  | 6.318916 | 3.484265 | 3.784251 | 3.576526 | 0.72144333  | low  |
| GSM437120 | 4.315068493   | 1     | 6.238767 | 6.703269 | 5.034562 | 7.770738 | 5.958601 | 6.279043 | 4.033817 | 3.486817 | 3.399606 | 0.635839652 | low  |
| GSM437122 | 2.772328767   | 1     | 4.701357 | 6.801773 | 5.294393 | 8.161962 | 7.001948 | 5.942591 | 4.139573 | 3.53989  | 3.493362 | 0.566675948 | low  |
| GSM437123 | 3.066575342   | 1     | 4.866477 | 6.47645  | 5.495888 | 7.949724 | 6.002935 | 4.939189 | 4.374584 | 2.945645 | 3.743423 | 0.309680694 | low  |
| GSM437125 | 3.066575342   | 1     | 3.734211 | 6.117588 | 5.58072  | 8.023495 | 6.230086 | 5.563584 | 3.699251 | 2.958534 | 3.131199 | 0.877118516 | low  |
| GSM437128 | 1.993972603   | 1     | 4.239266 | 6.694736 | 5.70411  | 8.481076 | 5.421944 | 4.9872   | 4.47174  | 3.003678 | 2.957457 | 0.455345085 | low  |
| GSM437129 | 0.966575342   | 1     | 3.5445   | 6.783705 | 5.826435 | 8.360326 | 8.143171 | 5.290468 | 3.197947 | 3.105712 | 3.55171  | 0.437026298 | low  |
| GSM437131 | 2.26109589    | 1     | 5.196453 | 6.591878 | 5.59127  | 8.584435 | 5.42325  | 5.82005  | 4.855246 | 4.449908 | 3.722715 | 0.489234099 | low  |
| GSM437132 | 3.774246575   | 1     | 3.153849 | 7.035664 | 5.378628 | 8.737384 | 5.356825 | 5.236242 | 4.117478 | 3.69187  | 4.248752 | 0.246718073 | low  |
| GSM437136 | 6.295890411   | 1     | 3.106452 | 6.737748 | 5.012698 | 8.499978 | 5.045067 | 5.727271 | 4.281801 | 4.321204 | 3.805477 | 0.752203631 | low  |
| GSM437146 | 3.182465753   | 1     | 5.779764 | 6.221237 | 5.622429 | 8.552574 | 8.852945 | 4.801685 | 4.464455 | 3.528003 | 2.967485 | 0.766556309 | low  |
| GSM437151 | 0.348493151   | 1     | 3.866885 | 6.74311  | 5.030752 | 8.155145 | 5.503687 | 5.062988 | 5.296538 | 3.315348 | 3.263236 | 0.55303169  | low  |
| GSM437154 | 1.448219178   | 1     | 2.896115 | 6.730249 | 5.455876 | 8.5108   | 5.831112 | 6.499987 | 4.284669 | 3.483848 | 3.155148 | 0.82555257  | low  |
| GSM437164 | 4.744931507   | 1     | 3.040809 | 6.768617 | 5.058946 | 8.584435 | 4.810222 | 5.520655 | 3.568745 | 3.273434 | 3.554205 | 0.574164522 | low  |
| GSM437165 | 1.182739726   | 1     | 2.709443 | 6.489269 | 5.100514 | 8.791487 | 5.048697 | 3.978448 | 3.788136 | 2.4559   | 2.580787 | 0.814455546 | low  |
| GSM437168 | 2.72630137    | 1     | 2.947657 | 7.106    | 5.832704 | 8.832902 | 7.344796 | 4.932994 | 4.400354 | 4.029446 | 3.619821 | 0.390021626 | low  |
| GSM437169 | 4.153150685   | 1     | 3.038722 | 7.297602 | 5.209455 | 8.108986 | 4.454765 | 6.060099 | 3.383802 | 4.413046 | 3.380879 | 0.929069559 | low  |
| GSM437170 | 0.470136986   | 1     | 5.091195 | 7.074291 | 5.423914 | 8.664193 | 5.137537 | 6.27385  | 4.854401 | 5.474314 | 3.508128 | 0.813289178 | low  |
| GSM437177 | 1.631506849   | 1     | 2.85323  | 6.671177 | 4.996853 | 8.184098 | 7.318558 | 5.095062 | 4.442752 | 3.392533 | 4.053437 | 0.459391521 | low  |
| GSM437186 | 0.643122537   | 1     | 3.583836 | 6.223904 | 5.571472 | 7.981672 | 5.983885 | 6.297094 | 4.081    | 3.490414 | 3.352246 | 0.930752026 | low  |
| GSM437191 | 2.95890411    | 1     | 4.727301 | 6.599394 | 5.47164  | 8.889591 | 5.817105 | 6.090648 | 4.00495  | 3.751751 | 3.325526 | 0.627058317 | low  |
| GSM437193 | 1.451079002   | 1     | 3.985177 | 5.821094 | 6.282599 | 8.263527 | 6.464512 | 4.819403 | 4.711867 | 3.371607 | 2.900489 | 0.787562054 | low  |
| GSM437199 | 11.71643836   | 0     | 2.645765 | 6.500478 | 4.961668 | 8.323686 | 6.34044  | 7.171048 | 3.733022 | 3.444711 | 4.109299 | 0.706604356 | low  |
| GSM437205 | 6.914794521   | 0     | 5.750886 | 6.10952  | 5.328853 | 8.803722 | 6.268841 | 6.220657 | 4.864475 | 3.83694  | 3.599349 | 0.601366524 | low  |
| GSM437211 | 4.531232877   | 0     | 6.939284 | 6.156707 | 5.384563 | 8.246462 | 8.232822 | 5.47002  | 4.181667 | 3.254854 | 2.797918 | 0.908724322 | low  |
| GSM437214 | 3.599178082   | 0     | 5.299533 | 6.56415  | 5.304686 | 8.531232 | 5.799496 | 6.11446  | 4.631568 | 3.285935 | 3.511959 | 0.426603053 | low  |
| GSM437216 | 0.299178082   | 0     | 5.960063 | 6.50657  | 5.898375 | 7.594701 | 5.040177 | 4.869057 | 4.627304 | 3.406712 | 4.043272 | 0.202144895 | low  |
| GSM437217 | 3.00739726    | 0     | 5.998151 | 6.482604 | 4.92308  | 7.764954 | 4.970755 | 4.235327 | 4.96182  | 2.66794  | 2.606619 | 0.647217459 | low  |
| GSM437227 | 2.180547945   | 0     | 4.976824 | 8.125047 | 5.106876 | 8.386378 | 6.282274 | 5.239186 | 3.499484 | 4.176259 | 2.614876 | 0.710405941 | low  |
| GSM437229 | 4.596164384   | 0     | 3.883256 | 6.65053  | 5.129065 | 8.791487 | 7.296151 | 4.843405 | 4.315796 | 2.955705 | 2.713007 | 0.822567736 | low  |
| GSM437230 | 5.806849315   | 0     | 3.849967 | 6.619875 | 5.296514 | 7.856574 | 5.307313 | 5.851491 | 3.899524 | 4.09728  | 3.702045 | 0.778241176 | low  |
| GSM437233 | 6.903287671   | 0     | 2.98066  | 6.187285 | 5.061318 | 8.360326 | 5.535836 | 5.492676 | 4.379591 | 3.701459 | 3.720032 | 0.8381205   | low  |
| GSM437237 | 5.198630137   | 0     | 3.936327 | 6.783705 | 5.462769 | 8.305216 | 7.976091 | 5.573182 | 4.424572 | 3.288262 | 2.802094 | 0.862255864 | low  |
| GSM437238 | 2.801917808   | 0     | 3.383673 | 6.49745  | 5.265963 | 8.712513 | 7.749137 | 5.584179 | 4.043925 | 3.423786 | 3.590338 | 0.651510958 | low  |
| GSM437244 | 3.78          | 0     | 3.326612 | 6.945743 | 5.579314 | 9.141261 | 6.174259 | 6.193049 | 4.202519 | 4.344156 | 3.344994 | 0.726310628 | low  |
| GSM437251 | 3.696164384   | 0     | 4.110424 | 6.716576 | 5.273544 | 8.161962 | 6.800549 | 6.38661  | 4.304622 | 3.365334 | 4.037905 | 0.387211741 | low  |
| GSM437253 | 2.191232877   | 0     | 5.707217 | 6.373963 | 5.984363 | 8.386378 | 5.756606 | 5.569675 | 4.204588 | 4.026017 | 3.087523 | 0.680781335 | low  |
| GSM437256 | 1.82630137    | 0     | 3.744349 | 6.676412 | 5.854072 | 9.066312 | 6.082753 | 4.335727 | 3.70682  | 3.565373 | 2.645228 | 0.750373107 | low  |
| GSM437257 | 2.728767123   | 0     | 2.296798 | 6.110274 | 5.602995 | 7.943113 | 7.797682 | 4.896269 | 4.346397 | 2.315417 | 3.673727 | 0.449632321 | low  |
| GSM437258 | 3.261369863   | 0     | 5.852539 | 6.932157 | 5.41551  | 8.406197 | 7.179849 | 4.515717 | 4.255359 | 4.663504 | 3.208001 | 0.725035818 | low  |

|           |             |   |          |          |          |           |          |          |          |          |          |             |     |
|-----------|-------------|---|----------|----------|----------|-----------|----------|----------|----------|----------|----------|-------------|-----|
| GSM437261 | 1.236986301 | 0 | 2.704721 | 6.96959  | 4.806124 | 8.415961  | 6.244509 | 5.459248 | 4.359975 | 3.871093 | 3.461997 | 0.85019074  | low |
| GSM437264 | 8.644109589 | 0 | 2.736657 | 6.110274 | 5.924669 | 8.699975  | 5.175553 | 5.24153  | 4.104318 | 3.903584 | 3.51449  | 0.718548986 | low |
| GSM437266 | 9.23260274  | 0 | 5.526094 | 6.209288 | 4.926639 | 8.605898  | 7.907793 | 4.842214 | 3.58664  | 2.724313 | 3.025302 | 0.793641154 | low |
| GSM437267 | 8.54630137  | 0 | 2.61611  | 6.815642 | 5.55129  | 8.415961  | 6.95284  | 5.533778 | 4.082678 | 3.332009 | 3.038611 | 0.788599999 | low |
| GSM437268 | 8.17890411  | 0 | 3.468847 | 6.170748 | 5.201694 | 8.777589  | 8.758629 | 4.540396 | 4.169748 | 3.224414 | 3.470857 | 0.727499122 | low |
| GSM437269 | 7.911780822 | 0 | 3.062506 | 7.109261 | 5.689834 | 8.279663  | 4.337154 | 4.596734 | 4.410242 | 3.482863 | 5.230454 | 0.073802896 | low |
| GSM437270 | 7.036438356 | 0 | 4.005209 | 6.616198 | 4.886891 | 8.406197  | 6.291096 | 6.747811 | 3.492612 | 3.092713 | 3.358616 | 0.868399533 | low |
| GSM437271 | 6.482465753 | 0 | 4.800305 | 7.576782 | 6.096234 | 8.791487  | 6.558241 | 4.487554 | 4.649741 | 3.116917 | 2.428583 | 0.304358507 | low |
| GSM437273 | 6.525205479 | 0 | 4.744562 | 6.238026 | 5.557976 | 8.434342  | 6.121679 | 6.03227  | 4.621926 | 2.883538 | 3.093179 | 0.59532394  | low |
| GSM437274 | 6.087945205 | 0 | 6.93545  | 7.115748 | 6.683669 | 8.552574  | 4.513711 | 5.950944 | 4.801825 | 3.645144 | 2.890866 | 0.217746396 | low |
| GSM437275 | 5.822465753 | 0 | 8.365491 | 6.892471 | 5.266519 | 8.874588  | 4.147096 | 4.480523 | 4.792165 | 3.077737 | 3.596119 | 0.132286235 | low |
| GSM437277 | 5.582465753 | 0 | 4.410787 | 7.763005 | 5.666644 | 8.57444   | 3.763553 | 5.320471 | 4.870455 | 3.731766 | 3.836684 | 0.140671909 | low |
| GSM437279 | 4.877260274 | 0 | 5.767621 | 7.012775 | 5.516693 | 8.396519  | 5.118764 | 5.737706 | 3.860157 | 2.88599  | 3.022847 | 0.364665109 | low |
| GSM437281 | 4.344657534 | 0 | 5.607065 | 6.891038 | 5.957264 | 8.377914  | 5.597689 | 6.367349 | 4.535972 | 3.560365 | 3.283725 | 0.359579758 | low |
| GSM437282 | 4.598630137 | 0 | 2.875947 | 6.783705 | 6.455172 | 7.922491  | 8.030629 | 4.283763 | 5.192005 | 2.559183 | 2.880105 | 0.323542156 | low |
| GSM437283 | 4.657808219 | 0 | 8.392265 | 7.49007  | 7.197294 | 8.481076  | 4.65303  | 5.862398 | 5.106849 | 3.661124 | 2.934771 | 0.102883149 | low |
| GSM437284 | 4.144931507 | 0 | 2.789373 | 6.67177  | 5.78279  | 7.981672  | 7.69949  | 6.191836 | 3.607528 | 2.552805 | 3.030522 | 0.69377346  | low |
| GSM437285 | 4.036438356 | 0 | 4.741558 | 7.70225  | 5.262388 | 8.818084  | 3.728048 | 5.307277 | 5.13046  | 4.770992 | 3.424464 | 0.362652816 | low |
| GSM437286 | 4.074246575 | 0 | 4.640895 | 6.609574 | 6.292849 | 8.079486  | 4.725329 | 5.005964 | 3.569693 | 2.827403 | 3.158935 | 0.319583846 | low |
| GSM437287 | 4.149863014 | 0 | 3.458422 | 6.333191 | 5.738742 | 8.406197  | 3.931467 | 3.813178 | 3.733022 | 3.595655 | 4.090295 | 0.290157755 | low |
| GSM437288 | 5.182191781 | 0 | 5.358666 | 6.391965 | 6.104206 | 8.434342  | 6.99134  | 5.994281 | 4.006018 | 2.632442 | 3.73821  | 0.226680655 | low |
| GSM437289 | 0.075616438 | 0 | 3.92432  | 6.766055 | 5.398545 | 8.874588  | 6.976472 | 5.048038 | 4.193362 | 4.599554 | 4.277125 | 0.403878461 | low |
| GSM437290 | 2.577534247 | 0 | 3.492887 | 6.639539 | 5.562972 | 8.453363  | 4.485778 | 6.792863 | 4.039662 | 4.023936 | 3.235523 | 0.940935456 | low |
| GSM437291 | 3.312328767 | 0 | 4.085767 | 6.609574 | 6.242698 | 8.079486  | 6.356766 | 5.497541 | 4.80438  | 3.700418 | 3.301686 | 0.455753929 | low |
| GSM437292 | 9.586849315 | 0 | 3.983461 | 6.597215 | 6.624769 | 7.943113  | 4.308832 | 3.726643 | 4.994082 | 2.919087 | 4.6738   | 0.058866295 | low |
| GSM437293 | 2.623561644 | 0 | 6.13162  | 6.724126 | 5.407316 | 8.140315  | 5.752292 | 6.213133 | 3.947824 | 2.813469 | 2.912697 | 0.529266459 | low |
| GSM437294 | 1.642191781 | 0 | 4.032608 | 6.818102 | 5.993205 | 8.57444   | 8.984062 | 5.225358 | 4.078955 | 2.506793 | 2.632134 | 0.512280748 | low |
| GSM437295 | 2.023561644 | 0 | 3.957286 | 6.750776 | 5.804246 | 9.240194  | 6.201833 | 6.377944 | 4.170633 | 2.987236 | 3.898295 | 0.220350283 | low |
| GSM437296 | 10.74657534 | 0 | 4.270834 | 7.210759 | 5.915678 | 9.101667  | 4.394818 | 6.07343  | 4.462913 | 4.292245 | 2.529745 | 0.764964739 | low |
| GSM437297 | 7.813972603 | 0 | 3.939308 | 6.724126 | 6.626326 | 8.752104  | 8.388256 | 4.232098 | 3.660973 | 2.340797 | 3.020963 | 0.234882181 | low |
| GSM437298 | 4.993150685 | 0 | 3.405224 | 6.436209 | 5.645179 | 8.605898  | 4.906428 | 4.597814 | 4.813079 | 3.223051 | 3.476541 | 0.376414555 | low |
| GSM437299 | 2.617808219 | 0 | 4.644161 | 6.801773 | 6.079511 | 8.351597  | 6.486255 | 4.021468 | 4.305905 | 3.057927 | 2.787149 | 0.392779508 | low |
| GSM437300 | 3.474246575 | 0 | 5.828971 | 7.2687   | 5.943646 | 8.542934  | 6.650009 | 5.059013 | 3.970309 | 3.09755  | 3.488309 | 0.178620908 | low |
| GSM437301 | 2.685205479 | 0 | 3.873898 | 6.576346 | 5.068572 | 7.794967  | 8.316524 | 5.826597 | 3.515209 | 2.77401  | 3.150815 | 0.948354712 | low |
| GSM437302 | 1.836986301 | 0 | 4.776166 | 6.791358 | 5.777993 | 8.651554  | 5.211445 | 5.257329 | 4.067694 | 3.245049 | 4.098298 | 0.175462809 | low |
| GSM437303 | 5.253068118 | 0 | 2.777604 | 7.178748 | 6.049719 | 8.471333  | 6.160795 | 4.289802 | 4.095982 | 2.626728 | 2.620389 | 0.391331376 | low |
| GSM437304 | 4.934209044 | 0 | 7.627709 | 7.590835 | 6.443664 | 8.640396  | 5.59259  | 6.507682 | 4.457625 | 3.118705 | 2.89174  | 0.15349618  | low |
| GSM437305 | 4.934209044 | 0 | 3.984542 | 6.975692 | 4.475429 | 8.065029  | 5.581237 | 4.899094 | 3.948119 | 3.286937 | 3.368294 | 0.704269289 | low |
| GSM437306 | 4.977444173 | 0 | 5.652586 | 6.836901 | 5.893703 | 8.499978  | 6.796437 | 6.236678 | 3.736572 | 2.70255  | 2.51961  | 0.558750619 | low |
| GSM437308 | 4.591030211 | 0 | 3.217567 | 6.966485 | 5.859674 | 8.542934  | 7.945973 | 4.894453 | 3.890055 | 2.807538 | 3.336039 | 0.336325887 | low |
| GSM437309 | 5.331431789 | 0 | 6.791828 | 6.865279 | 5.679272 | 8.453363  | 6.654902 | 5.398484 | 4.334836 | 2.928361 | 2.78914  | 0.378938701 | low |
| GSM437310 | 4.499155564 | 0 | 3.417262 | 5.516053 | 5.228975 | 8.664193  | 3.748744 | 5.424186 | 4.880372 | 3.396232 | 4.245882 | 0.469925352 | low |
| GSM437311 | 4.912591479 | 0 | 4.182835 | 5.38687  | 5.760621 | 8.207024  | 6.924447 | 5.867327 | 3.694923 | 3.516779 | 3.742927 | 0.963316891 | low |
| GSM437312 | 4.480240195 | 0 | 4.967311 | 7.106    | 5.22967  | 8.520747  | 3.857092 | 4.248769 | 4.727643 | 3.032838 | 2.749662 | 0.388303706 | low |
| GSM437316 | 6.106961907 | 0 | 4.365514 | 6.720343 | 6.803385 | 10.167164 | 2.729161 | 5.431649 | 4.718443 | 1.870303 | 3.235288 | 0.072060452 | low |
| GSM437317 | 3.81820229  | 0 | 4.147808 | 6.74026  | 5.581418 | 8.396519  | 7.978279 | 5.706782 | 3.722188 | 2.483465 | 2.540859 | 0.766308072 | low |
| GSM437319 | 5.685419403 | 0 | 5.799796 | 6.879817 | 5.978073 | 8.552574  | 7.255316 | 5.348541 | 3.7622   | 3.164801 | 2.703714 | 0.494794259 | low |
| GSM437320 | 3.861437419 | 0 | 6.118649 | 6.623454 | 6.197951 | 8.424816  | 6.23519  | 4.861771 | 4.656299 | 2.671378 | 2.75895  | 0.292643893 | low |
| GSM437321 | 3.342615877 | 0 | 4.853823 | 6.543502 | 5.739802 | 8.491169  | 5.693692 | 3.635189 | 4.056423 | 2.789922 | 2.904617 | 0.387626527 | low |
| GSM437322 | 3.348020266 | 0 | 4.148222 | 6.902277 | 6.003711 | 8.161962  | 6.097816 | 4.298888 | 4.613072 | 3.326851 | 2.616939 | 0.540603468 | low |
| GSM437323 | 5.79080503  | 0 | 4.873634 | 6.57169  | 6.061232 | 8.765399  | 5.03416  | 4.830023 | 4.703782 | 3.925119 | 3.525038 | 0.31899438  | low |

|           |             |   |          |          |          |          |           |          |          |          |          |             |      |
|-----------|-------------|---|----------|----------|----------|----------|-----------|----------|----------|----------|----------|-------------|------|
| GSM437324 | 3.404766373 | 0 | 3.723078 | 6.903756 | 6.323459 | 8.542934 | 5.055296  | 4.643721 | 4.313602 | 3.110214 | 2.960942 | 0.315588094 | low  |
| GSM437093 | 4.442409458 | 0 | 3.782633 | 6.669422 | 5.247045 | 9.018432 | 7.457681  | 5.212128 | 3.866421 | 4.328645 | 2.813837 | 1.51613166  | low  |
| GSM437094 | 4.763970726 | 0 | 3.70752  | 6.461631 | 4.797271 | 8.640396 | 5.42985   | 5.80617  | 4.42764  | 3.766997 | 3.14858  | 1.1840693   | low  |
| GSM437098 | 5.274685682 | 0 | 4.493259 | 6.572811 | 5.383529 | 7.949724 | 6.351093  | 5.344456 | 4.053091 | 3.429189 | 2.715392 | 1.104092632 | low  |
| GSM437099 | 4.126252581 | 0 | 3.277619 | 6.512855 | 5.577597 | 8.079486 | 6.053     | 4.242876 | 4.691319 | 3.636902 | 2.716535 | 1.013399465 | low  |
| GSM437102 | 9.163145055 | 0 | 3.522128 | 6.047127 | 4.813775 | 7.838462 | 6.555054  | 6.570434 | 3.342309 | 3.152574 | 2.625933 | 2.959473584 | low  |
| GSM437104 | 4.377556764 | 0 | 2.852168 | 6.324856 | 6.214969 | 7.862322 | 9.156118  | 4.773472 | 3.910236 | 3.941611 | 3.037338 | 1.179909598 | low  |
| GSM437105 | 4.453218241 | 0 | 5.565316 | 6.123161 | 6.172138 | 7.819155 | 8.261018  | 5.591853 | 3.856006 | 3.843891 | 2.518395 | 1.493810723 | low  |
| GSM437106 | 3.966823044 | 1 | 7.158567 | 6.070185 | 5.129756 | 8.140315 | 8.174833  | 6.487417 | 4.268181 | 3.946288 | 2.339338 | 2.484488166 | low  |
| GSM437109 | 3.36963783  | 1 | 5.755645 | 5.906066 | 4.507527 | 7.740072 | 8.735653  | 6.017121 | 4.085271 | 3.846622 | 2.364616 | 4.587739207 | low  |
| GSM437110 | 0.670144492 | 1 | 3.91392  | 6.604951 | 5.474079 | 8.499978 | 8.208193  | 5.888562 | 4.094094 | 3.642159 | 2.613069 | 1.429748109 | low  |
| GSM437111 | 0.42964909  | 1 | 8.019364 | 6.30433  | 4.376645 | 8.552574 | 8.391102  | 5.059601 | 3.882567 | 3.909929 | 2.823516 | 1.502802969 | low  |
| GSM437113 | 5.655616438 | 1 | 4.03607  | 6.669422 | 4.39471  | 8.57444  | 5.192998  | 4.713493 | 4.249252 | 4.134176 | 3.36265  | 1.089070074 | low  |
| GSM437114 | 5.414794521 | 1 | 3.290135 | 6.707977 | 4.882632 | 8.453363 | 5.3823    | 5.049182 | 4.752826 | 3.241697 | 2.693906 | 1.044667364 | low  |
| GSM437115 | 1.35369863  | 1 | 3.664537 | 6.614045 | 5.009281 | 8.803722 | 5.285309  | 5.590664 | 4.707375 | 5.22435  | 3.225161 | 1.657672408 | low  |
| GSM437116 | 11.08438356 | 1 | 4.05583  | 6.397632 | 4.476498 | 8.491169 | 7.989813  | 5.299058 | 3.889769 | 2.772097 | 3.219764 | 0.974692097 | low  |
| GSM437118 | 2.36630137  | 1 | 2.314011 | 5.99926  | 5.406232 | 8.5108   | 10.052501 | 5.212128 | 3.309127 | 3.363993 | 2.157322 | 3.933665961 | high |
| GSM437119 | 2.204383562 | 1 | 4.341442 | 6.291564 | 4.7257   | 7.770738 | 5.387743  | 7.254711 | 3.521811 | 3.945283 | 2.797918 | 3.053484886 | high |
| GSM437121 | 1.975068493 | 1 | 2.965847 | 6.260189 | 4.796532 | 8.396519 | 8.408726  | 5.378422 | 4.076657 | 3.527343 | 2.982546 | 1.88933314  | high |
| GSM437124 | 2.552876712 | 1 | 3.389647 | 5.946238 | 5.255066 | 7.161943 | 6.541923  | 6.146629 | 4.764505 | 3.685934 | 3.104134 | 1.916749653 | high |
| GSM437126 | 1.809863014 | 1 | 3.650975 | 5.885663 | 5.753176 | 8.214794 | 9.257297  | 4.908003 | 4.26873  | 3.046087 | 2.091994 | 2.230476833 | high |
| GSM437127 | 2.231506849 | 1 | 4.996006 | 5.997732 | 5.058946 | 7.988906 | 6.382433  | 5.474033 | 4.106978 | 3.32252  | 2.457556 | 2.02937281  | high |
| GSM437130 | 5.790410959 | 1 | 2.400396 | 6.557663 | 4.792279 | 8.314888 | 8.550061  | 5.934485 | 3.935273 | 3.167154 | 2.406647 | 2.617817457 | high |
| GSM437133 | 4.441643836 | 1 | 2.902607 | 6.098017 | 5.24421  | 8.132842 | 10.071748 | 6.091883 | 3.146438 | 3.858184 | 2.371343 | 4.901513097 | high |
| GSM437134 | 0.502191781 | 1 | 4.036529 | 5.866362 | 5.469215 | 8.101568 | 5.886106  | 5.794641 | 4.276135 | 4.000871 | 2.855162 | 1.960499468 | high |
| GSM437135 | 1.68        | 1 | 2.704997 | 6.070978 | 4.841152 | 8.108986 | 7.409292  | 6.74425  | 3.395511 | 3.503682 | 2.80132  | 3.312420499 | high |
| GSM437137 | 0.823561644 | 1 | 3.380558 | 6.091083 | 4.707344 | 8.542934 | 8.367434  | 5.999404 | 3.78108  | 3.674247 | 3.648857 | 1.399241605 | high |
| GSM437138 | 3.406849315 | 1 | 3.162841 | 6.044006 | 5.751705 | 8.214794 | 6.382857  | 6.161433 | 3.865662 | 4.089993 | 3.129703 | 1.611102448 | high |
| GSM437139 | 1.828767123 | 1 | 3.235079 | 6.683322 | 4.931813 | 8.434342 | 8.484045  | 5.902084 | 3.217527 | 4.452338 | 3.292482 | 1.956907055 | high |
| GSM437140 | 4.855068493 | 1 | 3.415979 | 6.107162 | 5.520011 | 8.462447 | 5.026478  | 5.132157 | 4.024215 | 4.59698  | 3.550084 | 1.134960993 | high |
| GSM437141 | 3.928767123 | 1 | 3.819215 | 6.773758 | 5.148438 | 8.444041 | 8.399759  | 6.017445 | 4.693305 | 3.778626 | 2.818615 | 1.299844358 | high |
| GSM437142 | 0.466849315 | 1 | 2.647191 | 6.144359 | 4.484225 | 8.664193 | 7.711389  | 6.872433 | 3.210812 | 3.93446  | 2.347782 | 6.542770012 | high |
| GSM437143 | 4.172054795 | 1 | 7.365993 | 6.222143 | 5.608088 | 8.198961 | 9.182996  | 4.649561 | 4.019764 | 3.413404 | 2.469679 | 1.032844474 | high |
| GSM437144 | 5.574246575 | 1 | 3.695157 | 6.796411 | 5.440157 | 8.542934 | 6.114633  | 6.845141 | 3.770899 | 4.410578 | 3.011169 | 1.459120474 | high |
| GSM437145 | 2.842191781 | 1 | 4.268886 | 6.351415 | 5.5555   | 8.491169 | 8.788428  | 6.112608 | 3.79415  | 3.819504 | 2.603953 | 1.877924905 | high |
| GSM437147 | 4.512328767 | 1 | 3.766312 | 6.061632 | 5.643779 | 8.191262 | 8.221293  | 5.58586  | 3.951359 | 6.112599 | 3.007048 | 4.682317068 | high |
| GSM437148 | 1.564109589 | 1 | 3.18683  | 6.172386 | 5.962061 | 8.125491 | 8.304614  | 5.289292 | 4.463339 | 3.821141 | 2.562855 | 1.734287017 | high |
| GSM437149 | 2.158356164 | 1 | 6.847254 | 6.219575 | 5.228638 | 8.03086  | 8.031798  | 6.05045  | 4.396636 | 3.101335 | 2.633863 | 1.095291735 | high |
| GSM437150 | 2.634246575 | 1 | 2.700498 | 6.388067 | 5.488698 | 8.254869 | 4.605211  | 5.173943 | 3.197114 | 3.809927 | 2.828255 | 1.573808017 | high |
| GSM437152 | 4.047123288 | 1 | 4.787564 | 6.553402 | 4.834755 | 8.002707 | 7.282583  | 6.404055 | 3.580402 | 3.69552  | 2.61278  | 2.259823542 | high |
| GSM437153 | 1.523835616 | 1 | 4.133404 | 5.912395 | 4.388701 | 8.184098 | 4.71284   | 5.728911 | 3.574951 | 3.960036 | 3.013608 | 2.830454583 | high |
| GSM437155 | 0.437260274 | 1 | 3.366731 | 6.730249 | 5.511507 | 8.594947 | 7.178601  | 6.402699 | 4.135287 | 3.158217 | 2.373339 | 1.329980367 | high |
| GSM437156 | 0.193972603 | 1 | 3.8934   | 5.977304 | 5.640719 | 8.05829  | 9.029342  | 6.148544 | 4.234014 | 3.302412 | 2.408325 | 2.255564004 | high |
| GSM437157 | 0.470136986 | 1 | 3.585303 | 5.672357 | 5.504204 | 8.147327 | 7.191553  | 5.539637 | 3.273365 | 3.432569 | 2.518698 | 2.826735032 | high |
| GSM437158 | 1.255890411 | 1 | 2.96868  | 6.332182 | 4.697488 | 8.155145 | 6.077647  | 5.196508 | 3.604957 | 4.760065 | 3.393612 | 2.385217318 | high |
| GSM437159 | 0.407671233 | 1 | 3.990261 | 6.884126 | 5.381796 | 8.305216 | 6.238712  | 5.563584 | 3.897339 | 4.446673 | 3.032898 | 1.199648312 | high |
| GSM437160 | 2.374520548 | 1 | 3.046857 | 5.939718 | 5.052278 | 7.419746 | 8.818478  | 4.20422  | 3.587333 | 3.472731 | 2.600457 | 3.130108567 | high |
| GSM437161 | 0.267123288 | 1 | 4.59407  | 5.873252 | 5.13217  | 8.263527 | 8.219786  | 5.779937 | 3.830727 | 4.699542 | 3.138906 | 2.806162961 | high |
| GSM437162 | 0.075616438 | 1 | 5.029112 | 6.447428 | 5.107884 | 8.222796 | 7.462273  | 5.93513  | 4.072413 | 3.825392 | 3.178249 | 1.130407579 | high |
| GSM437163 | 1.542739726 | 1 | 5.626347 | 6.463465 | 5.314929 | 8.640396 | 6.633855  | 6.593614 | 3.80139  | 3.646415 | 2.792379 | 1.17747684  | high |
| GSM437166 | 0.420821918 | 1 | 4.623746 | 6.301603 | 4.860943 | 8.542934 | 5.764495  | 4.944293 | 4.615372 | 2.867876 | 2.477593 | 1.141626806 | high |

|           |             |   |          |          |          |          |          |          |          |          |          |             |      |
|-----------|-------------|---|----------|----------|----------|----------|----------|----------|----------|----------|----------|-------------|------|
| GSM437167 | 0.410136986 | 1 | 7.619587 | 5.91903  | 4.942668 | 8.207024 | 8.60288  | 4.997547 | 4.200405 | 2.901485 | 2.73827  | 1.018799321 | high |
| GSM437171 | 0.659178082 | 1 | 4.156541 | 6.47645  | 5.152556 | 8.453363 | 9.046333 | 6.155645 | 3.710239 | 3.401652 | 2.848057 | 1.496075547 | high |
| GSM437172 | 2.796164384 | 1 | 2.898204 | 6.672983 | 5.421491 | 8.351597 | 6.354473 | 5.675306 | 3.89625  | 3.371607 | 2.892005 | 1.047627415 | high |
| GSM437173 | 0.118356164 | 1 | 3.05774  | 7.032645 | 5.503525 | 8.238509 | 6.295608 | 6.792238 | 3.38843  | 4.578903 | 2.706849 | 2.129924685 | high |
| GSM437174 | 3.036986301 | 1 | 2.612371 | 7.106    | 5.232824 | 8.675906 | 9.156118 | 5.948555 | 4.515904 | 2.829691 | 2.439723 | 1.055914094 | high |
| GSM437175 | 3.077260274 | 1 | 3.614423 | 6.314335 | 4.713449 | 8.369369 | 7.40495  | 6.337374 | 3.220709 | 4.099618 | 3.134992 | 2.513570894 | high |
| GSM437176 | 1.896164384 | 1 | 3.759559 | 5.966072 | 4.625353 | 7.710733 | 6.194961 | 5.866107 | 4.29401  | 3.475173 | 3.567241 | 1.376093841 | high |
| GSM437178 | 0.707671233 | 1 | 4.014453 | 6.008809 | 5.542465 | 7.936409 | 8.477641 | 6.556464 | 3.779311 | 2.995564 | 2.362954 | 2.310741113 | high |
| GSM437179 | 1.253424658 | 1 | 2.080302 | 6.142852 | 4.784396 | 7.974867 | 5.567179 | 5.318188 | 3.718863 | 5.064591 | 3.472433 | 3.156440134 | high |
| GSM437180 | 1.196712329 | 1 | 3.121067 | 6.010237 | 4.772101 | 8.132842 | 5.188063 | 6.230882 | 4.17994  | 3.259302 | 3.334375 | 1.376835875 | high |
| GSM437181 | 0.818630137 | 1 | 5.964478 | 6.381455 | 5.221171 | 8.333047 | 6.961531 | 6.52558  | 3.661692 | 3.79963  | 2.72744  | 1.550764262 | high |
| GSM437182 | 0.734794521 | 1 | 2.380425 | 6.767375 | 4.877733 | 8.093756 | 6.321315 | 5.618437 | 4.601823 | 3.712442 | 2.836969 | 1.596343908 | high |
| GSM437183 | 0.170136986 | 1 | 2.757441 | 6.719139 | 5.1415   | 8.481076 | 5.487905 | 5.123245 | 3.87811  | 4.336008 | 3.409558 | 1.070045938 | high |
| GSM437184 | 1.872328767 | 1 | 3.528775 | 6.097233 | 5.298225 | 8.360326 | 8.855043 | 5.04633  | 4.278985 | 2.735379 | 2.508407 | 1.460475065 | high |
| GSM437185 | 3.804691312 | 1 | 3.995103 | 7.014366 | 4.692104 | 8.207024 | 5.51257  | 5.087554 | 3.962432 | 4.421625 | 3.250882 | 1.169133845 | high |
| GSM437187 | 1.92396322  | 1 | 6.211111 | 6.397632 | 5.206628 | 8.699975 | 5.743077 | 5.496939 | 3.820221 | 4.686214 | 2.516026 | 2.030904735 | high |
| GSM437188 | 1.778044661 | 1 | 3.241247 | 6.294333 | 4.909773 | 8.406197 | 6.660623 | 6.011549 | 3.961862 | 5.608801 | 2.870286 | 5.098391937 | high |
| GSM437189 | 2.721110903 | 1 | 4.454973 | 6.127872 | 4.749923 | 8.552574 | 6.704406 | 5.900891 | 3.675308 | 5.479412 | 3.380879 | 3.185391618 | high |
| GSM437190 | 1.13762432  | 1 | 2.936068 | 6.3533   | 5.171318 | 8.169015 | 5.962635 | 6.030864 | 3.739658 | 3.224055 | 2.821252 | 1.545116831 | high |
| GSM437192 | 0.12700319  | 1 | 4.267071 | 6.57169  | 4.935996 | 8.453363 | 5.664225 | 6.160768 | 3.256051 | 4.861771 | 3.483193 | 1.649642338 | high |
| GSM437194 | 1.040345281 | 1 | 5.157043 | 6.744336 | 4.863077 | 8.499978 | 6.120457 | 6.355848 | 3.99233  | 4.915102 | 3.112042 | 1.762511504 | high |
| GSM437195 | 0.567461062 | 1 | 3.529179 | 6.473458 | 5.560856 | 7.819155 | 5.981755 | 5.913236 | 4.053371 | 4.251368 | 2.905696 | 1.685879213 | high |
| GSM437196 | 2.672471383 | 1 | 3.28876  | 5.810198 | 5.078751 | 8.386378 | 6.721985 | 5.951563 | 4.219774 | 3.360279 | 2.093102 | 3.853871513 | high |
| GSM437197 | 1.326778007 | 1 | 3.325288 | 6.588492 | 5.527198 | 7.943113 | 6.112449 | 6.521069 | 3.809847 | 3.75769  | 2.706525 | 1.68967763  | high |
| GSM437198 | 0.035128542 | 1 | 4.055612 | 7.355001 | 4.706275 | 7.764954 | 7.303689 | 6.971128 | 3.816766 | 3.770255 | 3.123495 | 1.199763813 | high |
| GSM437200 | 10.08657534 | 0 | 3.700425 | 6.444297 | 5.406544 | 8.396519 | 6.310822 | 6.682185 | 3.642305 | 3.166104 | 2.714212 | 1.341264873 | high |
| GSM437201 | 9.798082192 | 0 | 2.600696 | 6.461631 | 4.953521 | 7.782855 | 8.511687 | 7.33941  | 3.711898 | 4.949593 | 2.489914 | 7.659131726 | high |
| GSM437202 | 4.892876712 | 0 | 4.7624   | 6.499442 | 5.196564 | 7.895712 | 9.346509 | 5.925791 | 3.930128 | 5.889064 | 2.714212 | 5.321650141 | high |
| GSM437203 | 6.763561644 | 0 | 5.889549 | 6.397632 | 5.189285 | 7.75863  | 8.546883 | 5.721156 | 3.939761 | 3.773699 | 2.093429 | 2.805183485 | high |
| GSM437204 | 9.108493151 | 0 | 3.070801 | 6.319045 | 5.348999 | 7.198584 | 6.571948 | 10.49466 | 2.970506 | 3.284482 | 3.057972 | 3.055667962 | high |
| GSM437206 | 7.376712329 | 0 | 2.556415 | 6.215151 | 4.907601 | 8.520747 | 5.755039 | 5.759347 | 4.340554 | 3.844599 | 3.680024 | 1.065986741 | high |
| GSM437207 | 6.252328767 | 0 | 3.017527 | 6.724126 | 5.612757 | 8.594947 | 8.744981 | 6.246297 | 3.387336 | 3.954062 | 3.248747 | 1.139441919 | high |
| GSM437208 | 5.574246575 | 0 | 4.029186 | 6.292546 | 5.082266 | 8.169015 | 8.65854  | 6.478186 | 3.823765 | 3.970321 | 3.383259 | 1.57406456  | high |
| GSM437209 | 4.29369863  | 0 | 3.338878 | 5.755102 | 4.939757 | 8.023495 | 9.365842 | 6.233389 | 3.33998  | 3.396969 | 2.304127 | 5.42466832  | high |
| GSM437210 | 5.268493151 | 0 | 6.943789 | 5.899987 | 5.054027 | 8.101568 | 8.157933 | 6.57646  | 3.874792 | 3.600354 | 3.126159 | 1.398873642 | high |
| GSM437212 | 4.749863014 | 0 | 3.629063 | 5.719045 | 5.285987 | 7.962567 | 9.740196 | 5.76495  | 3.622494 | 3.256929 | 2.419418 | 3.535709991 | high |
| GSM437213 | 4.117808219 | 0 | 3.361972 | 5.713418 | 4.881551 | 7.429735 | 9.041584 | 5.004327 | 4.655949 | 3.706156 | 2.599866 | 3.937918314 | high |
| GSM437215 | 2.487945205 | 0 | 4.722985 | 6.199789 | 5.534877 | 8.169015 | 6.056552 | 5.657428 | 4.111645 | 3.980138 | 2.69702  | 1.603533729 | high |
| GSM437218 | 1.645479452 | 0 | 5.010536 | 6.204946 | 5.72772  | 8.238509 | 8.095696 | 5.895846 | 4.291204 | 4.640567 | 3.274004 | 1.31287468  | high |
| GSM437219 | 9.74630137  | 0 | 4.609245 | 6.733801 | 4.871464 | 8.044305 | 4.897066 | 4.440045 | 4.474597 | 4.167644 | 3.013307 | 1.062481345 | high |
| GSM437220 | 4.547671233 | 0 | 4.7661   | 5.951986 | 4.671034 | 7.902248 | 8.039669 | 5.081717 | 3.61292  | 2.989612 | 2.555825 | 2.356737535 | high |
| GSM437221 | 10.46219178 | 0 | 4.306096 | 6.175639 | 5.772196 | 8.584435 | 5.838866 | 5.668531 | 3.568997 | 4.432644 | 3.449883 | 1.008227953 | high |
| GSM437222 | 9.913972603 | 0 | 7.019559 | 6.124725 | 5.091999 | 8.263527 | 7.033187 | 5.769644 | 3.990382 | 6.49028  | 2.380464 | 7.253808338 | high |
| GSM437223 | 8.789589041 | 0 | 2.747063 | 6.698399 | 4.683716 | 8.214794 | 8.044051 | 5.995545 | 3.489075 | 3.424497 | 2.542923 | 2.633412549 | high |
| GSM437224 | 7.314246575 | 0 | 3.961309 | 6.3645   | 4.685881 | 8.444041 | 8.774444 | 6.335535 | 3.916674 | 6.340924 | 3.268962 | 5.93479973  | high |
| GSM437225 | 8.419726027 | 0 | 5.554109 | 6.501468 | 4.775583 | 8.737384 | 8.744981 | 6.392946 | 3.787049 | 3.438892 | 2.854132 | 1.404905723 | high |
| GSM437226 | 7.009315068 | 0 | 6.129187 | 6.062422 | 4.812757 | 7.813036 | 8.204318 | 5.748802 | 3.35986  | 4.484649 | 2.760077 | 3.474541668 | high |
| GSM437228 | 7.103835616 | 0 | 2.950737 | 6.736382 | 5.177443 | 8.752104 | 6.357002 | 5.890972 | 3.656423 | 6.348836 | 3.185675 | 3.702158322 | high |
| GSM437231 | 6.249863014 | 0 | 4.766364 | 6.656459 | 4.992124 | 7.64625  | 5.941441 | 6.104133 | 4.616183 | 3.18985  | 2.768205 | 1.091993213 | high |
| GSM437232 | 6.503835616 | 0 | 3.793467 | 6.507694 | 5.544322 | 9.050307 | 5.731478 | 4.951779 | 4.708627 | 4.590827 | 3.019421 | 1.044567533 | high |
| GSM437234 | 6.595890411 | 0 | 3.423809 | 6.578438 | 4.999236 | 8.406197 | 6.019355 | 5.709823 | 3.788136 | 3.541222 | 2.569445 | 1.799769789 | high |

|           |             |   |          |          |          |          |          |          |          |          |          |             |      |
|-----------|-------------|---|----------|----------|----------|----------|----------|----------|----------|----------|----------|-------------|------|
| GSM437235 | 3.336986301 | 0 | 3.866885 | 6.461631 | 5.081158 | 8.155145 | 7.000242 | 5.803572 | 3.90006  | 4.131545 | 3.325748 | 1.363629049 | high |
| GSM437236 | 7.838630137 | 0 | 2.229155 | 5.827098 | 5.423914 | 7.838462 | 9.1027   | 5.290468 | 3.393105 | 3.475867 | 2.848057 | 2.808423599 | high |
| GSM437239 | 4.285479452 | 0 | 1.817149 | 6.309822 | 5.287775 | 8.27126  | 5.841868 | 4.998733 | 3.572704 | 3.187437 | 2.188323 | 2.551063034 | high |
| GSM437240 | 5.427945205 | 0 | 4.06814  | 6.301603 | 4.662838 | 8.377914 | 5.194963 | 6.394329 | 3.410824 | 5.047285 | 3.457379 | 2.542152782 | high |
| GSM437241 | 4.928219178 | 0 | 3.821357 | 6.251158 | 5.650957 | 8.791487 | 5.846913 | 6.69452  | 3.621778 | 3.978501 | 2.887253 | 1.523819633 | high |
| GSM437242 | 3.93369863  | 0 | 2.629135 | 5.700341 | 4.568901 | 8.254869 | 5.987314 | 6.159722 | 4.417172 | 3.360279 | 3.325748 | 2.021391516 | high |
| GSM437243 | 4.804109589 | 0 | 2.922223 | 6.606046 | 5.133581 | 8.712513 | 8.583665 | 6.797767 | 4.531962 | 3.938806 | 2.801043 | 1.952550038 | high |
| GSM437245 | 4.966027397 | 0 | 2.774341 | 6.230985 | 5.488367 | 8.406197 | 7.576126 | 6.433931 | 3.707081 | 3.766652 | 2.710764 | 2.293782074 | high |
| GSM437246 | 3.096164384 | 0 | 3.294622 | 6.488167 | 5.291933 | 7.483079 | 6.162642 | 4.955159 | 3.573589 | 4.142129 | 3.598221 | 1.082862851 | high |
| GSM437247 | 1.291232877 | 0 | 3.78366  | 5.994844 | 5.52646  | 8.57444  | 8.21211  | 5.950255 | 3.904931 | 3.802932 | 2.965279 | 1.69479825  | high |
| GSM437248 | 3.226027397 | 0 | 3.805577 | 6.6211   | 5.103365 | 8.214794 | 8.447988 | 5.333363 | 4.363302 | 3.921645 | 2.688044 | 1.777104433 | high |
| GSM437249 | 4.09890411  | 0 | 3.143011 | 6.111921 | 5.222663 | 8.27126  | 5.010757 | 6.145462 | 4.471039 | 4.647398 | 2.728614 | 3.056243573 | high |
| GSM437250 | 2.074520548 | 0 | 2.736132 | 5.712839 | 4.796215 | 7.881614 | 6.921193 | 6.507682 | 3.652532 | 3.579329 | 3.720714 | 1.90573392  | high |
| GSM437252 | 2.950684932 | 0 | 4.734907 | 6.573897 | 5.333358 | 8.360326 | 6.05904  | 5.487947 | 4.248594 | 4.754289 | 2.997568 | 1.467075151 | high |
| GSM437254 | 3.023013699 | 0 | 5.683175 | 6.306037 | 5.603396 | 7.902248 | 6.979859 | 6.220657 | 3.377085 | 3.781627 | 2.787149 | 1.450538334 | high |
| GSM437255 | 3.41260274  | 0 | 4.590733 | 6.420783 | 5.196147 | 8.314888 | 6.098934 | 5.104129 | 4.872233 | 4.393535 | 3.273512 | 1.01562919  | high |
| GSM437259 | 2.104931507 | 0 | 4.640408 | 6.37105  | 5.881358 | 8.491169 | 5.387743 | 6.731601 | 3.777561 | 5.458639 | 3.305659 | 1.658378902 | high |
| GSM437260 | 6.903287671 | 0 | 4.257979 | 5.951321 | 4.991139 | 7.929478 | 6.809353 | 6.032885 | 3.643283 | 3.322205 | 2.975813 | 1.859341807 | high |
| GSM437262 | 0.688767123 | 0 | 2.865101 | 6.376802 | 4.608856 | 8.499978 | 7.513555 | 6.066438 | 3.886263 | 4.912032 | 3.814946 | 2.005006663 | high |
| GSM437263 | 1.494246575 | 0 | 2.63625  | 6.174026 | 5.208034 | 8.314888 | 6.661104 | 5.51894  | 4.275793 | 2.843607 | 2.913205 | 1.172052785 | high |
| GSM437265 | 7.813972603 | 0 | 3.419602 | 6.511826 | 4.912212 | 7.981672 | 8.429493 | 6.336766 | 4.12408  | 3.879158 | 3.112521 | 1.873639214 | high |
| GSM437272 | 6.125753425 | 0 | 3.520817 | 6.892471 | 5.233842 | 8.491169 | 5.202928 | 4.784103 | 3.381839 | 3.942291 | 2.564645 | 1.420314911 | high |
| GSM437276 | 4.158082192 | 0 | 4.307931 | 6.586365 | 5.601623 | 8.874588 | 5.994009 | 7.200494 | 3.101616 | 4.496551 | 3.568634 | 0.998279282 | high |
| GSM437278 | 4.804109589 | 0 | 4.130158 | 7.002588 | 5.284975 | 8.5108   | 5.499004 | 7.001477 | 3.320814 | 3.930415 | 2.961733 | 1.15610794  | high |
| GSM437280 | 4.482739726 | 0 | 3.566257 | 7.309876 | 5.298922 | 8.846624 | 5.968635 | 7.224309 | 2.967522 | 5.221753 | 3.188956 | 1.665334212 | high |
| GSM437307 | 4.691011447 | 0 | 2.629135 | 6.023596 | 5.488017 | 8.377914 | 9.04893  | 4.503308 | 3.042384 | 2.816787 | 2.331007 | 2.188572414 | high |
| GSM437313 | 5.593544756 | 0 | 4.134561 | 6.755775 | 5.629875 | 8.462447 | 8.880513 | 5.179754 | 3.522988 | 2.627864 | 2.100719 | 1.155003479 | high |
| GSM437314 | 4.120848189 | 0 | 2.747063 | 6.66006  | 4.974531 | 8.207024 | 8.812388 | 6.335535 | 4.009038 | 2.601473 | 2.372328 | 1.808316402 | high |
| GSM437315 | 5.823231375 | 0 | 4.191821 | 6.637214 | 5.350408 | 8.396519 | 7.675315 | 8.25352  | 3.250143 | 2.66794  | 2.43882  | 1.600609297 | high |
| GSM437318 | 6.309626573 | 0 | 3.293248 | 6.875385 | 5.867179 | 8.279663 | 8.001472 | 6.020345 | 3.722943 | 2.832016 | 2.335151 | 1.03451669  | high |
