# Supplementary figures and images for: Single-Cell RNA Sequencing Reveals the Role of Epithelial Cell Marker Genes in Predicting the Prognosis of Colorectal Cancer Patients
Source: Hindawi journal article supplement (doi:10.1155/2022/8347125), 2022-08-01

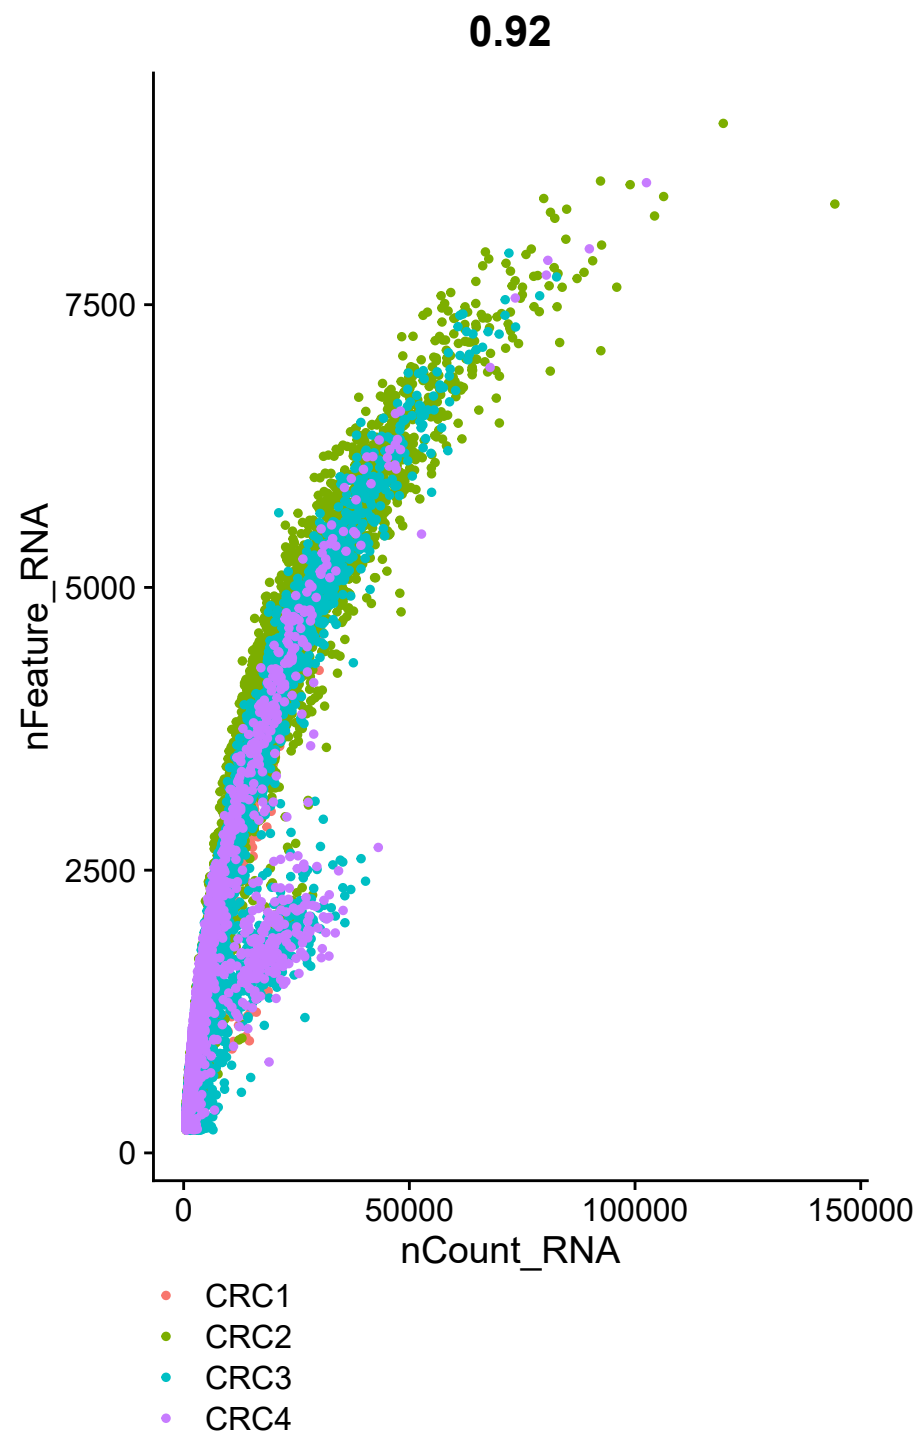

Supplement: f1 [file 8347125.f1.zip]

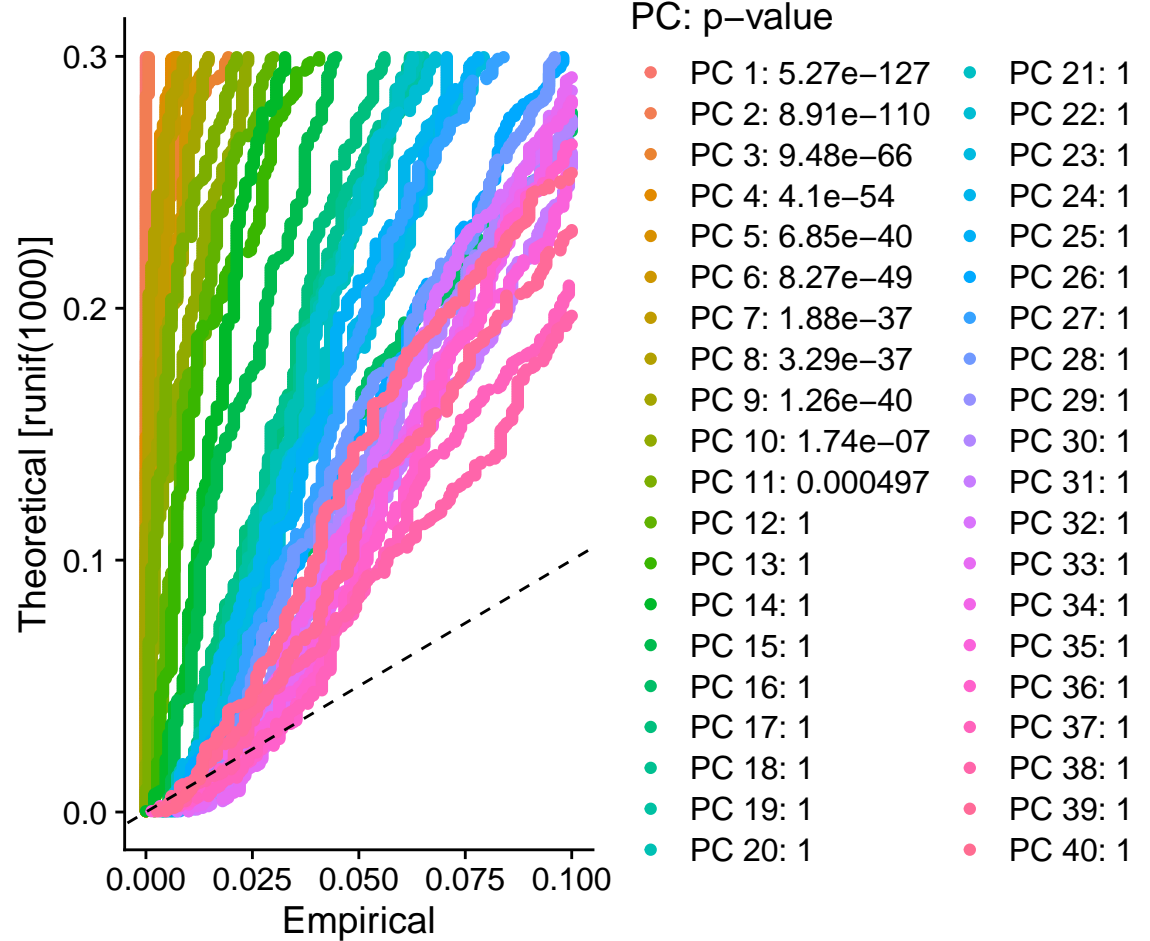

Supplement: f1 [file 8347125.f1.zip]

**EPCAM**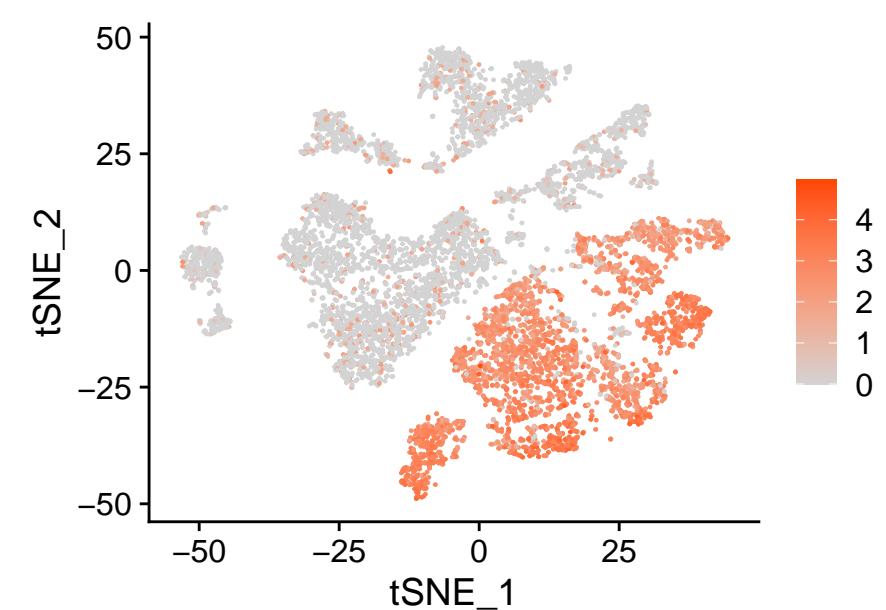**KRT19**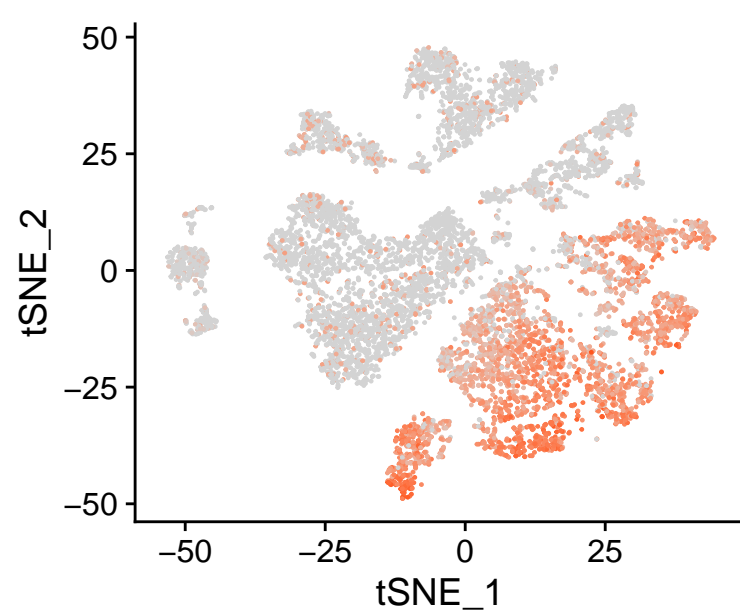**CDH1**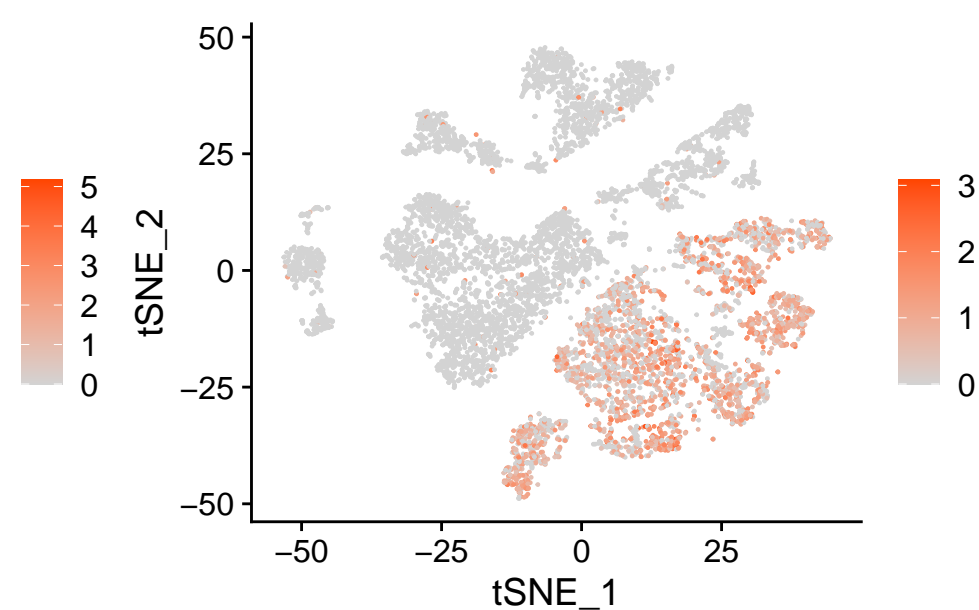**CD79A**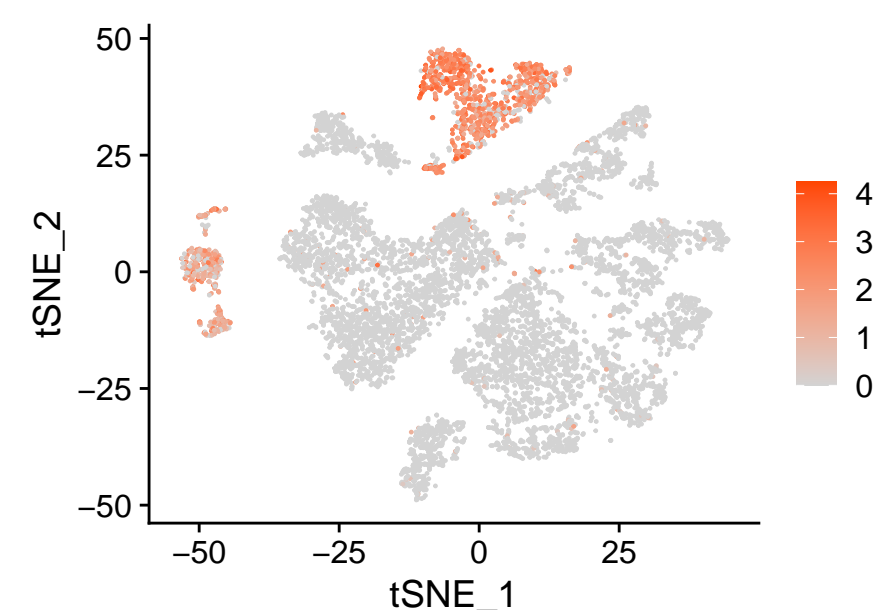**MS4A1**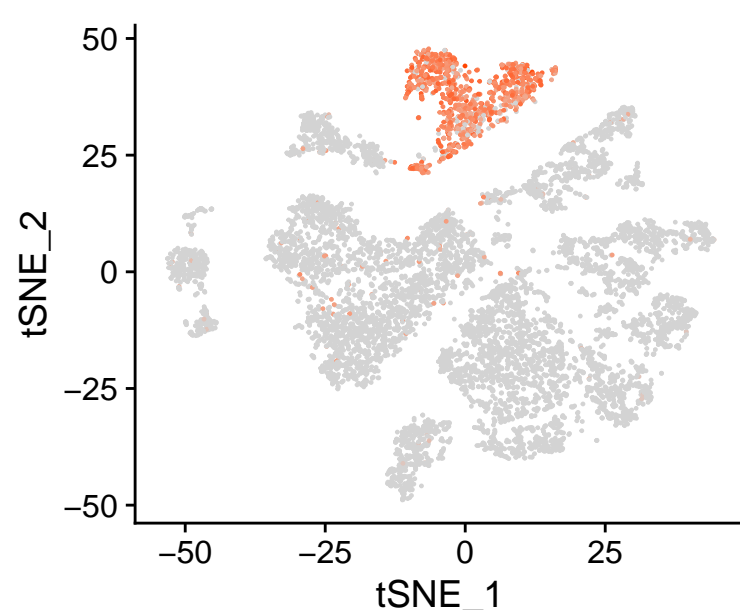**CD19**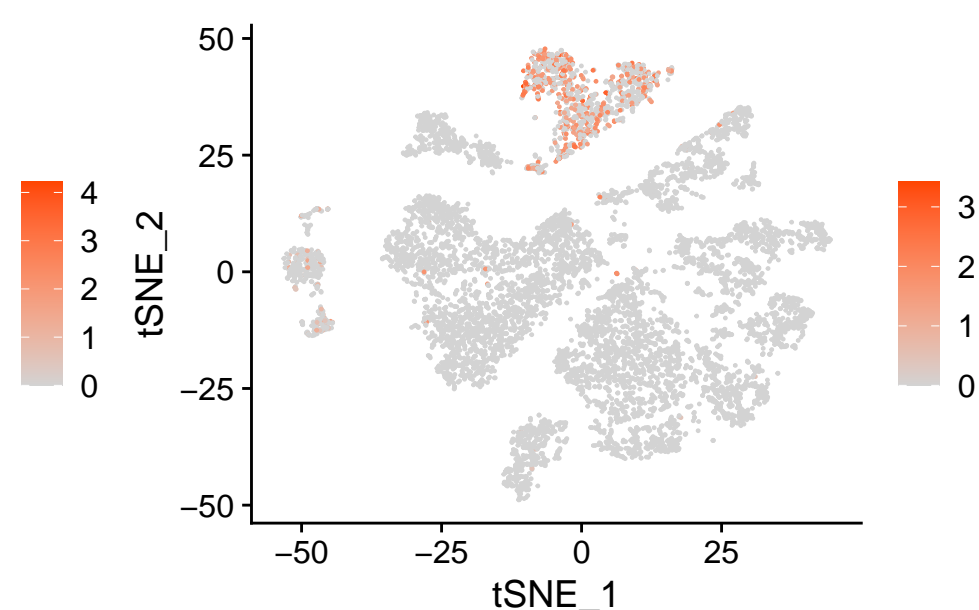**CD8A**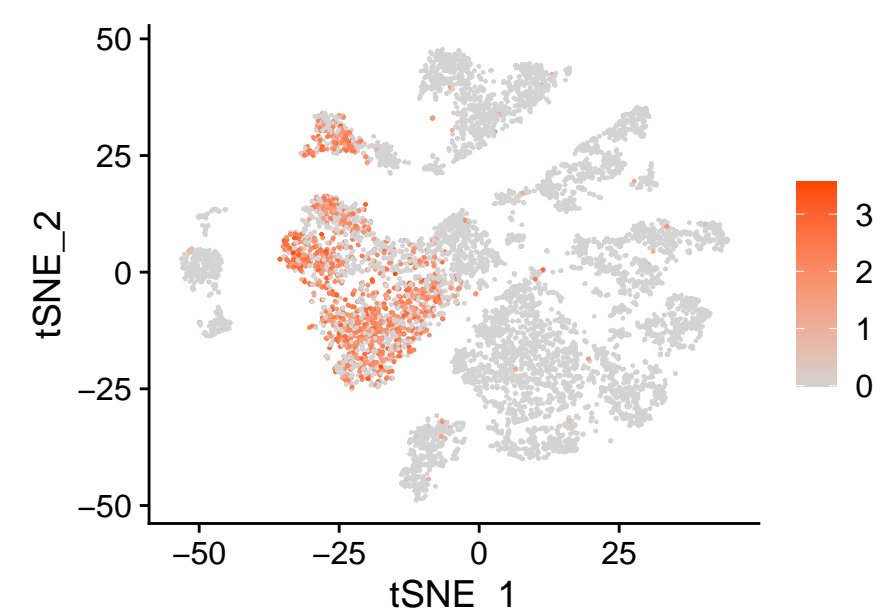**CD3E**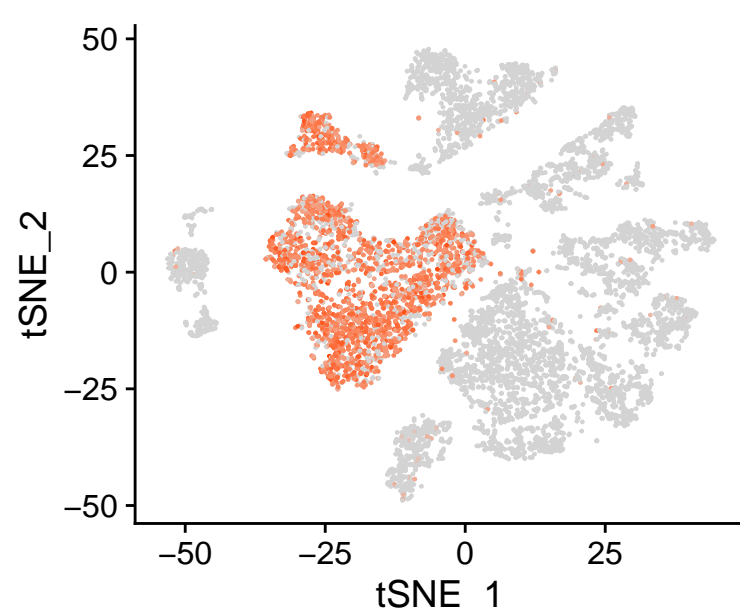**CD3D**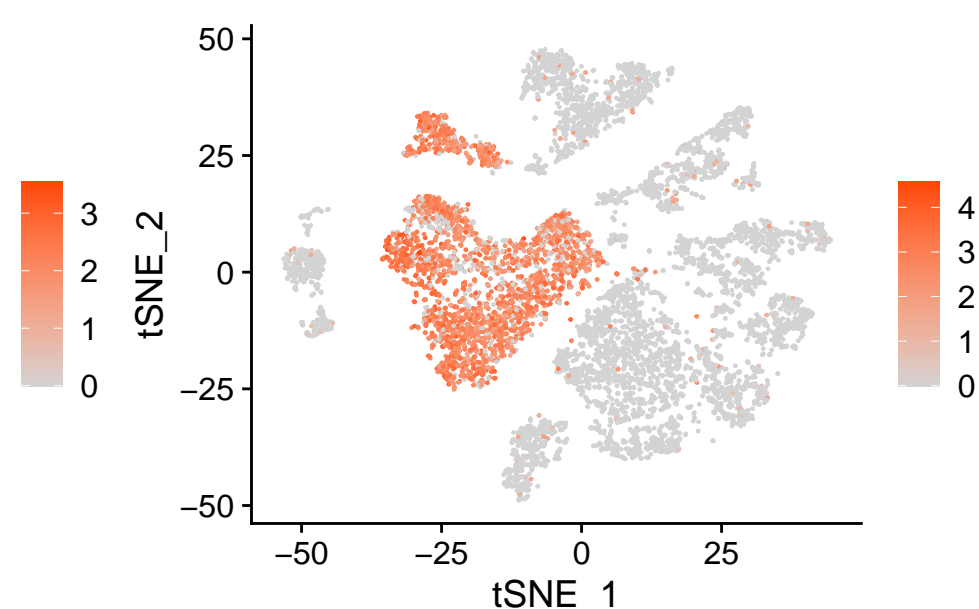**CD14**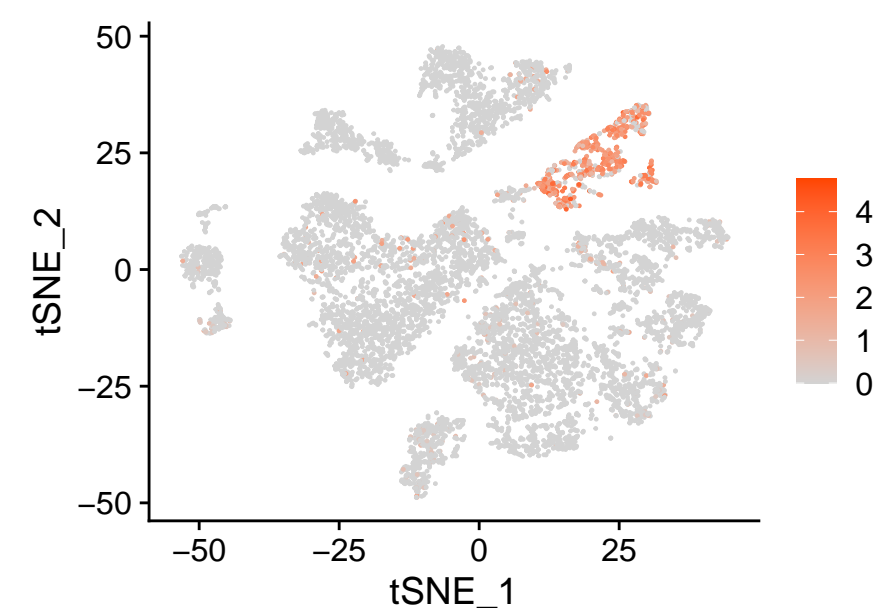**CD163**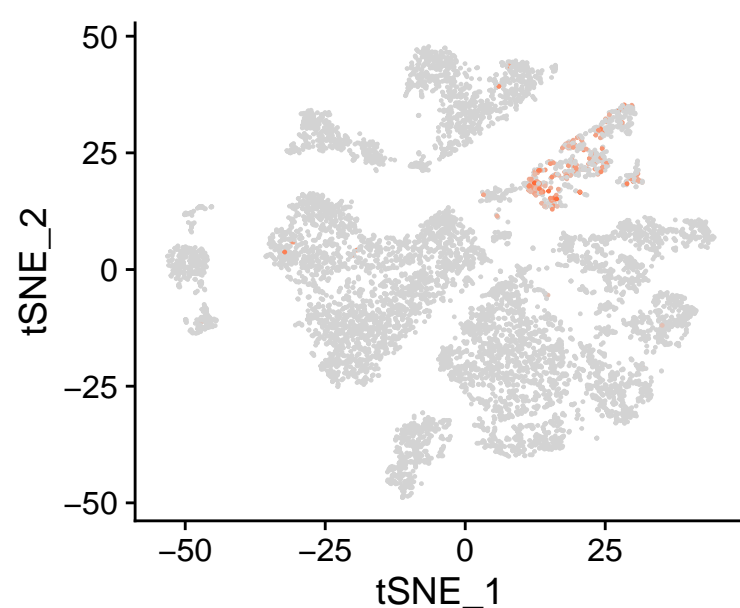**CD68**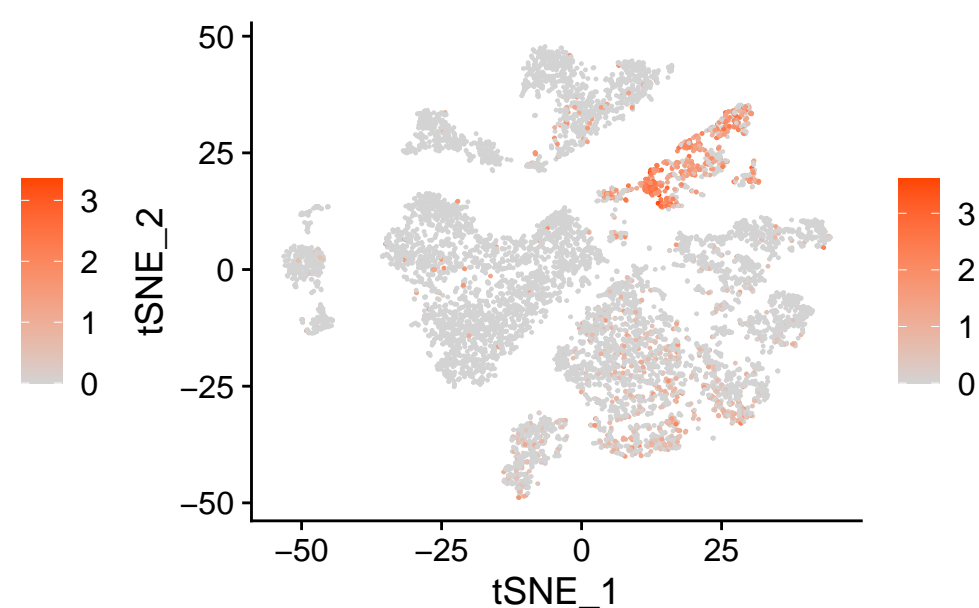**IL3RA**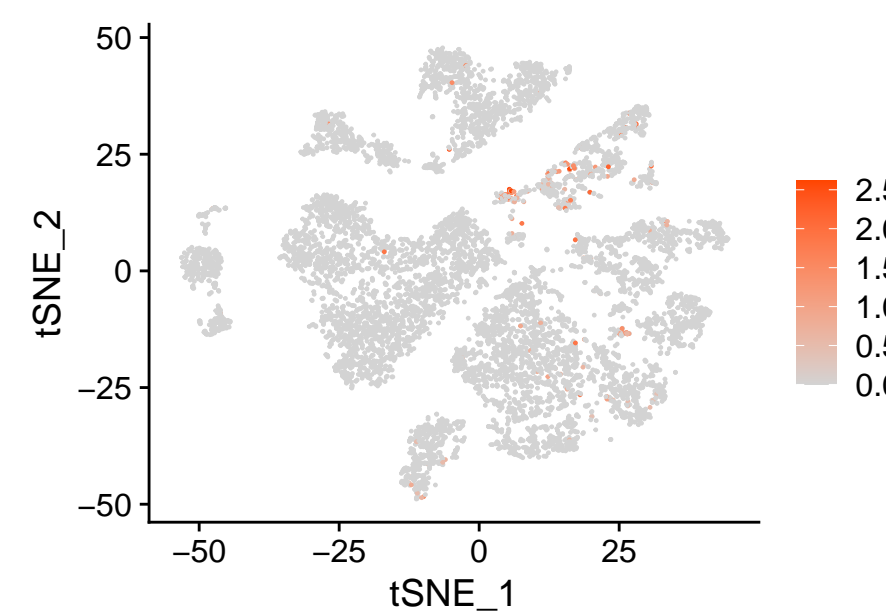**SERPINF1**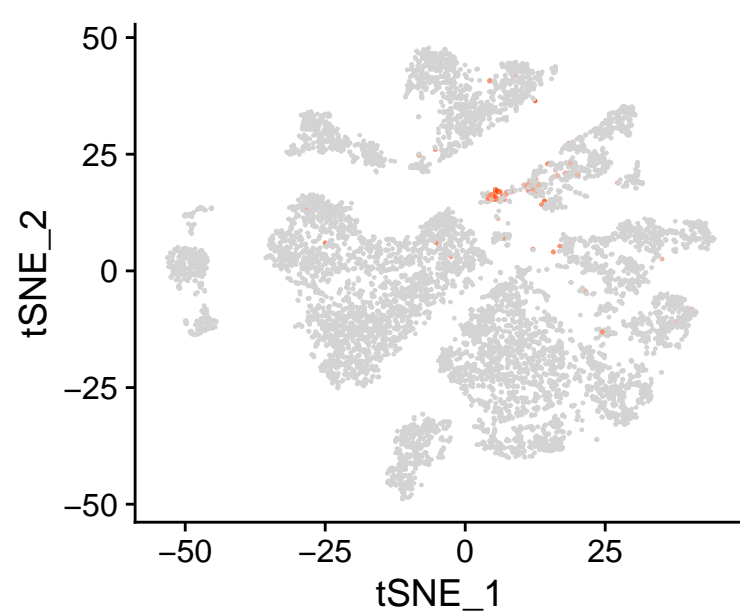**CCDC88A**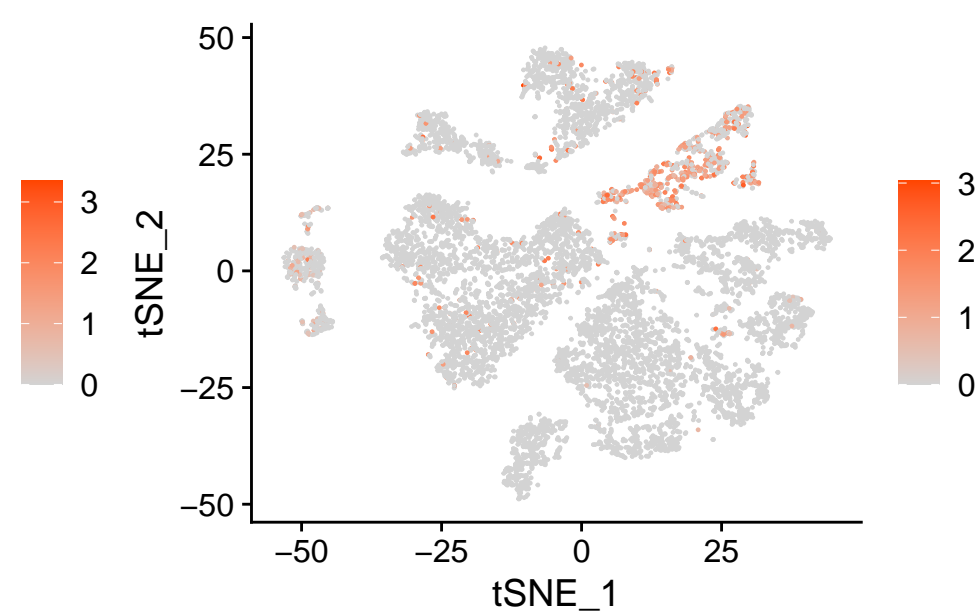

Supplement: f1 [file 8347125.f1.zip]

### nFeature\_RNA

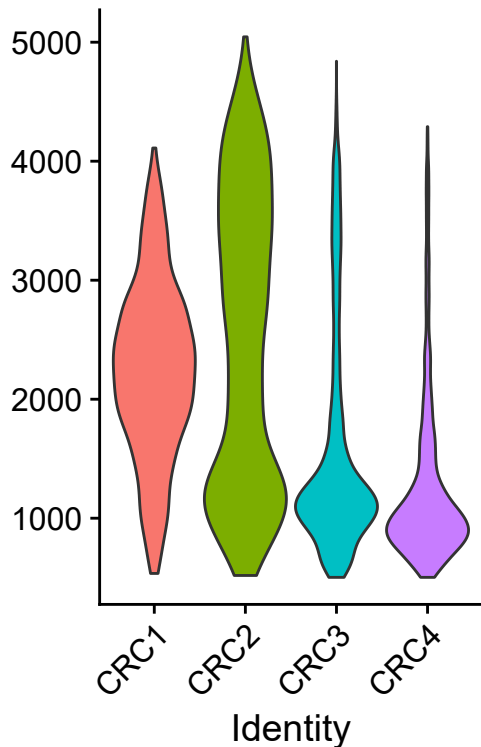

### nCount\_RNA

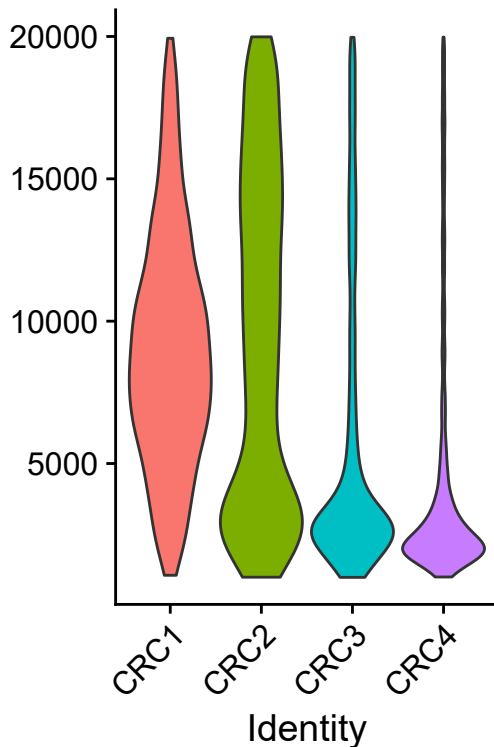

### percent.mt

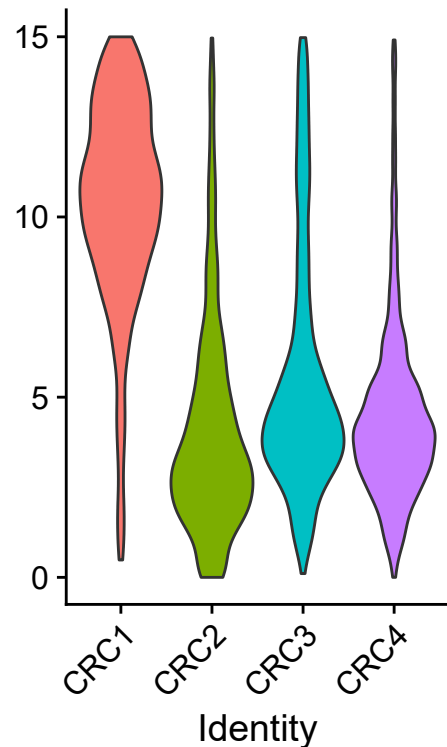

Supplement: f1 [file 8347125.f1.zip]

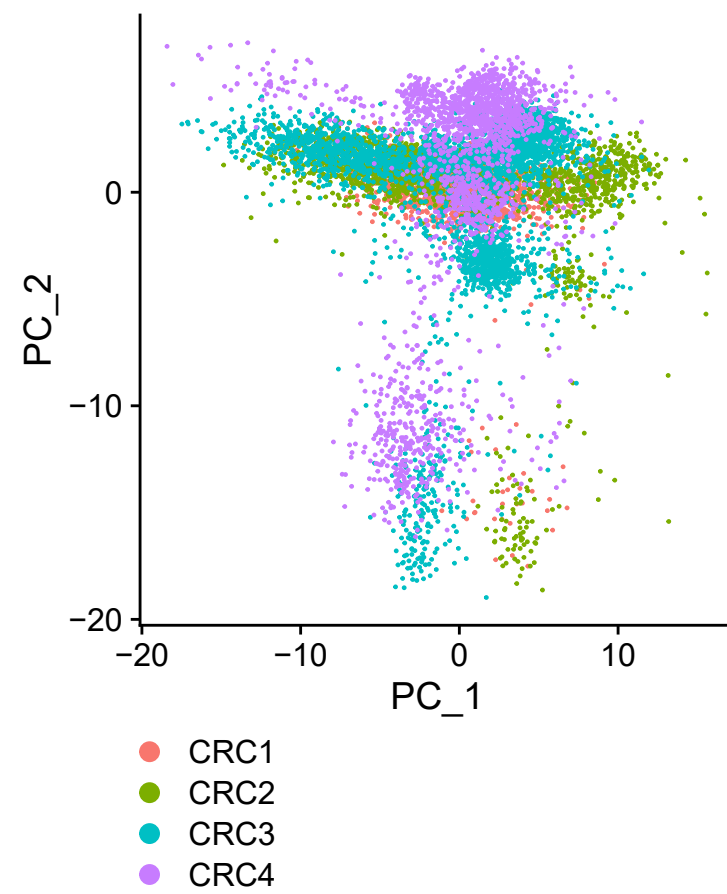

Supplement: f1 [file 8347125.f1.zip]

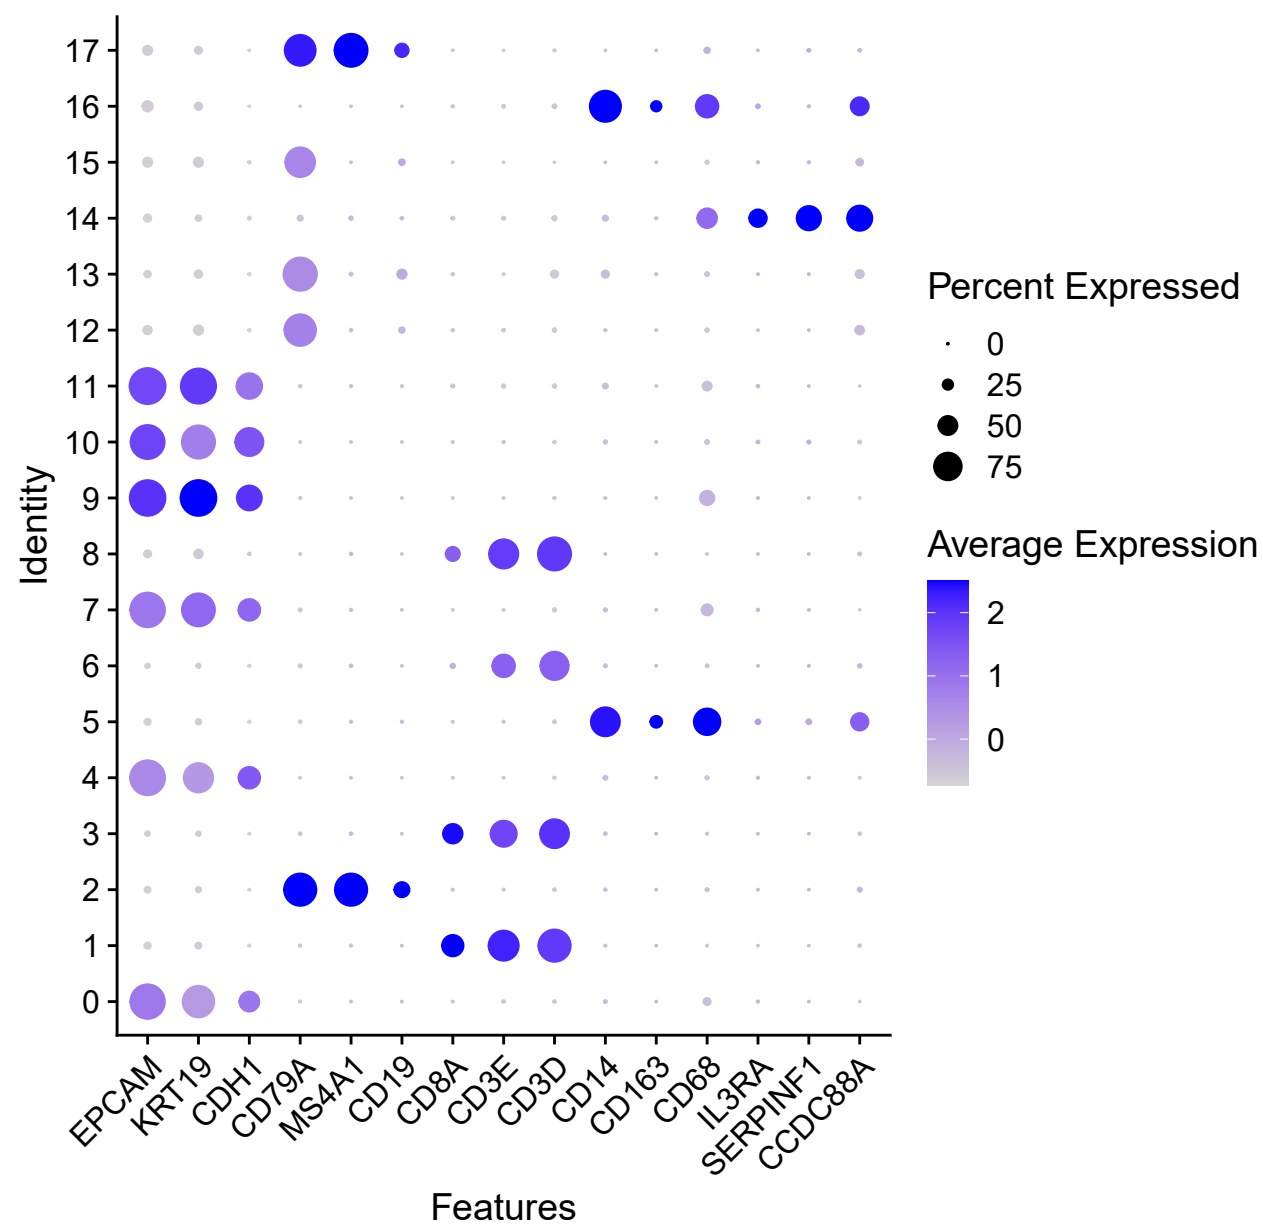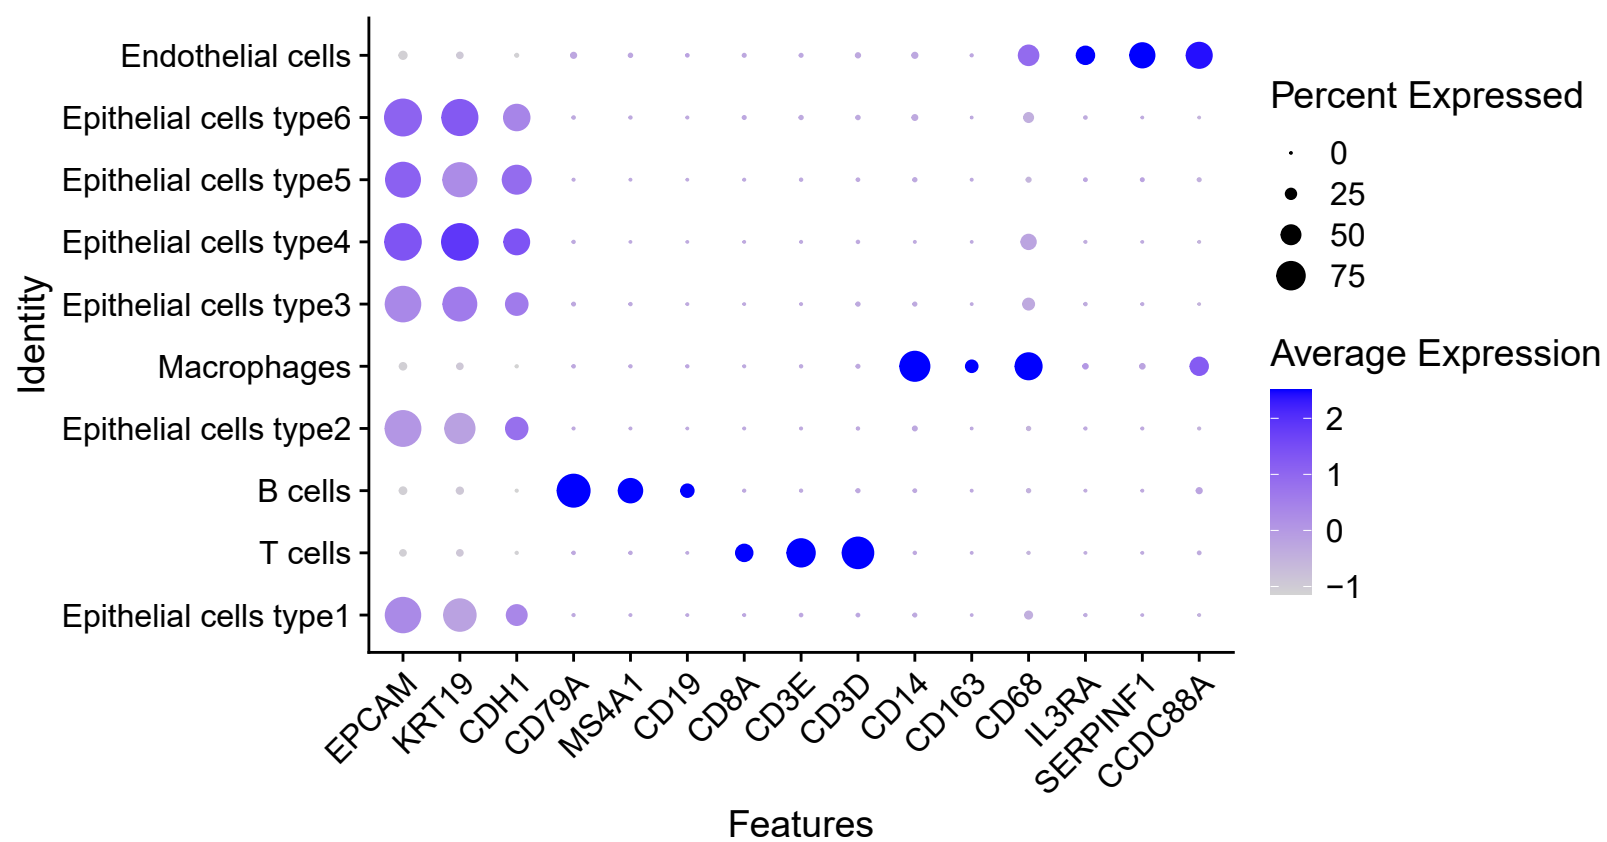

Supplement: f1 [file 8347125.f1.zip]

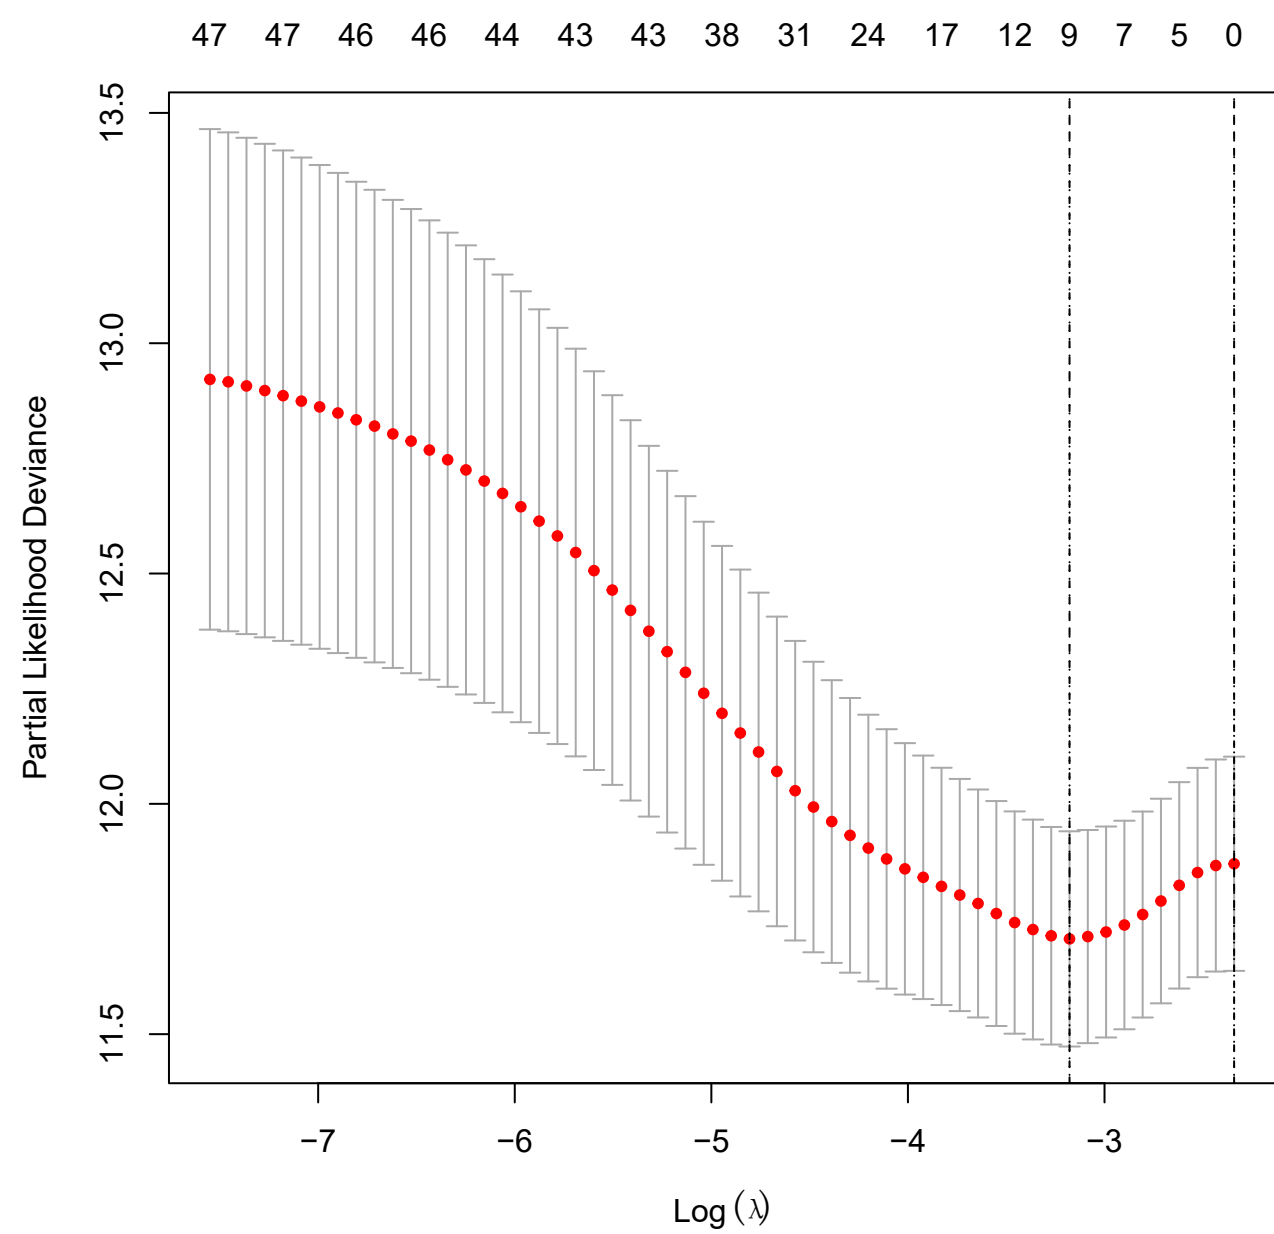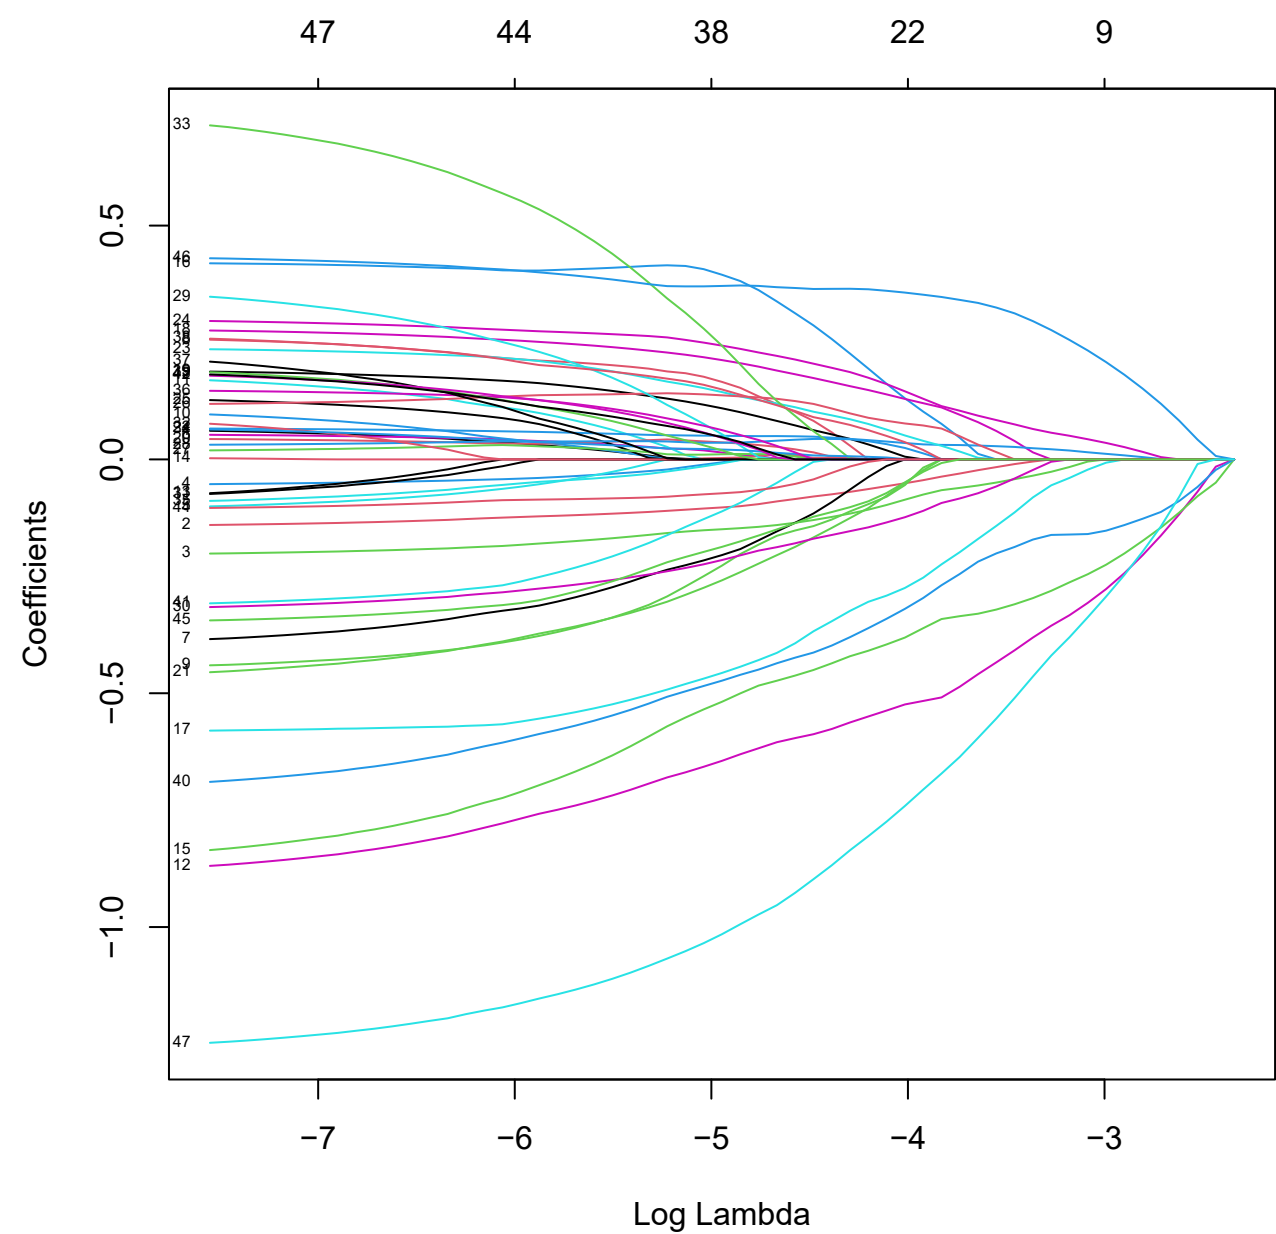

Supplement: f1 [file 8347125.f1.zip]
